# Supplementary material
Source: ML conference proceedings conference paper supplement (https://openreview.net/forum?id=X9SNL203cV)
Supplement: supplementary_material [file summary_statistics.xlsx]

## Sheet: Summary
Model	Program_Type	Prompt Strategy	Accuracy (%)	Precision (%)	Recall (%)	F1 Score (%)	Correct Predictions	Total Predictions
Qwen/Qwen2.5-72B-Instruct	masked	COT	83.82	85.33	88.28	86.78	202	241
Qwen/Qwen2.5-72B-Instruct	masked	ZS	59.34	90.91	34.97	50.51	143	241
Qwen/Qwen2.5-72B-Instruct	obfuscated	COT	78.84	79.08	86.43	82.59	190	241
Qwen/Qwen2.5-72B-Instruct	obfuscated	ZS	51.87	87.1	19.42	31.76	125	241
Qwen/Qwen2.5-72B-Instruct	unmasked	COT	83.82	83.66	90.14	86.78	202	241
Qwen/Qwen2.5-72B-Instruct	unmasked	ZS	59.75	92.59	34.97	50.76	144	241
Qwen/Qwen2.5-7B-Instruct	masked	COT	75.1	76.43	83.92	80	181	241
Qwen/Qwen2.5-7B-Instruct	masked	ZS	58.09	81.25	36.88	50.73	140	241
Qwen/Qwen2.5-7B-Instruct	obfuscated	COT	65.56	71.11	68.57	69.82	158	241
Qwen/Qwen2.5-7B-Instruct	obfuscated	ZS	43.57	61.54	11.27	19.05	105	241
Qwen/Qwen2.5-7B-Instruct	unmasked	COT	75.1	75.9	86.3	80.77	181	241
Qwen/Qwen2.5-7B-Instruct	unmasked	ZS	56.43	73.49	42.36	53.74	136	241
Qwen/Qwen2.5-Coder-32B-Instruct	masked	COT	80.08	81.17	86.81	83.89	193	241
Qwen/Qwen2.5-Coder-32B-Instruct	masked	ZS	66.39	80.85	54.68	65.24	160	241
Qwen/Qwen2.5-Coder-32B-Instruct	obfuscated	COT	75.93	76.62	84.29	80.27	183	241
Qwen/Qwen2.5-Coder-32B-Instruct	obfuscated	ZS	49.79	72.92	24.48	36.65	120	241
Qwen/Qwen2.5-Coder-32B-Instruct	unmasked	COT	82.99	82.69	90.21	86.29	200	241
Qwen/Qwen2.5-Coder-32B-Instruct	unmasked	ZS	68.46	81.63	57.97	67.8	165	241
deepseek-ai/DeepSeek-R1	masked	ZS	84.23	91.94	80.28	85.71	203	241
deepseek-ai/DeepSeek-R1	obfuscated	ZS	83.4	90.4	80.14	84.96	201	241
deepseek-ai/DeepSeek-R1	unmasked	ZS	82.57	90.62	79.45	84.67	199	241
deepseek-ai/DeepSeek-V3-0324	masked	COT	87.55	86.58	92.81	89.58	211	241
deepseek-ai/DeepSeek-V3-0324	masked	ZS	77.18	76.22	88.65	81.97	186	241
deepseek-ai/DeepSeek-V3-0324	obfuscated	COT	81.74	81.82	88.73	85.14	197	241
deepseek-ai/DeepSeek-V3-0324	obfuscated	ZS	72.2	72.02	85.82	78.32	174	241
deepseek-ai/DeepSeek-V3-0324	unmasked	COT	86.31	88.36	88.97	88.66	208	241
deepseek-ai/DeepSeek-V3-0324	unmasked	ZS	81.74	80.75	90.91	85.53	197	241
gpt-4.1-2025-04-14	masked	COT	85.06	89.71	84.72	87.14	205	241
gpt-4.1-2025-04-14	masked	ZS	78.84	81.51	83.22	82.35	190	241
gpt-4.1-2025-04-14	obfuscated	COT	83.82	87.5	84.4	85.92	202	241
gpt-4.1-2025-04-14	obfuscated	ZS	78.01	77.78	88.11	82.62	188	241
gpt-4.1-2025-04-14	unmasked	COT	85.06	89.39	84.29	86.76	205	241
gpt-4.1-2025-04-14	unmasked	ZS	78.42	81.62	80.43	81.02	189	241
gpt-4.1-mini-2025-04-14	masked	COT	87.14	86.9	91.3	89.05	210	241
gpt-4.1-mini-2025-04-14	masked	ZS	73.03	79.14	75.34	77.19	176	241
gpt-4.1-mini-2025-04-14	obfuscated	COT	78.84	80.13	85.21	82.59	190	241
gpt-4.1-mini-2025-04-14	obfuscated	ZS	77.59	76.65	89.51	82.58	187	241
gpt-4.1-mini-2025-04-14	unmasked	COT	83.4	86.62	85.42	86.01	201	241
gpt-4.1-mini-2025-04-14	unmasked	ZS	72.61	76.76	76.76	76.76	175	241
gpt-4.1-nano-2025-04-14	masked	COT	78.84	76.47	92.2	83.6	190	241
gpt-4.1-nano-2025-04-14	masked	ZS	63.49	61.99	97.16	75.69	153	241
gpt-4.1-nano-2025-04-14	obfuscated	COT	68.88	67.63	86.03	75.73	166	241
gpt-4.1-nano-2025-04-14	obfuscated	ZS	60.58	60.58	100	75.45	146	241
gpt-4.1-nano-2025-04-14	unmasked	COT	82.16	80.12	93.01	86.08	198	241
gpt-4.1-nano-2025-04-14	unmasked	ZS	60.17	60.18	94.33	73.48	145	241
gpt-4o-mini-2024-07-18	masked	COT	78.42	80.52	84.93	82.67	189	241
gpt-4o-mini-2024-07-18	masked	COT-Unrolled	80.91	78.92	92.25	85.06	195	241
gpt-4o-mini-2024-07-18	masked	ZS	46.47	67.57	17.61	27.93	112	241
gpt-4o-mini-2024-07-18	obfuscated	COT	72.2	78.26	74.48	76.33	174	241
gpt-4o-mini-2024-07-18	obfuscated	ZS	46.47	78.95	10.71	18.87	112	241
gpt-4o-mini-2024-07-18	unmasked	COT	80.08	79.22	88.41	83.56	193	241
gpt-4o-mini-2024-07-18	unmasked	COT-Unrolled	81.33	80	91.67	85.44	196	241
gpt-4o-mini-2024-07-18	unmasked	ZS	49.38	69.39	24.11	35.79	119	241
mistralai/Mistral-Small-24B-Instruct-2501	masked	COT	80.08	81.88	85.31	83.56	193	241
mistralai/Mistral-Small-24B-Instruct-2501	masked	ZS	47.3	64.71	23.24	34.2	114	241
mistralai/Mistral-Small-24B-Instruct-2501	obfuscated	COT	73.86	76.32	81.12	78.64	178	241
mistralai/Mistral-Small-24B-Instruct-2501	obfuscated	ZS	41.49	0	0	0	100	241
mistralai/Mistral-Small-24B-Instruct-2501	unmasked	COT	79.67	80.13	86.43	83.16	192	241
mistralai/Mistral-Small-24B-Instruct-2501	unmasked	ZS	40.25	54.29	12.93	20.88	97	241
o4-mini-2025-04-16	masked	ZS	87.97	93.18	86.01	89.45	212	241
o4-mini-2025-04-16	obfuscated	ZS	84.23	90.23	82.76	86.33	203	241
o4-mini-2025-04-16	unmasked	ZS	87.55	91.73	86.52	89.05	211	241
