# Supplementary material
Source: ML conference proceedings conference paper supplement (https://openreview.net/forum?id=X9SNL203cV)
Supplement: supplementary_material [file summary_statistics.xlsx]

## Sheet: Summary
Category	Subcategory	Accuracy (%)	Precision (%)	Recall (%)	F1 Score (%)	correct_predictions	total_predictions	true_positive	true_negative	false_positive	false_negative
Overall	All Data	72.35	79.25	71.93	75.41	10810	14942	6336	4474	1659	2473
By Model	Qwen/Qwen2.5-72B-Instruct	69.57	84.56	59.15	69.61	1006	1446	504	502	92	348
By Model	Qwen/Qwen2.5-7B-Instruct	62.31	74.64	55.02	63.35	901	1446	471	430	160	385
By Model	Qwen/Qwen2.5-Coder-32B-Instruct	70.61	79.97	66.47	72.6	1021	1446	563	458	141	284
By Model	deepseek-ai/DeepSeek-R1	83.4	90.98	79.95	85.11	603	723	343	260	34	86
By Model	deepseek-ai/DeepSeek-V3-0324	81.12	80.68	89.31	84.77	1173	1446	760	413	182	91
By Model	gpt-4.1-2025-04-14	81.54	84.32	84.22	84.27	1179	1446	715	464	133	134
By Model	gpt-4.1-mini-2025-04-14	78.77	80.93	83.86	82.37	1139	1446	717	422	169	138
By Model	gpt-4.1-nano-2025-04-14	69.02	66.78	93.87	78.04	998	1446	796	202	396	52
By Model	gpt-4o-mini-2024-07-18	66.91	78.34	60.72	68.42	1290	1928	691	599	191	447
By Model	mistralai/Mistral-Small-24B-Instruct-2501	60.44	76.25	48.07	58.97	874	1446	411	463	128	444
By Model	o4-mini-2025-04-16	86.58	91.71	85.08	88.27	626	723	365	261	33	64
By Prompt	COT	79.79	80.89	86.02	83.37	5192	6507	3297	1895	779	536
By Prompt	ZS	65.72	77.37	59.19	67.07	5227	7953	2776	2451	812	1914
By Program Type	Masked	74.25	80.56	74.33	77.32	3758	5061	2221	1537	536	767
By Program Type	Obfuscated	68.44	76.57	66.7	71.3	3299	4820	1889	1410	578	943
By Program Type	Unmasked	74.16	80.33	74.47	77.29	3753	5061	2226	1527	545	763
By Strategy Kind	Deterministic	77.56	80.79	80	80.39	7357	9486	4365	2992	1038	1091
By Strategy Kind	Stochastic	63.29	76.04	58.78	66.31	3453	5456	1971	1482	621	1382
