# Supplementary material (part 2 of 2)
Source: ML conference proceedings conference paper supplement (https://openreview.net/forum?id=X9SNL203cV)

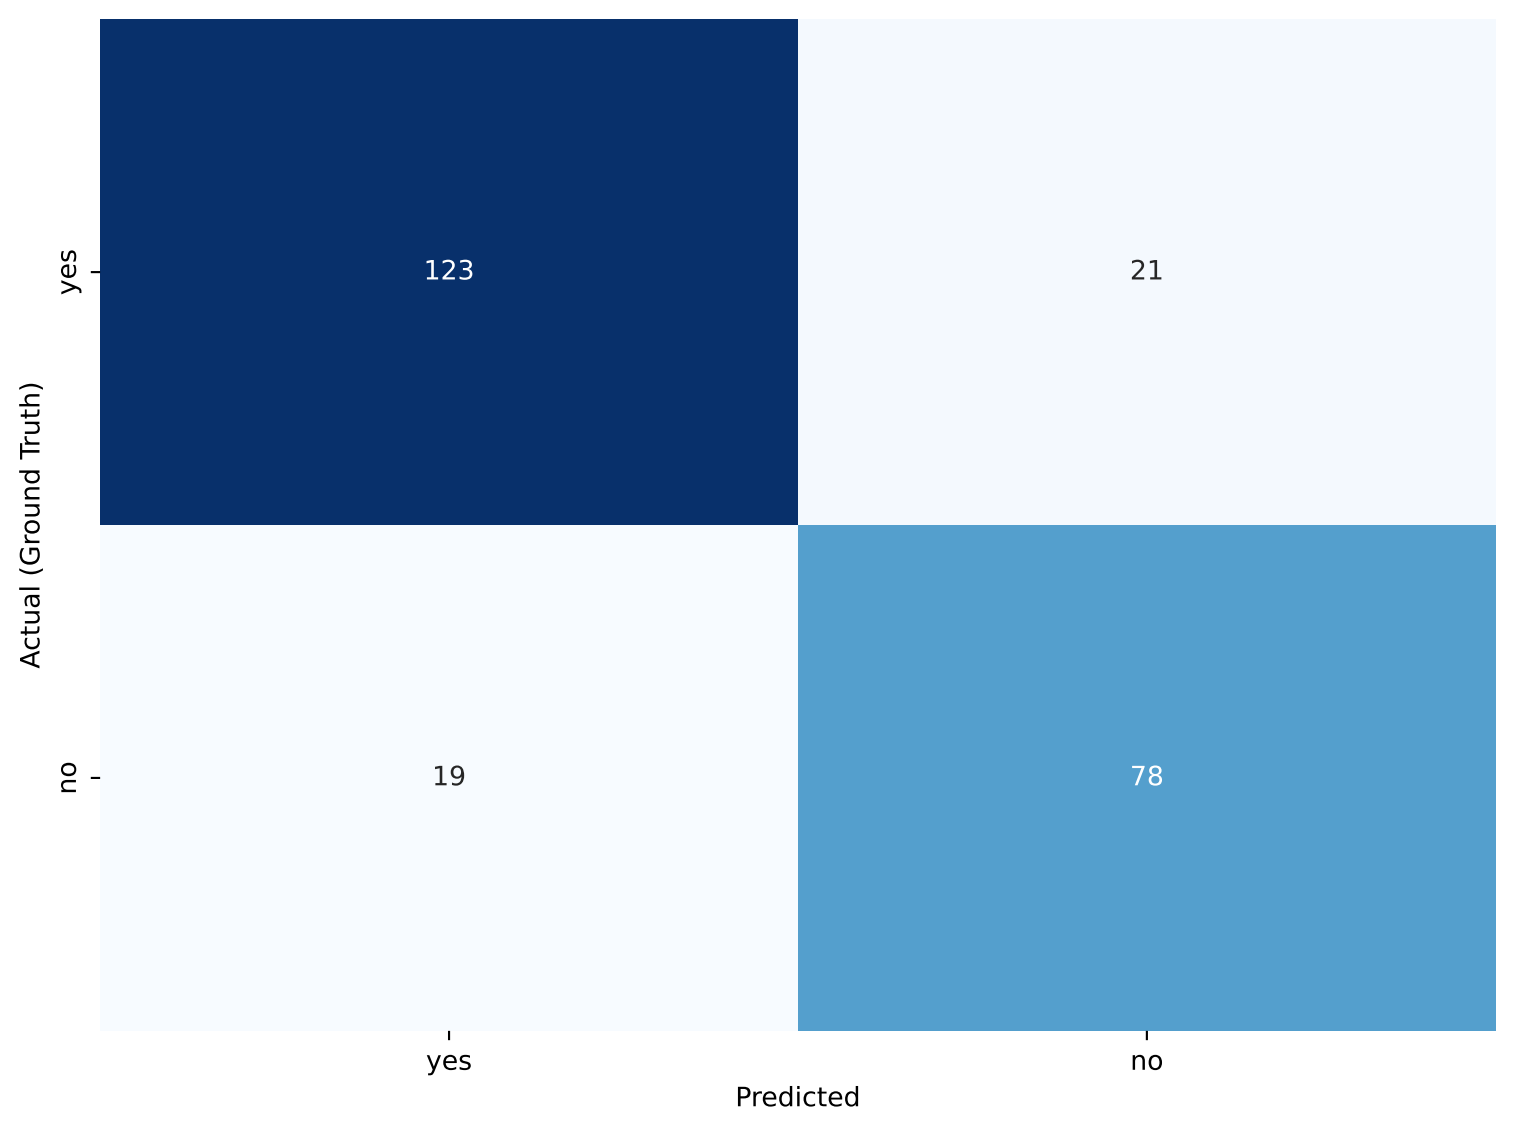

Supplement: supplementary_material [file cm_gpt-4.1-mini-2025-04-14_unmasked_COT.pdf › Supplementary Material/FindNICE Benchmark/visualizations/confusion_matrices/cm_gpt-4.1-mini-2025-04-14_unmasked_COT.pdf]

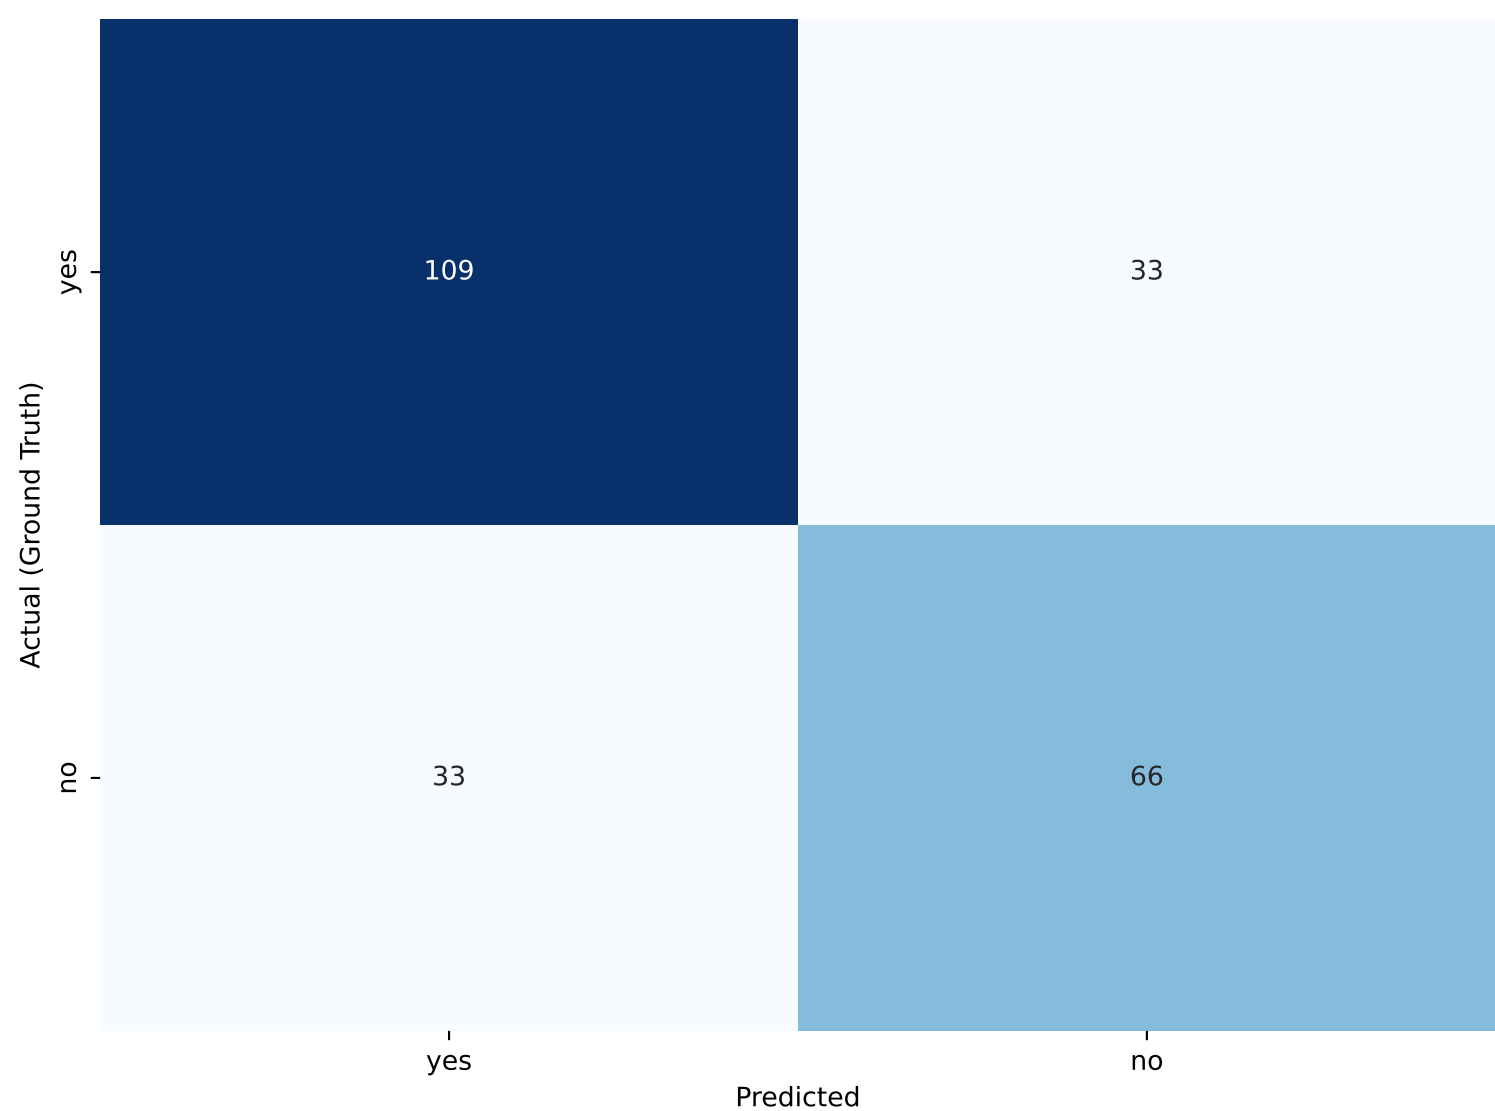

Supplement: supplementary_material [file cm_gpt-4.1-mini-2025-04-14_unmasked_ZS.pdf › Supplementary Material/FindNICE Benchmark/visualizations/confusion_matrices/cm_gpt-4.1-mini-2025-04-14_unmasked_ZS.pdf]

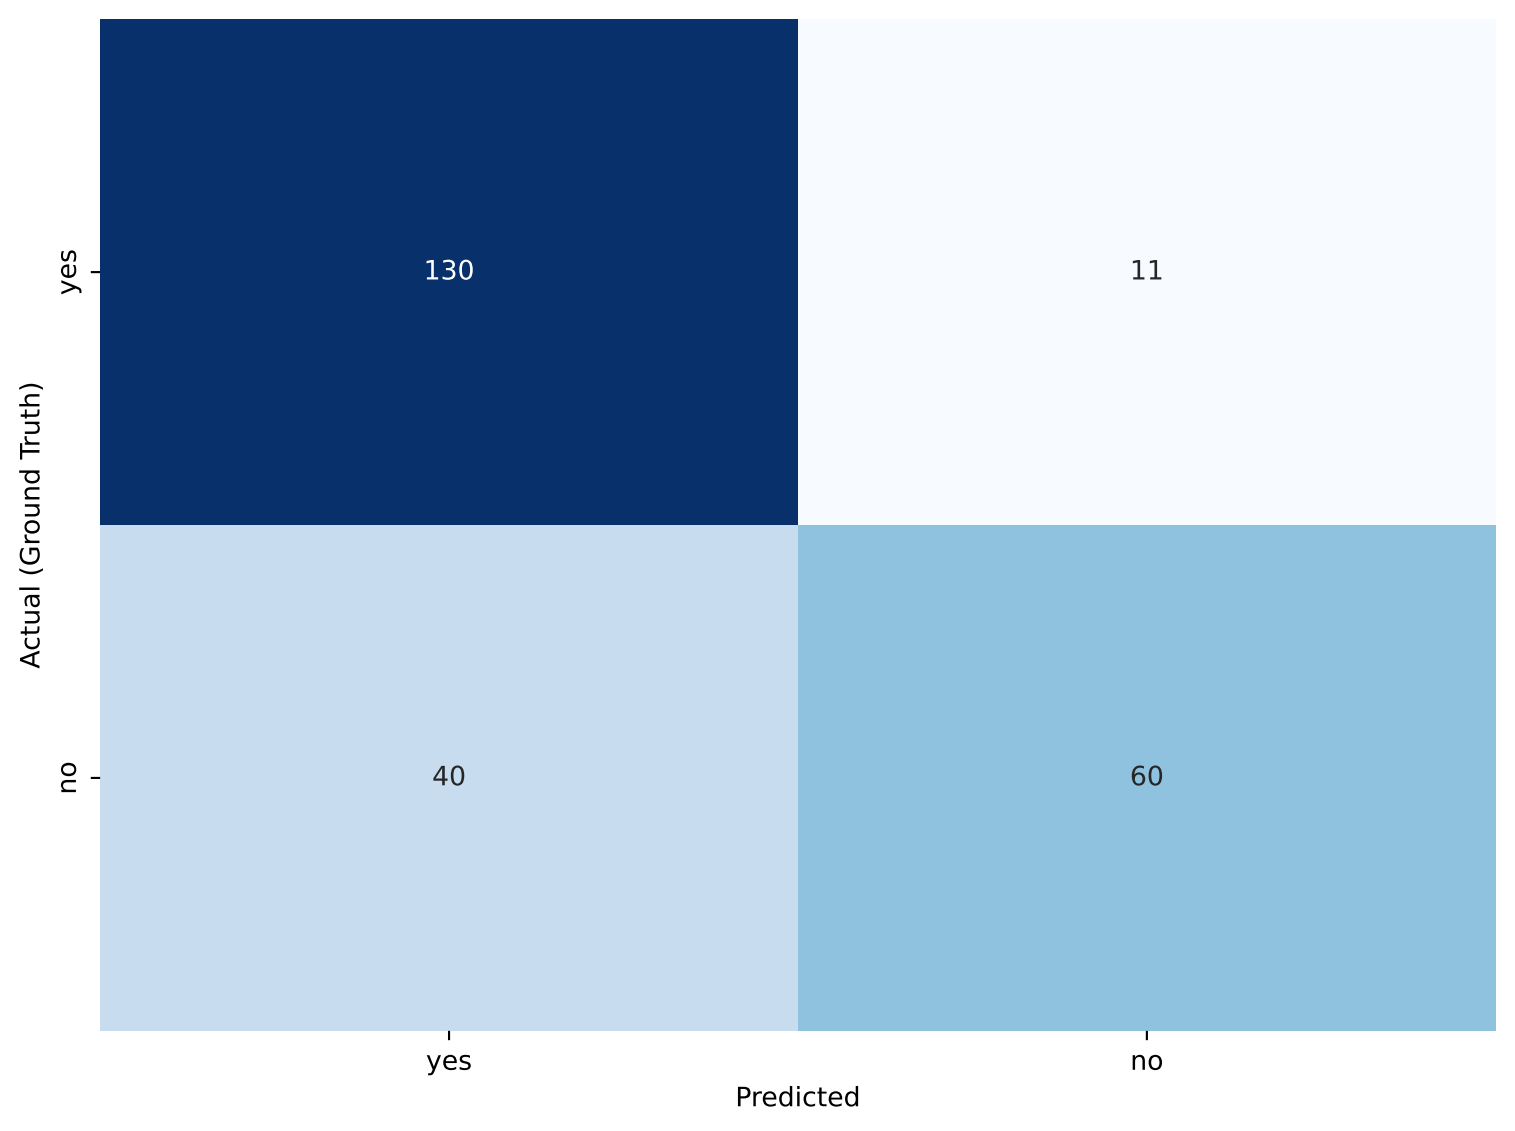

Supplement: supplementary_material [file cm_gpt-4.1-nano-2025-04-14_masked_COT.pdf › Supplementary Material/FindNICE Benchmark/visualizations/confusion_matrices/cm_gpt-4.1-nano-2025-04-14_masked_COT.pdf]

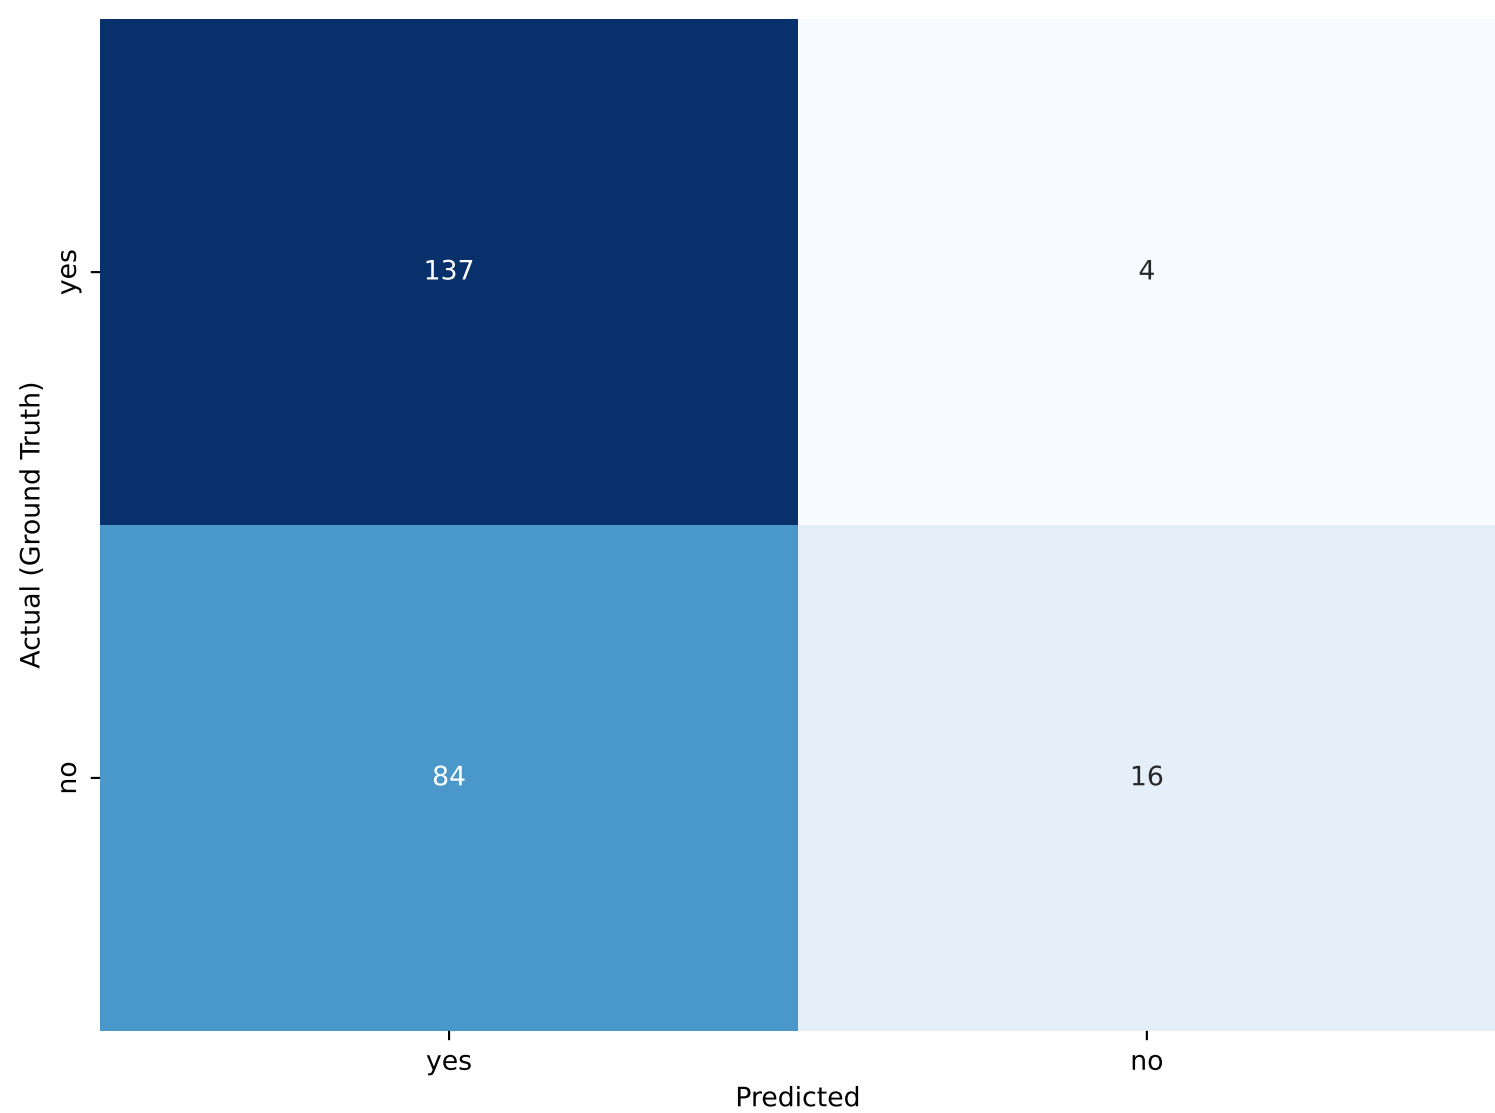

Supplement: supplementary_material [file cm_gpt-4.1-nano-2025-04-14_masked_ZS.pdf › Supplementary Material/FindNICE Benchmark/visualizations/confusion_matrices/cm_gpt-4.1-nano-2025-04-14_masked_ZS.pdf]

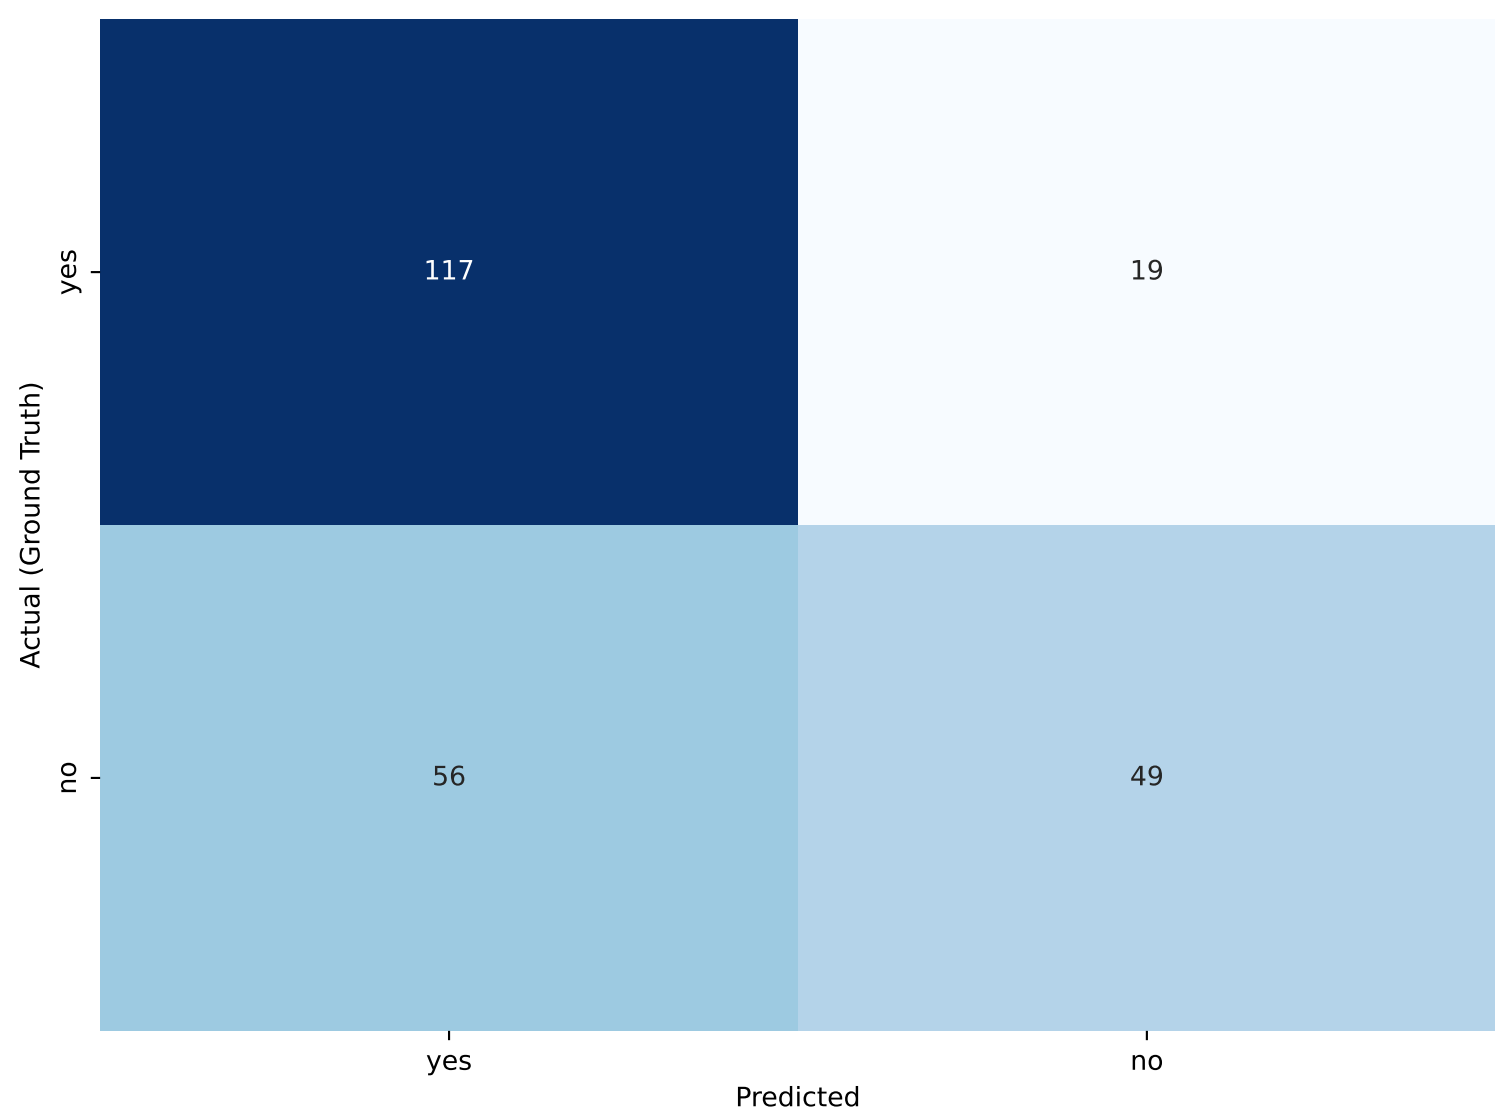

Supplement: supplementary_material [file cm_gpt-4.1-nano-2025-04-14_obfuscated_COT.pdf › Supplementary Material/FindNICE Benchmark/visualizations/confusion_matrices/cm_gpt-4.1-nano-2025-04-14_obfuscated_COT.pdf]

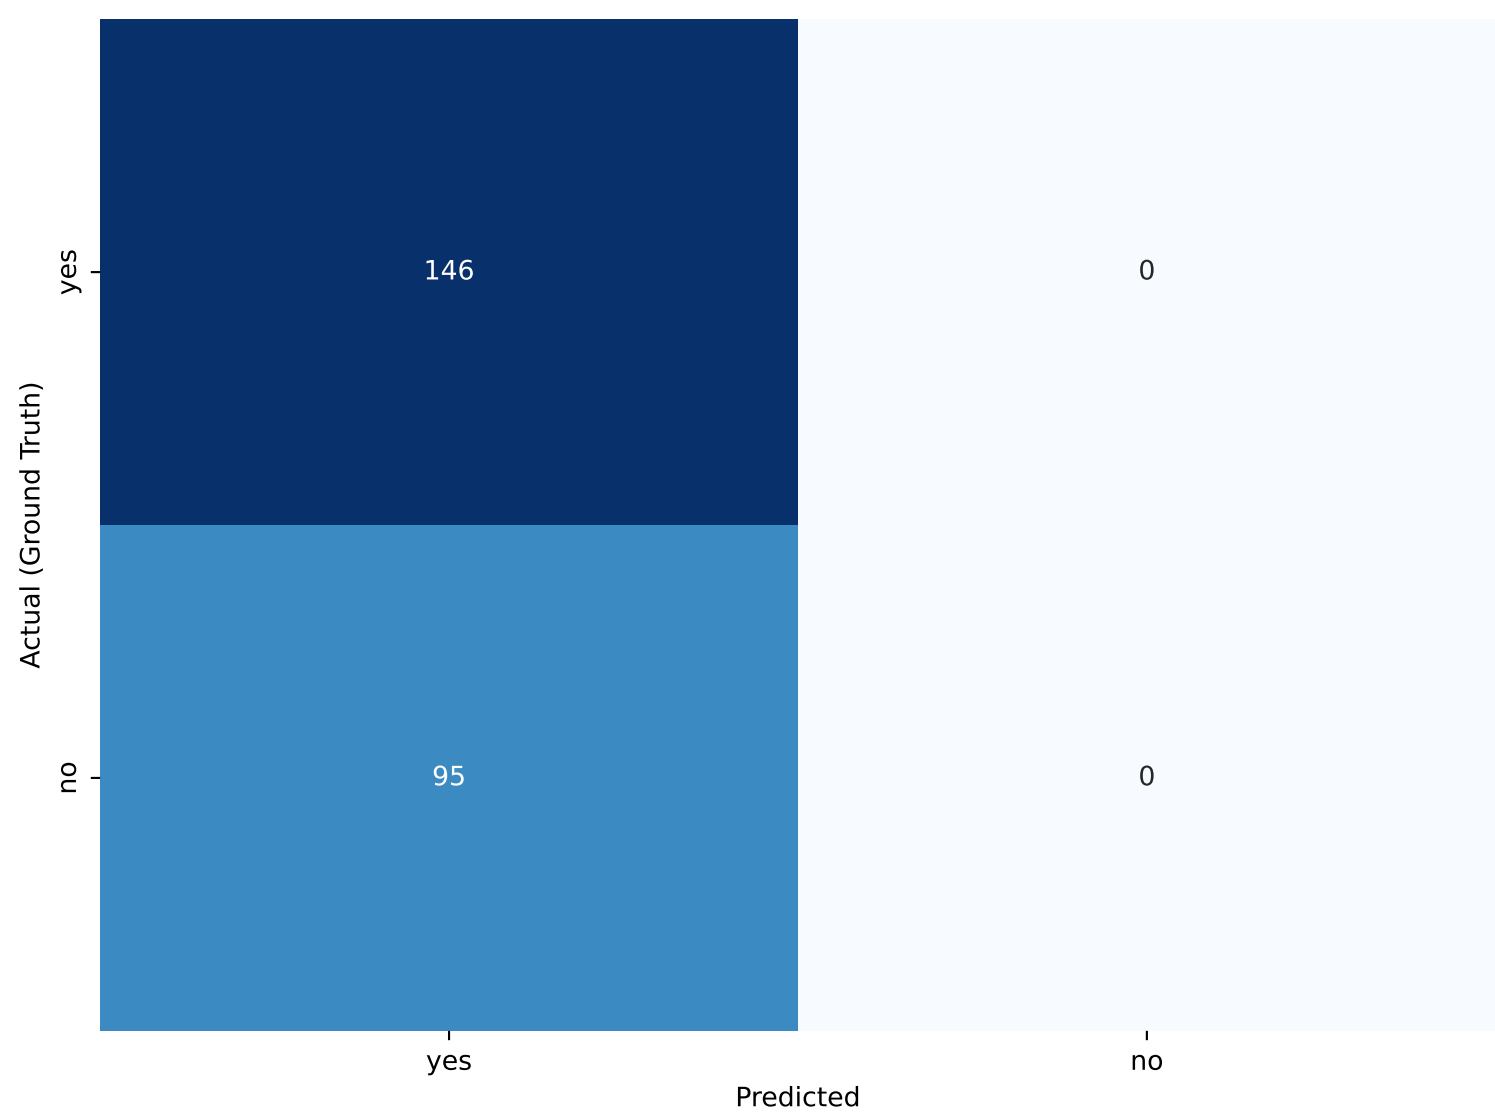

Supplement: supplementary_material [file cm_gpt-4.1-nano-2025-04-14_obfuscated_ZS.pdf › Supplementary Material/FindNICE Benchmark/visualizations/confusion_matrices/cm_gpt-4.1-nano-2025-04-14_obfuscated_ZS.pdf]

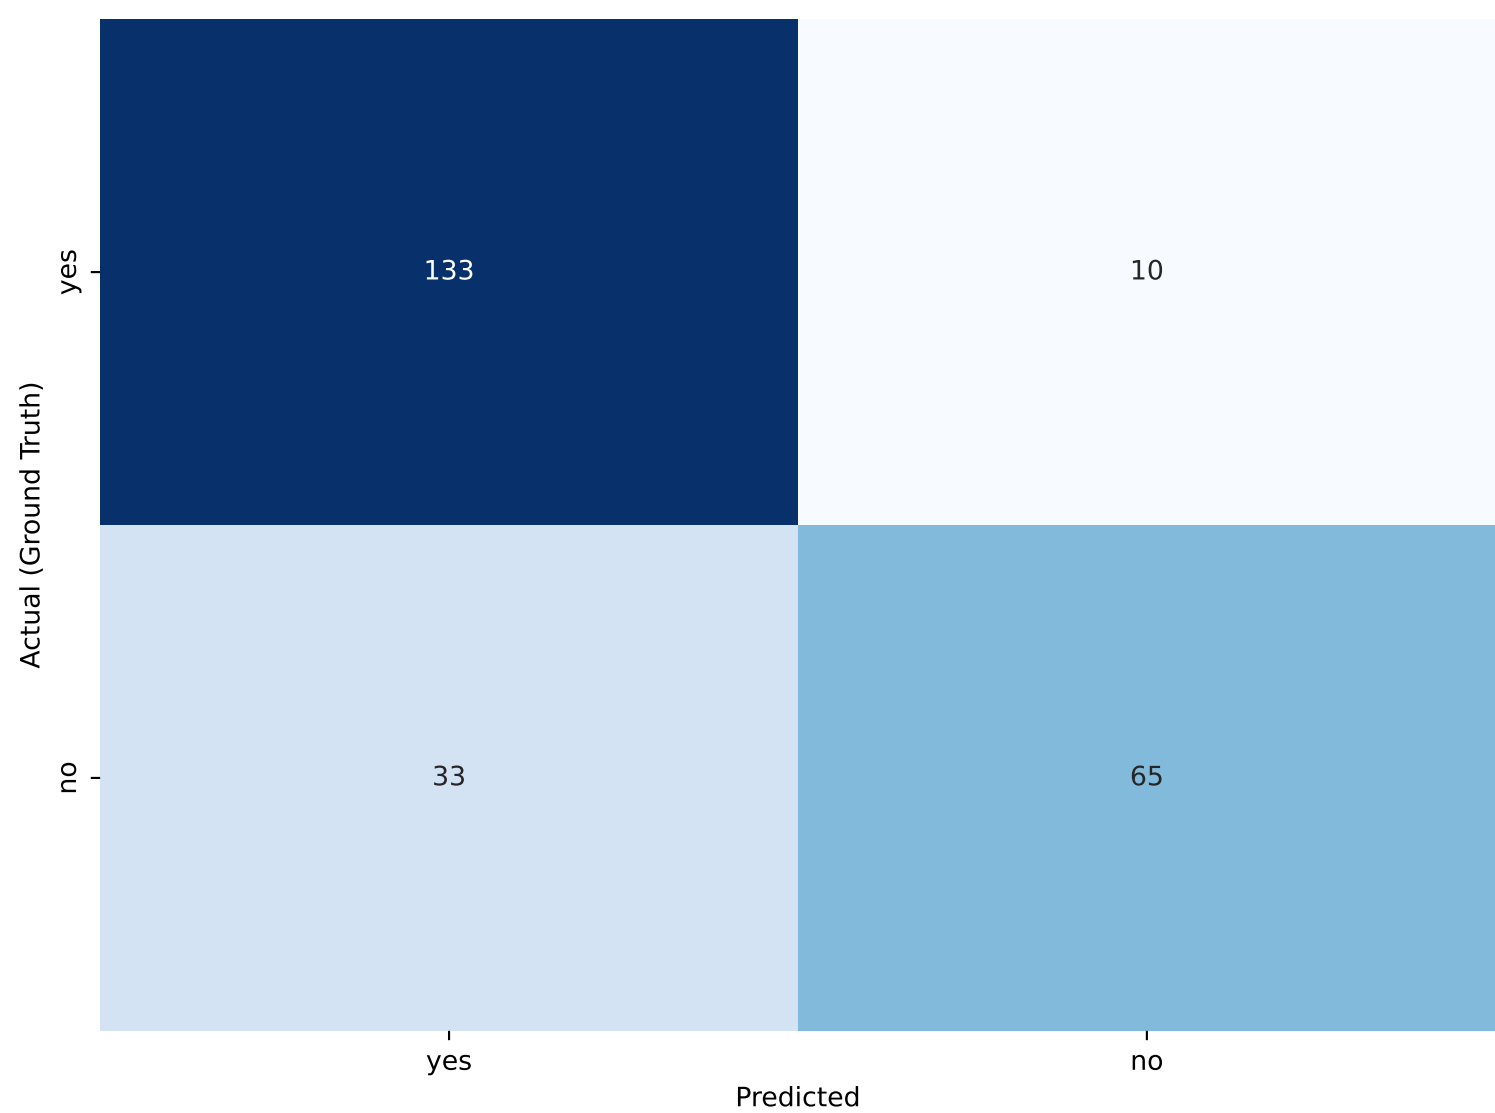

Supplement: supplementary_material [file cm_gpt-4.1-nano-2025-04-14_unmasked_COT.pdf › Supplementary Material/FindNICE Benchmark/visualizations/confusion_matrices/cm_gpt-4.1-nano-2025-04-14_unmasked_COT.pdf]

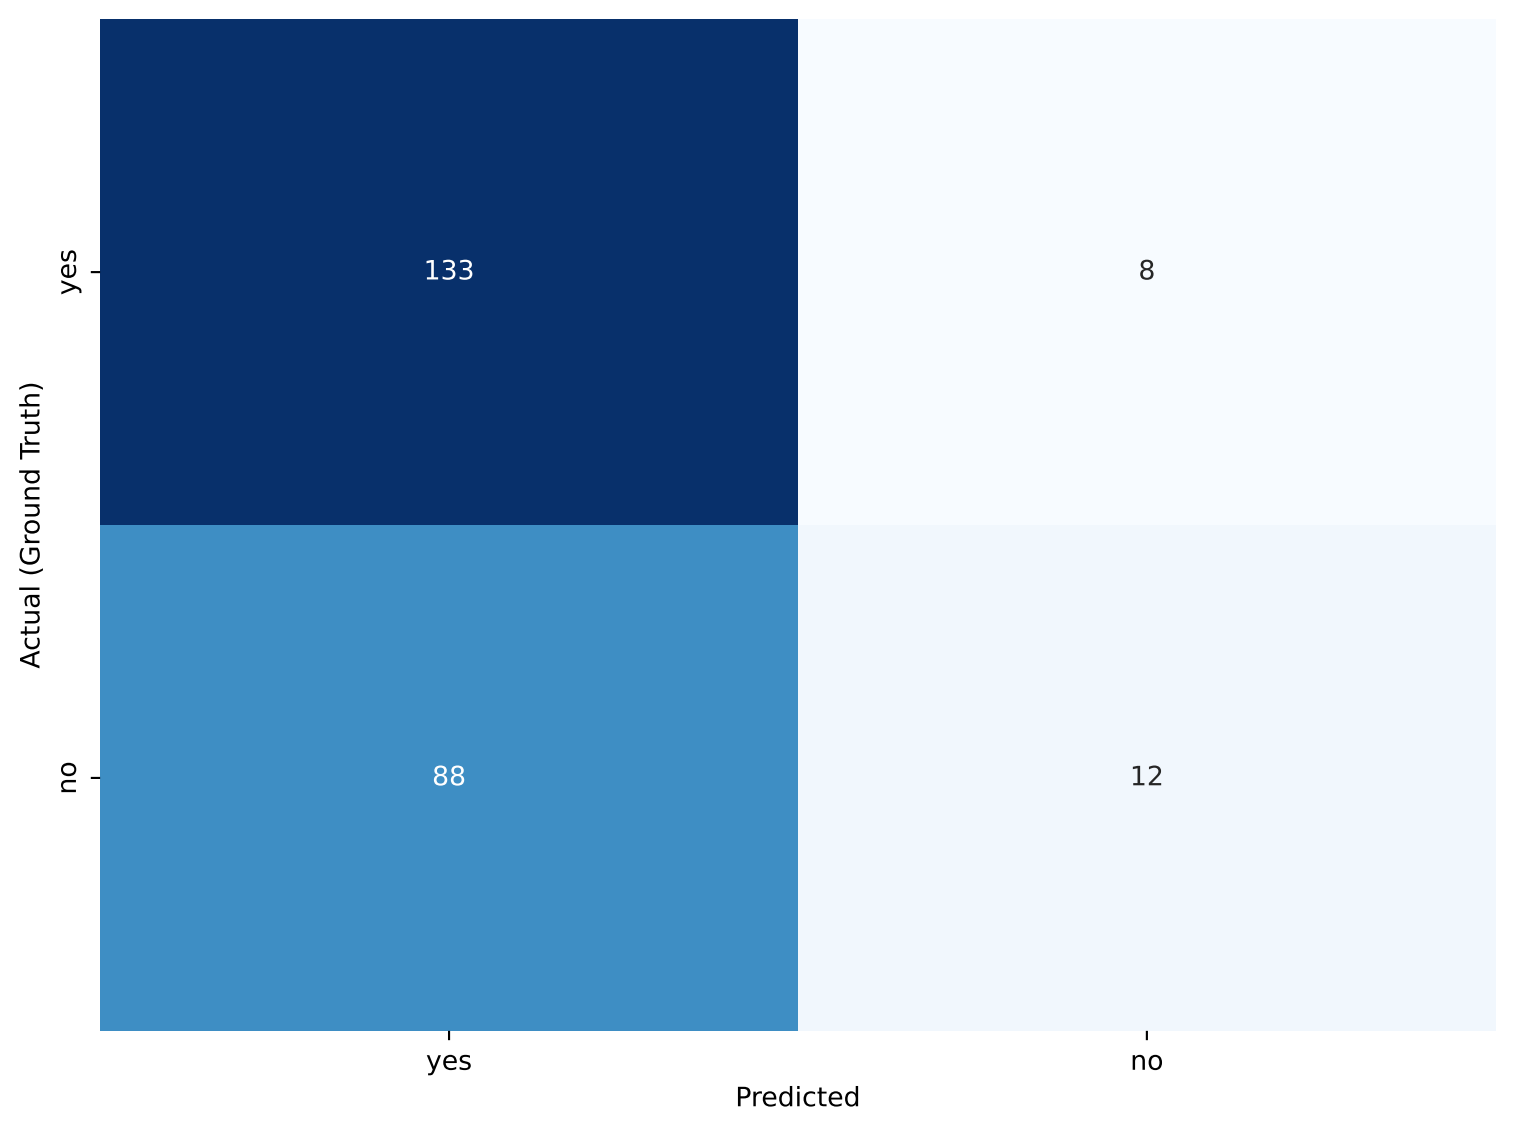

Supplement: supplementary_material [file cm_gpt-4.1-nano-2025-04-14_unmasked_ZS.pdf › Supplementary Material/FindNICE Benchmark/visualizations/confusion_matrices/cm_gpt-4.1-nano-2025-04-14_unmasked_ZS.pdf]

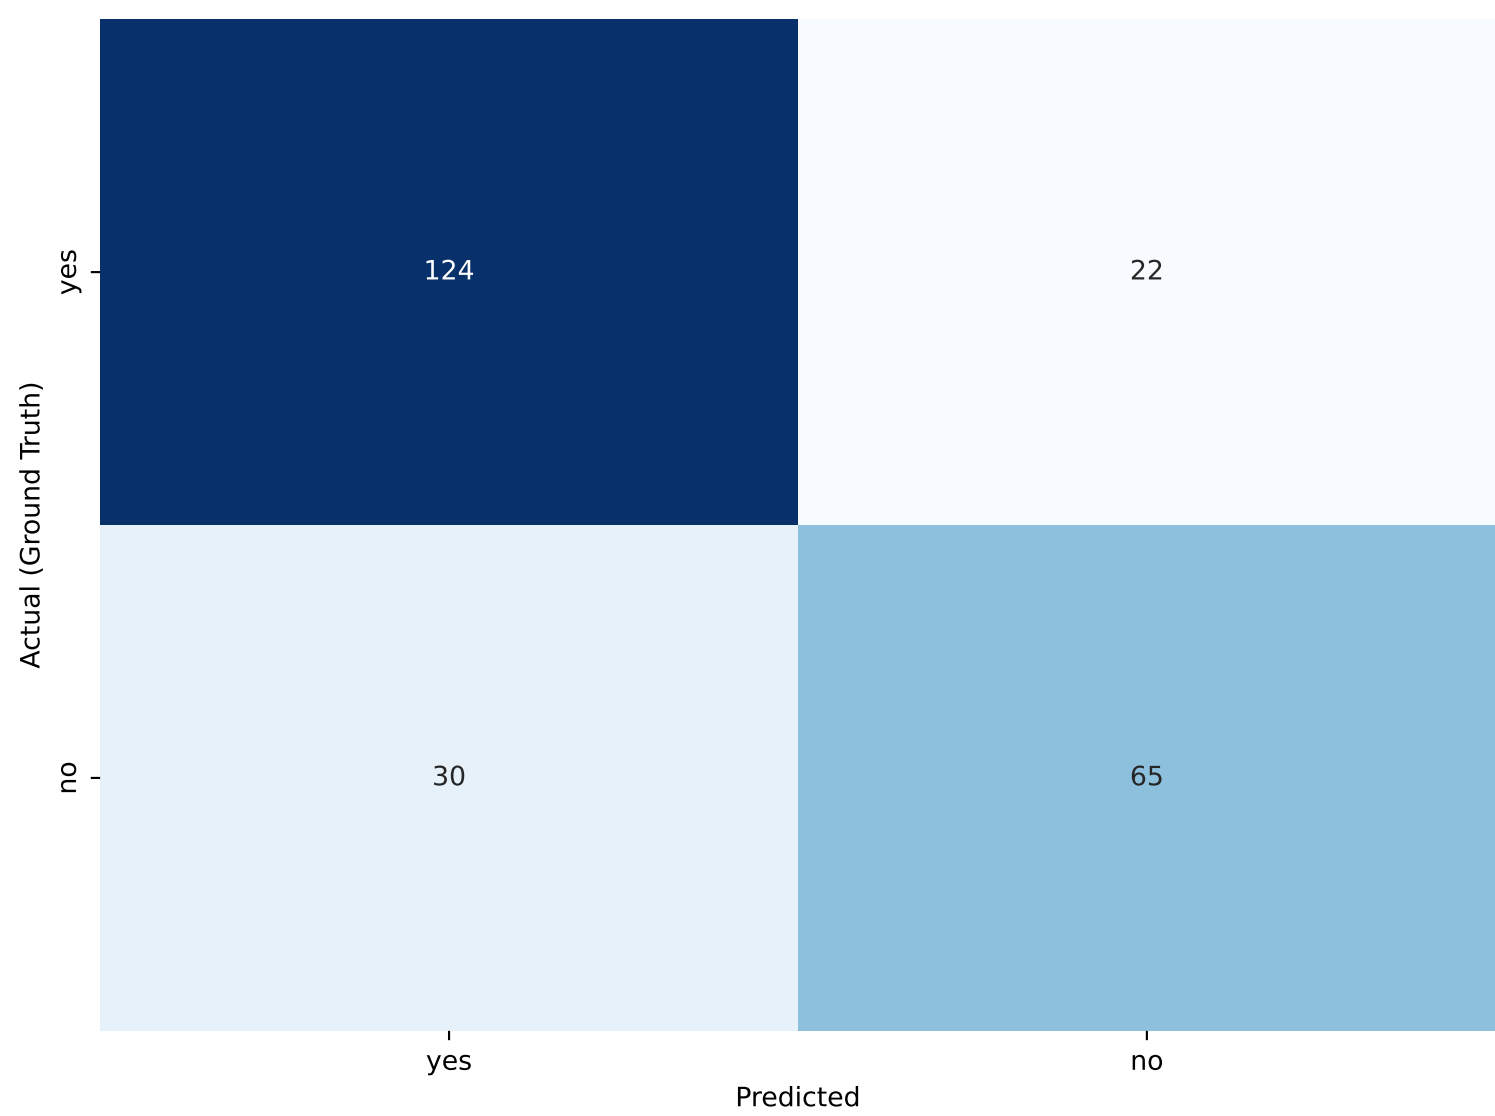

Supplement: supplementary_material [file cm_gpt-4o-mini-2024-07-18_masked_COT.pdf › Supplementary Material/FindNICE Benchmark/visualizations/confusion_matrices/cm_gpt-4o-mini-2024-07-18_masked_COT.pdf]

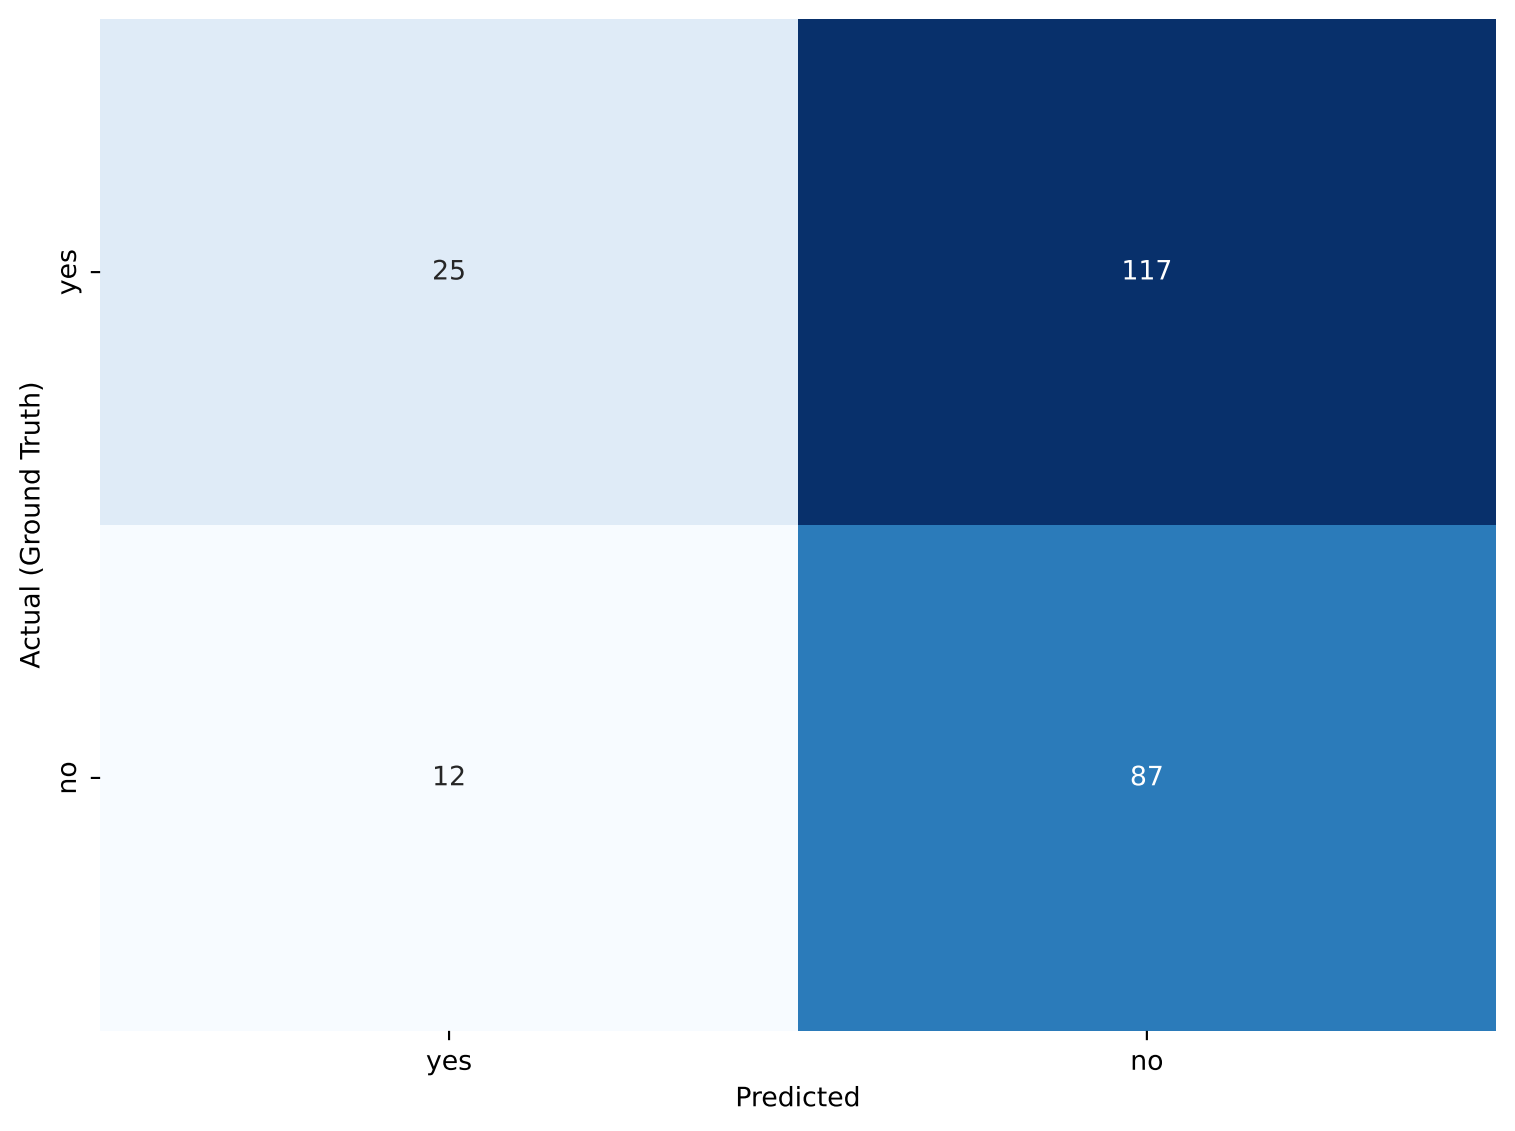

Supplement: supplementary_material [file cm_gpt-4o-mini-2024-07-18_masked_ZS.pdf › Supplementary Material/FindNICE Benchmark/visualizations/confusion_matrices/cm_gpt-4o-mini-2024-07-18_masked_ZS.pdf]

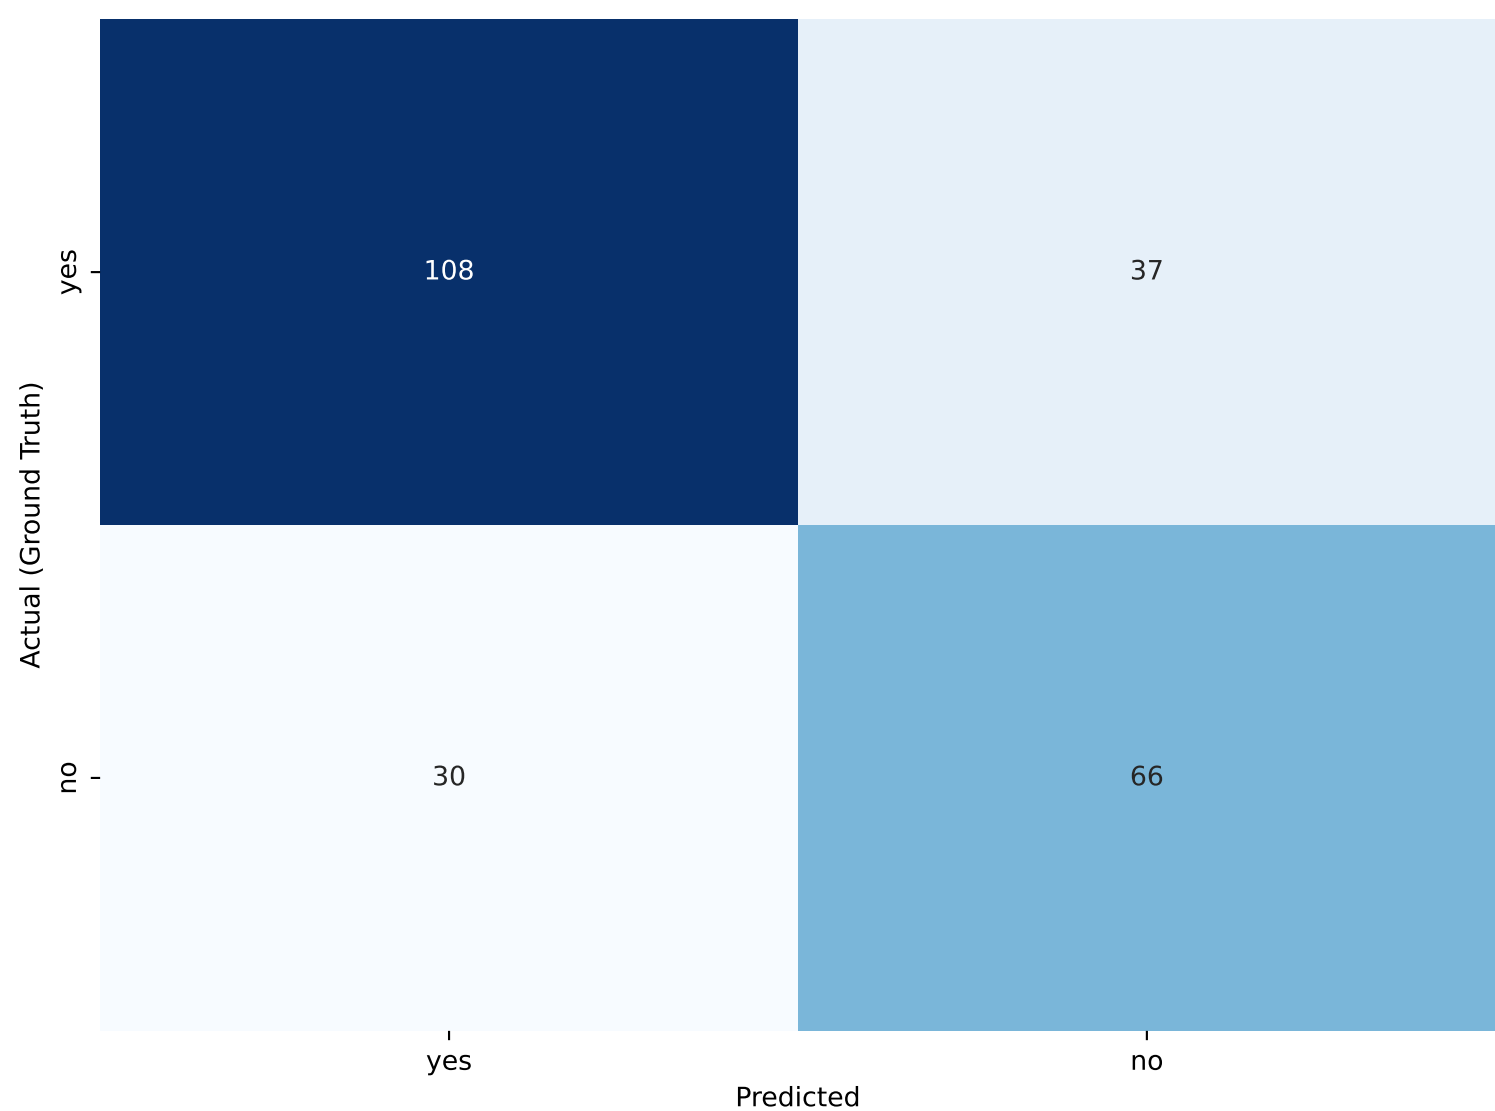

Supplement: supplementary_material [file cm_gpt-4o-mini-2024-07-18_obfuscated_COT.pdf › Supplementary Material/FindNICE Benchmark/visualizations/confusion_matrices/cm_gpt-4o-mini-2024-07-18_obfuscated_COT.pdf]

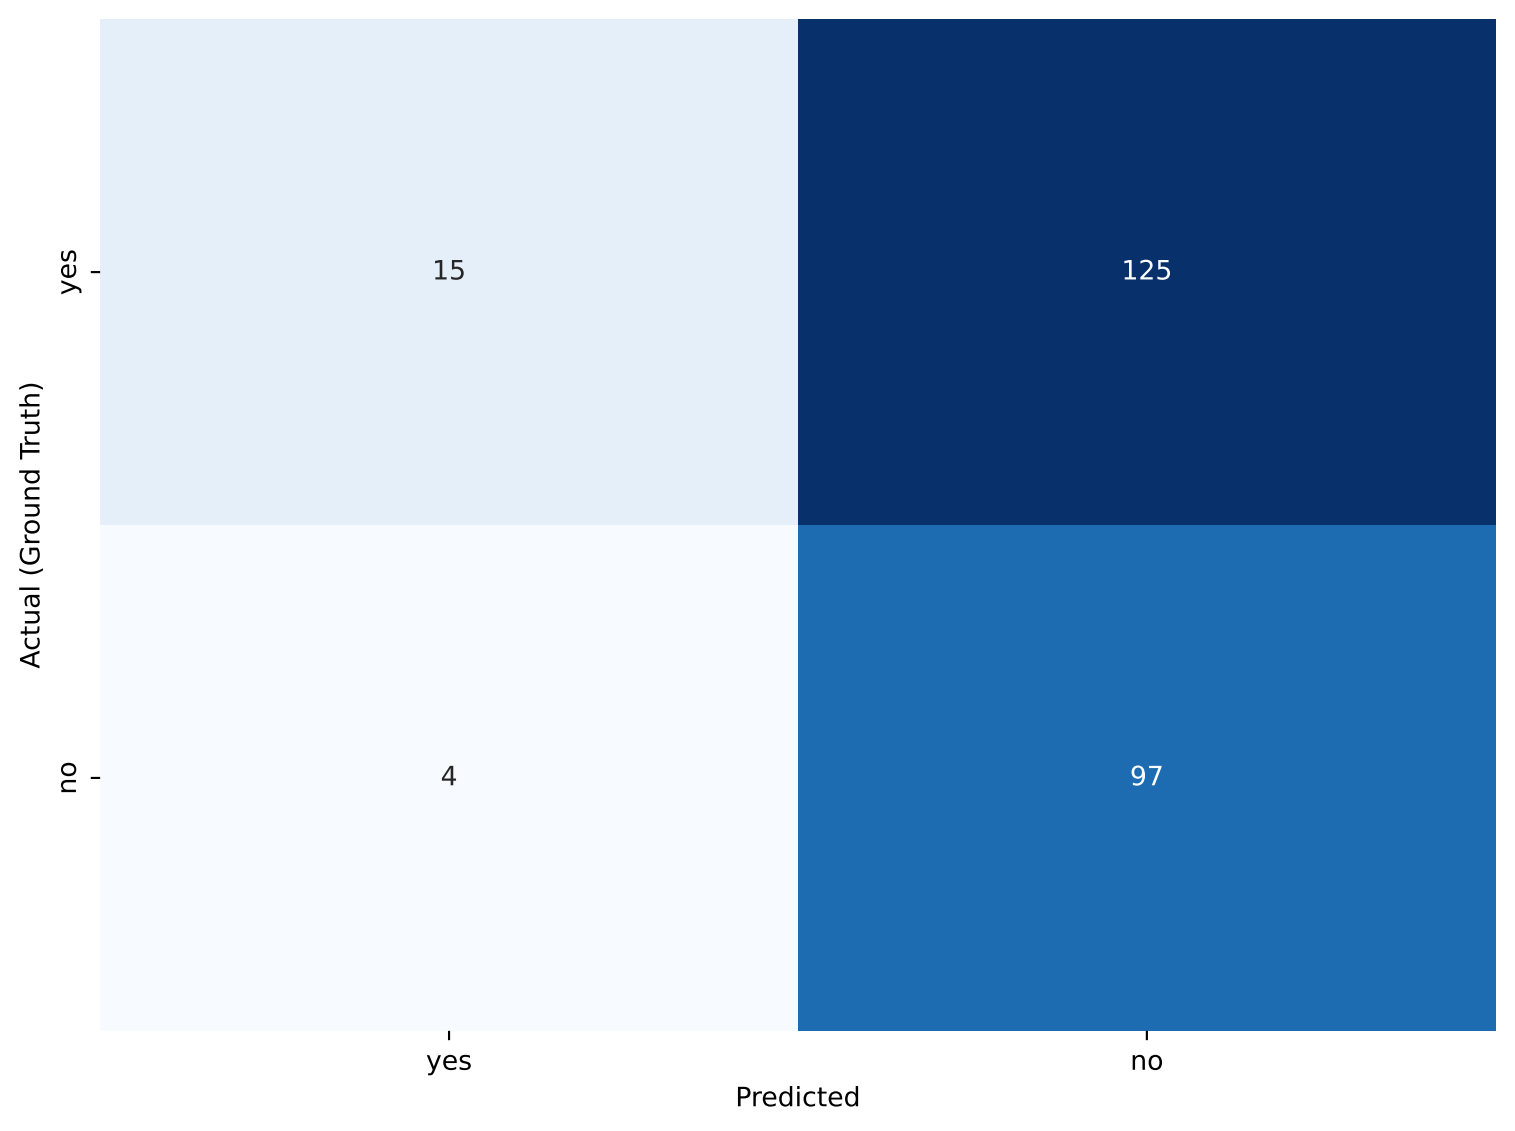

Supplement: supplementary_material [file cm_gpt-4o-mini-2024-07-18_obfuscated_ZS.pdf › Supplementary Material/FindNICE Benchmark/visualizations/confusion_matrices/cm_gpt-4o-mini-2024-07-18_obfuscated_ZS.pdf]

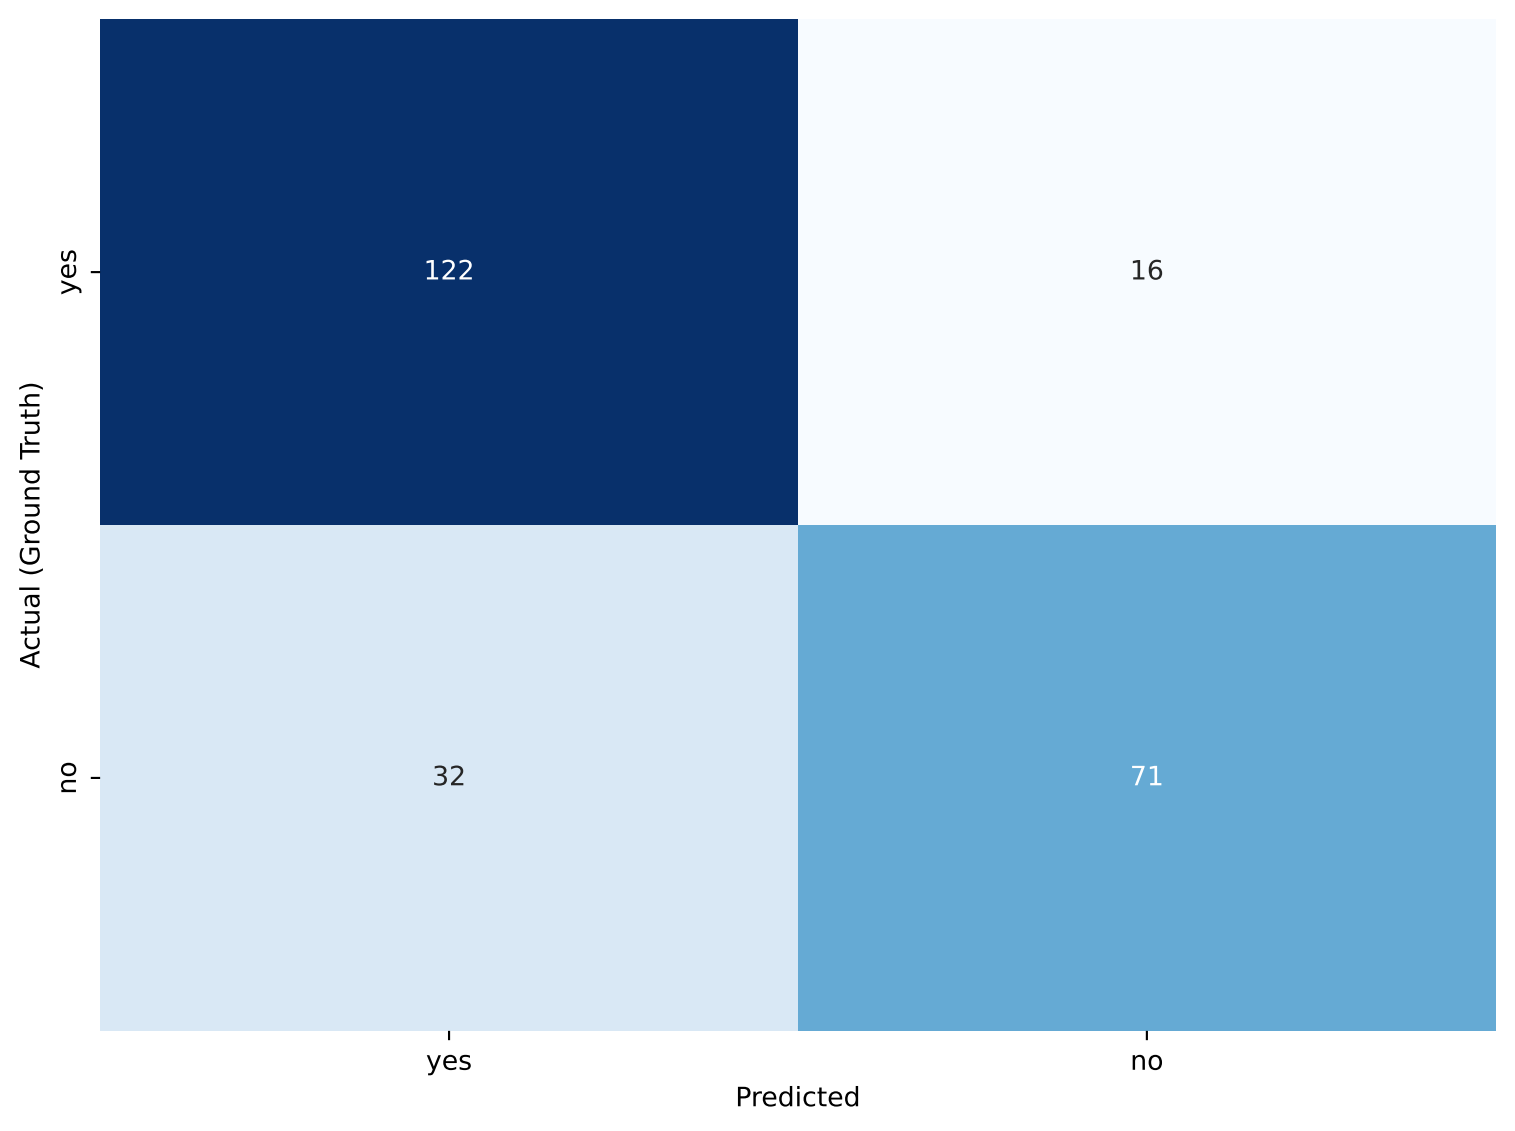

Supplement: supplementary_material [file cm_gpt-4o-mini-2024-07-18_unmasked_COT.pdf › Supplementary Material/FindNICE Benchmark/visualizations/confusion_matrices/cm_gpt-4o-mini-2024-07-18_unmasked_COT.pdf]

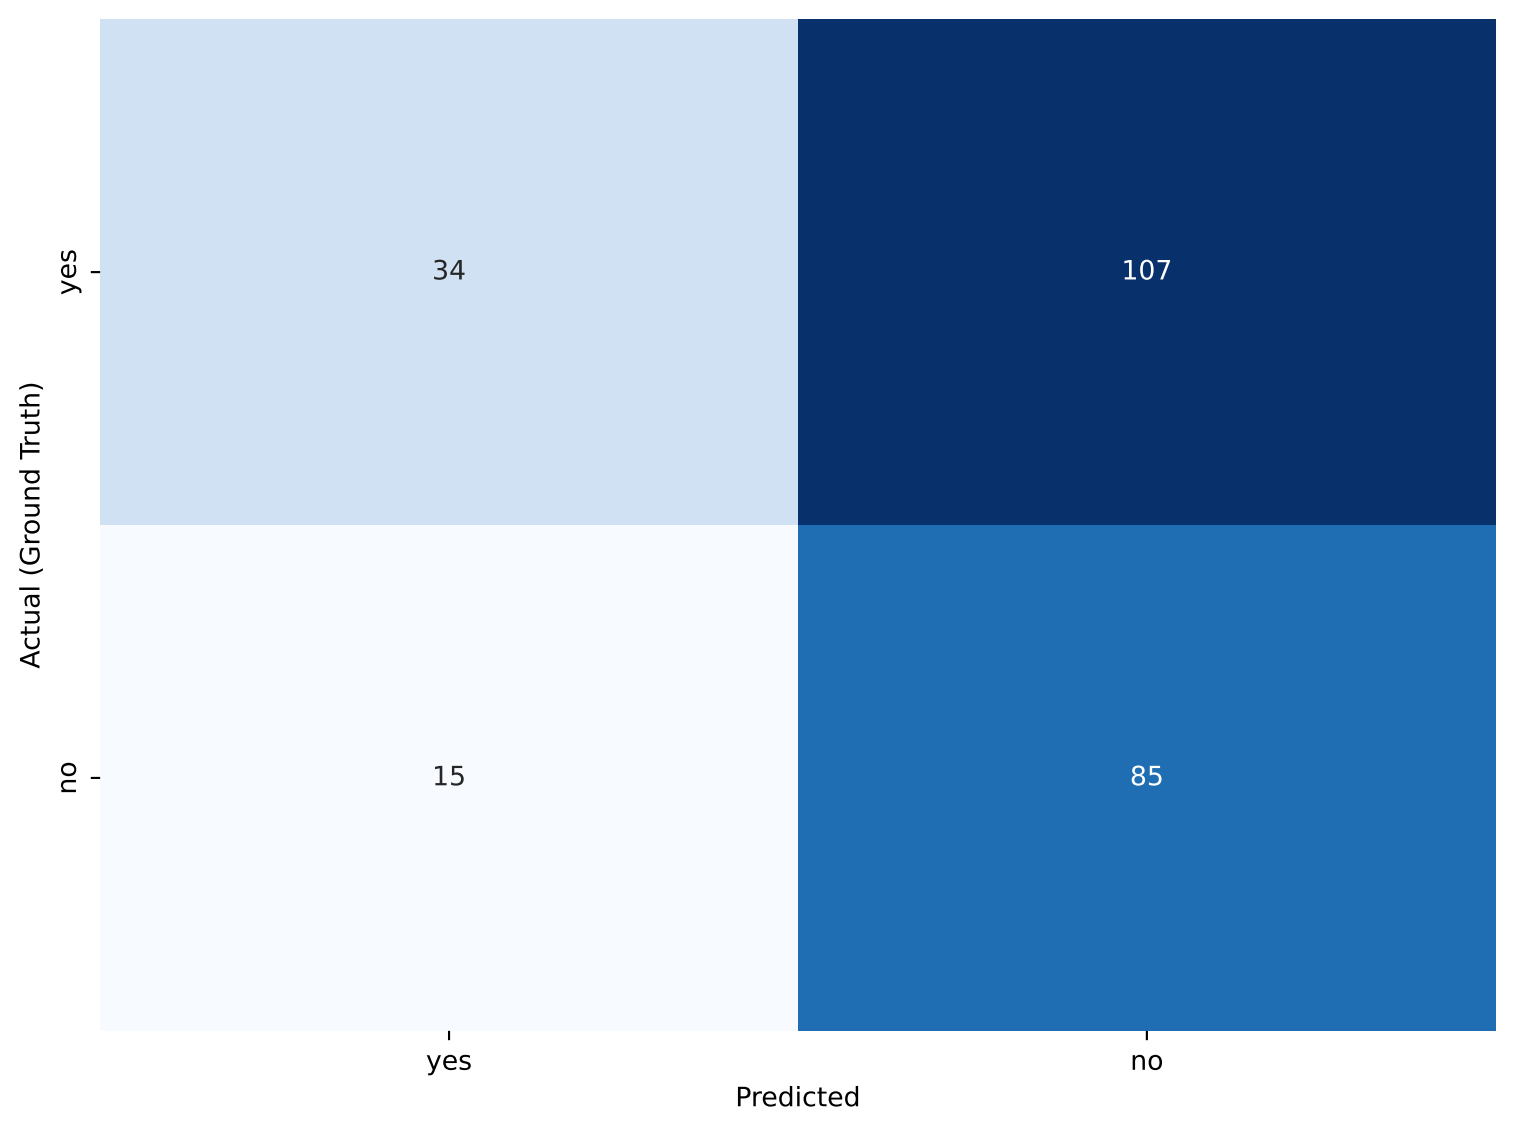

Supplement: supplementary_material [file cm_gpt-4o-mini-2024-07-18_unmasked_ZS.pdf › Supplementary Material/FindNICE Benchmark/visualizations/confusion_matrices/cm_gpt-4o-mini-2024-07-18_unmasked_ZS.pdf]

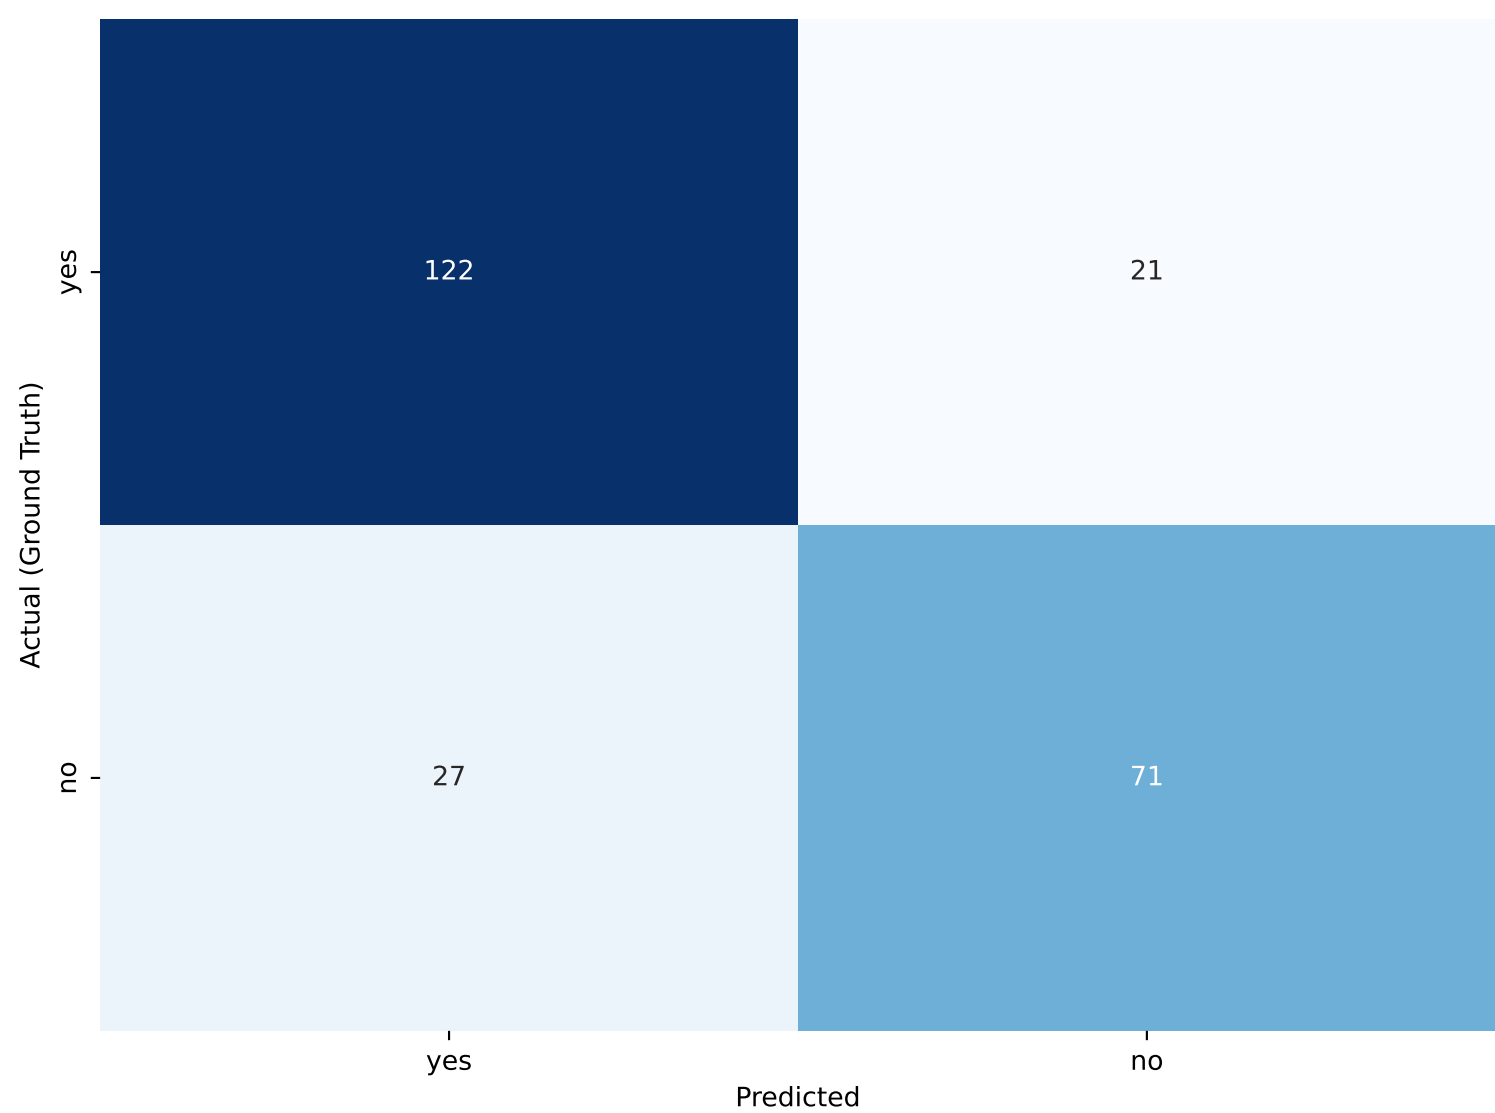

Supplement: supplementary_material [file cm_mistralai_Mistral-Small-24B-Instruct-2501_masked_COT.pdf › Supplementary Material/FindNICE Benchmark/visualizations/confusion_matrices/cm_mistralai_Mistral-Small-24B-Instruct-2501_masked_COT.pdf]

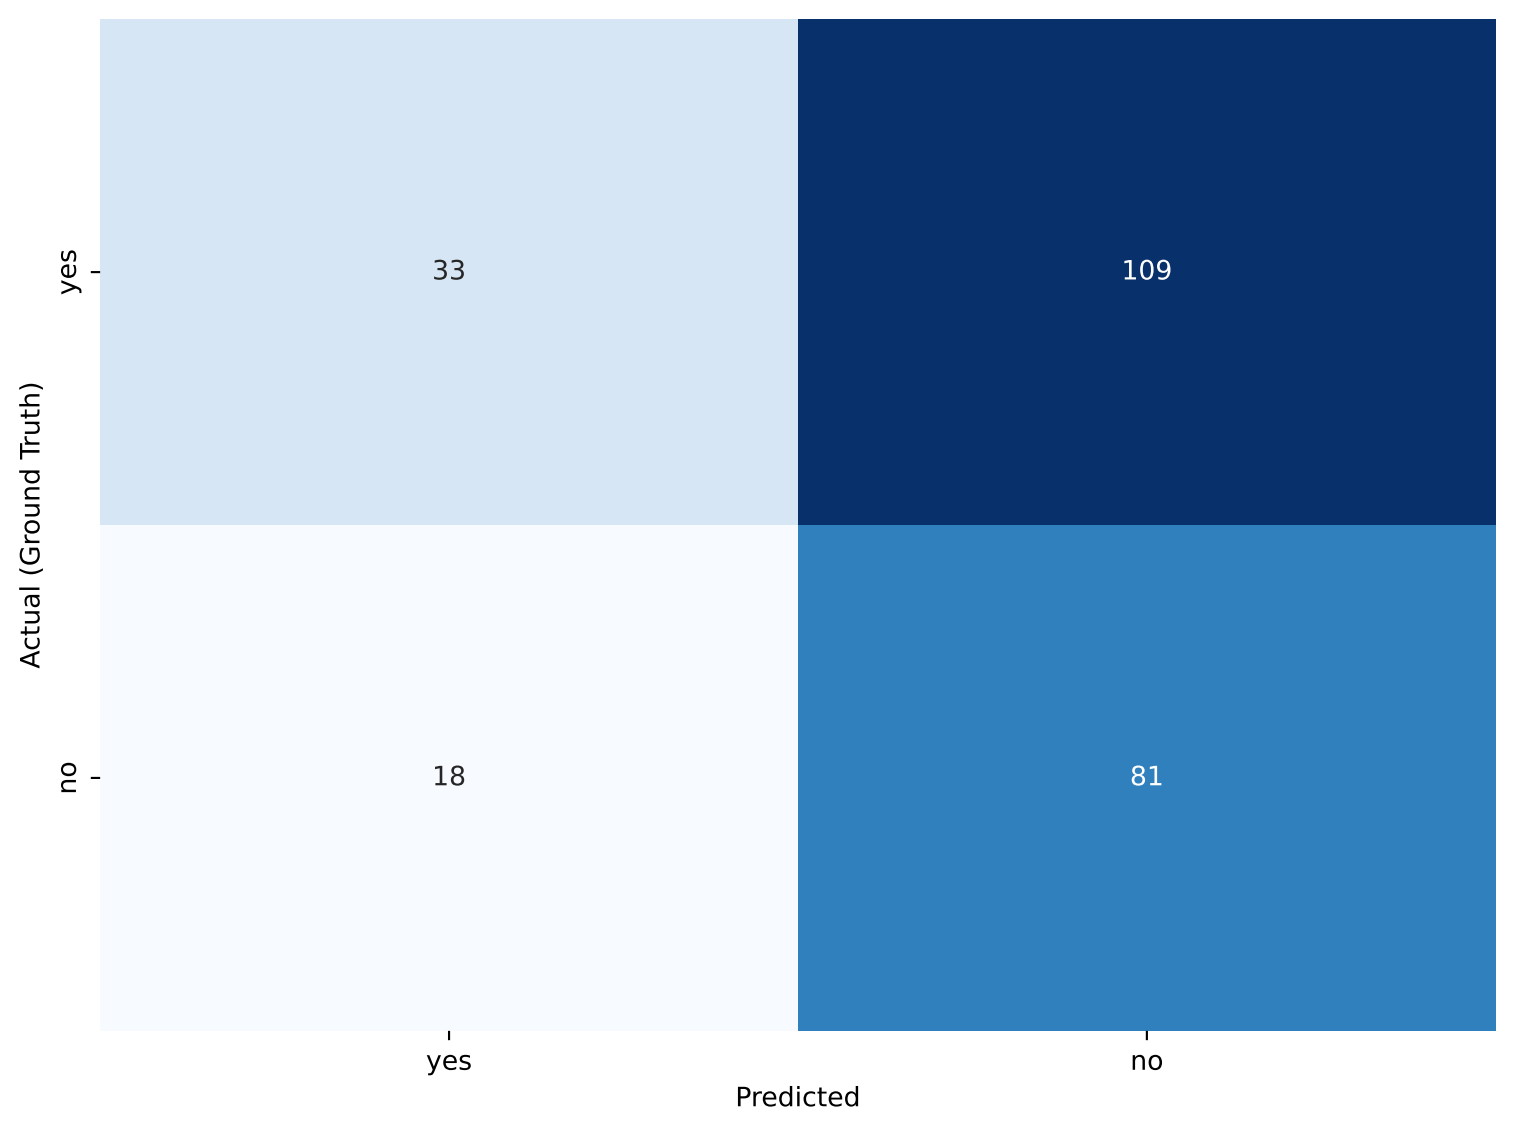

Supplement: supplementary_material [file cm_mistralai_Mistral-Small-24B-Instruct-2501_masked_ZS.pdf › Supplementary Material/FindNICE Benchmark/visualizations/confusion_matrices/cm_mistralai_Mistral-Small-24B-Instruct-2501_masked_ZS.pdf]

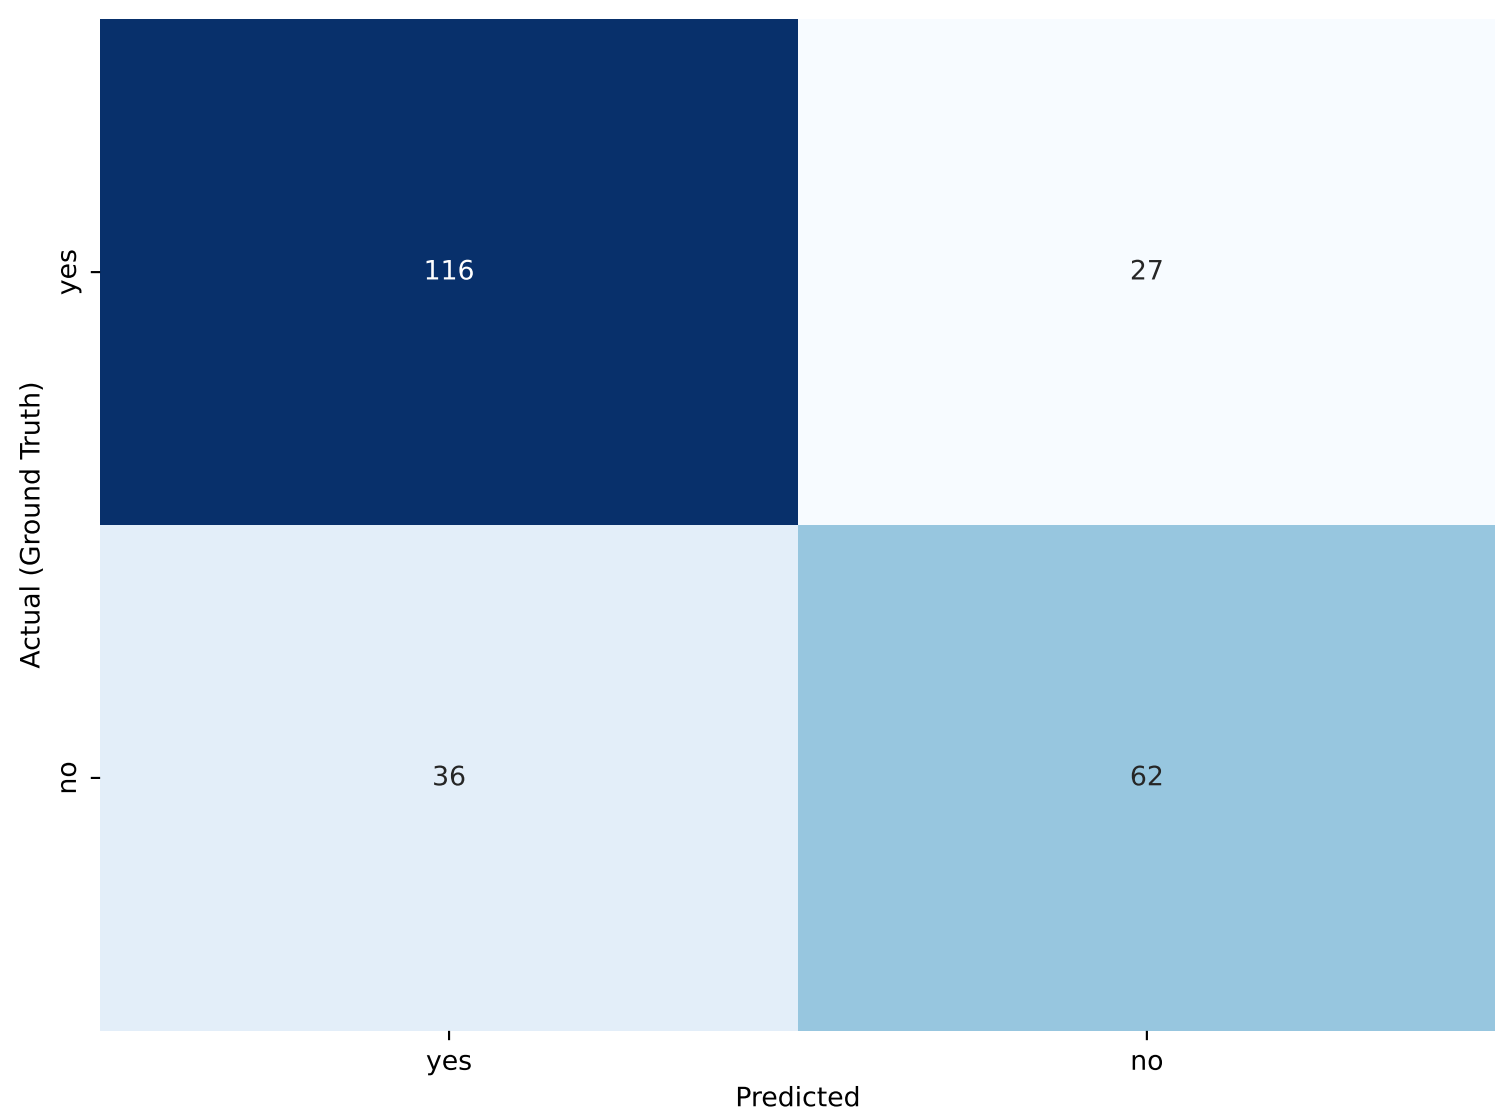

Supplement: supplementary_material [file cm_mistralai_Mistral-Small-24B-Instruct-2501_obfuscated_COT.pdf › Supplementary Material/FindNICE Benchmark/visualizations/confusion_matrices/cm_mistralai_Mistral-Small-24B-Instruct-2501_obfuscated_COT.pdf]

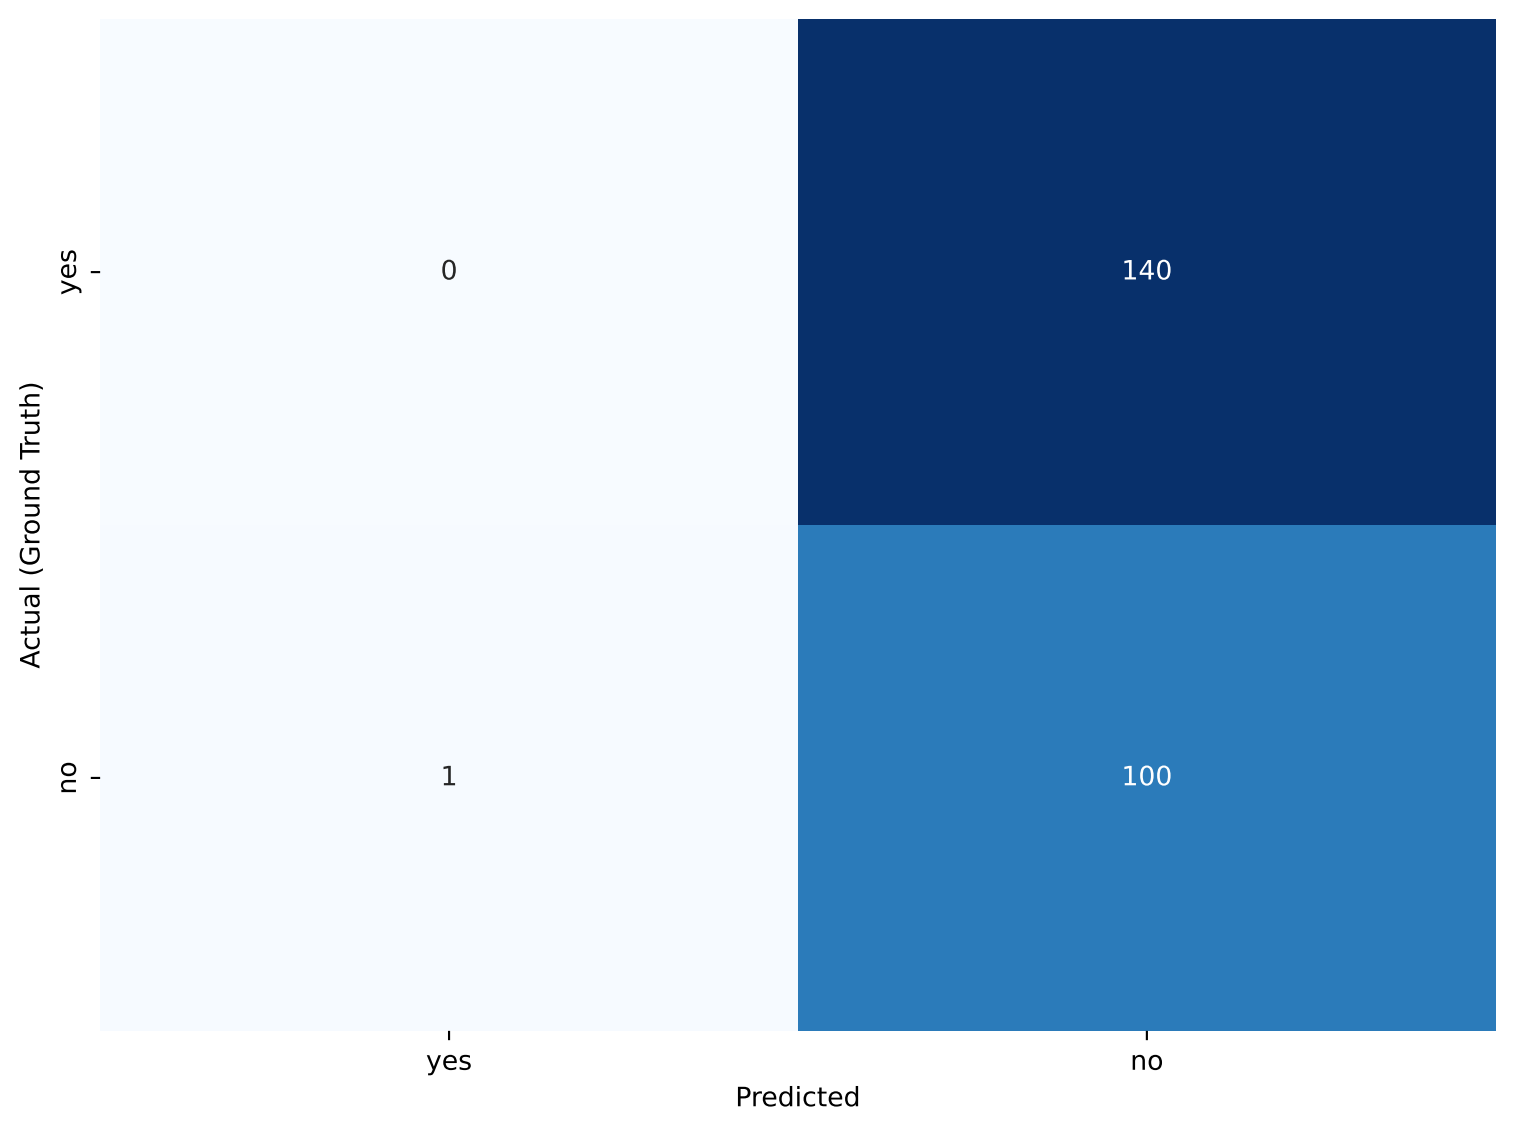

Supplement: supplementary_material [file cm_mistralai_Mistral-Small-24B-Instruct-2501_obfuscated_ZS.pdf › Supplementary Material/FindNICE Benchmark/visualizations/confusion_matrices/cm_mistralai_Mistral-Small-24B-Instruct-2501_obfuscated_ZS.pdf]

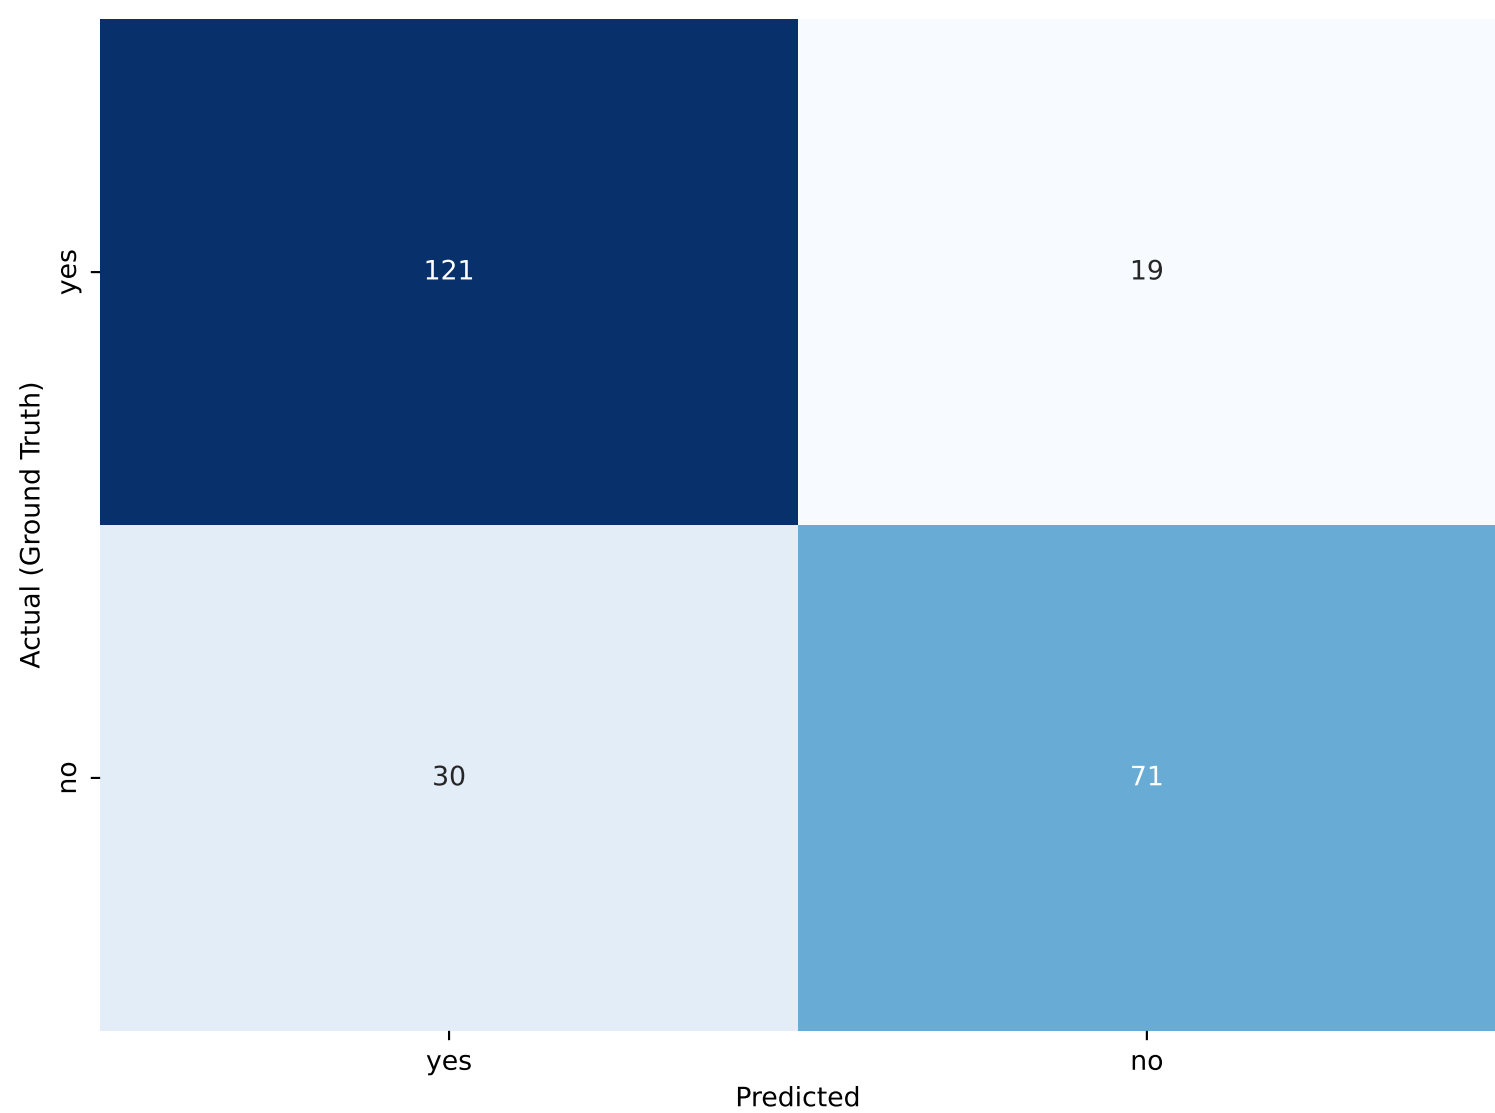

Supplement: supplementary_material [file cm_mistralai_Mistral-Small-24B-Instruct-2501_unmasked_COT.pdf › Supplementary Material/FindNICE Benchmark/visualizations/confusion_matrices/cm_mistralai_Mistral-Small-24B-Instruct-2501_unmasked_COT.pdf]

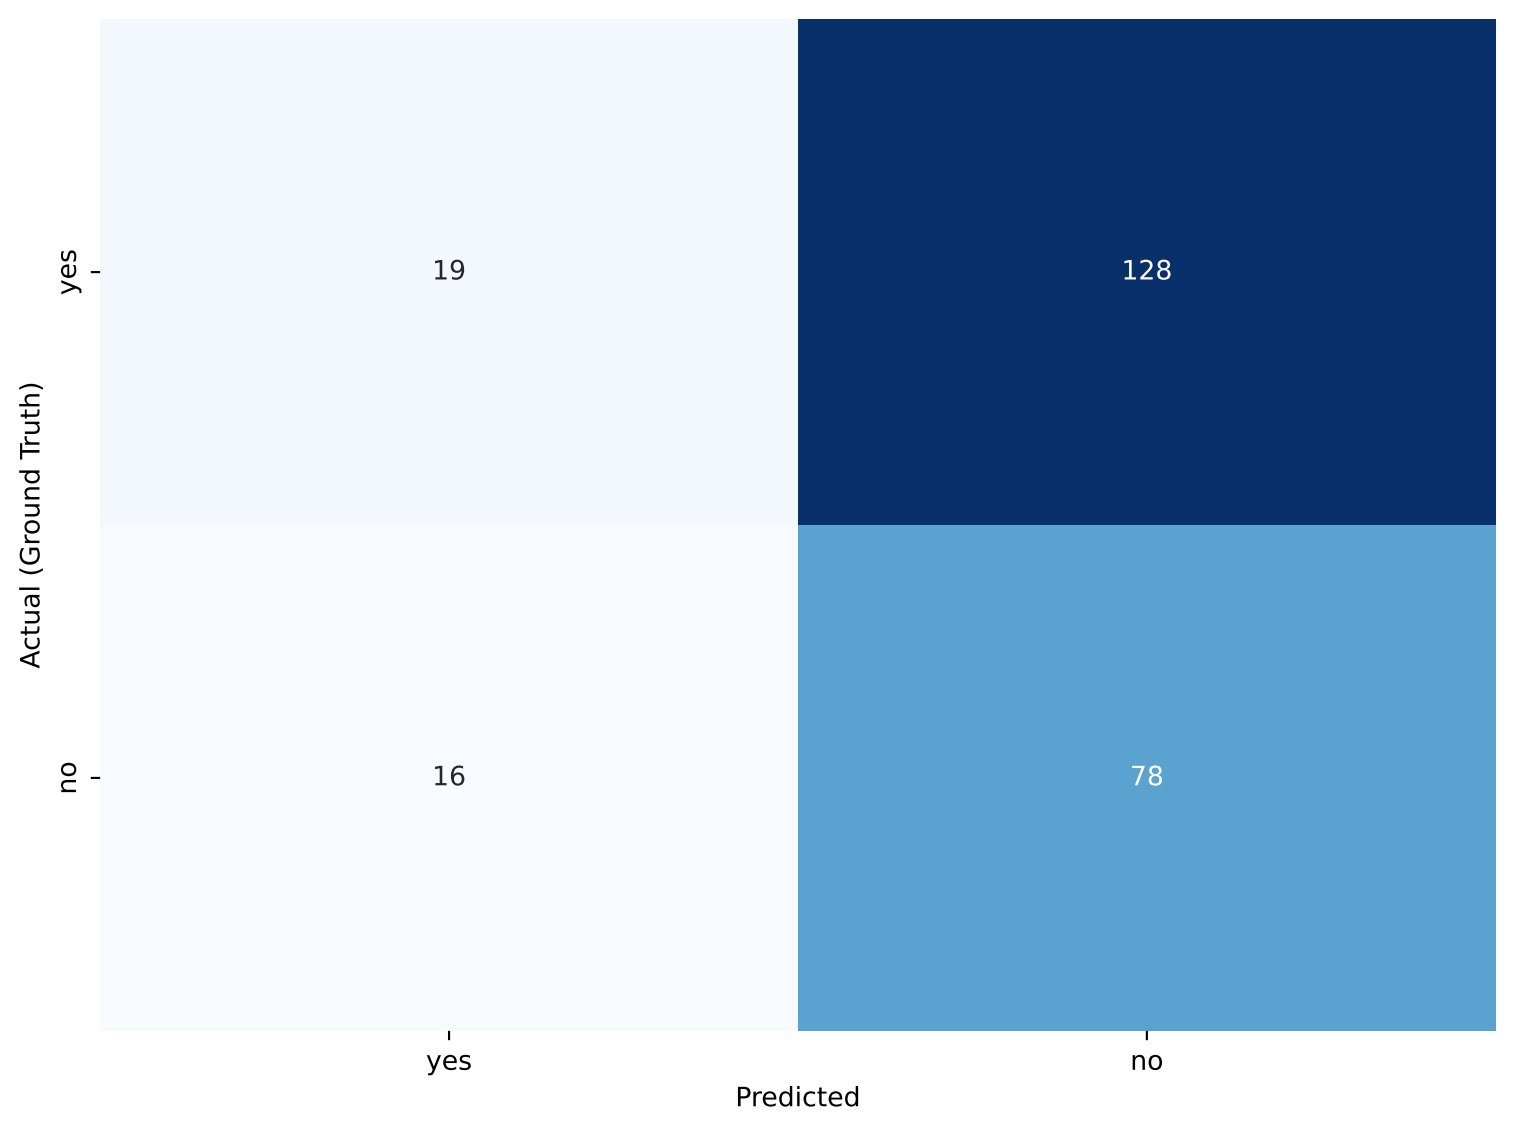

Supplement: supplementary_material [file cm_mistralai_Mistral-Small-24B-Instruct-2501_unmasked_ZS.pdf › Supplementary Material/FindNICE Benchmark/visualizations/confusion_matrices/cm_mistralai_Mistral-Small-24B-Instruct-2501_unmasked_ZS.pdf]

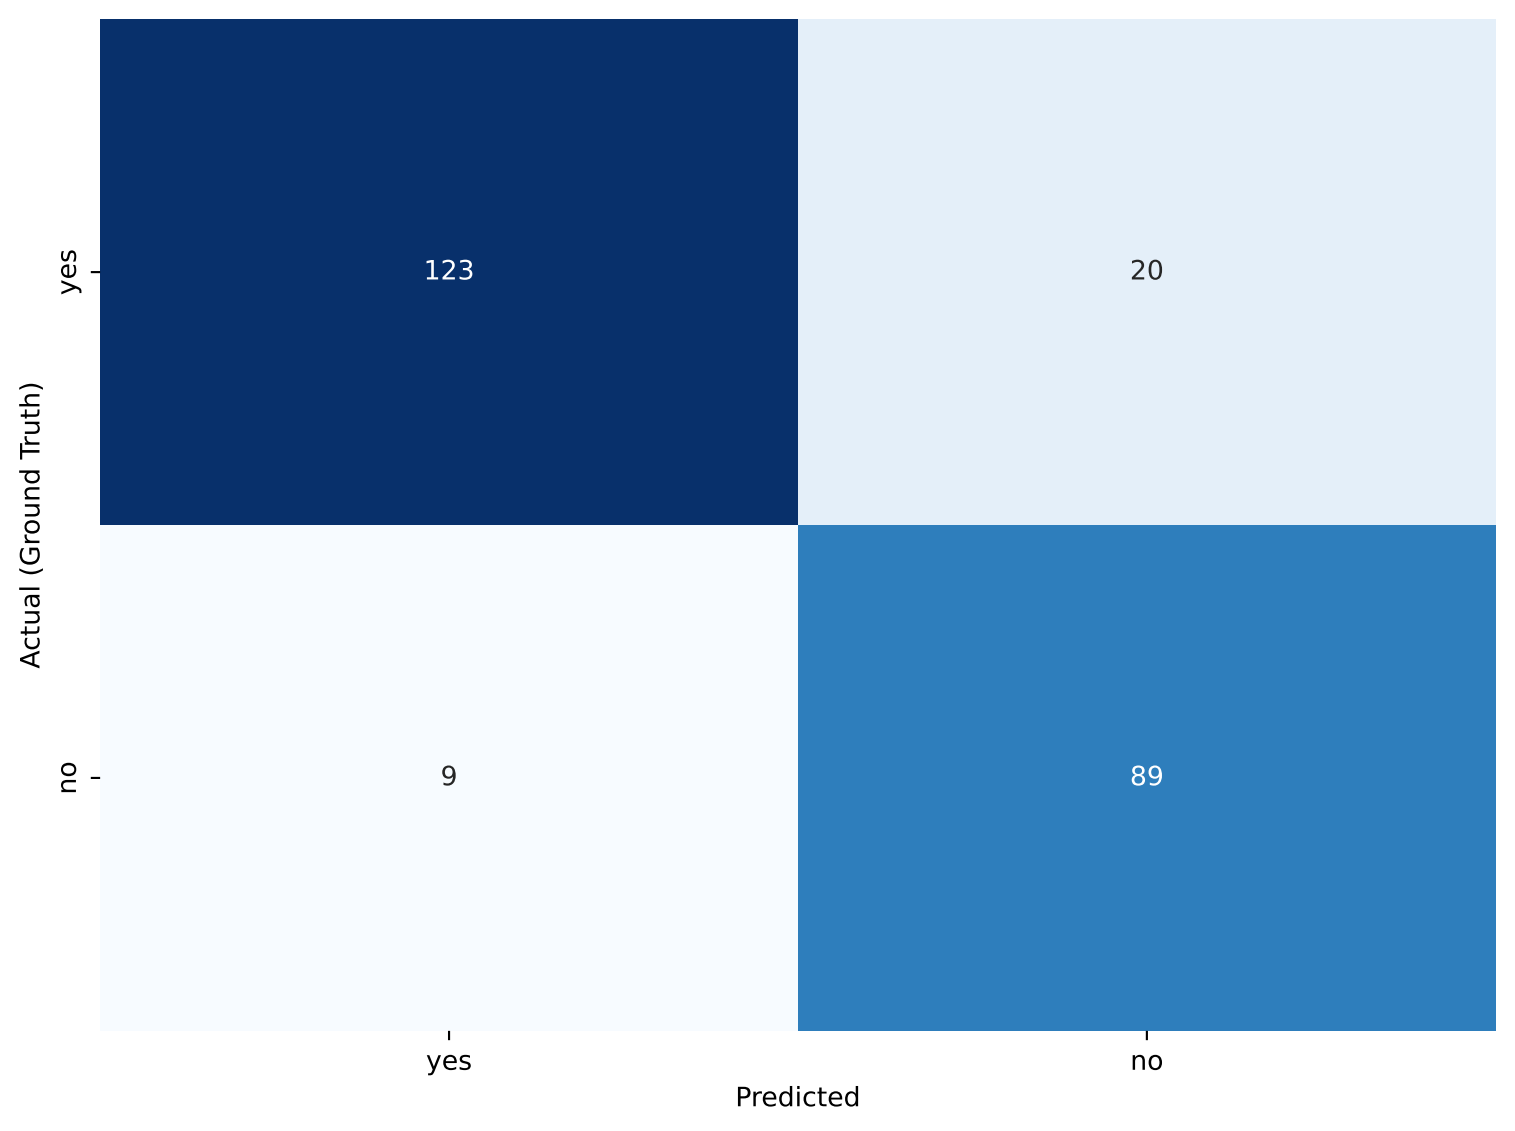

Supplement: supplementary_material [file cm_o4-mini-2025-04-16_masked_ZS.pdf › Supplementary Material/FindNICE Benchmark/visualizations/confusion_matrices/cm_o4-mini-2025-04-16_masked_ZS.pdf]

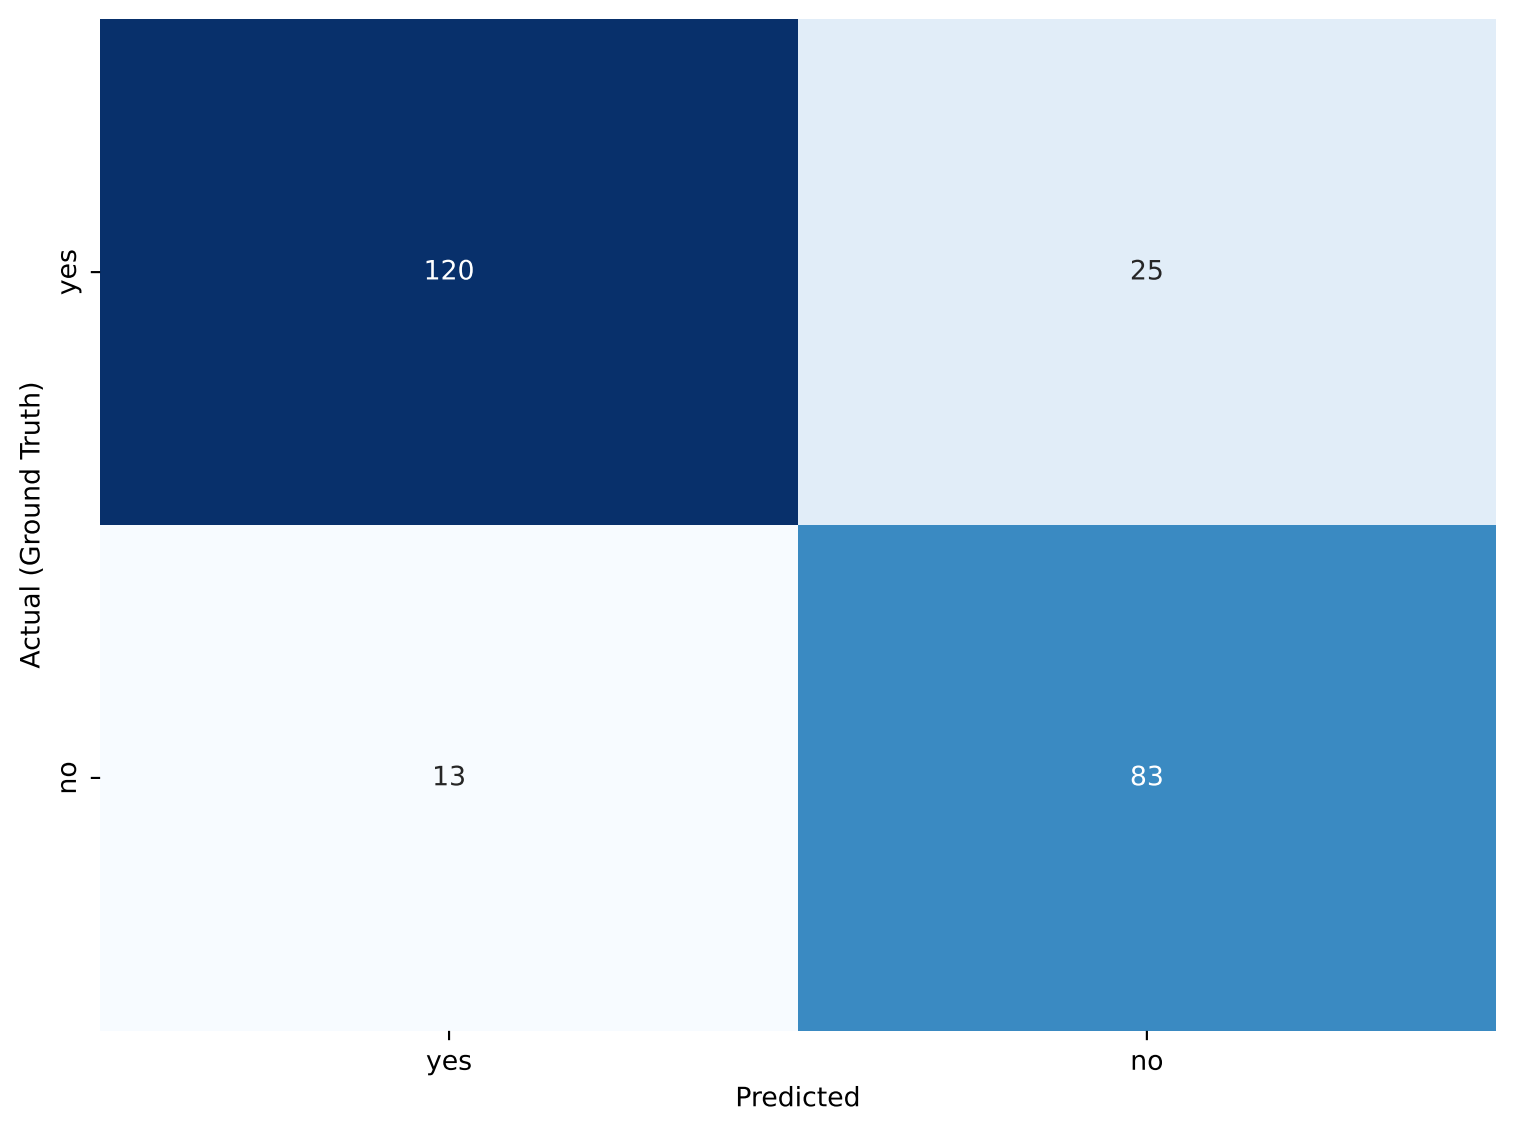

Supplement: supplementary_material [file cm_o4-mini-2025-04-16_obfuscated_ZS.pdf › Supplementary Material/FindNICE Benchmark/visualizations/confusion_matrices/cm_o4-mini-2025-04-16_obfuscated_ZS.pdf]

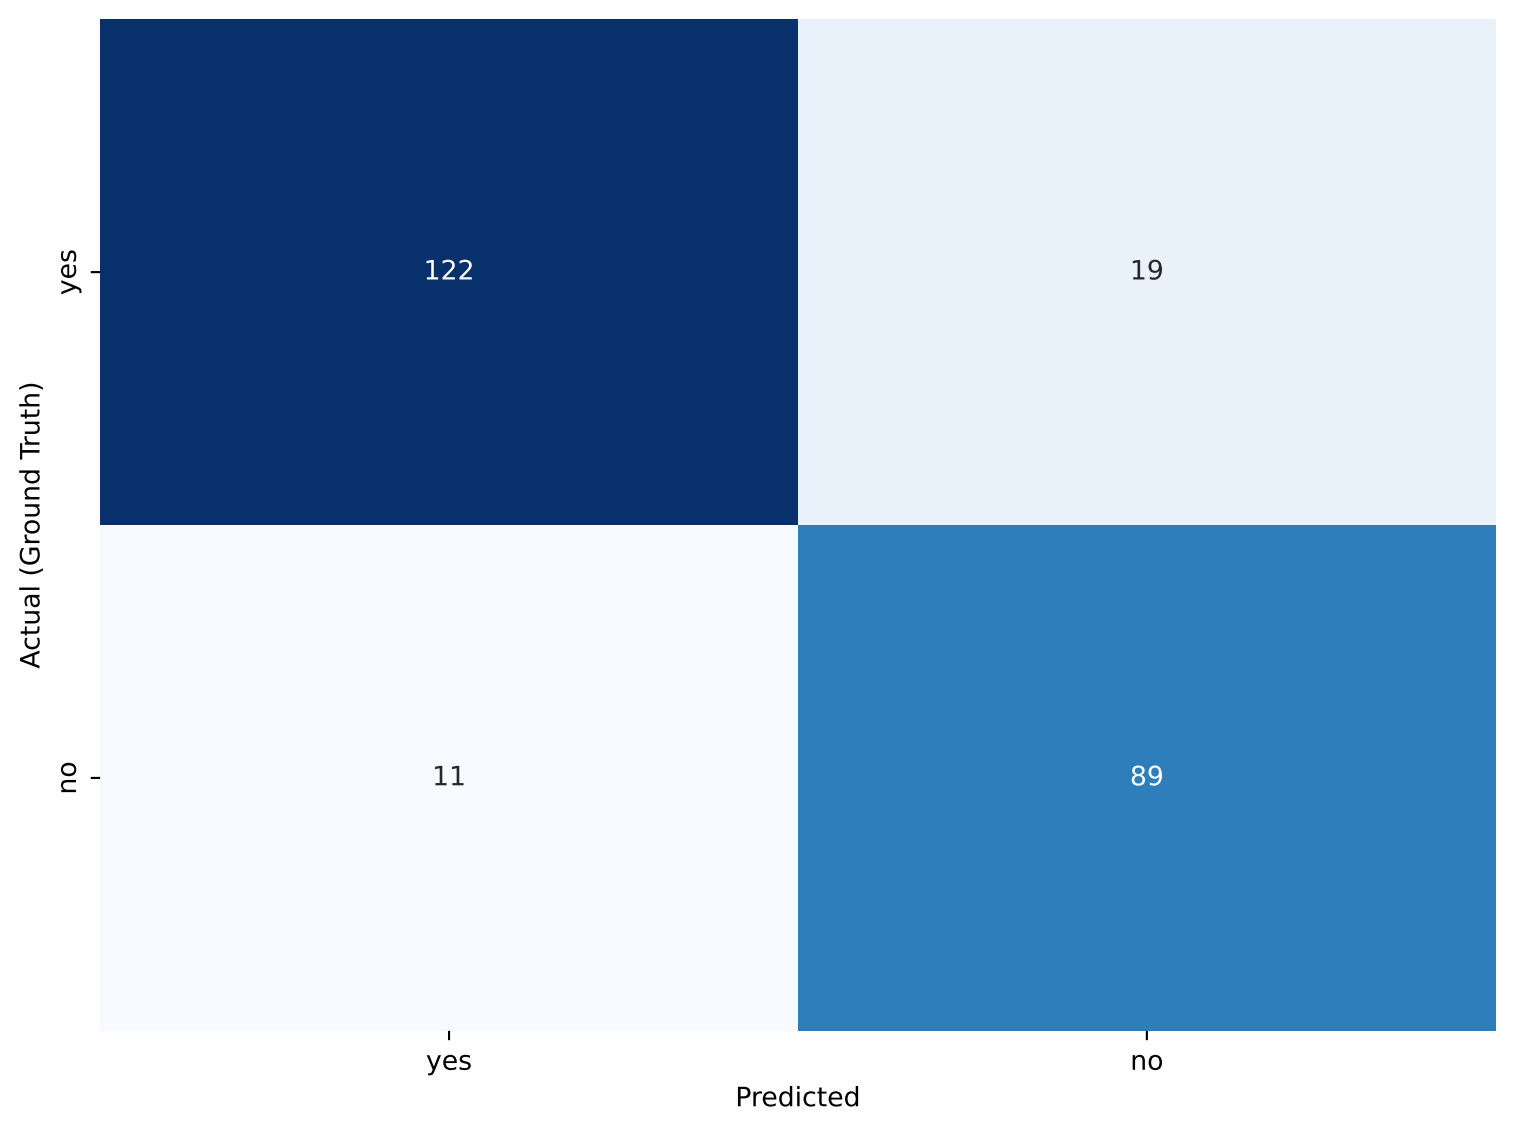

Supplement: supplementary_material [file cm_o4-mini-2025-04-16_unmasked_ZS.pdf › Supplementary Material/FindNICE Benchmark/visualizations/confusion_matrices/cm_o4-mini-2025-04-16_unmasked_ZS.pdf]

CM: o4-mini  
ZS Prompt, Masked Program

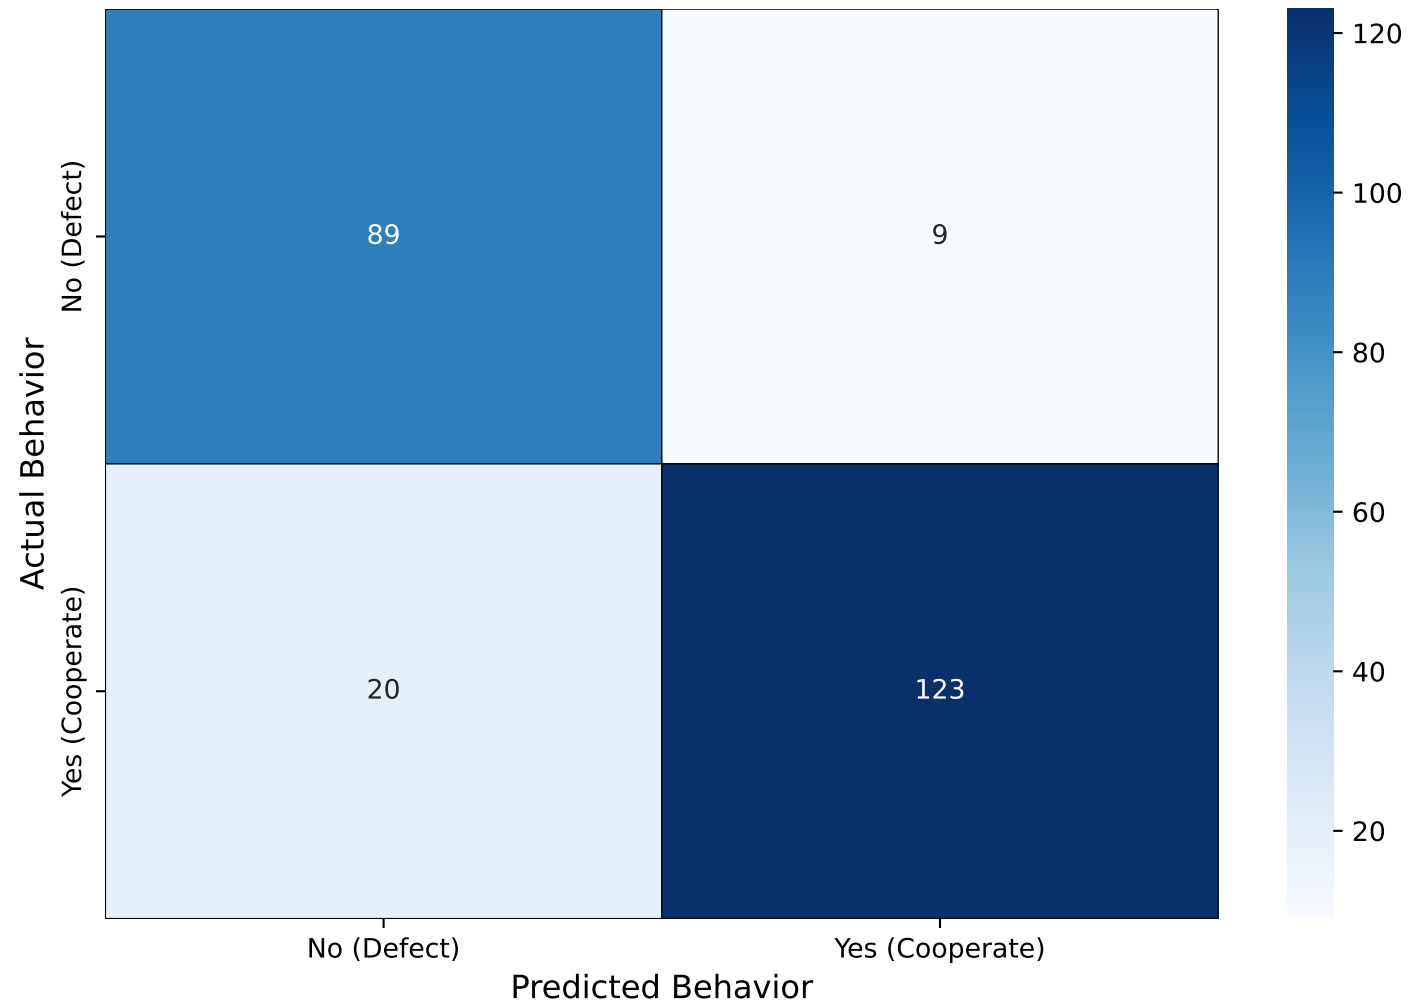

Supplement: supplementary_material [file o4-mini_ZS_masked_confusion.pdf › Supplementary Material/FindNICE Benchmark/visualizations/confusion_matrices/o4-mini_ZS_masked_confusion.pdf]

CM: o4-mini  
ZS Prompt, Obfuscated Program

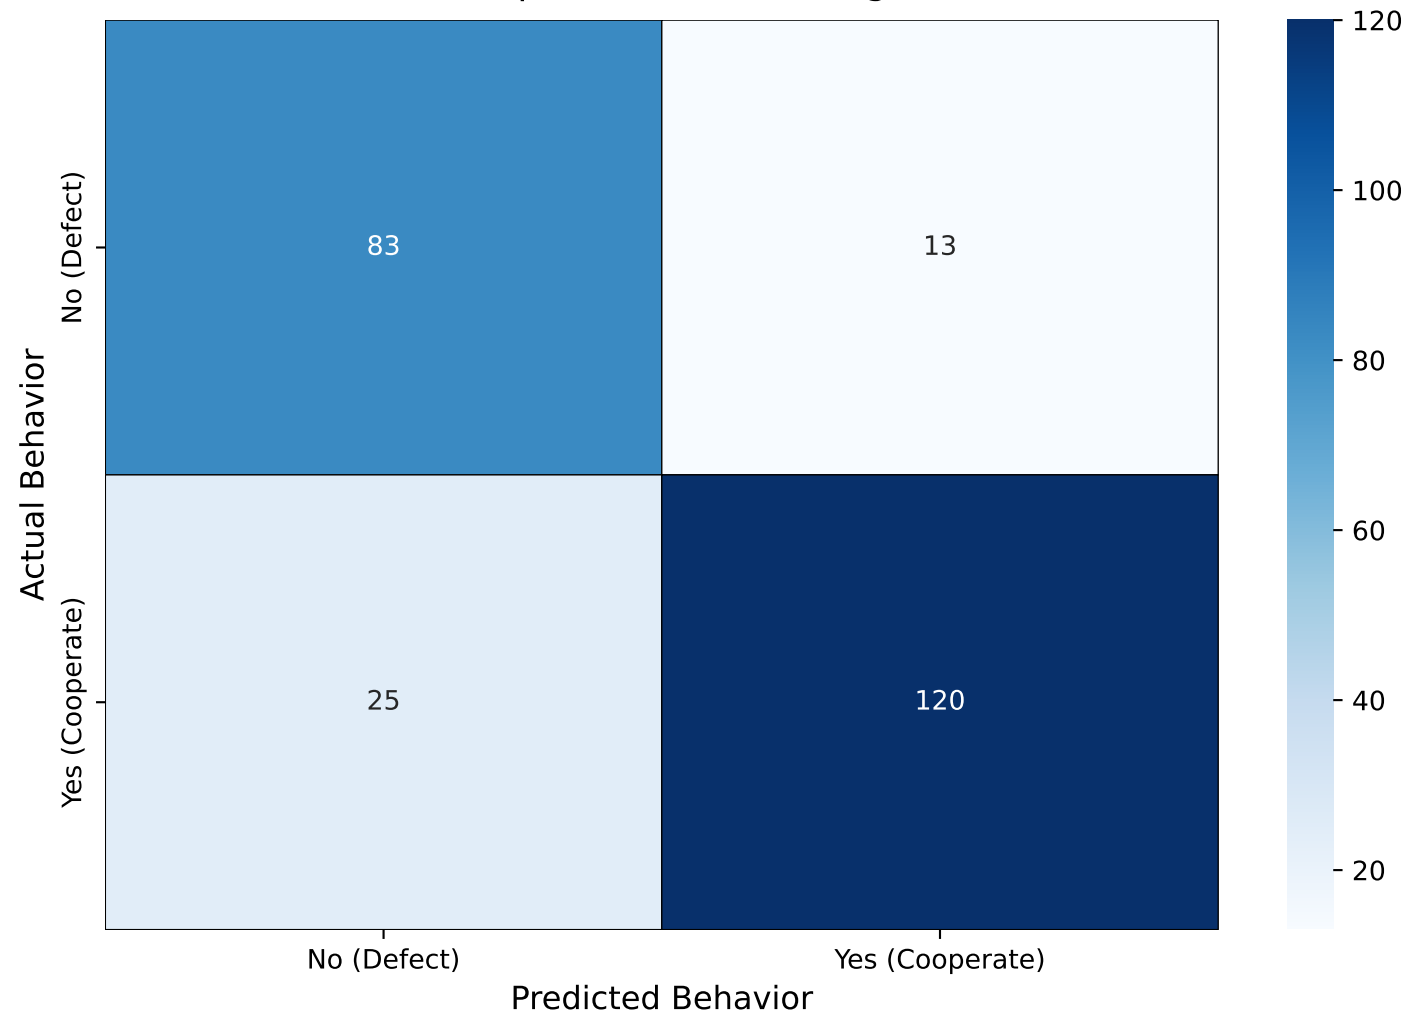

Supplement: supplementary_material [file o4-mini_ZS_obfuscated_confusion.pdf › Supplementary Material/FindNICE Benchmark/visualizations/confusion_matrices/o4-mini_ZS_obfuscated_confusion.pdf]

CM: o4-mini  
ZS Prompt, Unmasked Program

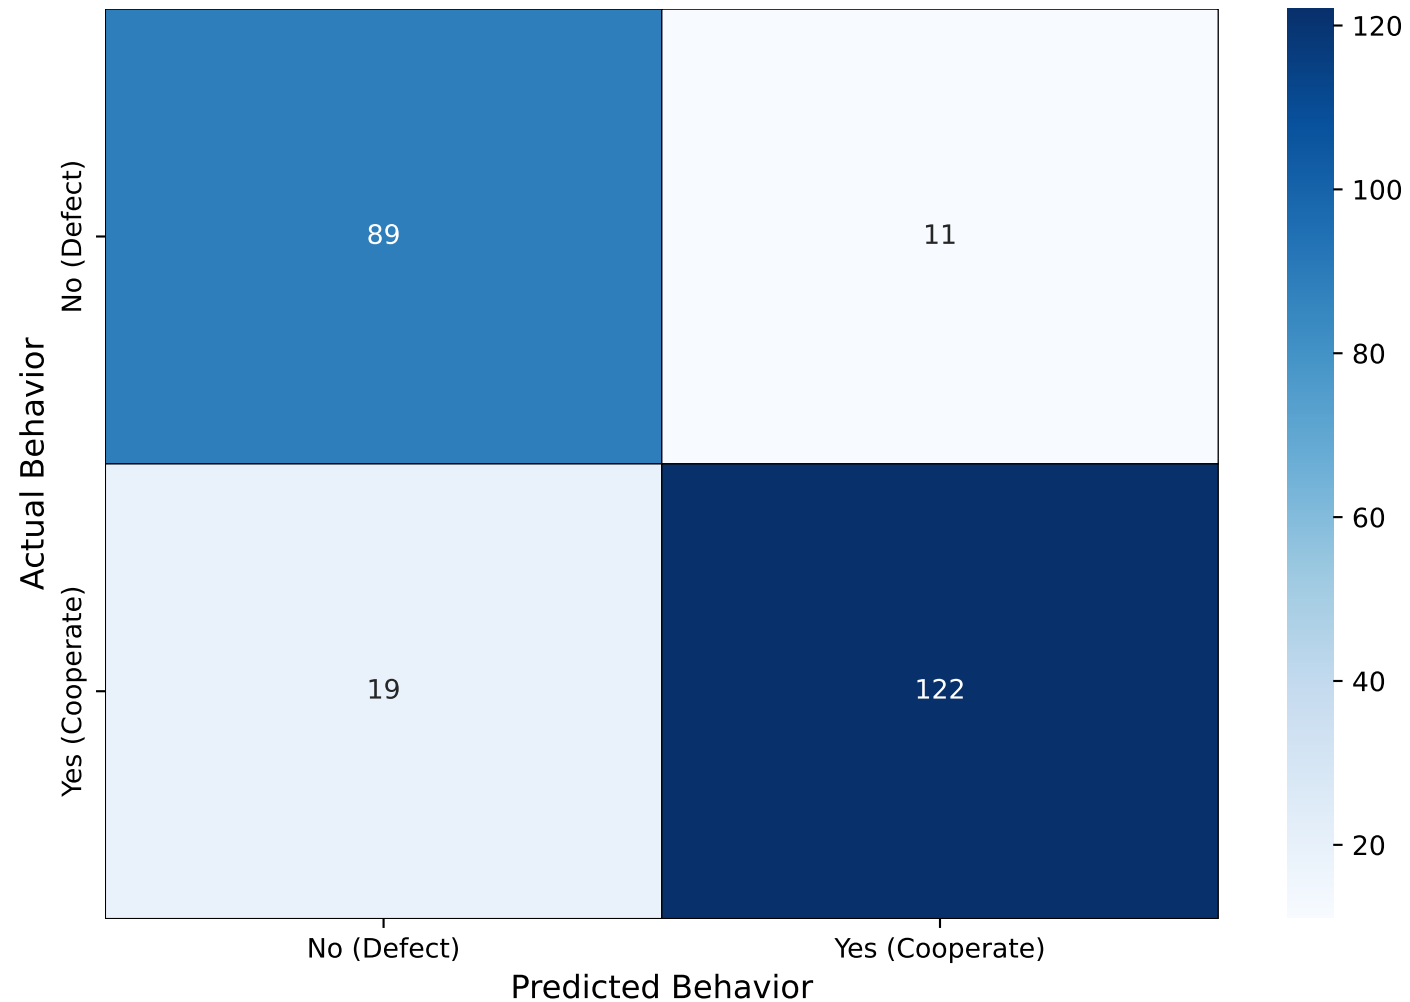

Supplement: supplementary_material [file o4-mini_ZS_unmasked_confusion.pdf › Supplementary Material/FindNICE Benchmark/visualizations/confusion_matrices/o4-mini_ZS_unmasked_confusion.pdf]
