# Supplementary material (part 1 of 2)
Source: ML conference proceedings conference paper supplement (https://openreview.net/forum?id=X9SNL203cV)

# OSAI (PMxPM vs DPMxDPM)

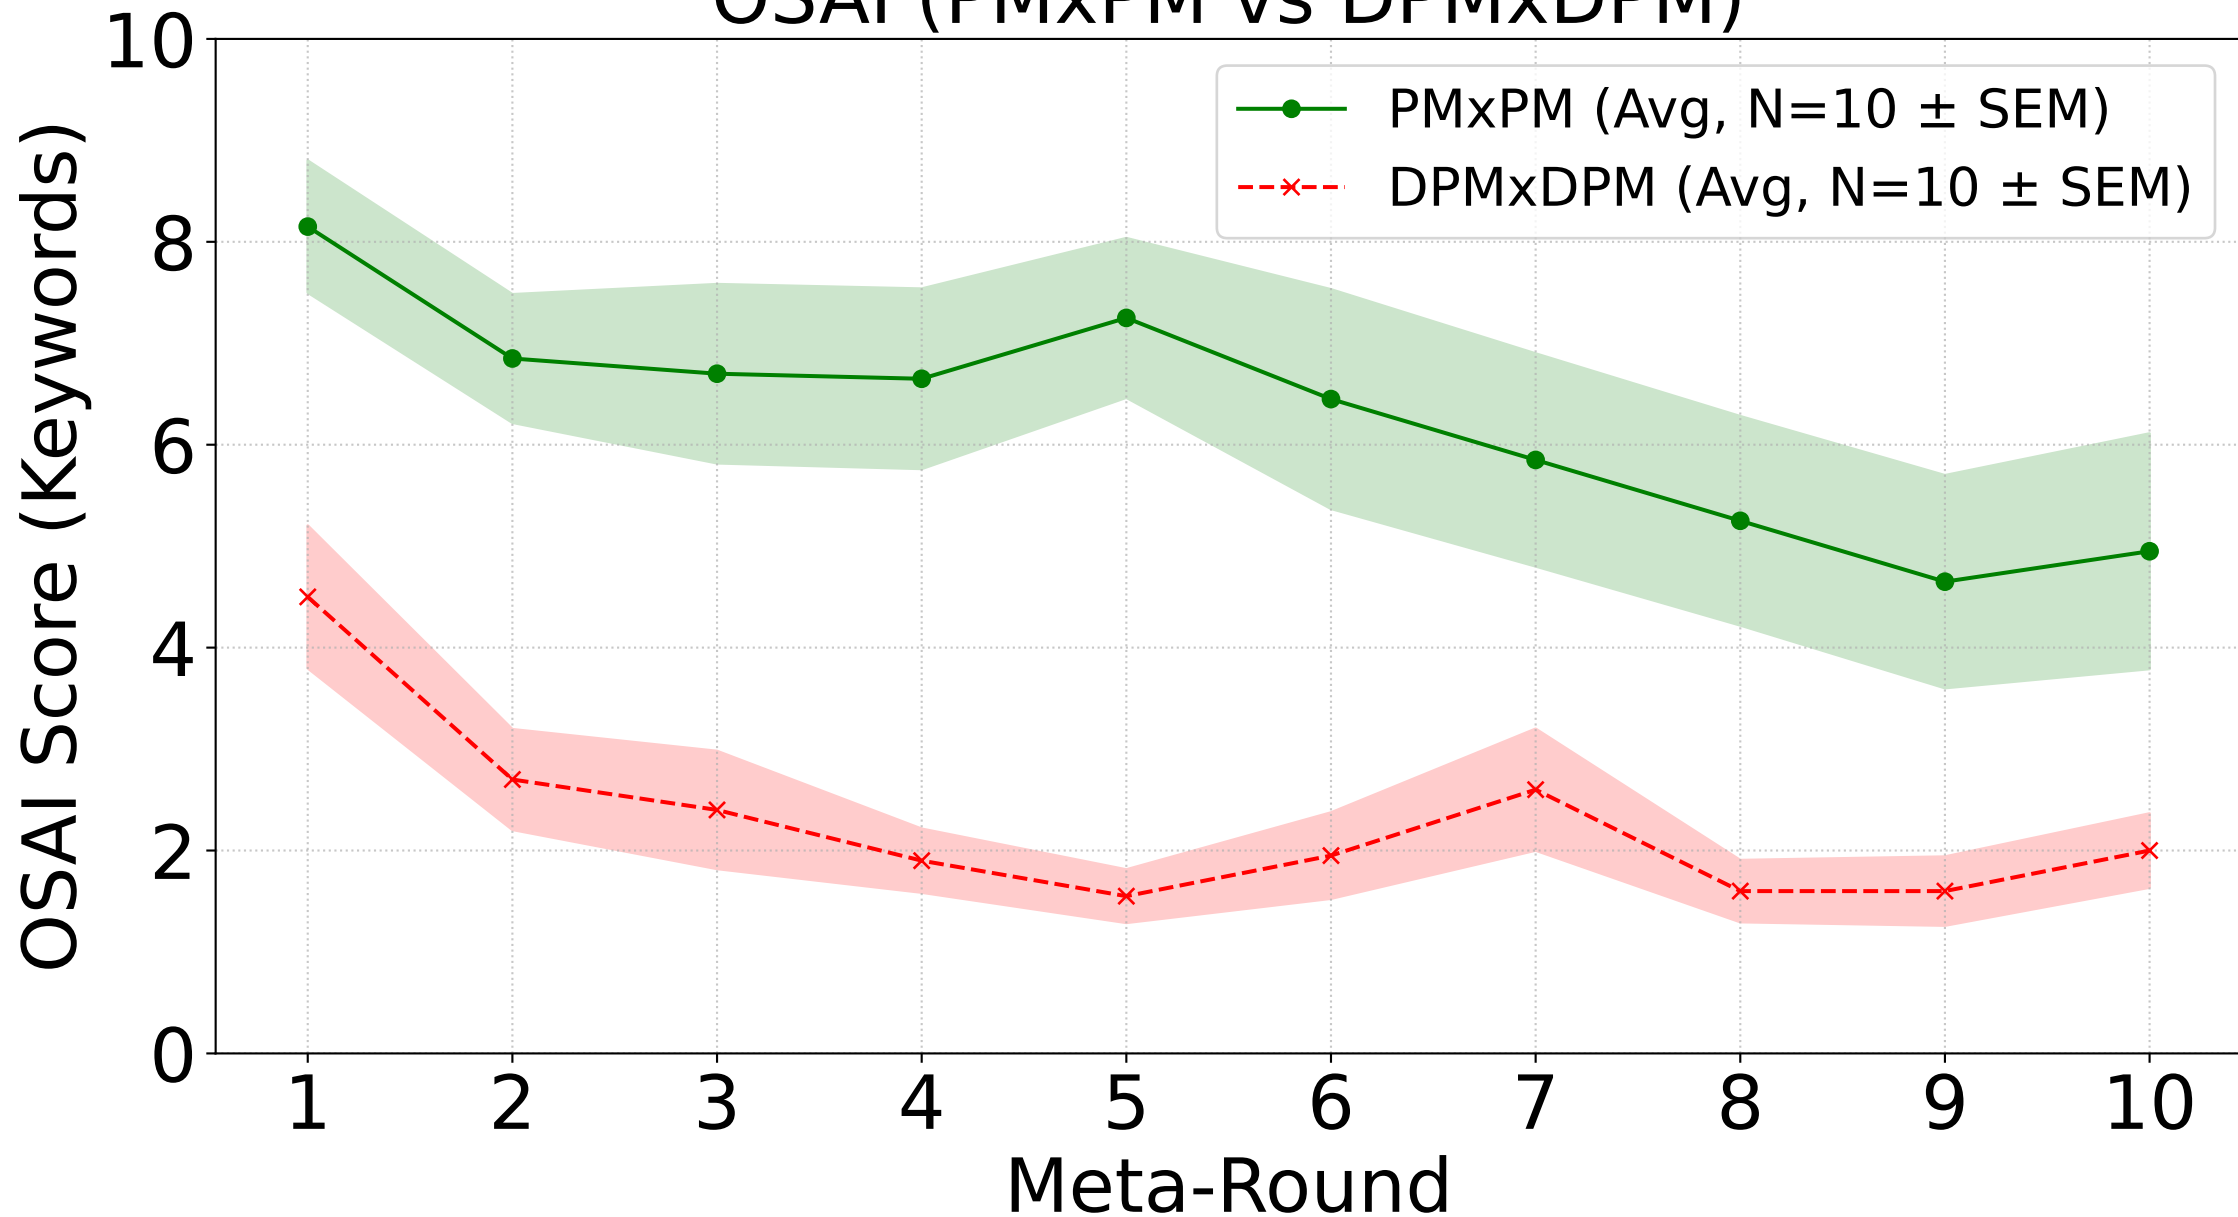

Supplement: supplementary_material [file Combined_Avg_OSAI_PMxPM_vs_DPMxDPM_with_SEM.pdf › Supplementary Material/Dyadic Metagames/Combined_Experiments_Plots_SEM_PMxPM_vs_DPMxDPM/Combined_Avg_OSAI_PMxPM_vs_DPMxDPM_with_SEM.pdf]

Independent Development

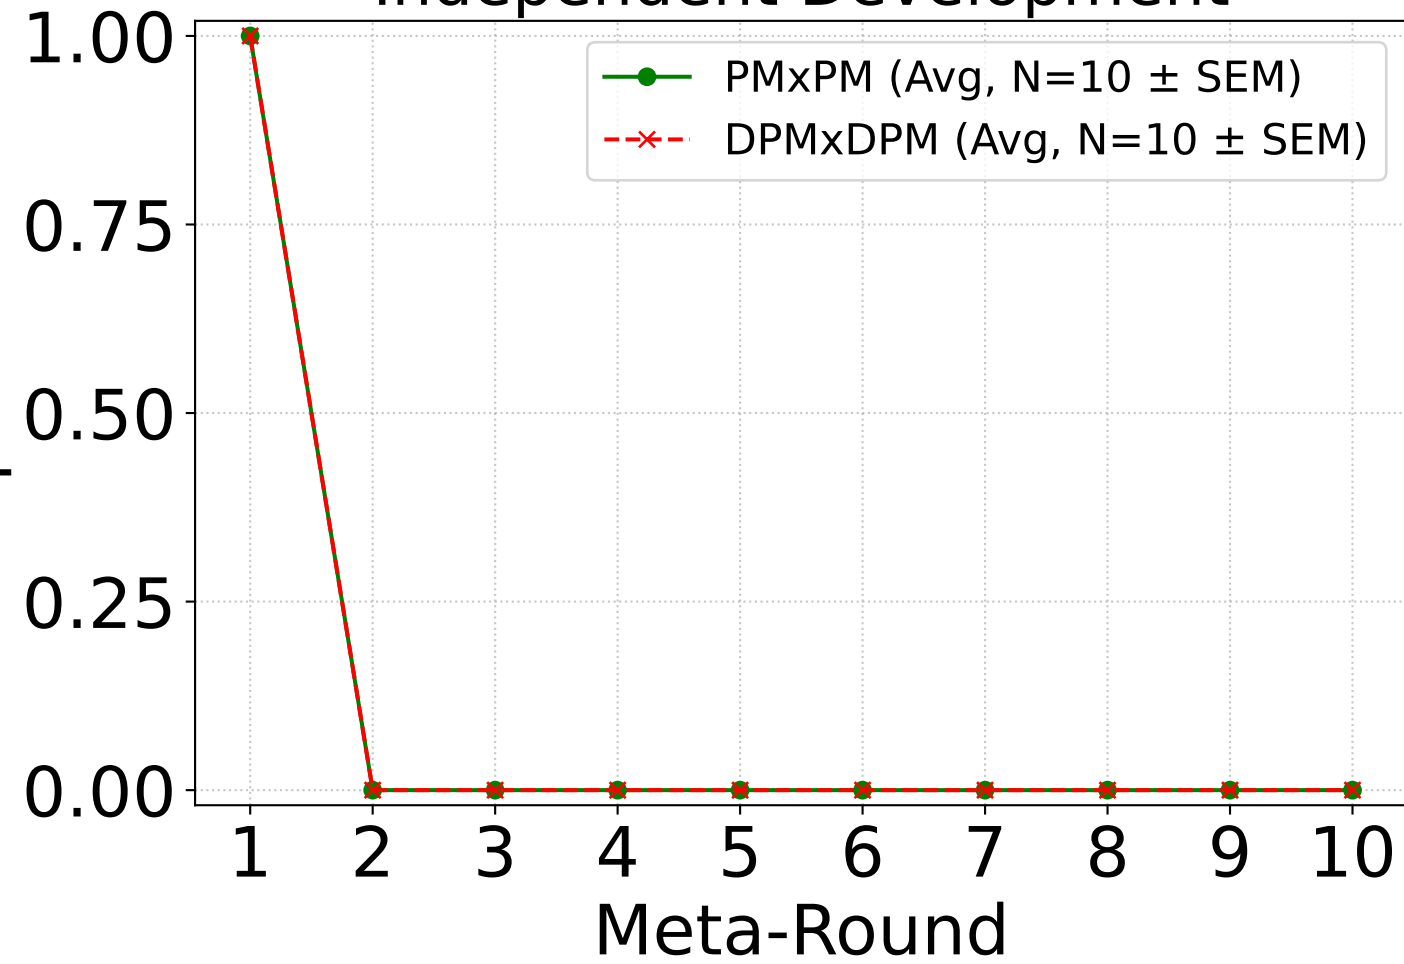

Counter Measure

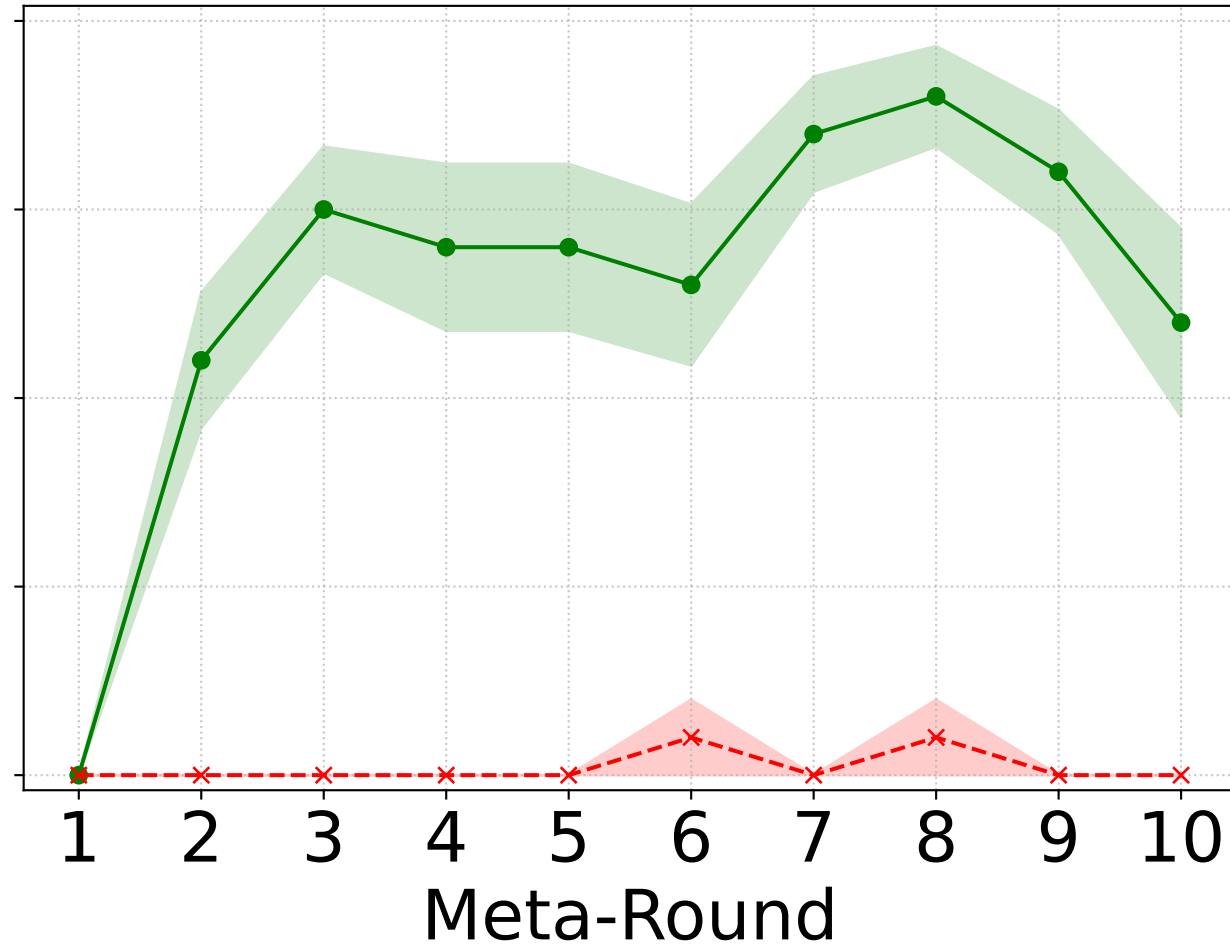

Exploitation Attempt

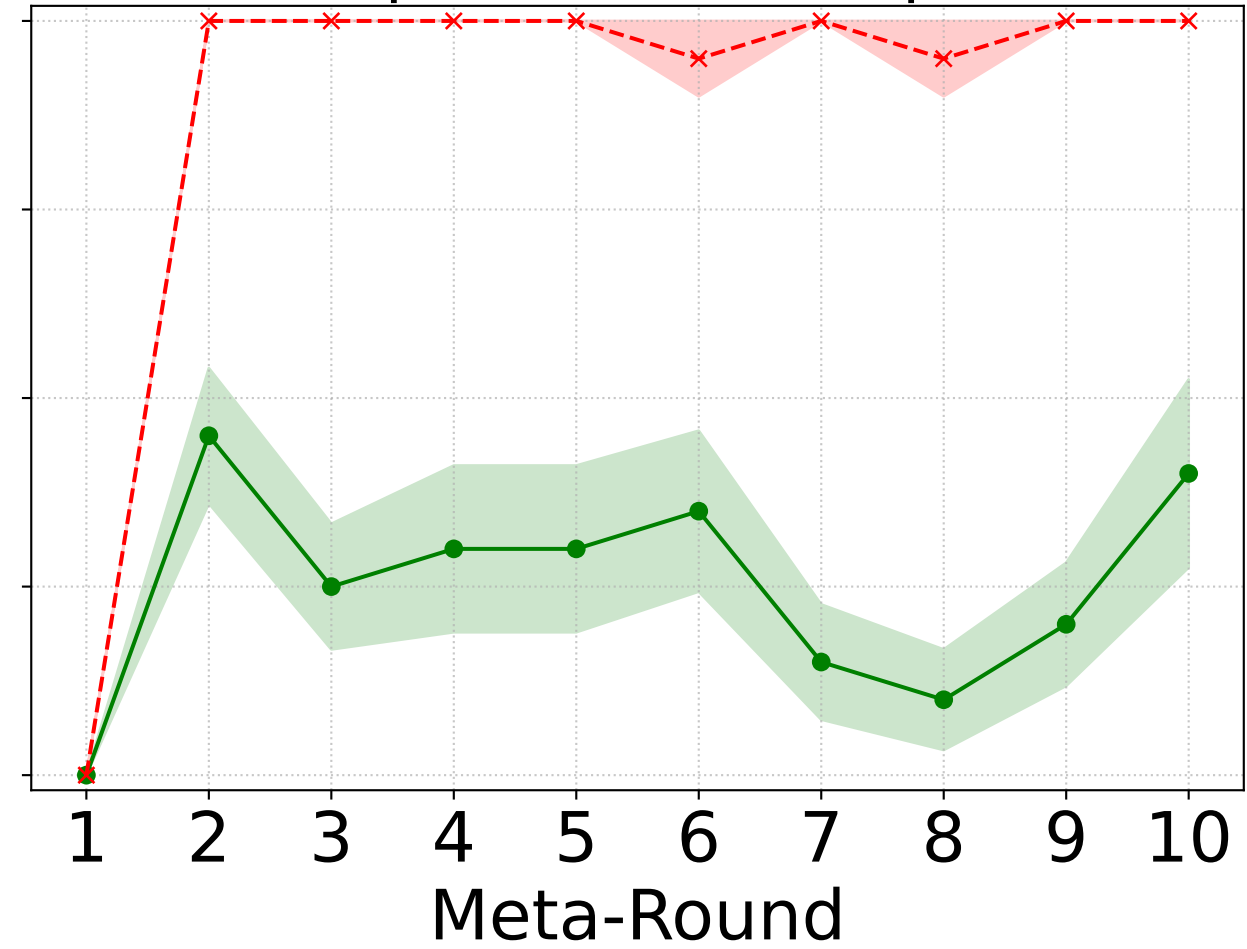

Supplement: supplementary_material [file Combined_Multipanel_Strategic_Responses_PMxPM_vs_DPMxDPM_with_SEM.pdf › Supplementary Material/Dyadic Metagames/Combined_Experiments_Plots_SEM_PMxPM_vs_DPMxDPM/Combined_Multipanel_Strategic_Responses_PMxPM_vs_DPMxDPM_with_SEM.pdf]

**Qwen-72B**

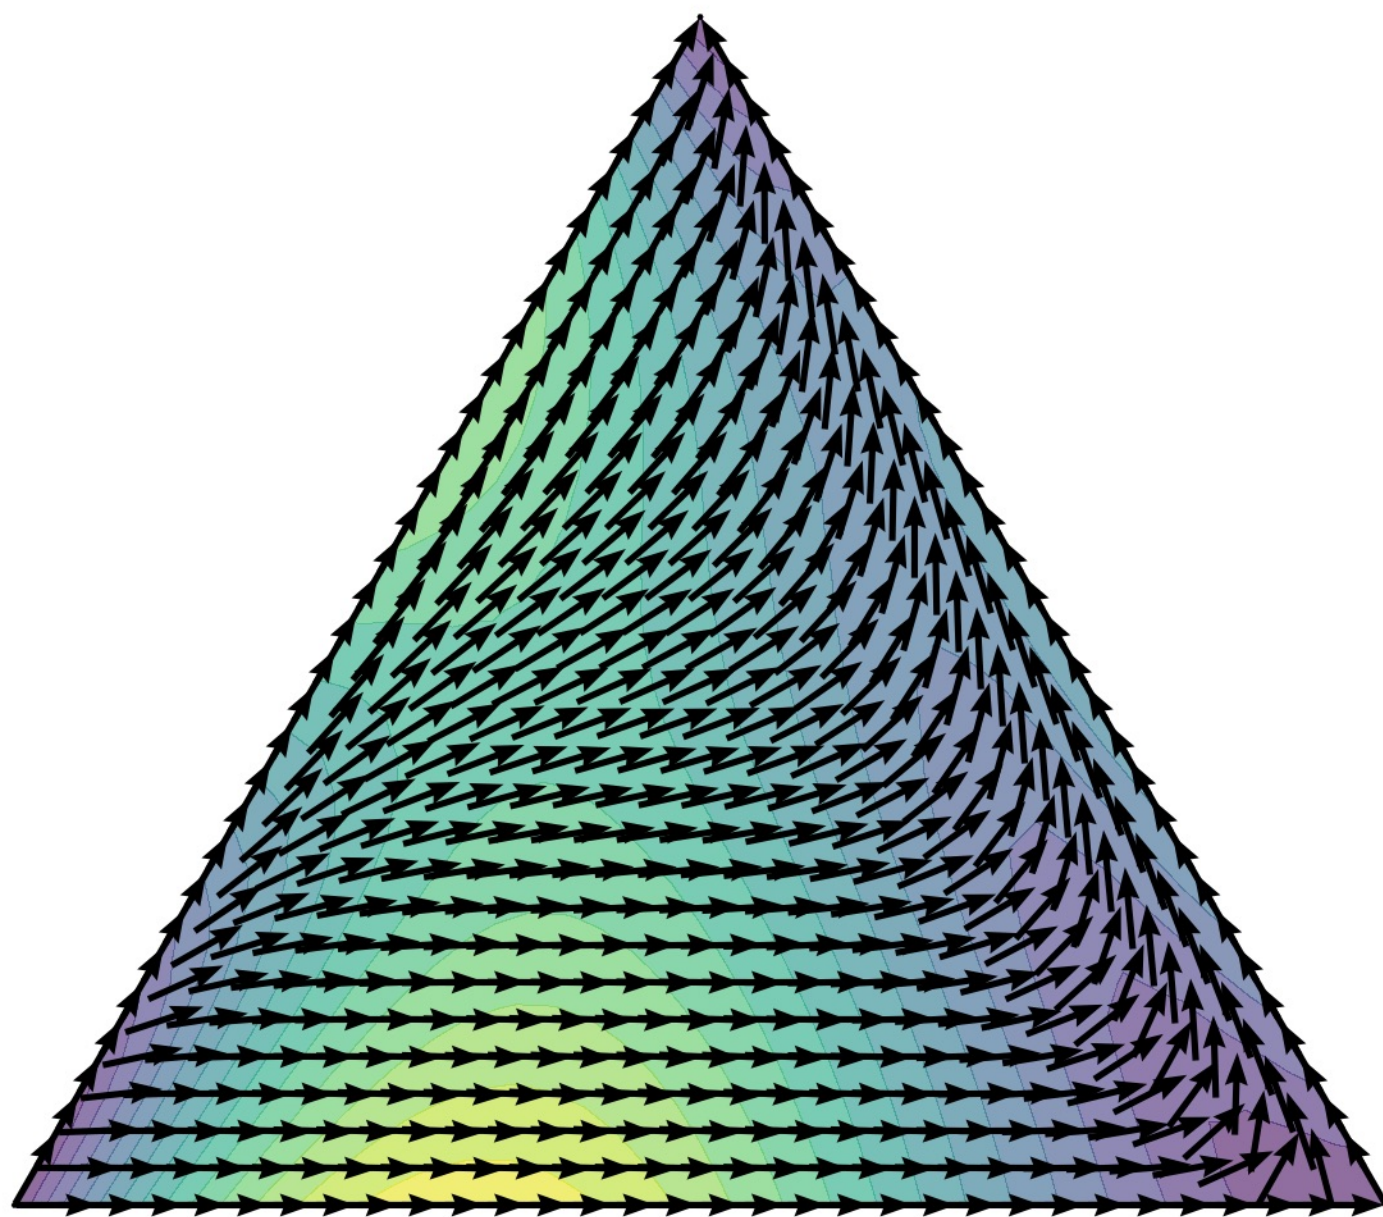

Flow Strength

0.42

0.36

0.30

0.24

0.18

0.12

0.06

0.00

**Qwen-1.5B**

**Qwen-32B**

Supplement: supplementary_material [file QwenSimplex.pdf › Supplementary Material/Evolutionary Dynamics/simplex_visualizations/QwenSimplex.pdf]

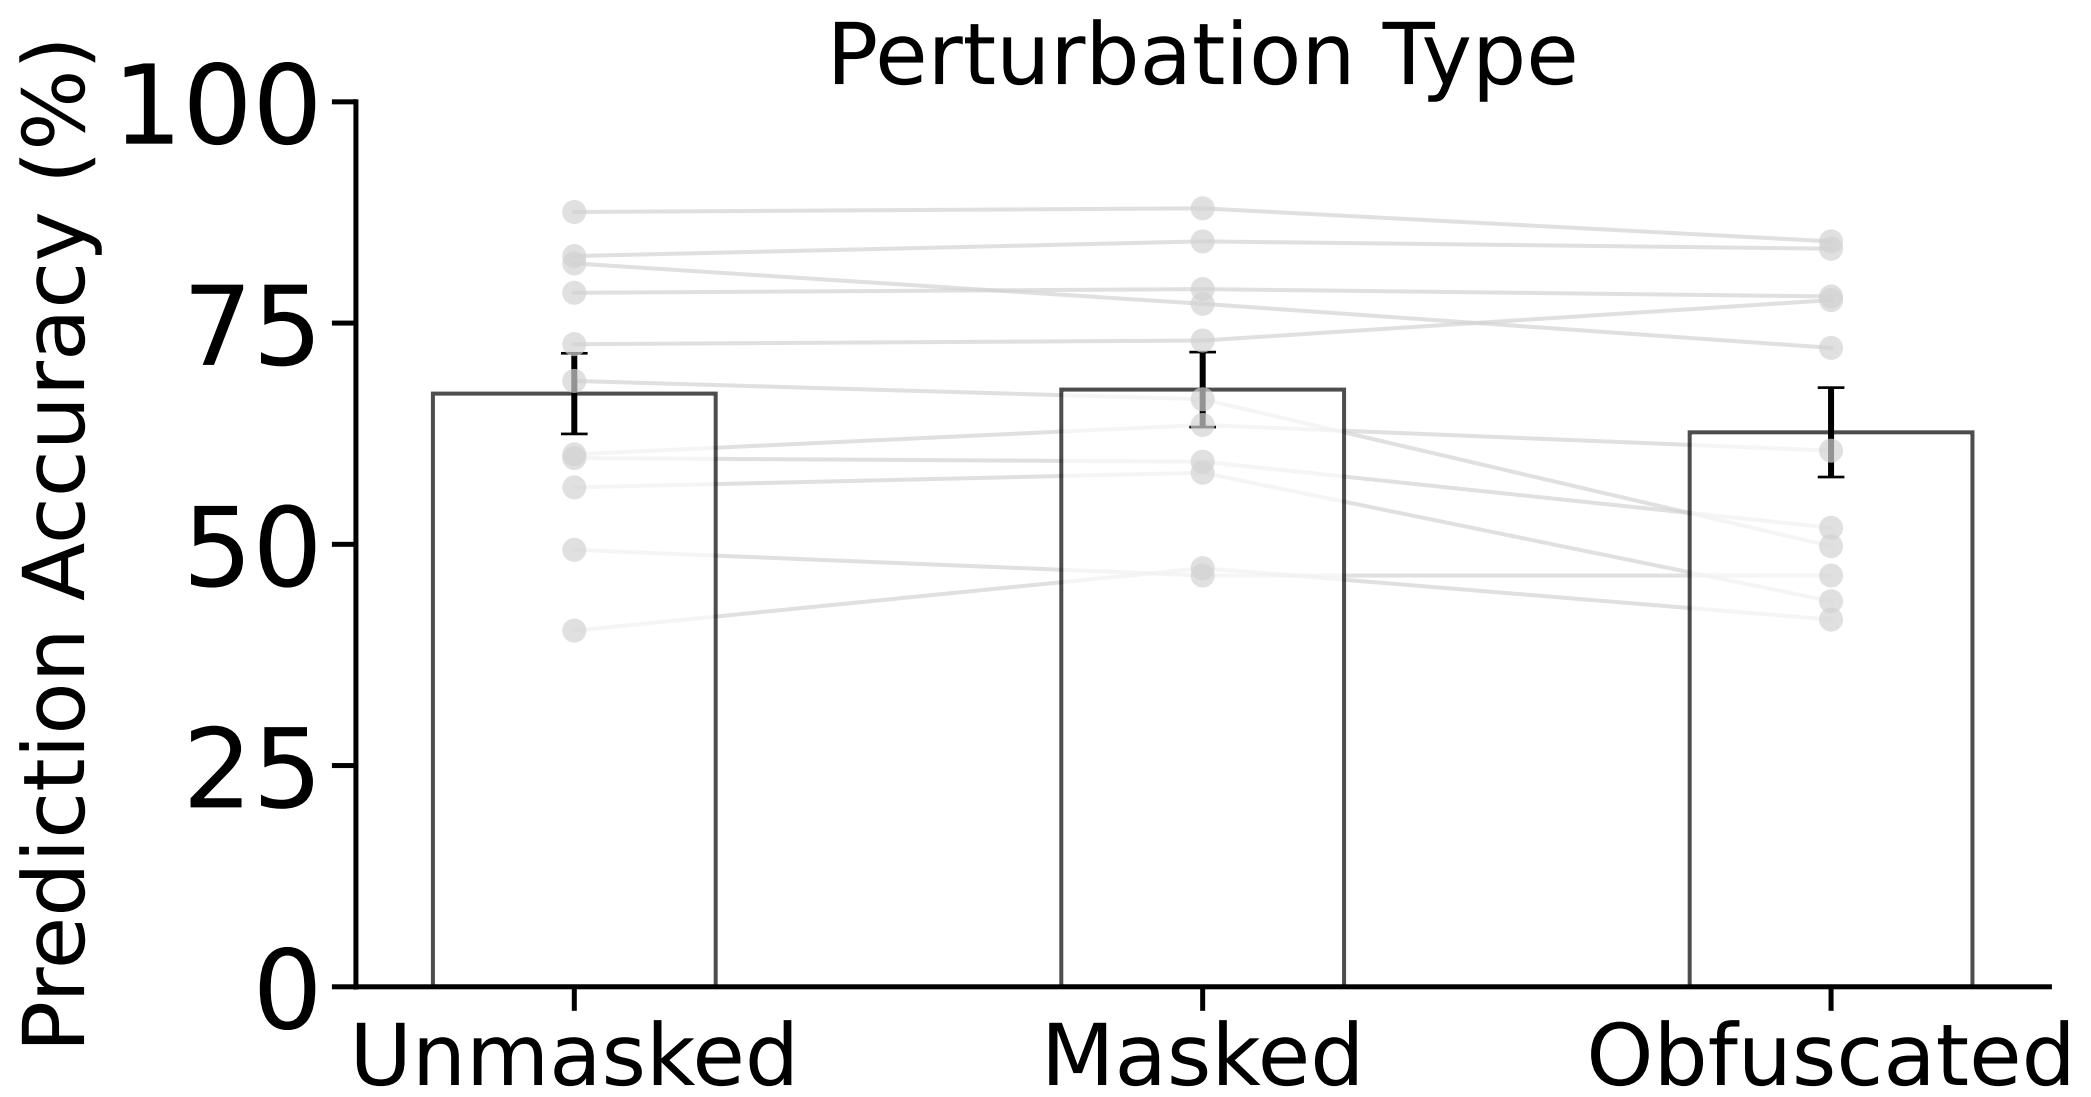

Supplement: supplementary_material [file perturbation_comparison_zs.pdf › Supplementary Material/FindNICE Benchmark/visualizations/comparative_plots/perturbation_comparison_zs.pdf]

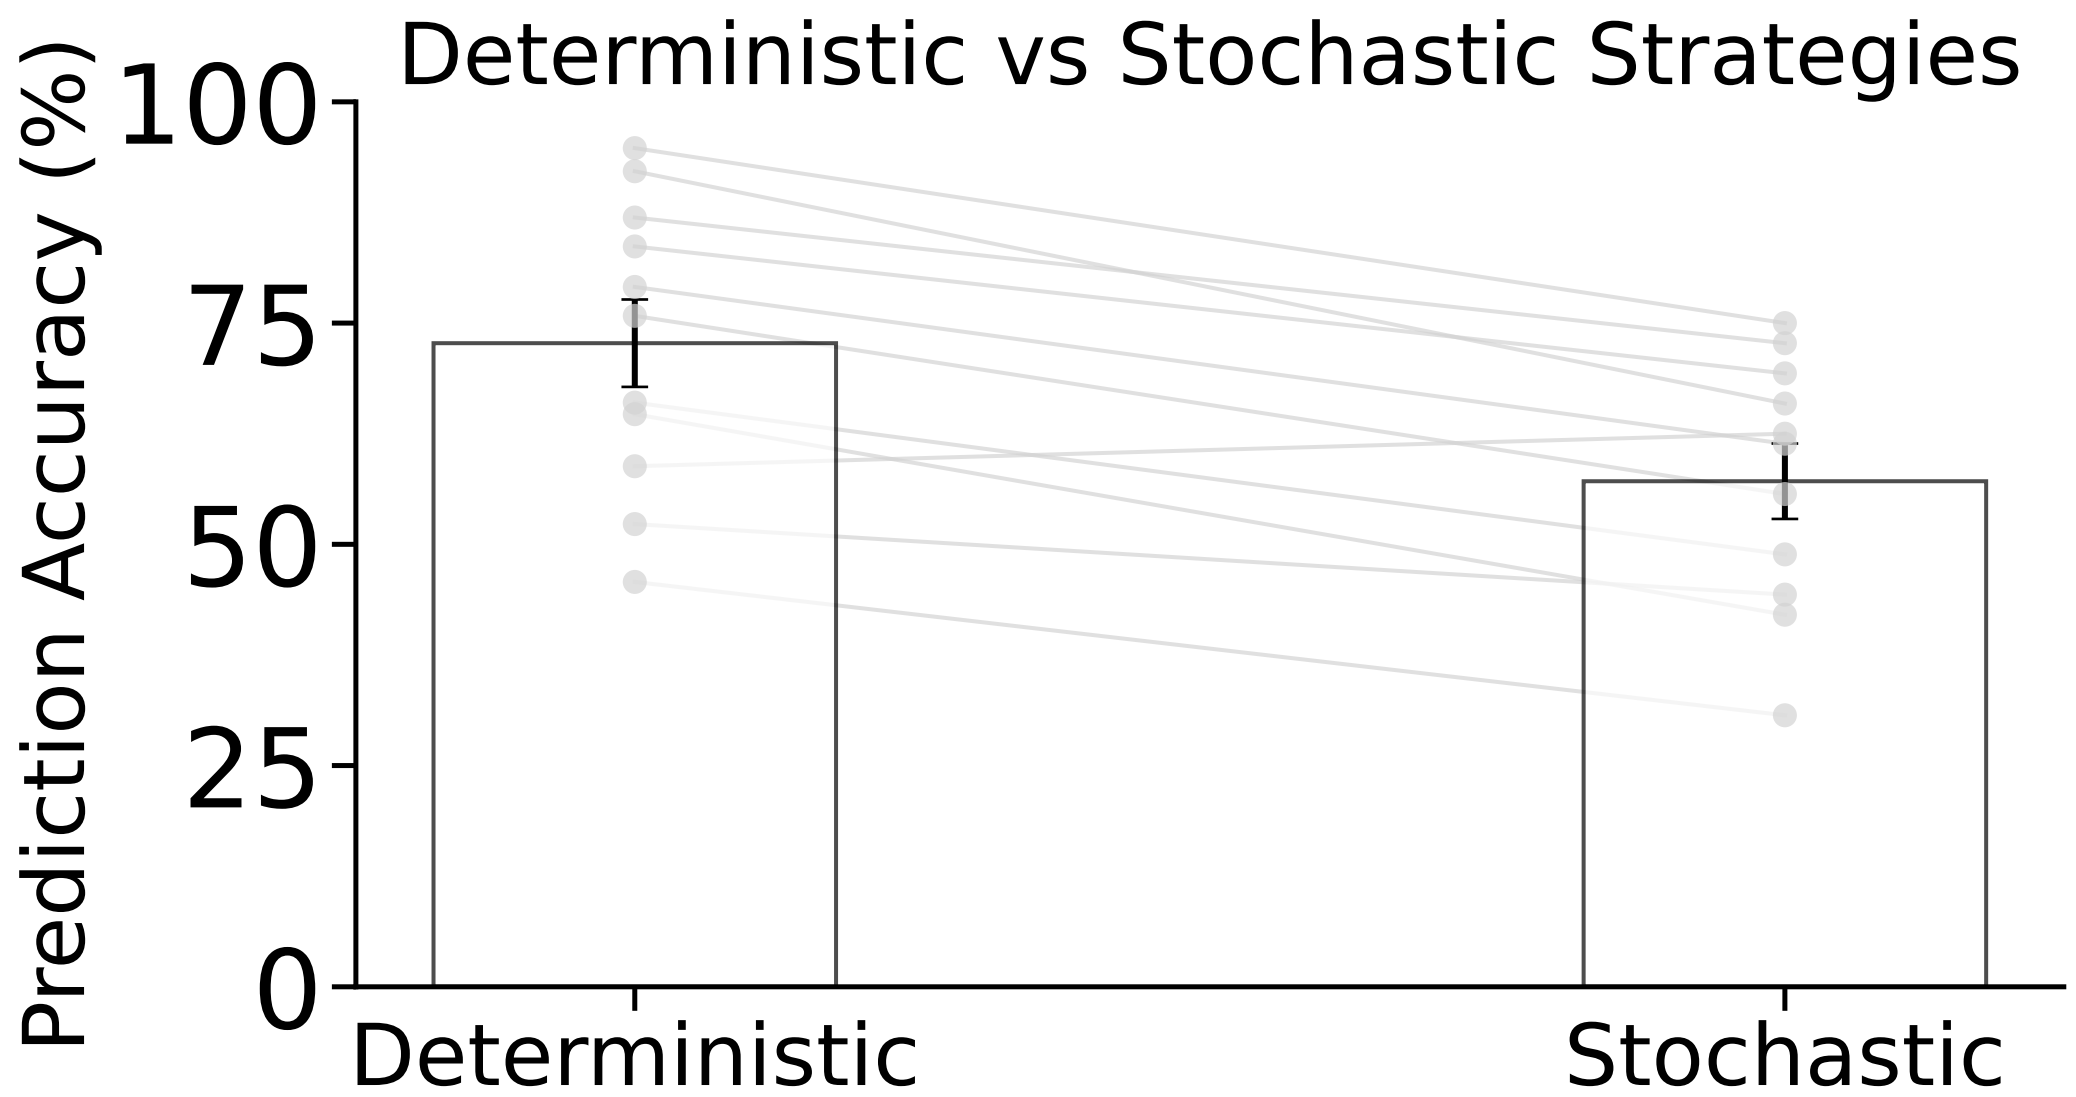

Supplement: supplementary_material [file stochastic_vs_deterministic_zs_unmasked.pdf › Supplementary Material/FindNICE Benchmark/visualizations/comparative_plots/stochastic_vs_deterministic_zs_unmasked.pdf]

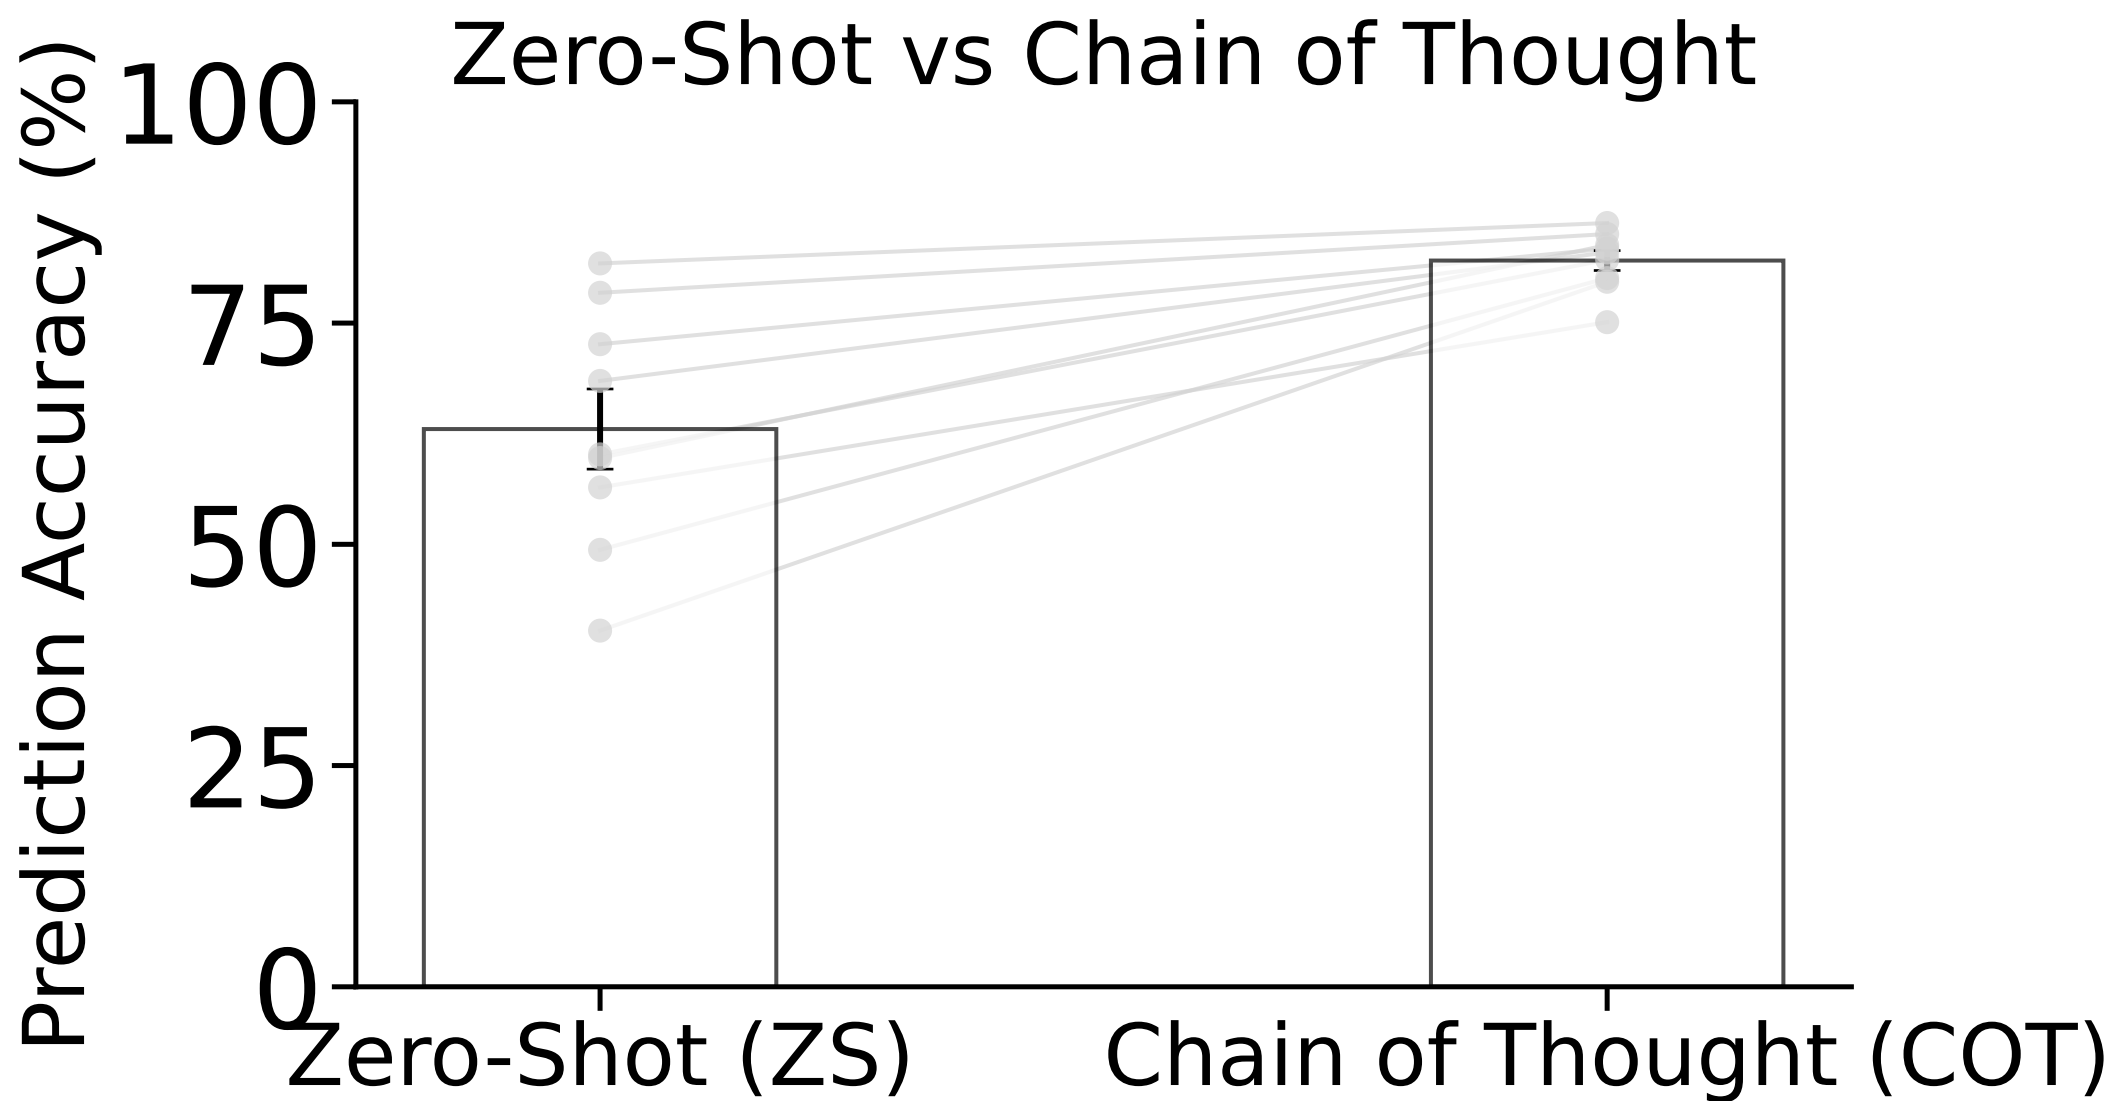

Supplement: supplementary_material [file zs_vs_cot_comparison.pdf › Supplementary Material/FindNICE Benchmark/visualizations/comparative_plots/zs_vs_cot_comparison.pdf]

CM: DeepSeek-R1  
ZS Prompt, Masked Program

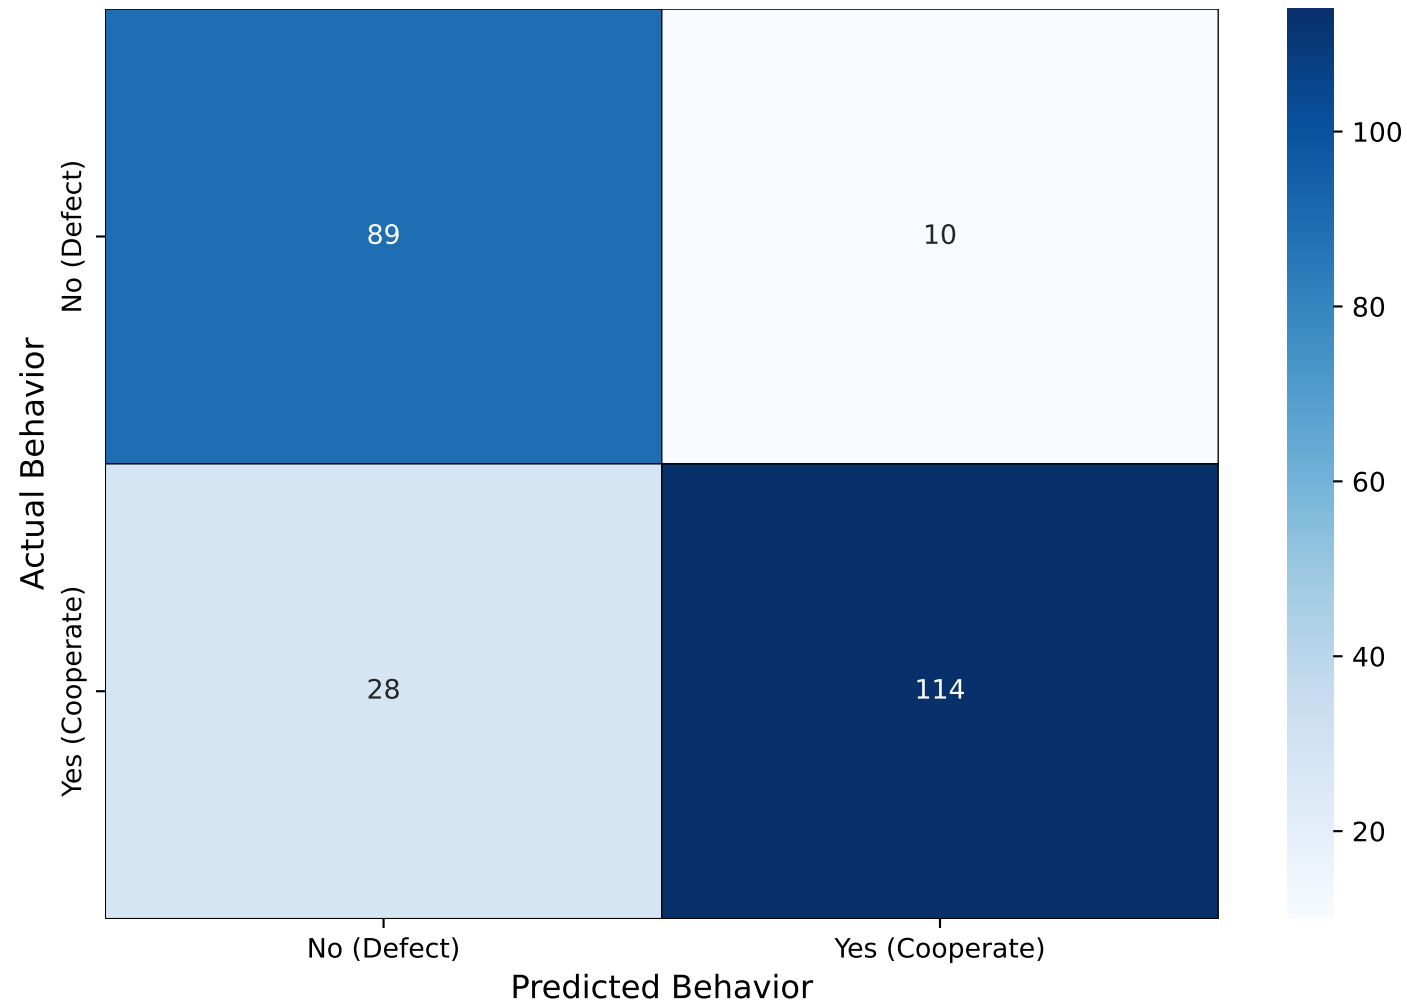

Supplement: supplementary_material [file DeepSeek-R1_ZS_masked_confusion.pdf › Supplementary Material/FindNICE Benchmark/visualizations/confusion_matrices/DeepSeek-R1_ZS_masked_confusion.pdf]

CM: DeepSeek-R1  
ZS Prompt, Obfuscated Program

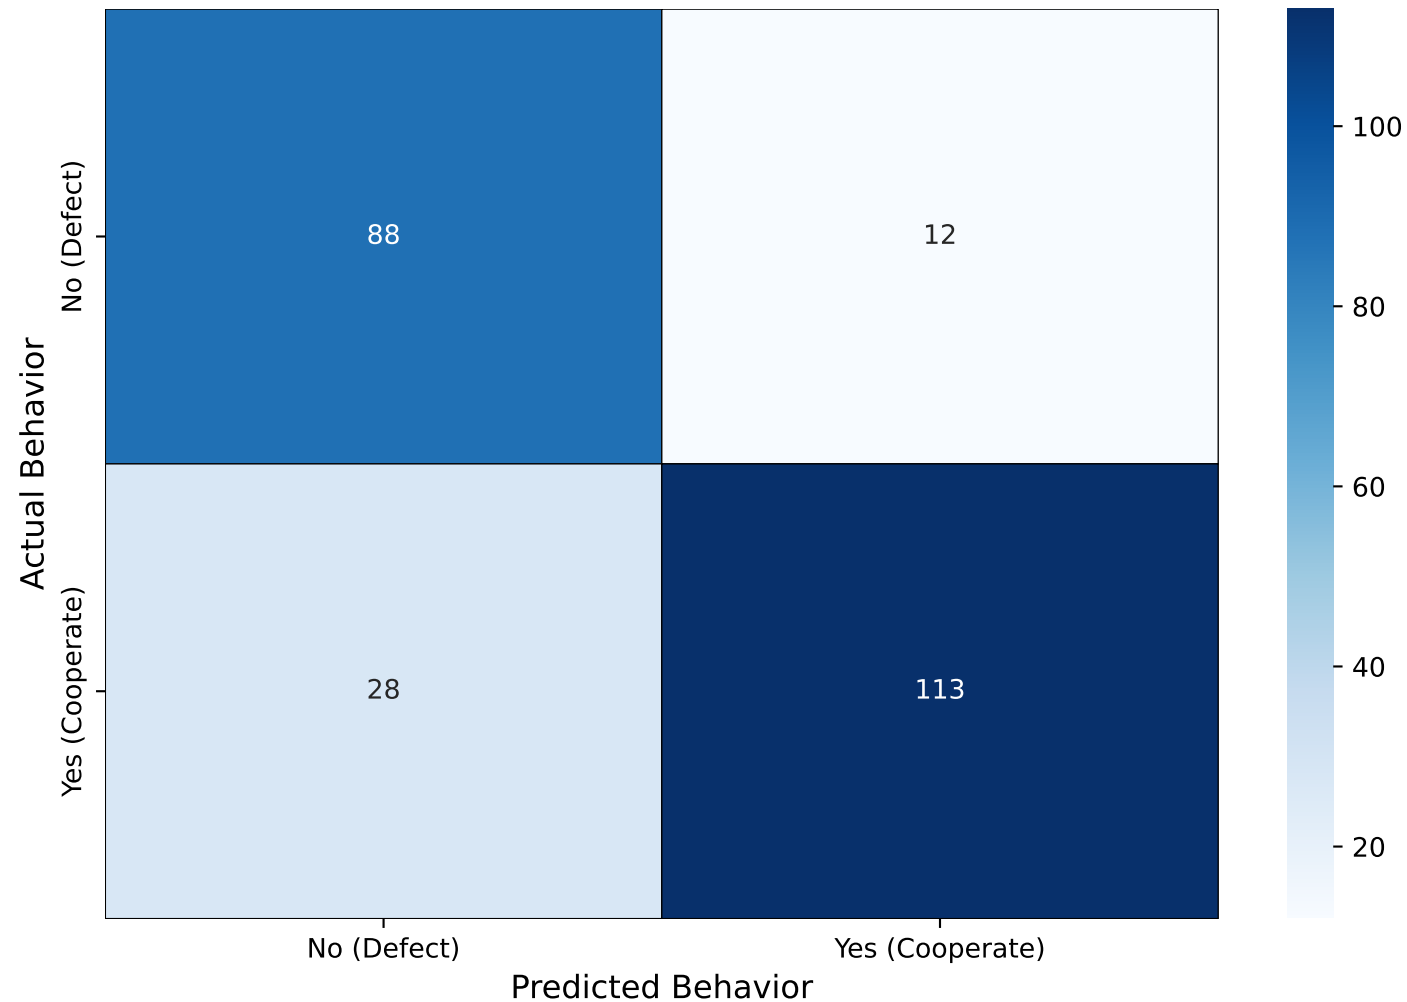

Supplement: supplementary_material [file DeepSeek-R1_ZS_obfuscated_confusion.pdf › Supplementary Material/FindNICE Benchmark/visualizations/confusion_matrices/DeepSeek-R1_ZS_obfuscated_confusion.pdf]

CM: DeepSeek-R1  
ZS Prompt, Unmasked Program

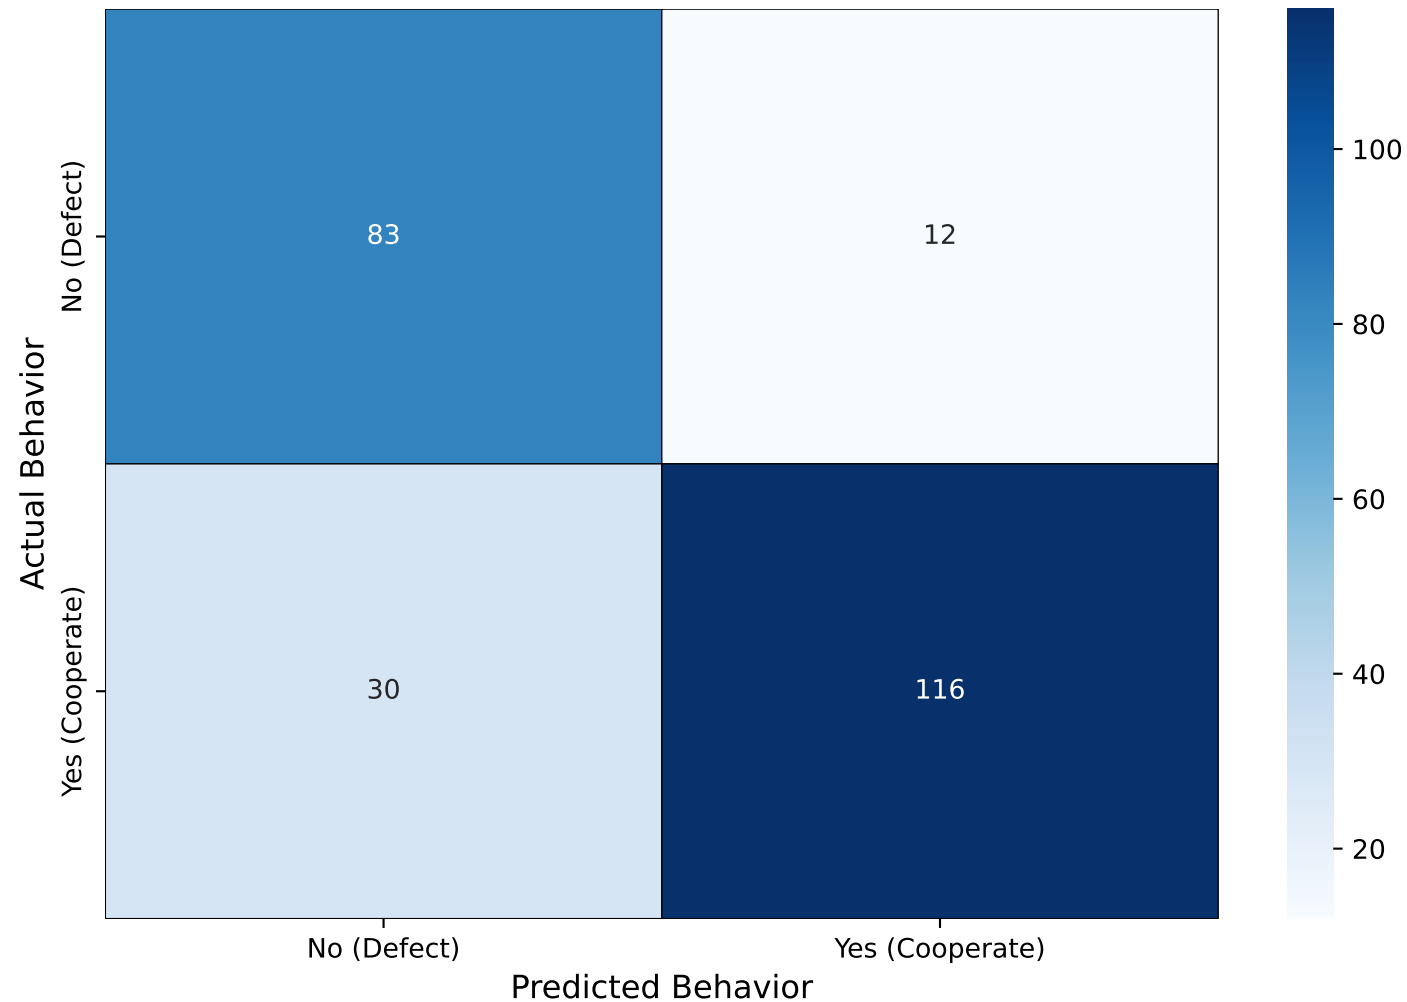

Supplement: supplementary_material [file DeepSeek-R1_ZS_unmasked_confusion.pdf › Supplementary Material/FindNICE Benchmark/visualizations/confusion_matrices/DeepSeek-R1_ZS_unmasked_confusion.pdf]

CM: DeepSeek-V3  
COT Prompt, Masked Program

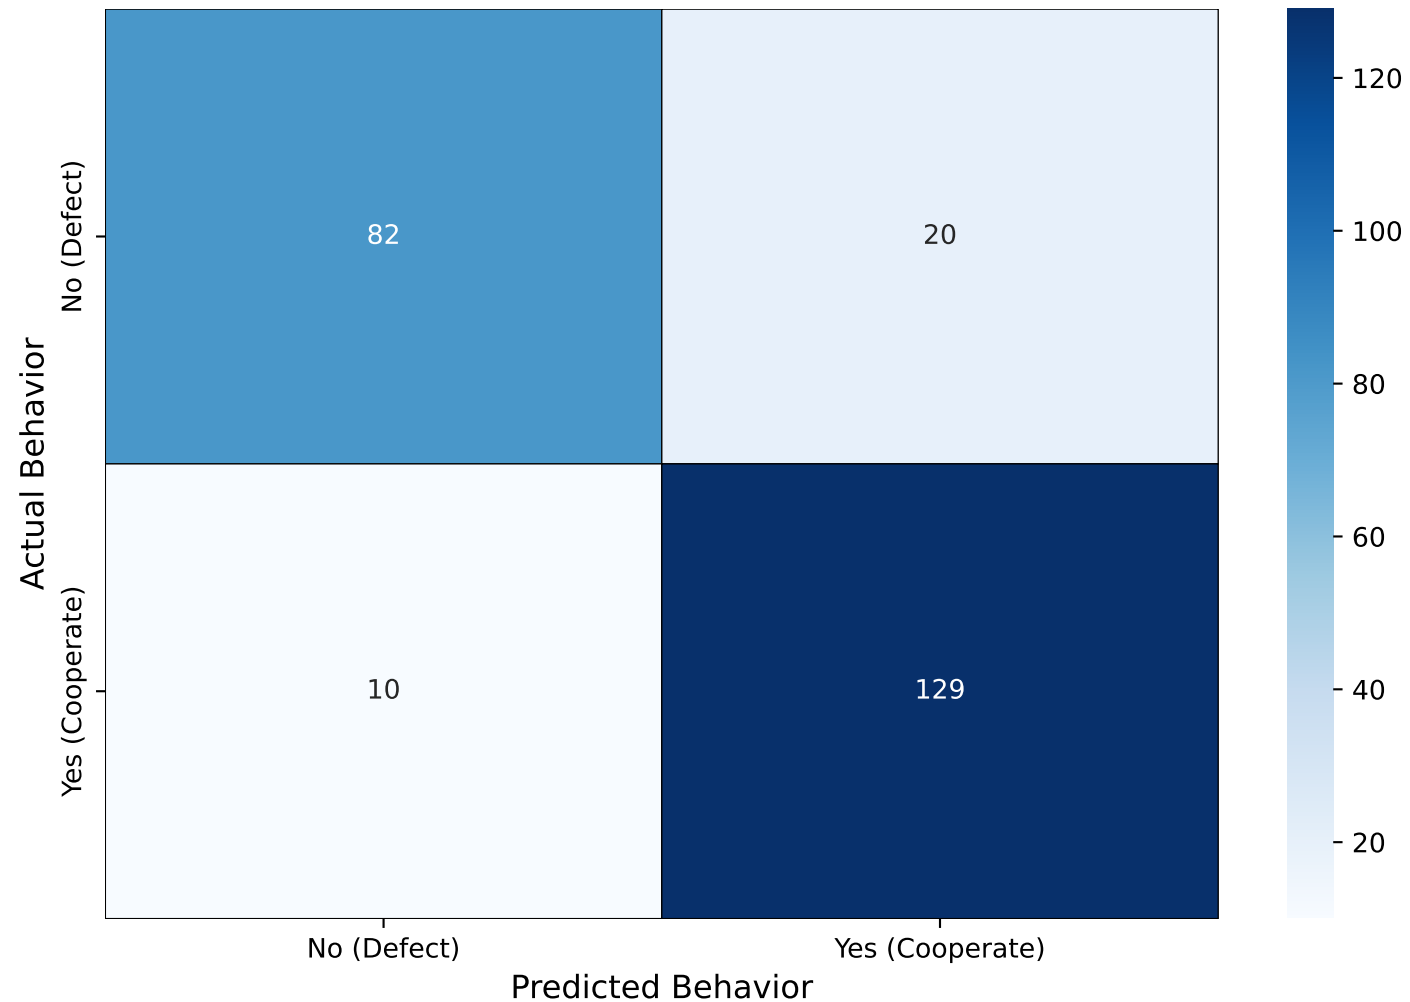

Supplement: supplementary_material [file DeepSeek-V3_COT_masked_confusion.pdf › Supplementary Material/FindNICE Benchmark/visualizations/confusion_matrices/DeepSeek-V3_COT_masked_confusion.pdf]

CM: DeepSeek-V3  
COT Prompt, Obfuscated Program

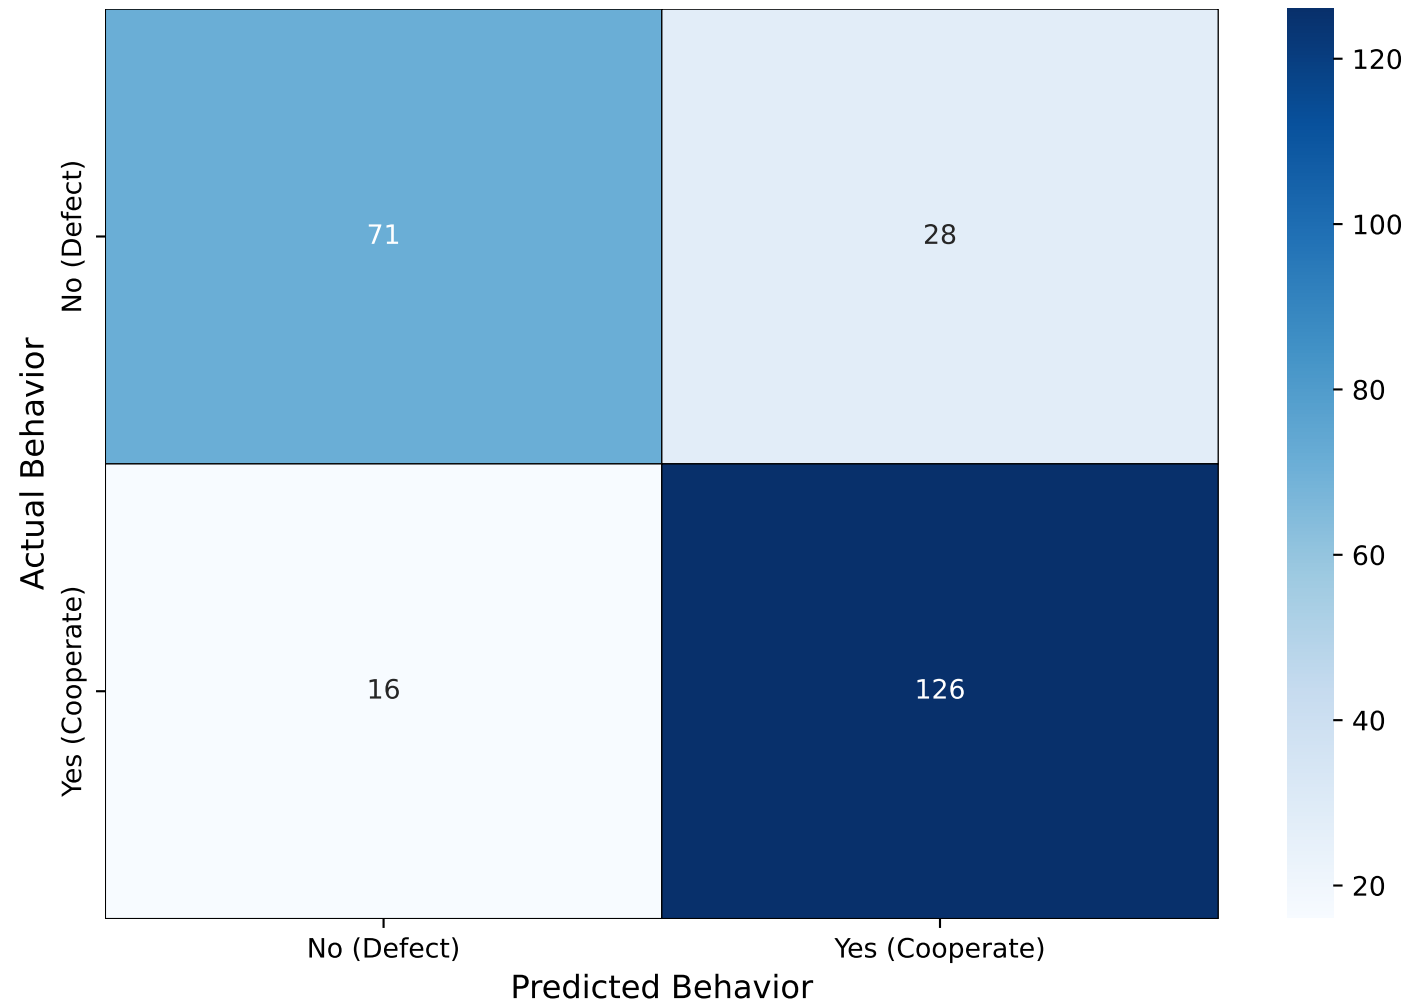

Supplement: supplementary_material [file DeepSeek-V3_COT_obfuscated_confusion.pdf › Supplementary Material/FindNICE Benchmark/visualizations/confusion_matrices/DeepSeek-V3_COT_obfuscated_confusion.pdf]

CM: DeepSeek-V3  
COT Prompt, Unmasked Program

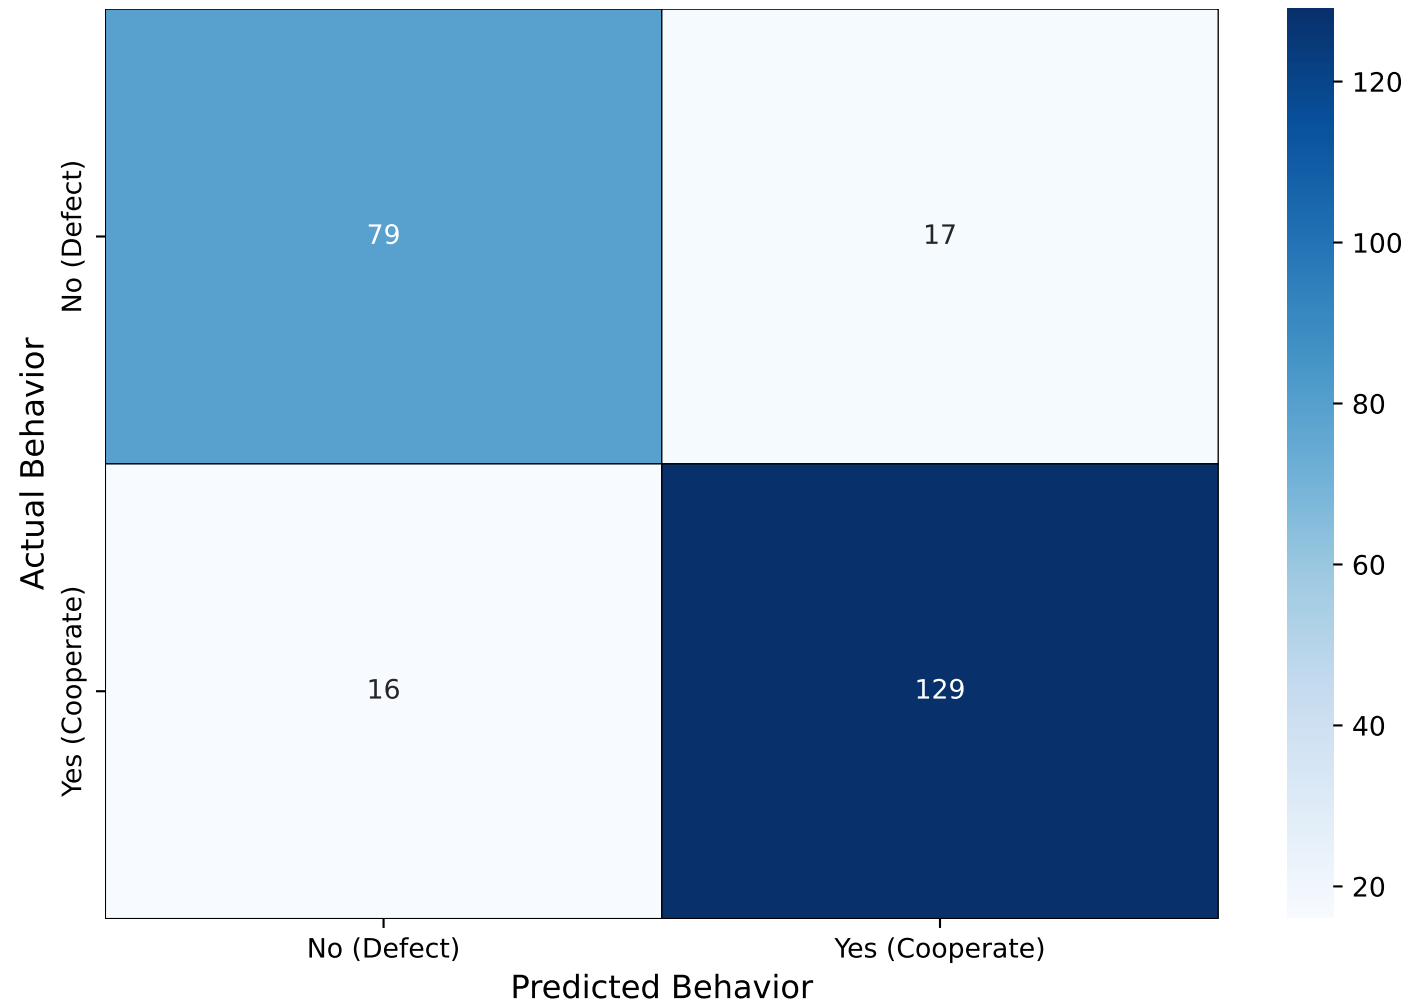

Supplement: supplementary_material [file DeepSeek-V3_COT_unmasked_confusion.pdf › Supplementary Material/FindNICE Benchmark/visualizations/confusion_matrices/DeepSeek-V3_COT_unmasked_confusion.pdf]

CM: DeepSeek-V3  
ZS Prompt, Masked Program

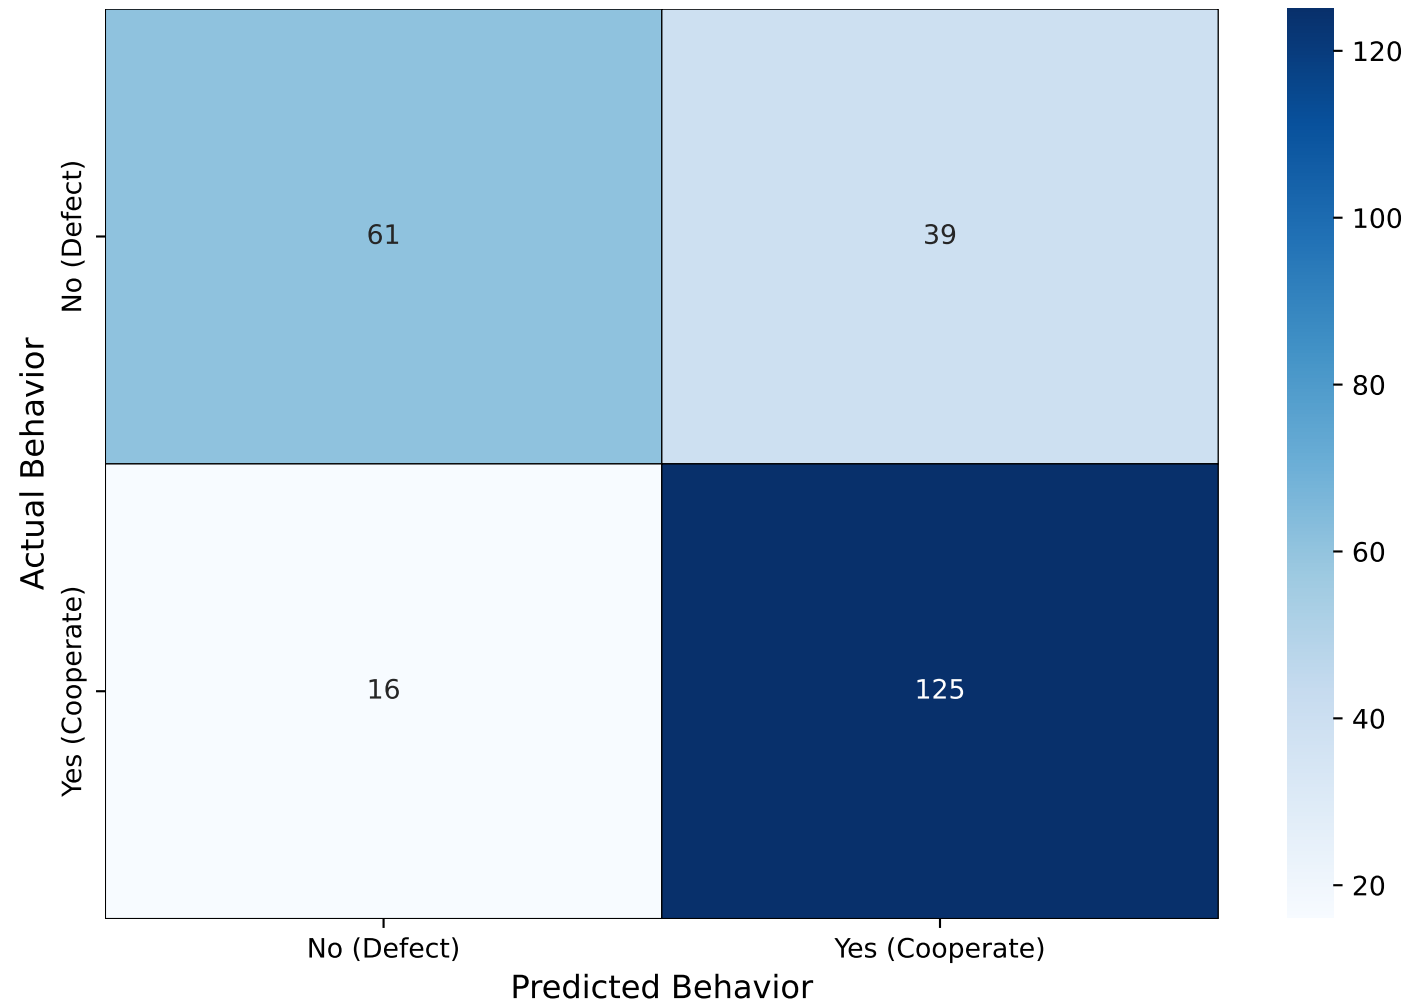

Supplement: supplementary_material [file DeepSeek-V3_ZS_masked_confusion.pdf › Supplementary Material/FindNICE Benchmark/visualizations/confusion_matrices/DeepSeek-V3_ZS_masked_confusion.pdf]

CM: DeepSeek-V3  
ZS Prompt, Obfuscated Program

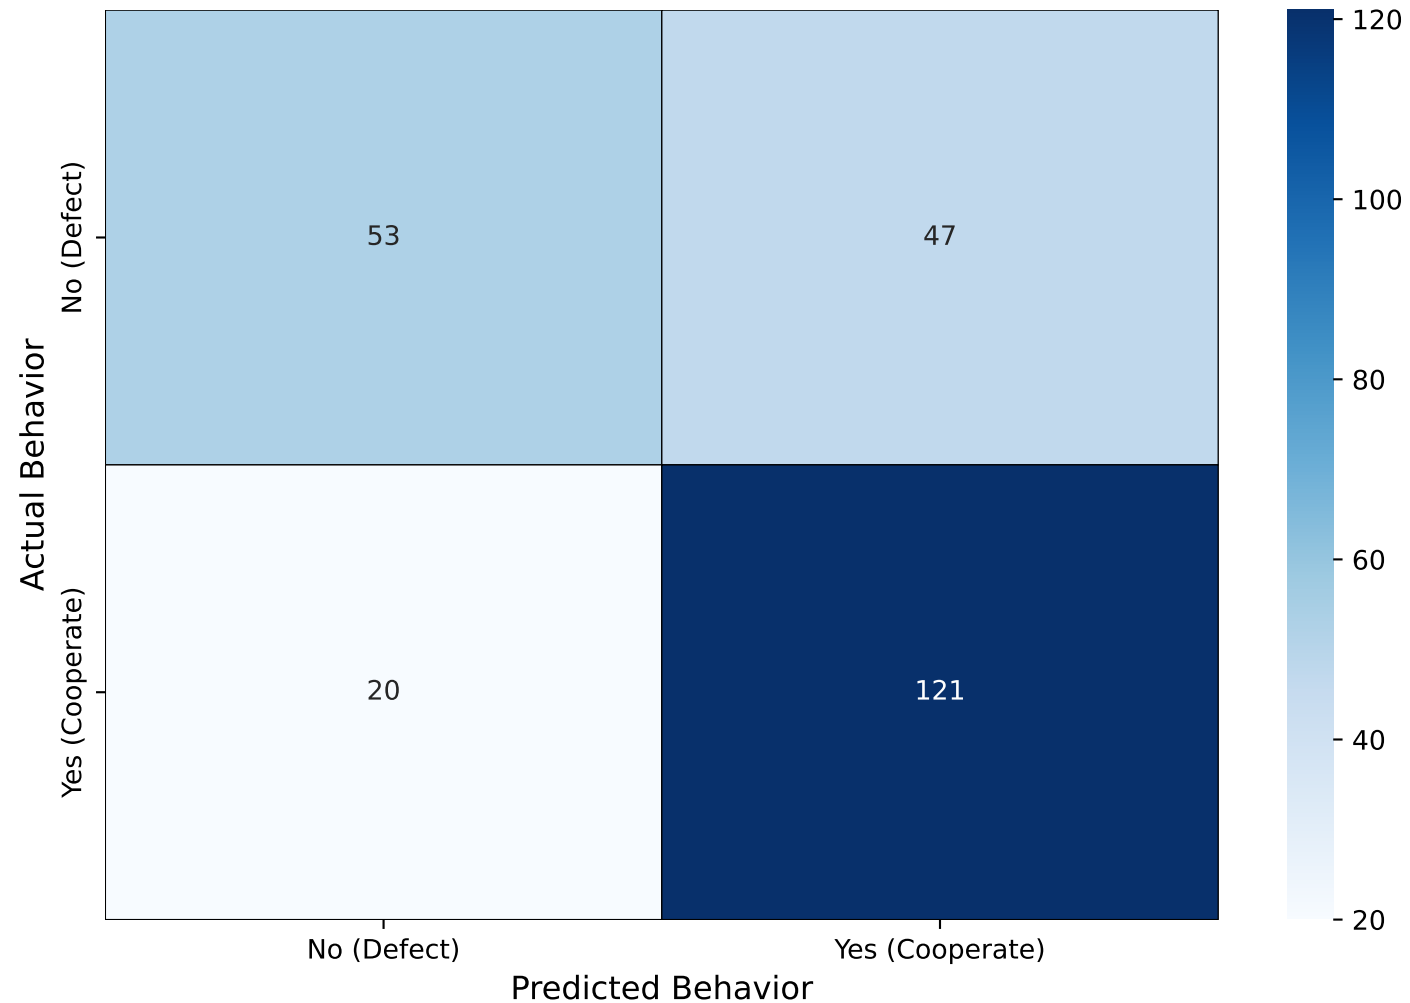

Supplement: supplementary_material [file DeepSeek-V3_ZS_obfuscated_confusion.pdf › Supplementary Material/FindNICE Benchmark/visualizations/confusion_matrices/DeepSeek-V3_ZS_obfuscated_confusion.pdf]

CM: DeepSeek-V3  
ZS Prompt, Unmasked Program

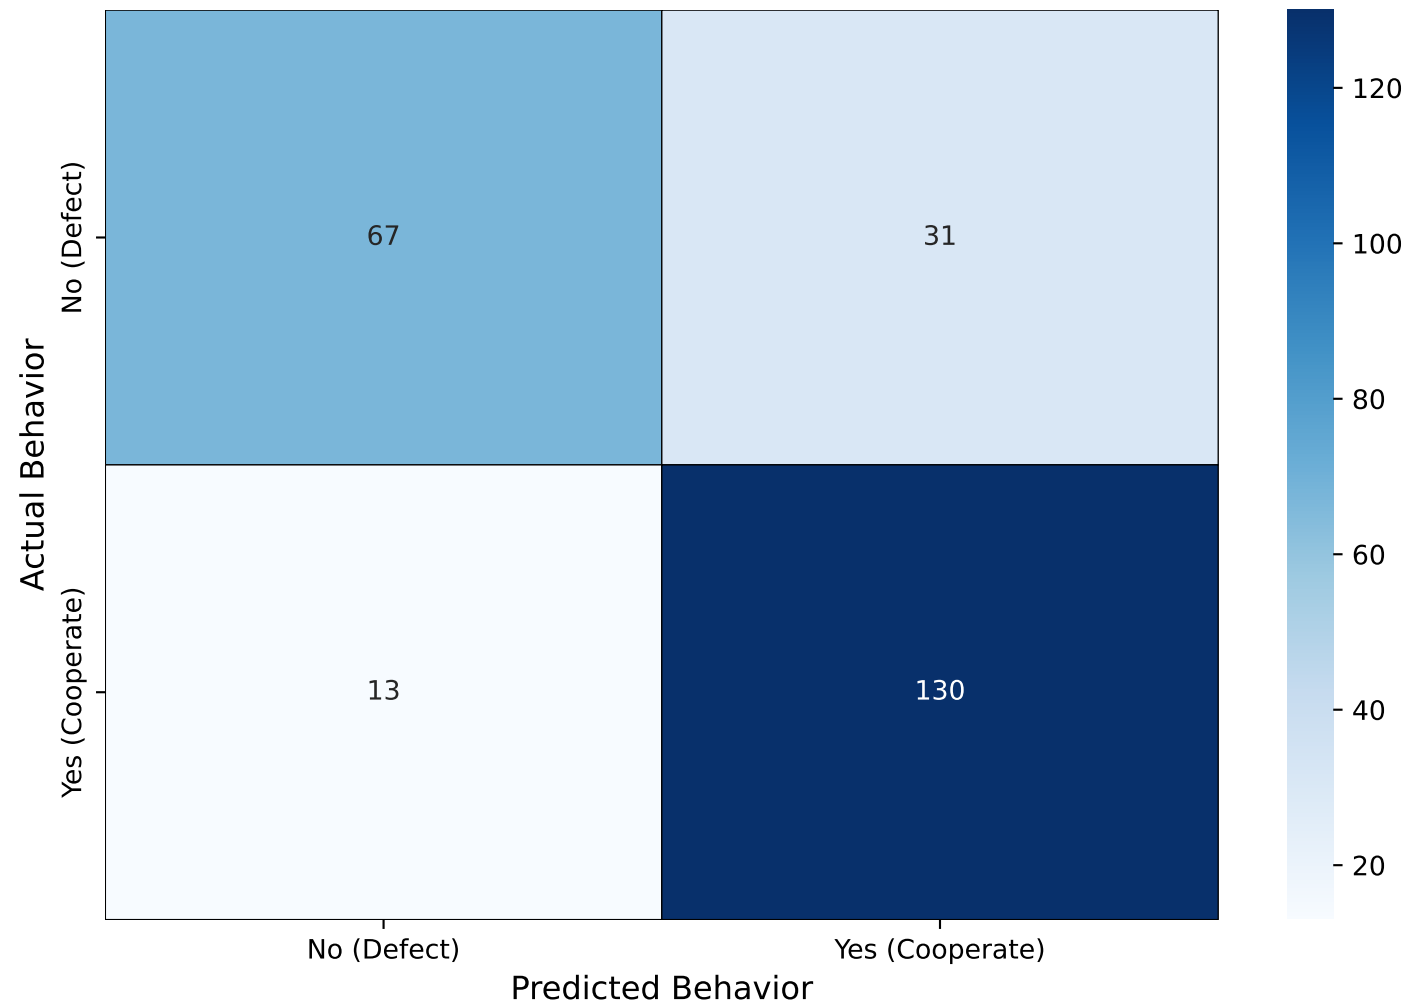

Supplement: supplementary_material [file DeepSeek-V3_ZS_unmasked_confusion.pdf › Supplementary Material/FindNICE Benchmark/visualizations/confusion_matrices/DeepSeek-V3_ZS_unmasked_confusion.pdf]

CM: GPT-4.1  
COT Prompt, Masked Program

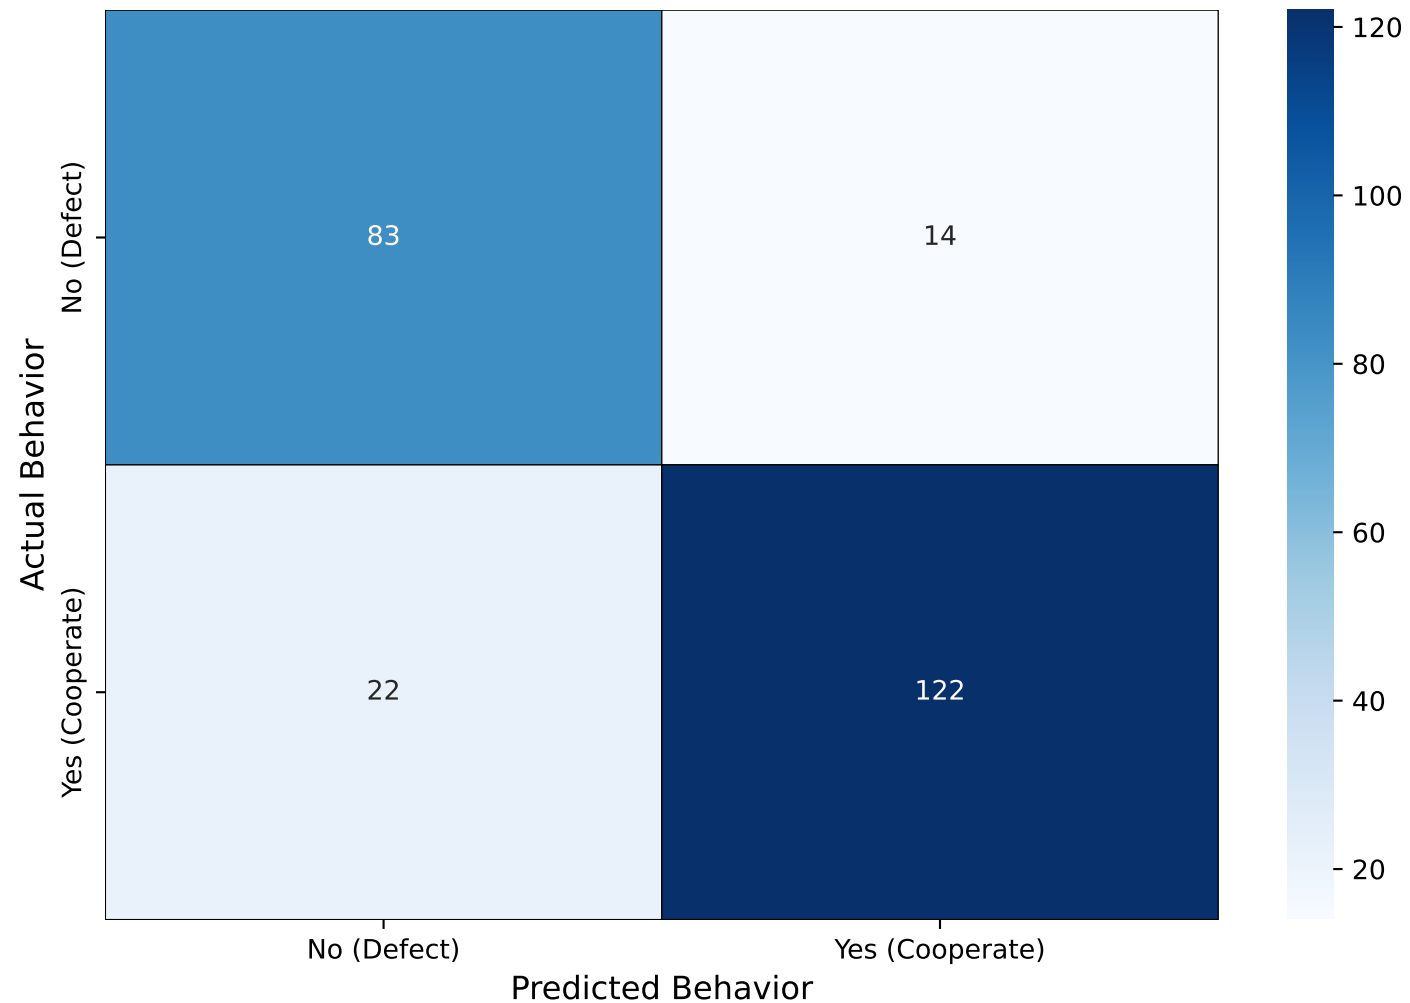

Supplement: supplementary_material [file GPT-4.1_COT_masked_confusion.pdf › Supplementary Material/FindNICE Benchmark/visualizations/confusion_matrices/GPT-4.1_COT_masked_confusion.pdf]

CM: GPT-4.1  
COT Prompt, Obfuscated Program

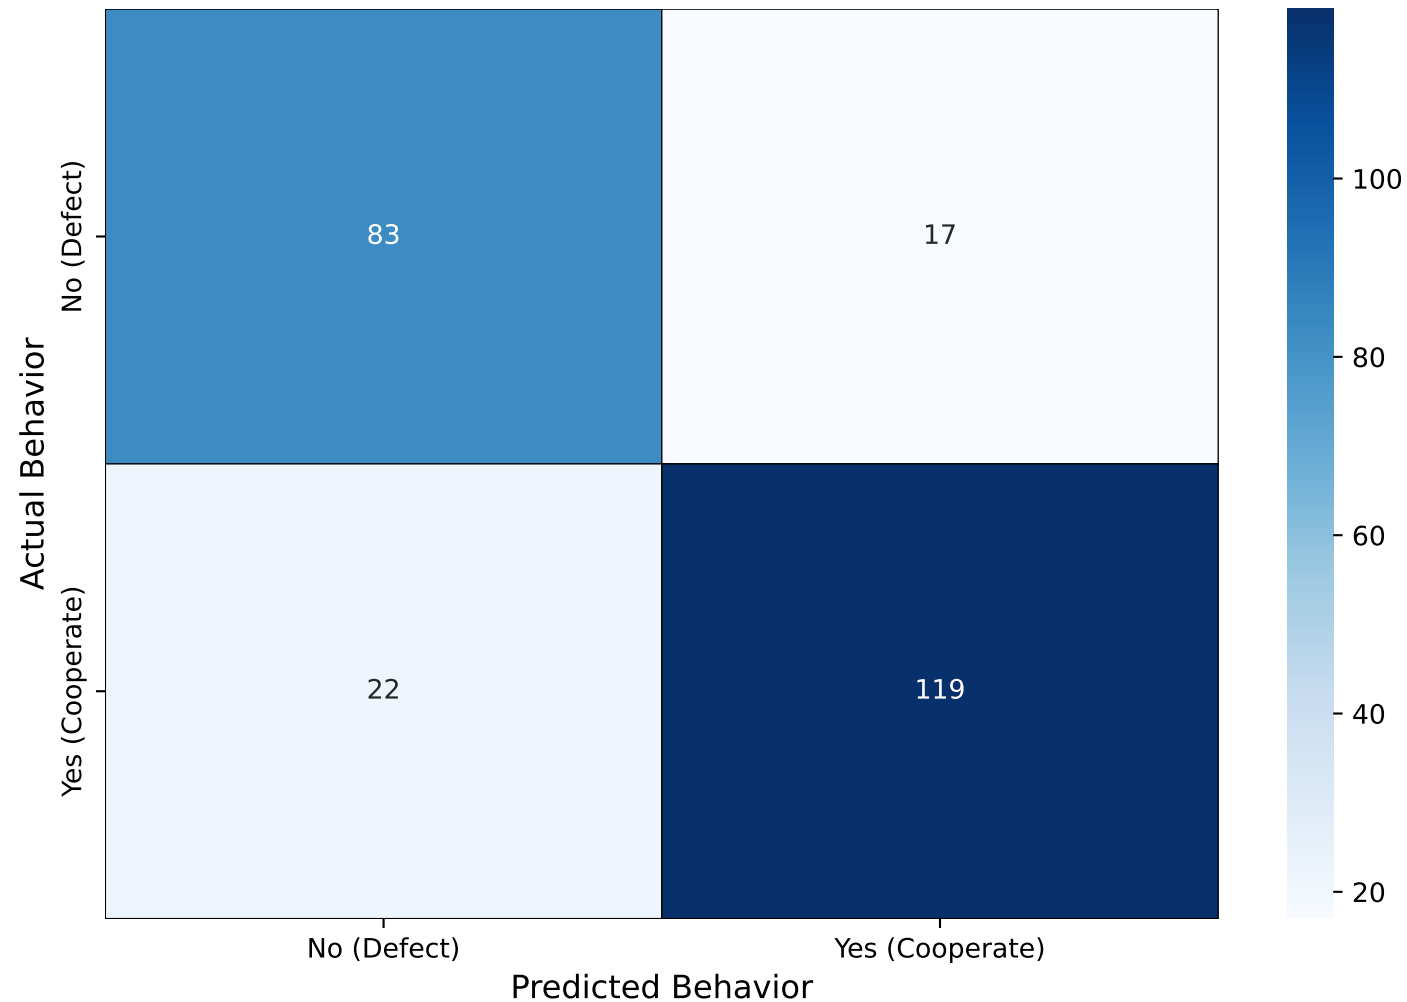

Supplement: supplementary_material [file GPT-4.1_COT_obfuscated_confusion.pdf › Supplementary Material/FindNICE Benchmark/visualizations/confusion_matrices/GPT-4.1_COT_obfuscated_confusion.pdf]

CM: GPT-4.1  
COT Prompt, Unmasked Program

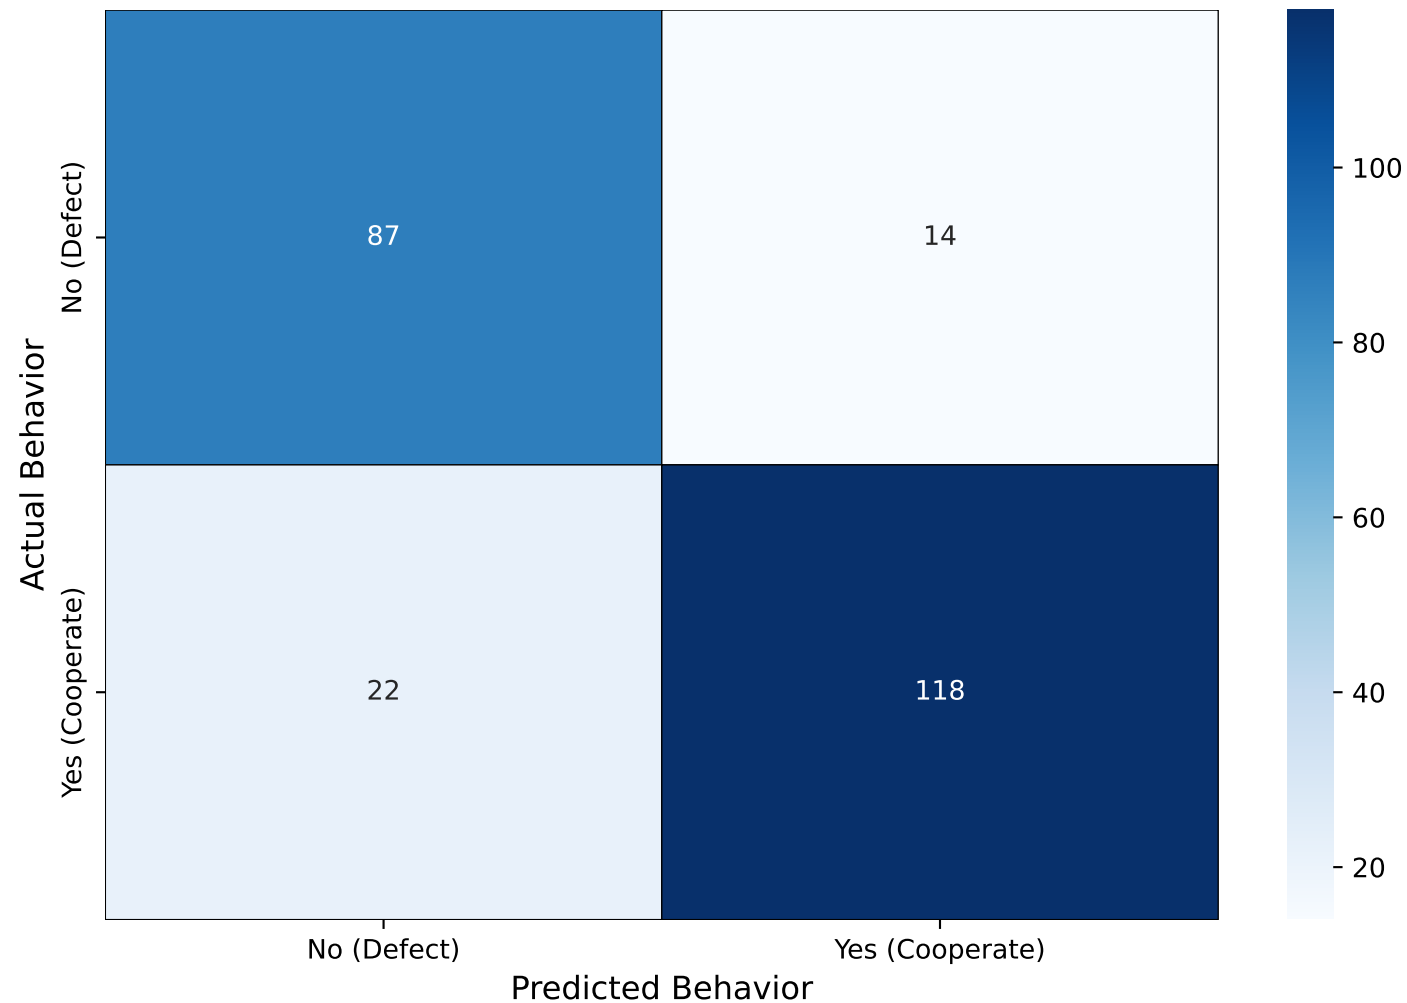

Supplement: supplementary_material [file GPT-4.1_COT_unmasked_confusion.pdf › Supplementary Material/FindNICE Benchmark/visualizations/confusion_matrices/GPT-4.1_COT_unmasked_confusion.pdf]

CM: GPT-4.1 Mini  
COT Prompt, Masked Program

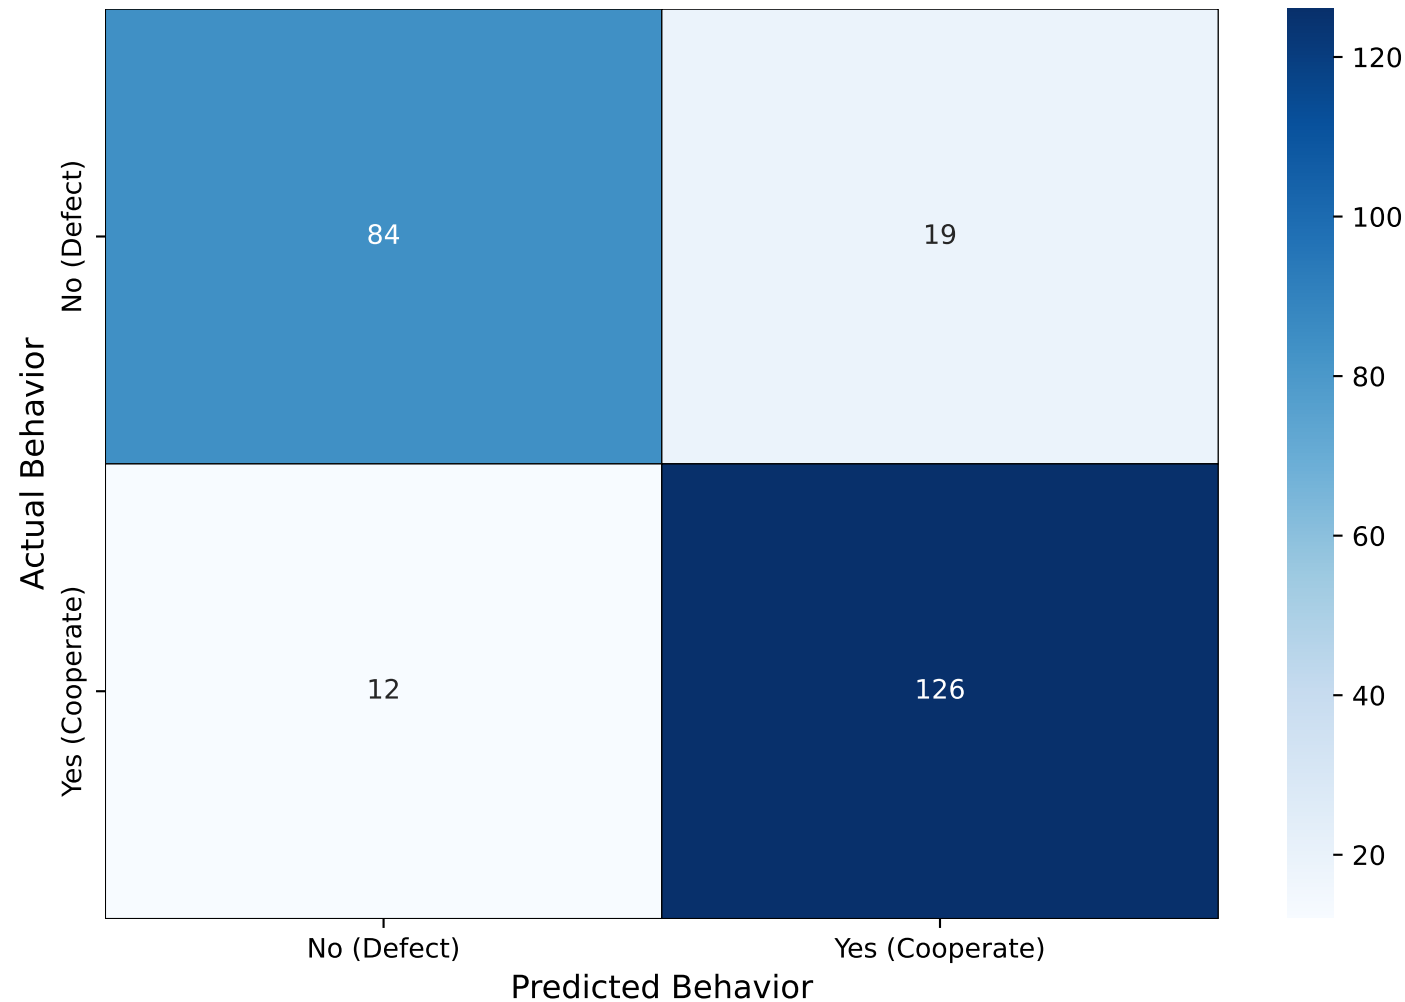

Supplement: supplementary_material [file GPT-4.1_Mini_COT_masked_confusion.pdf › Supplementary Material/FindNICE Benchmark/visualizations/confusion_matrices/GPT-4.1_Mini_COT_masked_confusion.pdf]

CM: GPT-4.1 Mini  
COT Prompt, Obfuscated Program

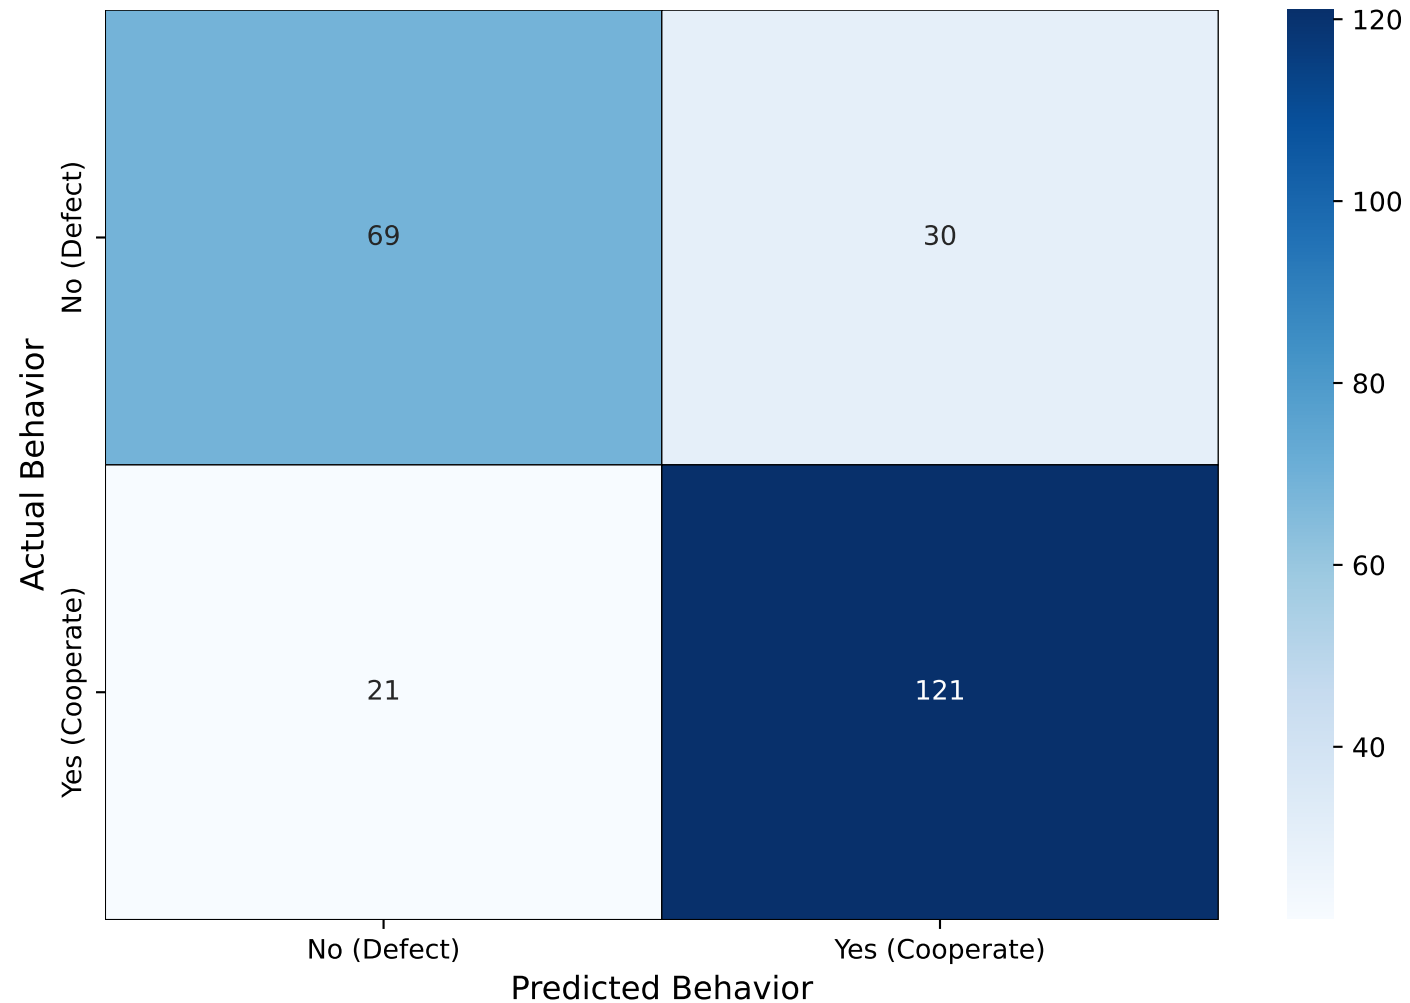

Supplement: supplementary_material [file GPT-4.1_Mini_COT_obfuscated_confusion.pdf › Supplementary Material/FindNICE Benchmark/visualizations/confusion_matrices/GPT-4.1_Mini_COT_obfuscated_confusion.pdf]

CM: GPT-4.1 Mini  
COT Prompt, Unmasked Program

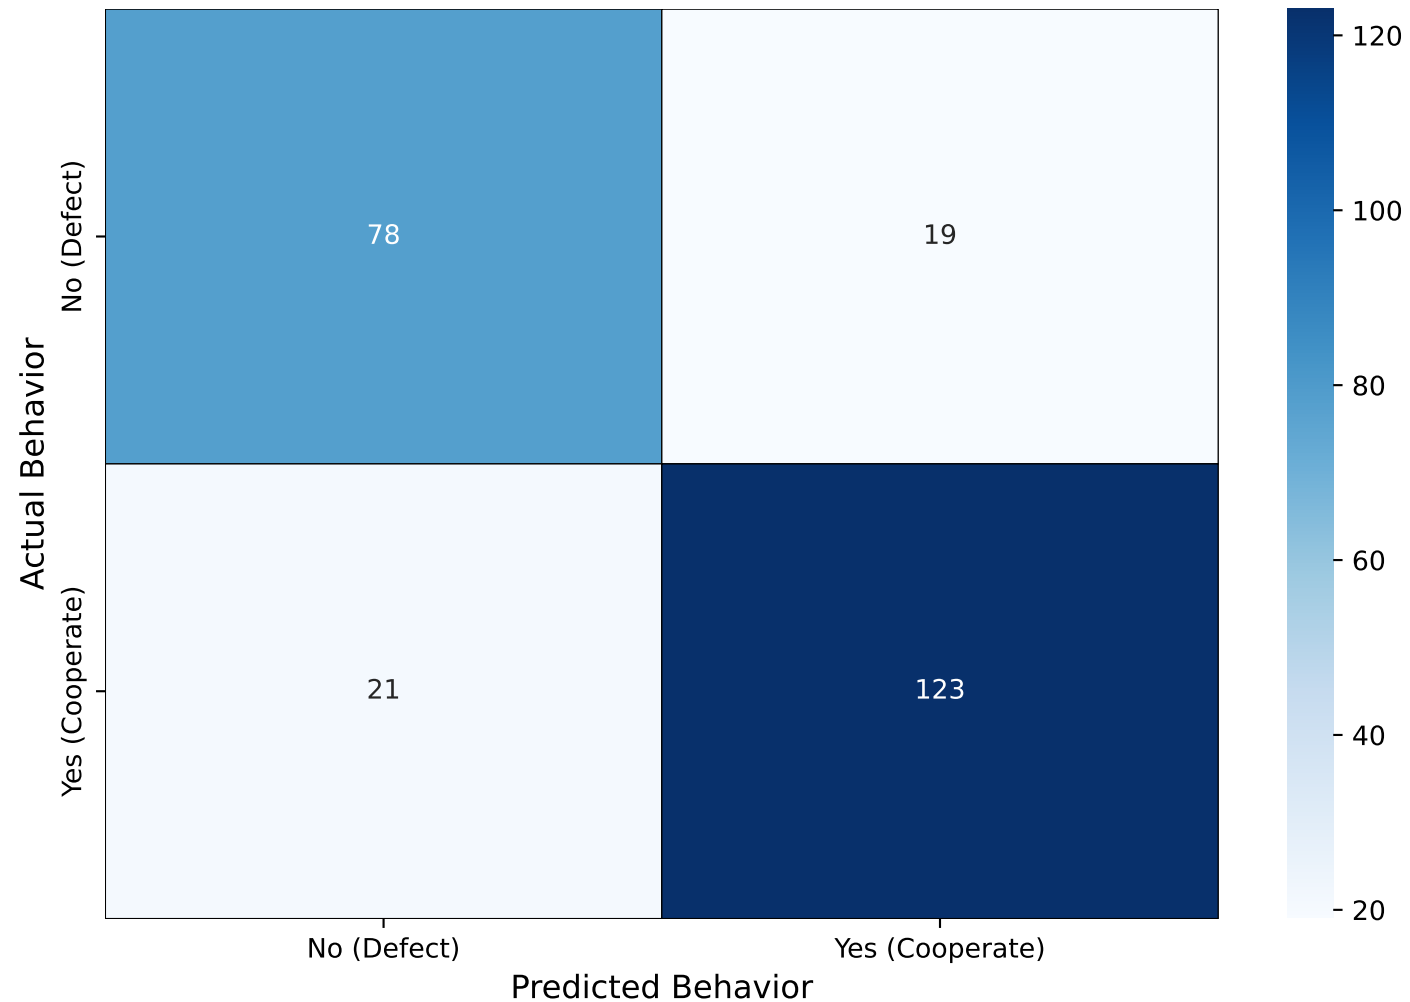

Supplement: supplementary_material [file GPT-4.1_Mini_COT_unmasked_confusion.pdf › Supplementary Material/FindNICE Benchmark/visualizations/confusion_matrices/GPT-4.1_Mini_COT_unmasked_confusion.pdf]

CM: GPT-4.1 Mini  
ZS Prompt, Masked Program

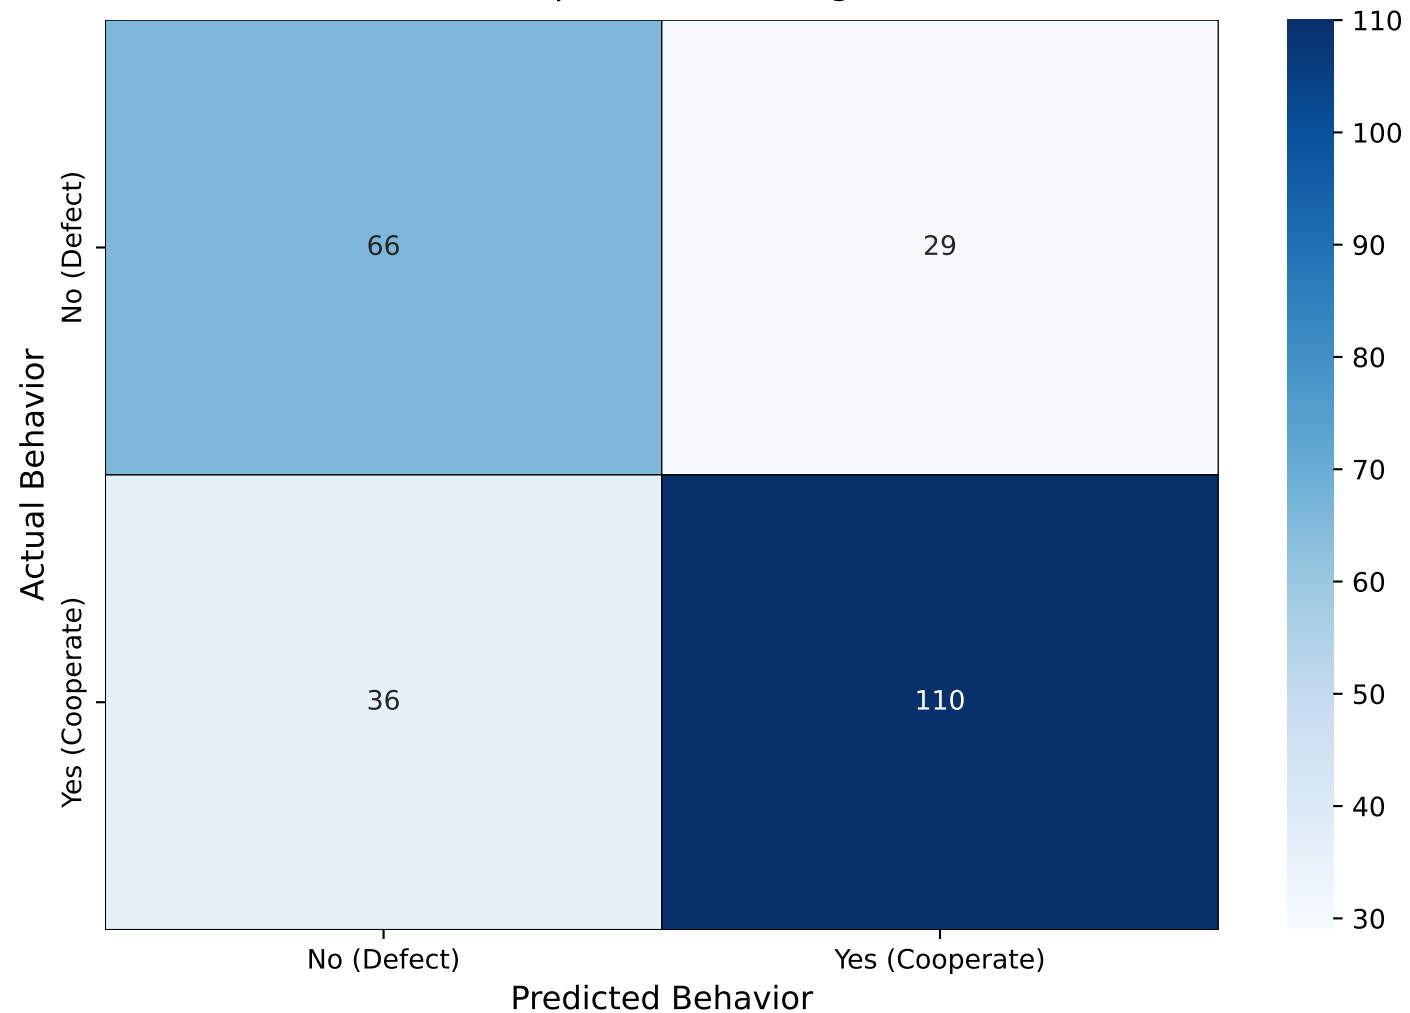

Supplement: supplementary_material [file GPT-4.1_Mini_ZS_masked_confusion.pdf › Supplementary Material/FindNICE Benchmark/visualizations/confusion_matrices/GPT-4.1_Mini_ZS_masked_confusion.pdf]

CM: GPT-4.1 Mini  
ZS Prompt, Obfuscated Program

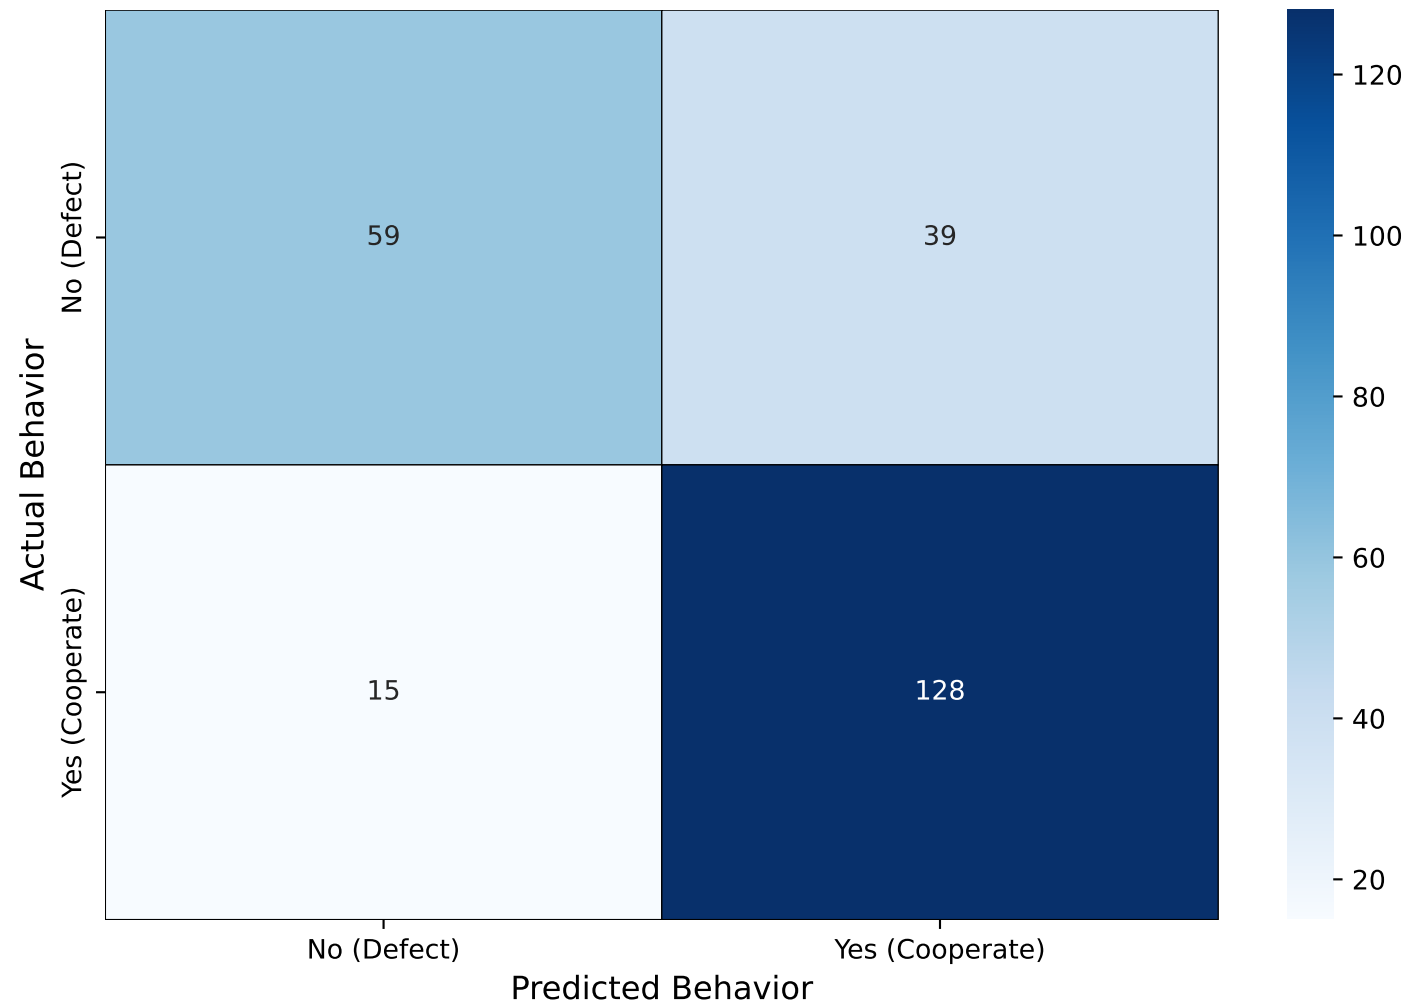

Supplement: supplementary_material [file GPT-4.1_Mini_ZS_obfuscated_confusion.pdf › Supplementary Material/FindNICE Benchmark/visualizations/confusion_matrices/GPT-4.1_Mini_ZS_obfuscated_confusion.pdf]

CM: GPT-4.1 Mini  
ZS Prompt, Unmasked Program

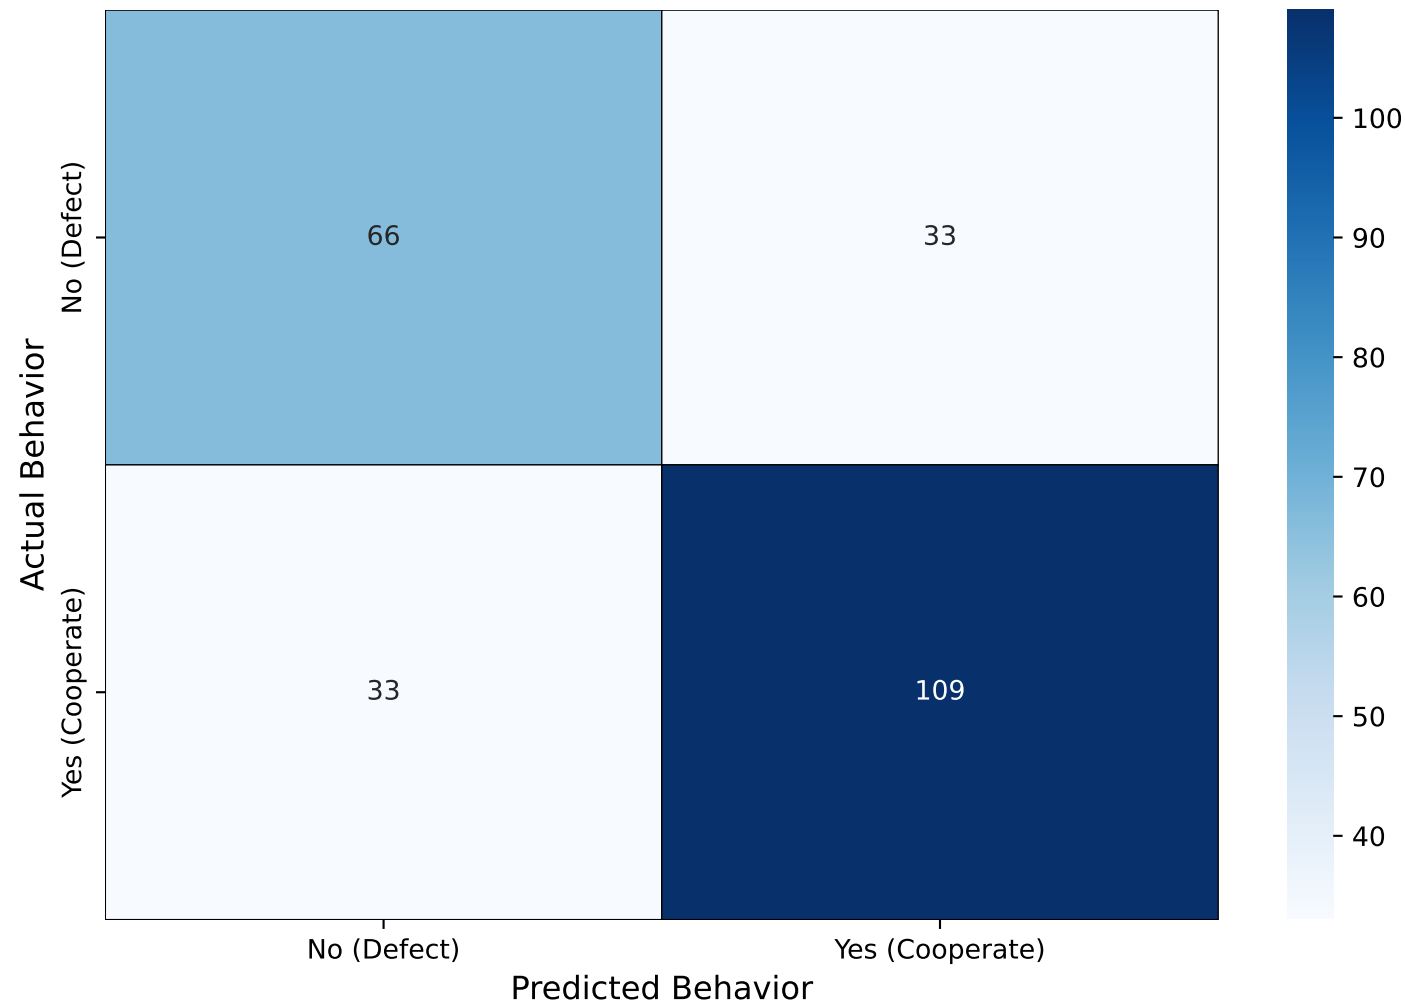

Supplement: supplementary_material [file GPT-4.1_Mini_ZS_unmasked_confusion.pdf › Supplementary Material/FindNICE Benchmark/visualizations/confusion_matrices/GPT-4.1_Mini_ZS_unmasked_confusion.pdf]

CM: GPT-4.1 Nano  
COT Prompt, Masked Program

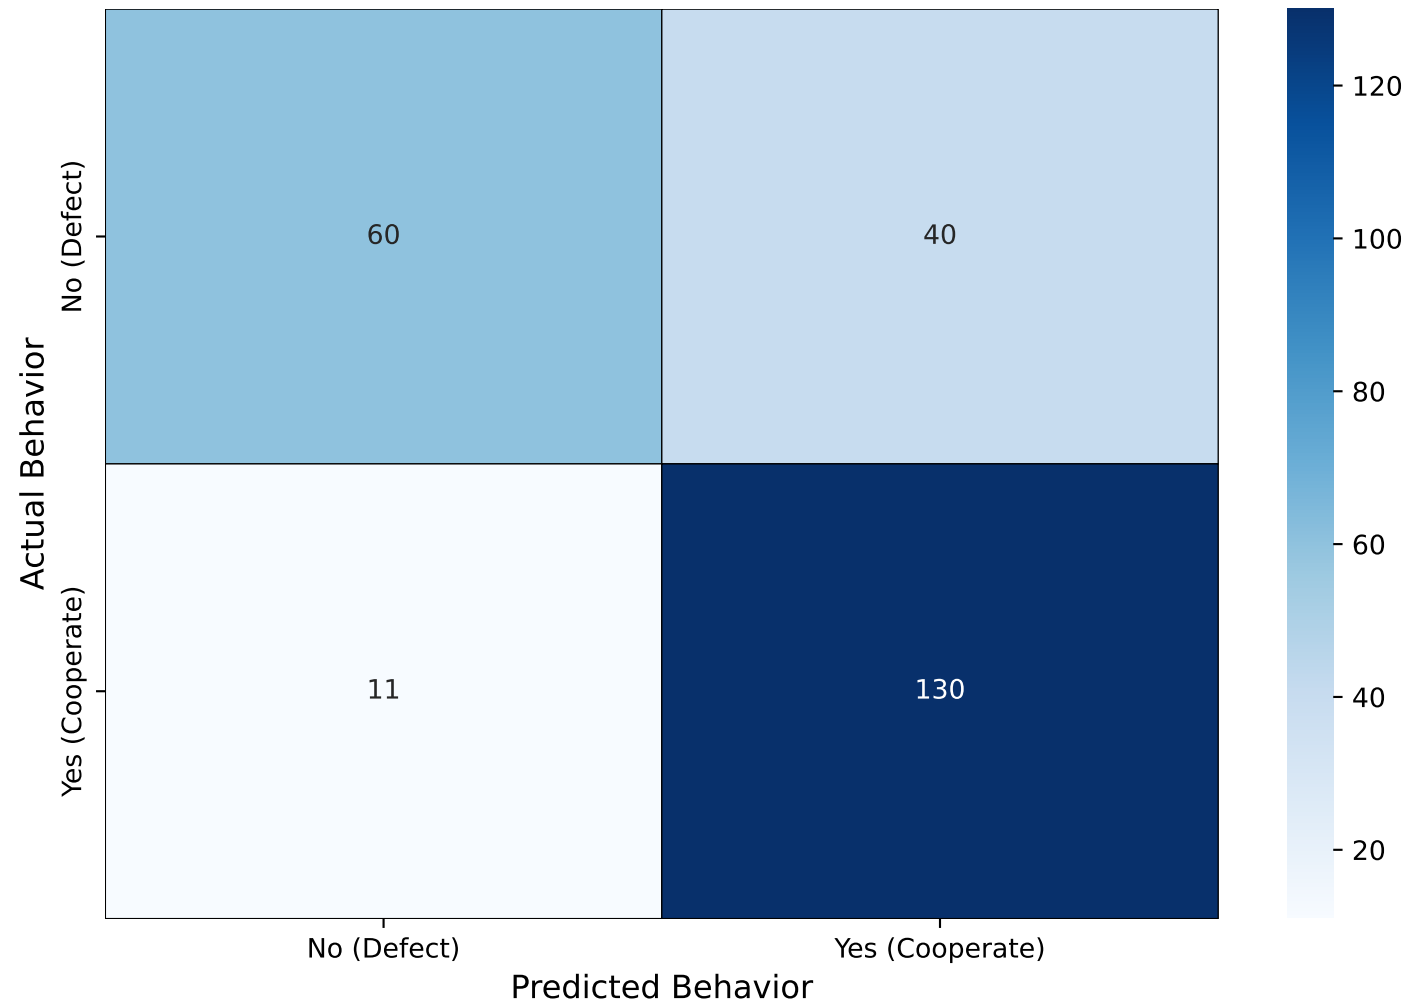

Supplement: supplementary_material [file GPT-4.1_Nano_COT_masked_confusion.pdf › Supplementary Material/FindNICE Benchmark/visualizations/confusion_matrices/GPT-4.1_Nano_COT_masked_confusion.pdf]

CM: GPT-4.1 Nano  
COT Prompt, Obfuscated Program

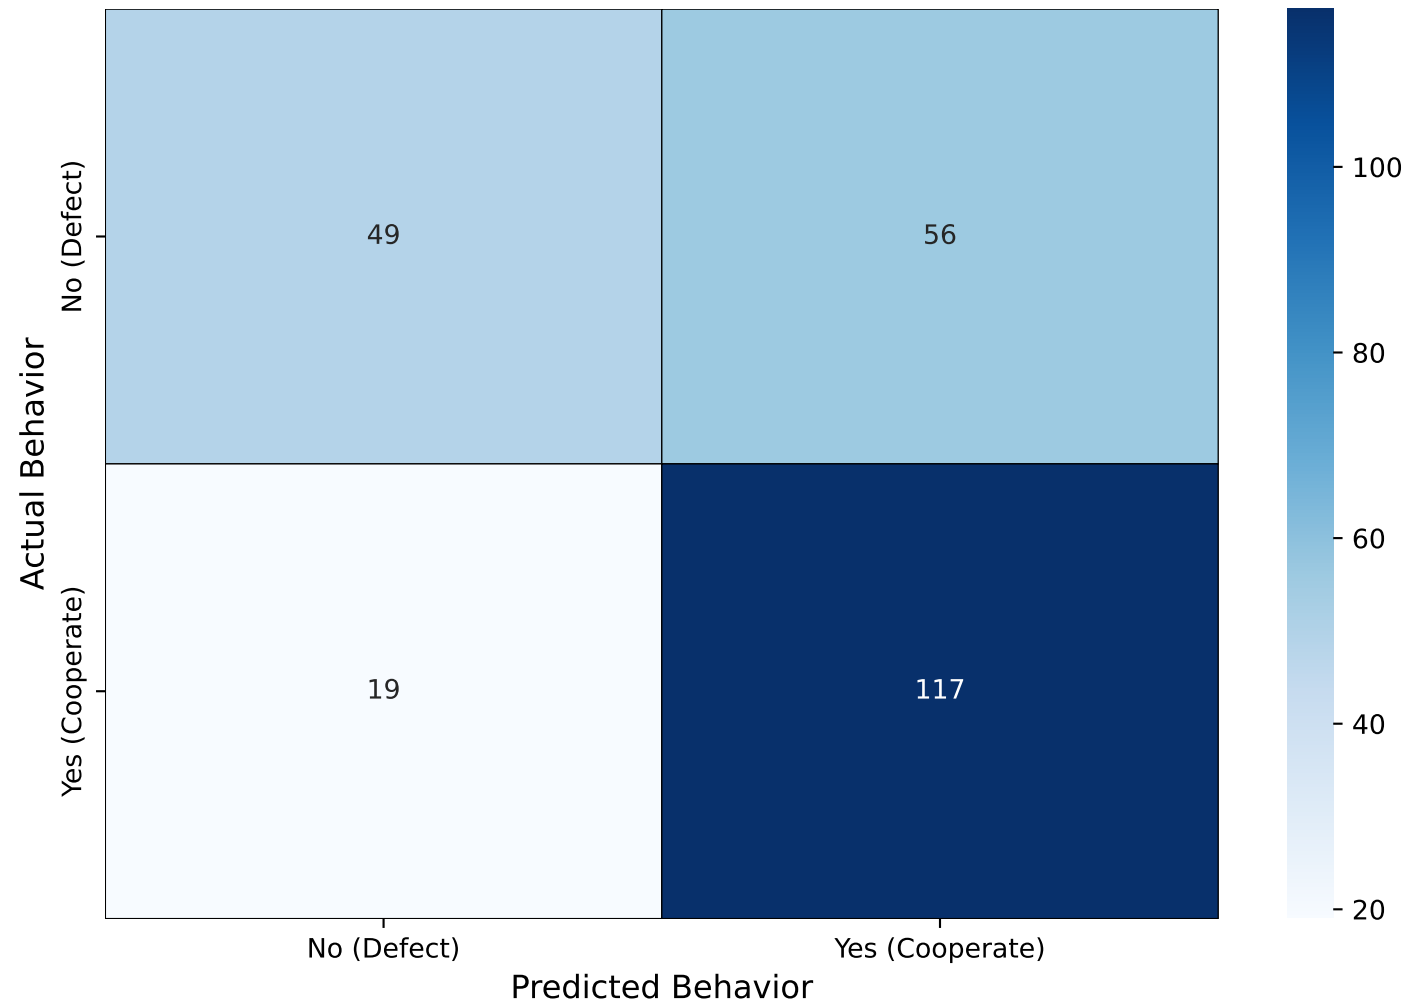

Supplement: supplementary_material [file GPT-4.1_Nano_COT_obfuscated_confusion.pdf › Supplementary Material/FindNICE Benchmark/visualizations/confusion_matrices/GPT-4.1_Nano_COT_obfuscated_confusion.pdf]

CM: GPT-4.1 Nano  
COT Prompt, Unmasked Program

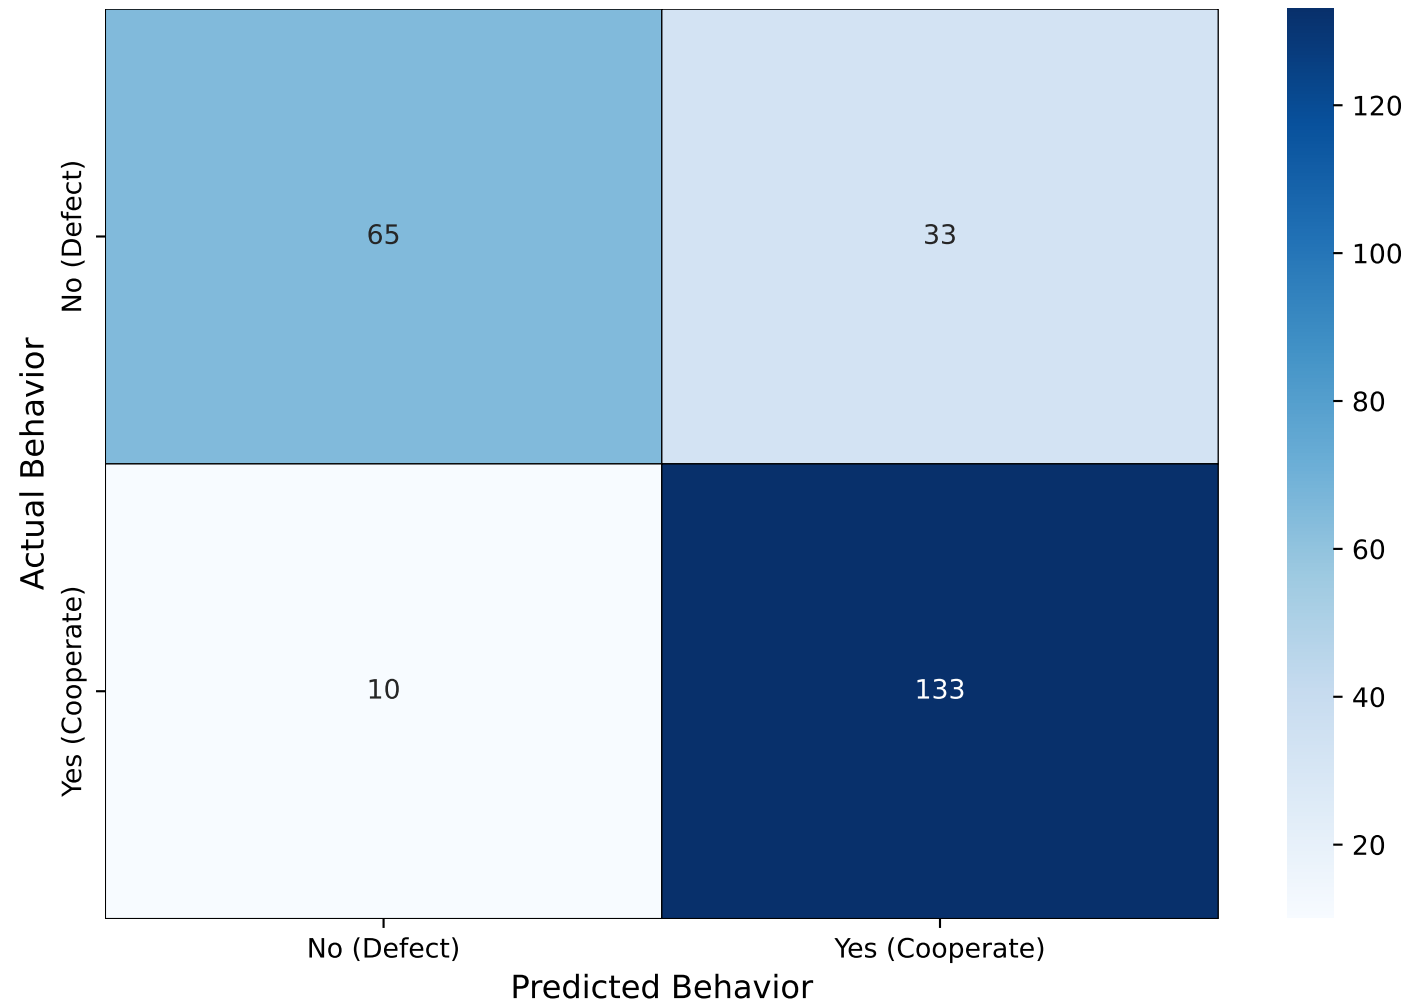

Supplement: supplementary_material [file GPT-4.1_Nano_COT_unmasked_confusion.pdf › Supplementary Material/FindNICE Benchmark/visualizations/confusion_matrices/GPT-4.1_Nano_COT_unmasked_confusion.pdf]

CM: GPT-4.1 Nano  
ZS Prompt, Masked Program

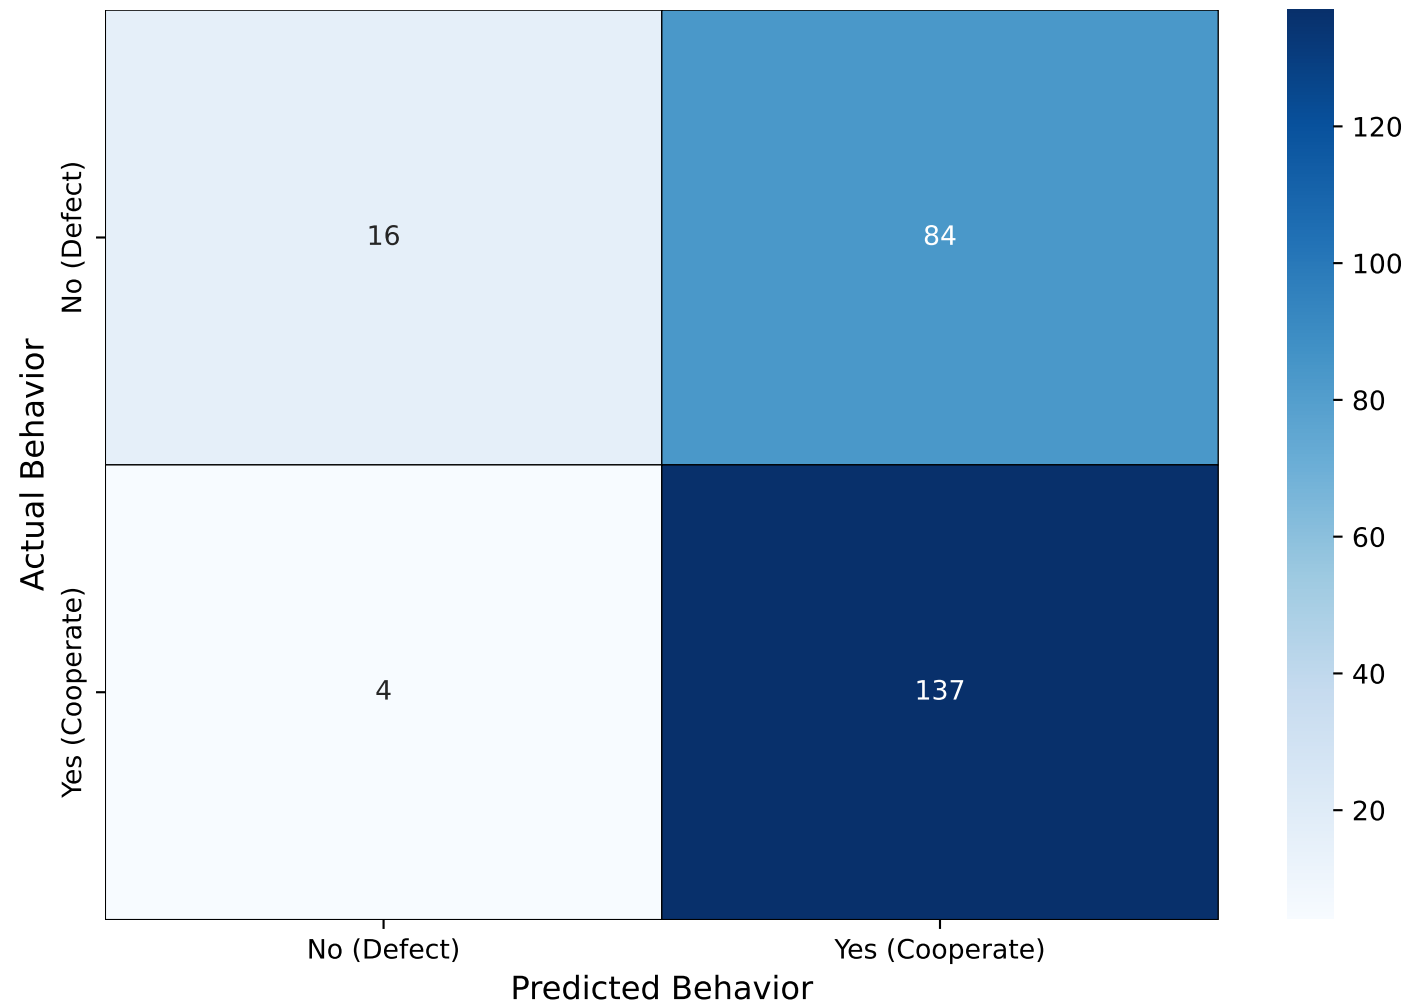

Supplement: supplementary_material [file GPT-4.1_Nano_ZS_masked_confusion.pdf › Supplementary Material/FindNICE Benchmark/visualizations/confusion_matrices/GPT-4.1_Nano_ZS_masked_confusion.pdf]

CM: GPT-4.1 Nano  
ZS Prompt, Obfuscated Program

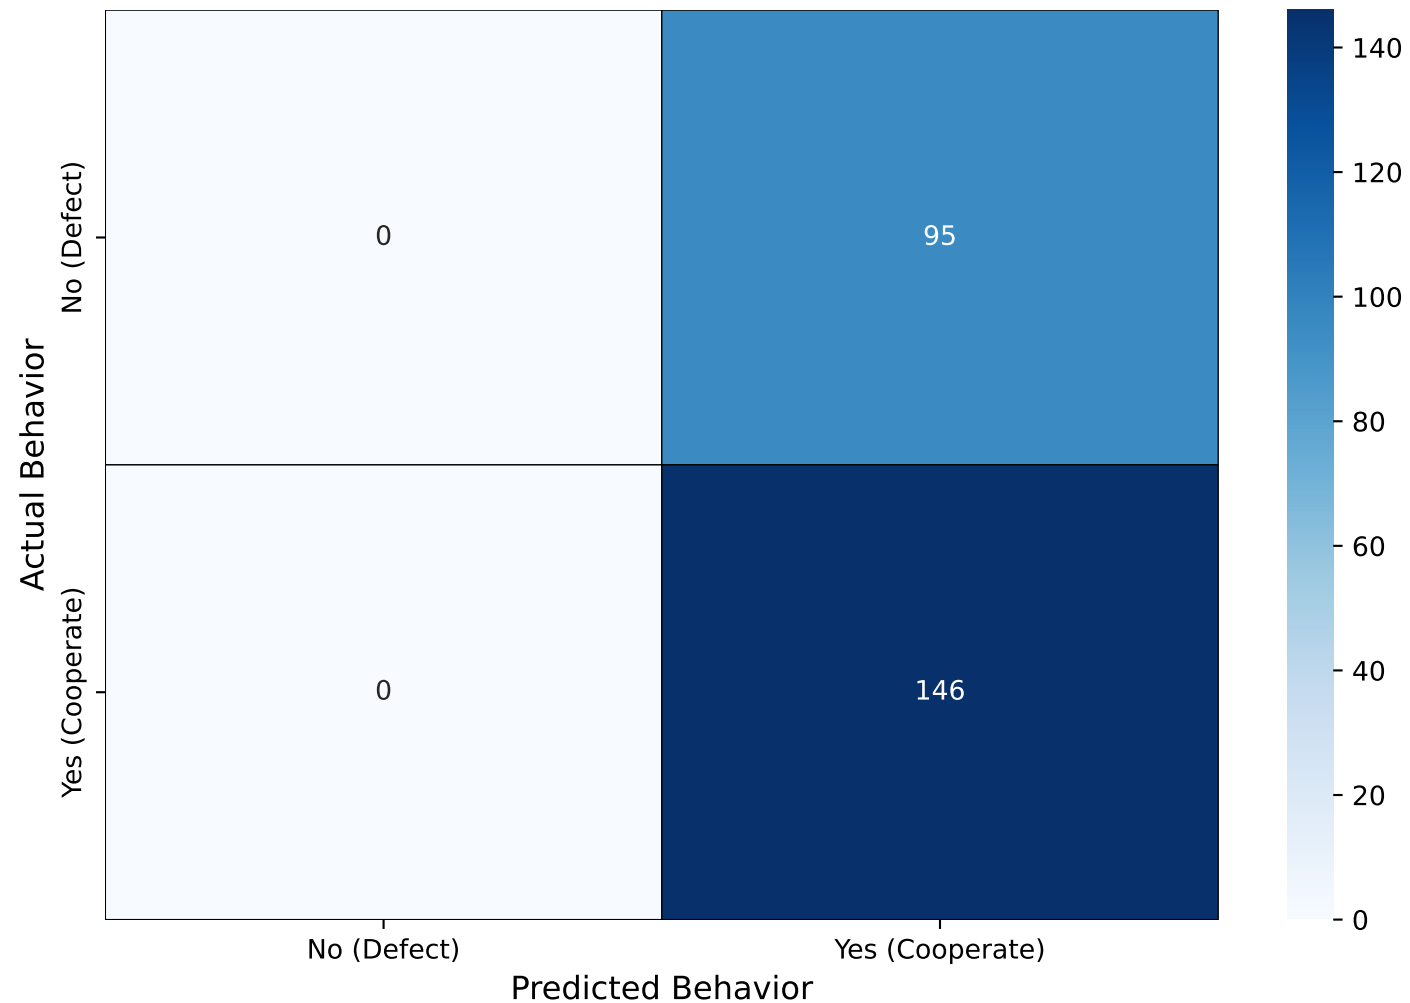

Supplement: supplementary_material [file GPT-4.1_Nano_ZS_obfuscated_confusion.pdf › Supplementary Material/FindNICE Benchmark/visualizations/confusion_matrices/GPT-4.1_Nano_ZS_obfuscated_confusion.pdf]

CM: GPT-4.1 Nano  
ZS Prompt, Unmasked Program

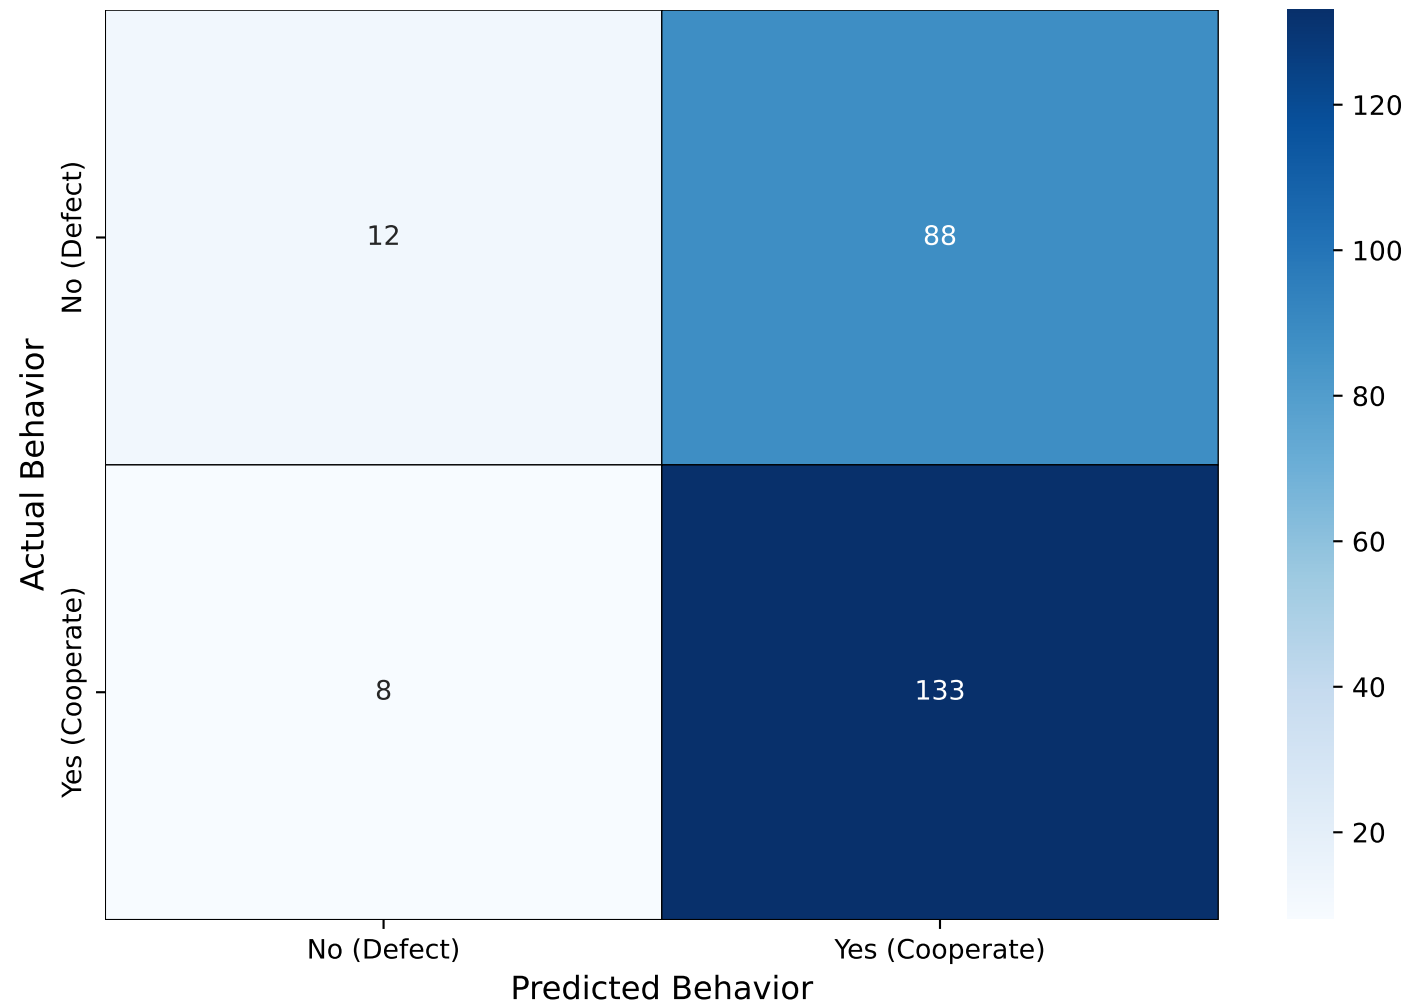

Supplement: supplementary_material [file GPT-4.1_Nano_ZS_unmasked_confusion.pdf › Supplementary Material/FindNICE Benchmark/visualizations/confusion_matrices/GPT-4.1_Nano_ZS_unmasked_confusion.pdf]

CM: GPT-4.1  
ZS Prompt, Masked Program

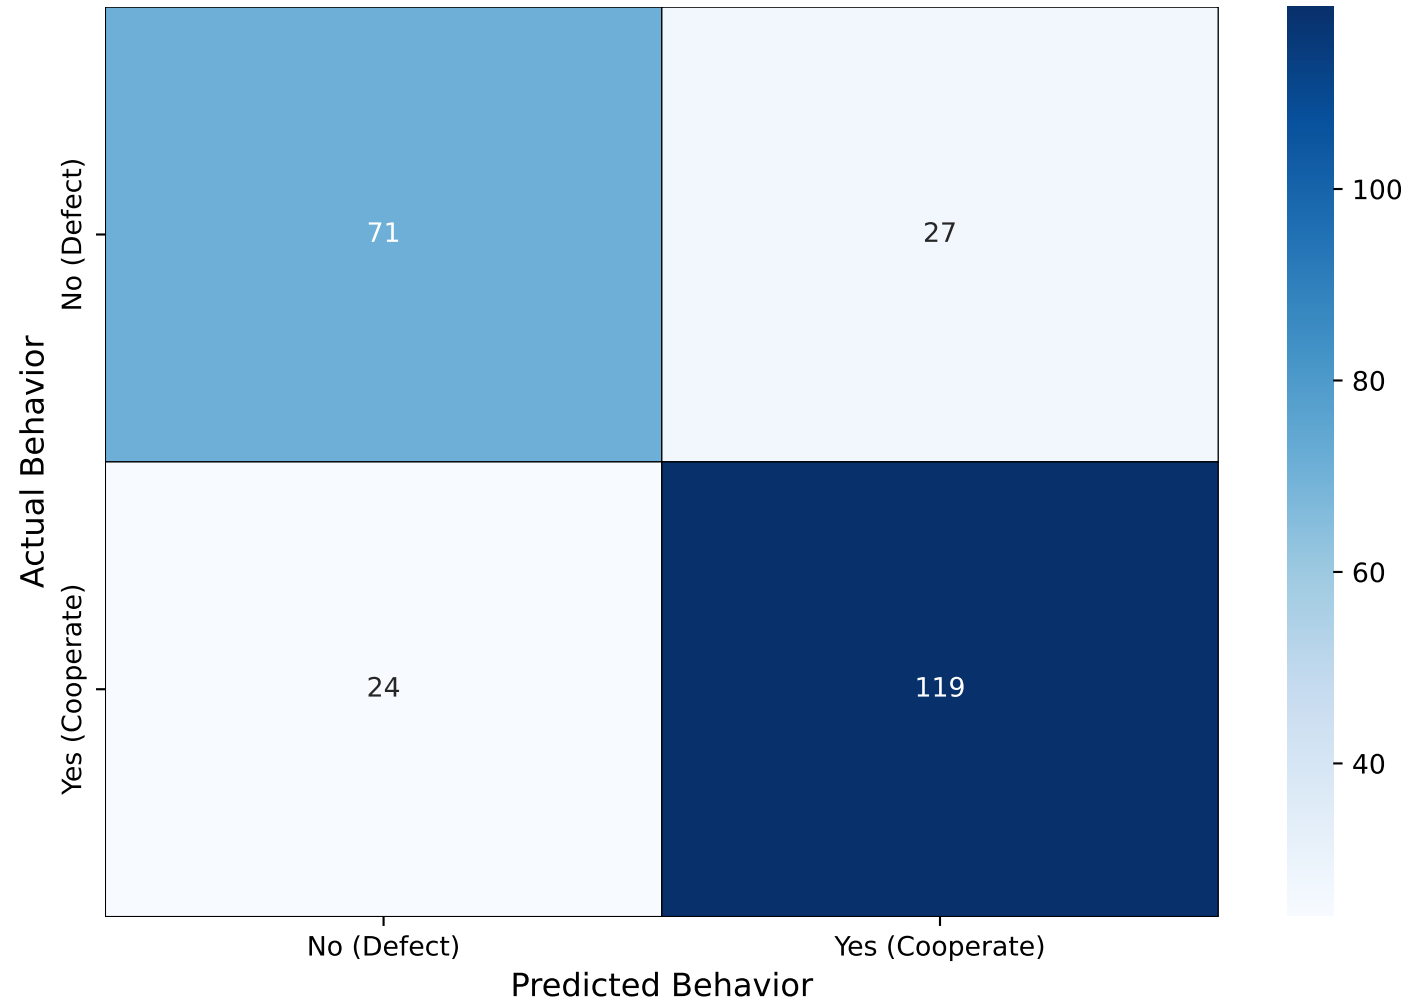

Supplement: supplementary_material [file GPT-4.1_ZS_masked_confusion.pdf › Supplementary Material/FindNICE Benchmark/visualizations/confusion_matrices/GPT-4.1_ZS_masked_confusion.pdf]

CM: GPT-4.1  
ZS Prompt, Obfuscated Program

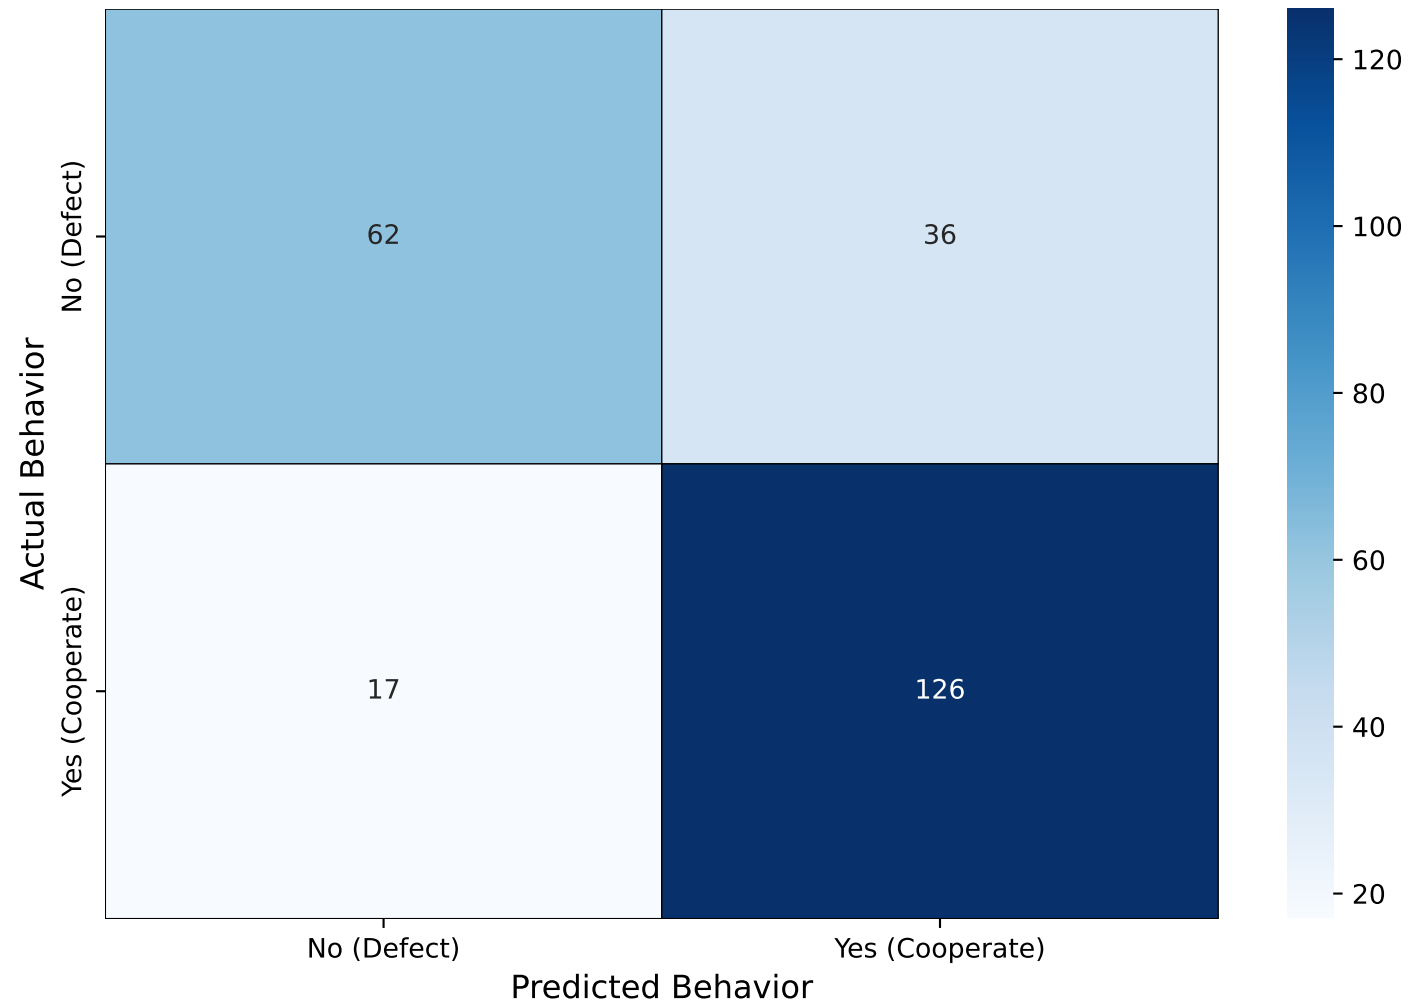

Supplement: supplementary_material [file GPT-4.1_ZS_obfuscated_confusion.pdf › Supplementary Material/FindNICE Benchmark/visualizations/confusion_matrices/GPT-4.1_ZS_obfuscated_confusion.pdf]

CM: GPT-4.1  
ZS Prompt, Unmasked Program

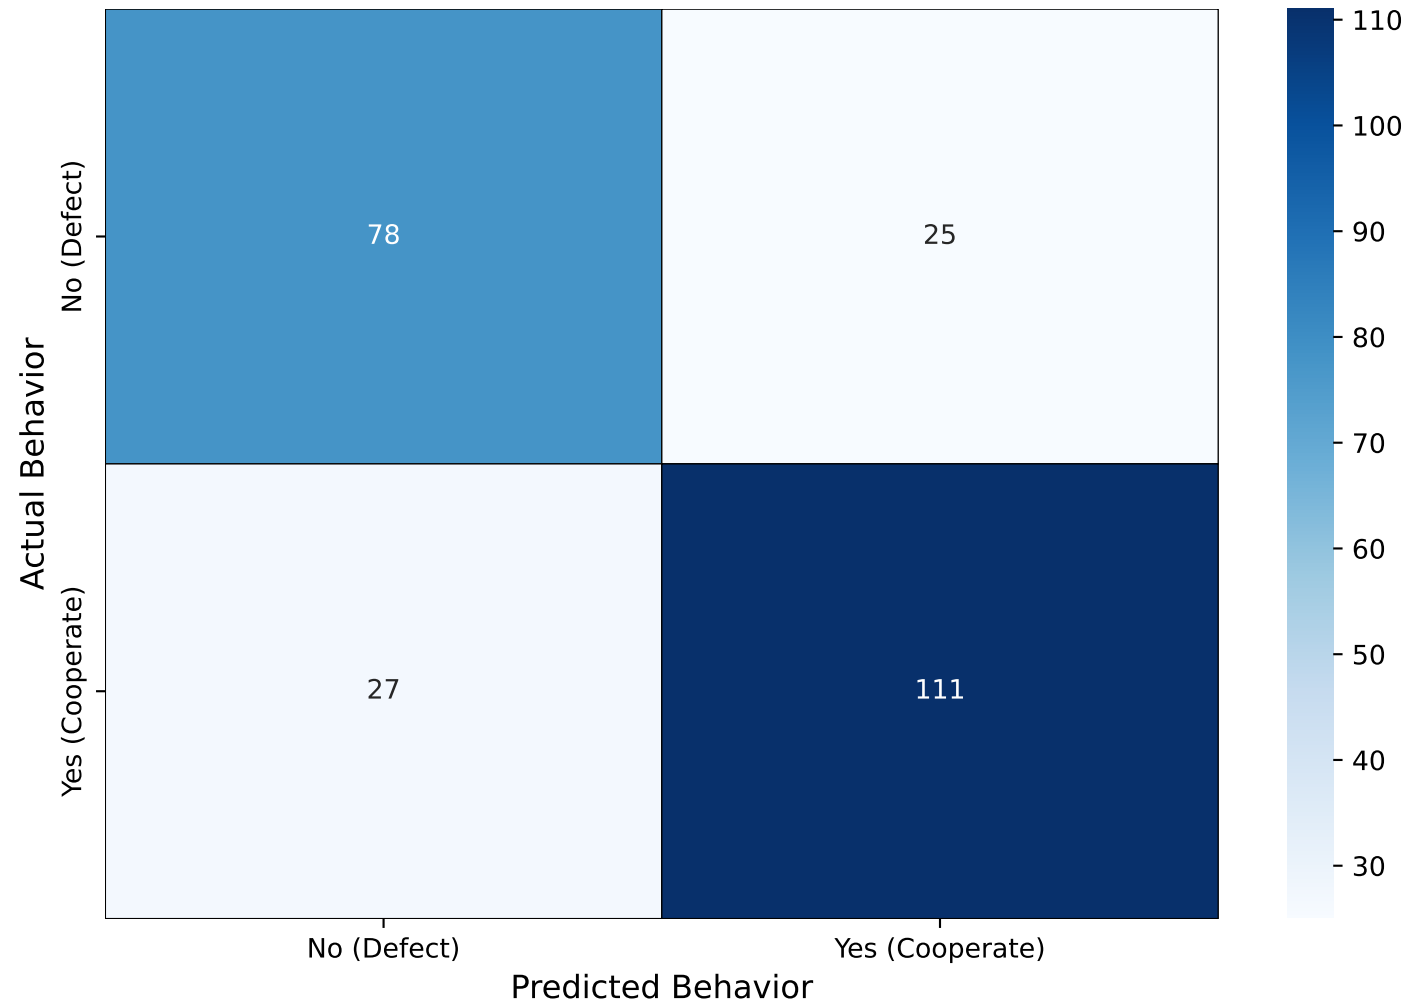

Supplement: supplementary_material [file GPT-4.1_ZS_unmasked_confusion.pdf › Supplementary Material/FindNICE Benchmark/visualizations/confusion_matrices/GPT-4.1_ZS_unmasked_confusion.pdf]

CM: GPT-4o Mini  
COT Prompt, Masked Program

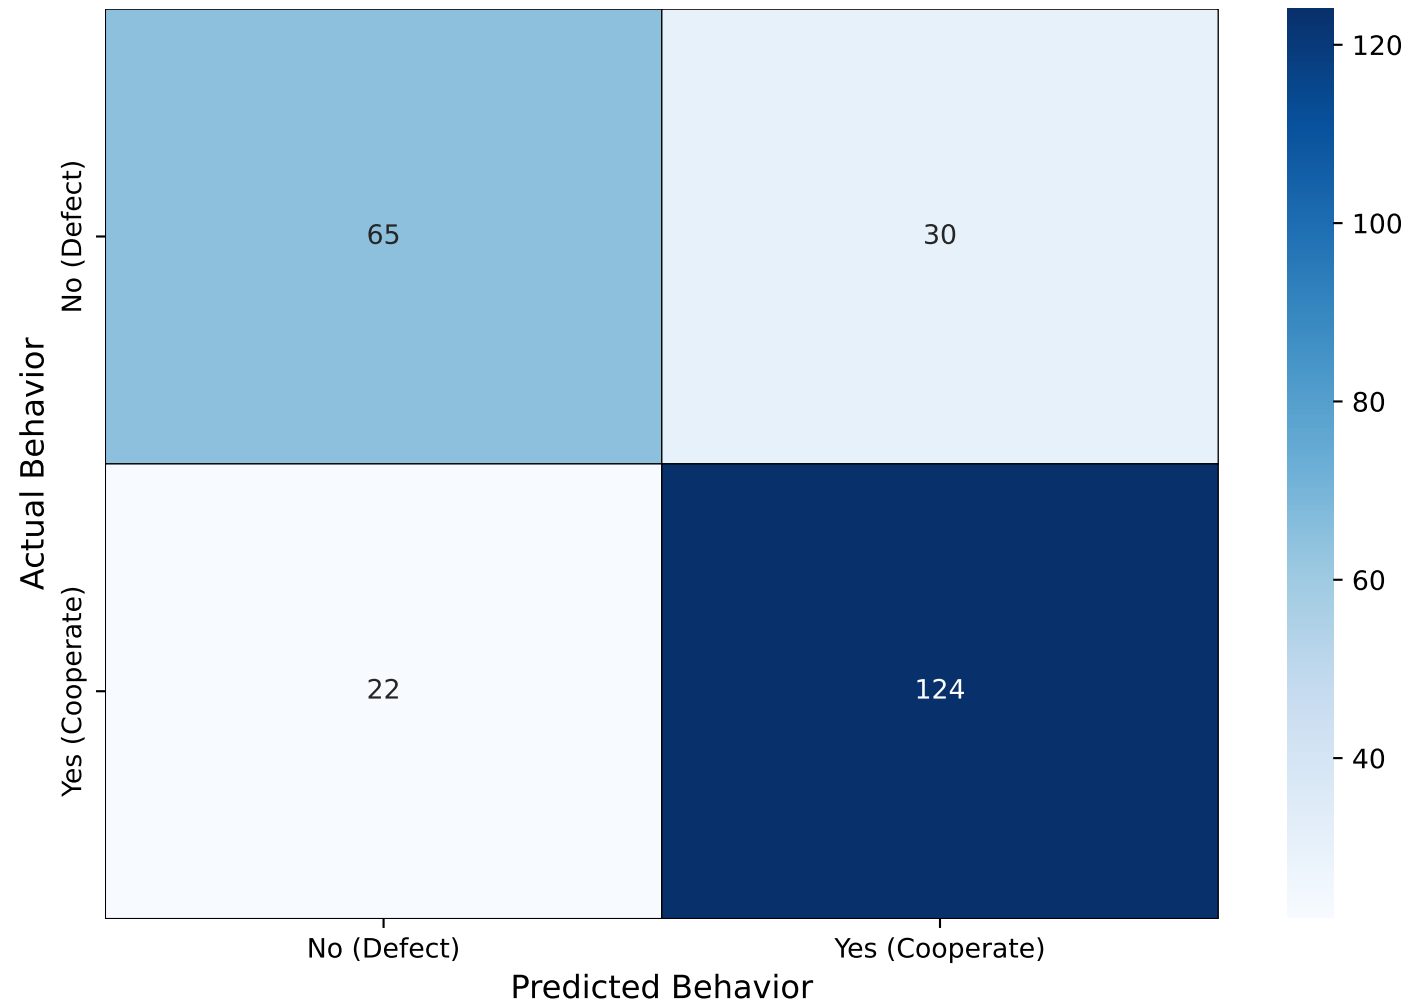

Supplement: supplementary_material [file GPT-4o_Mini_COT_masked_confusion.pdf › Supplementary Material/FindNICE Benchmark/visualizations/confusion_matrices/GPT-4o_Mini_COT_masked_confusion.pdf]

CM: GPT-4o Mini  
COT Prompt, Obfuscated Program

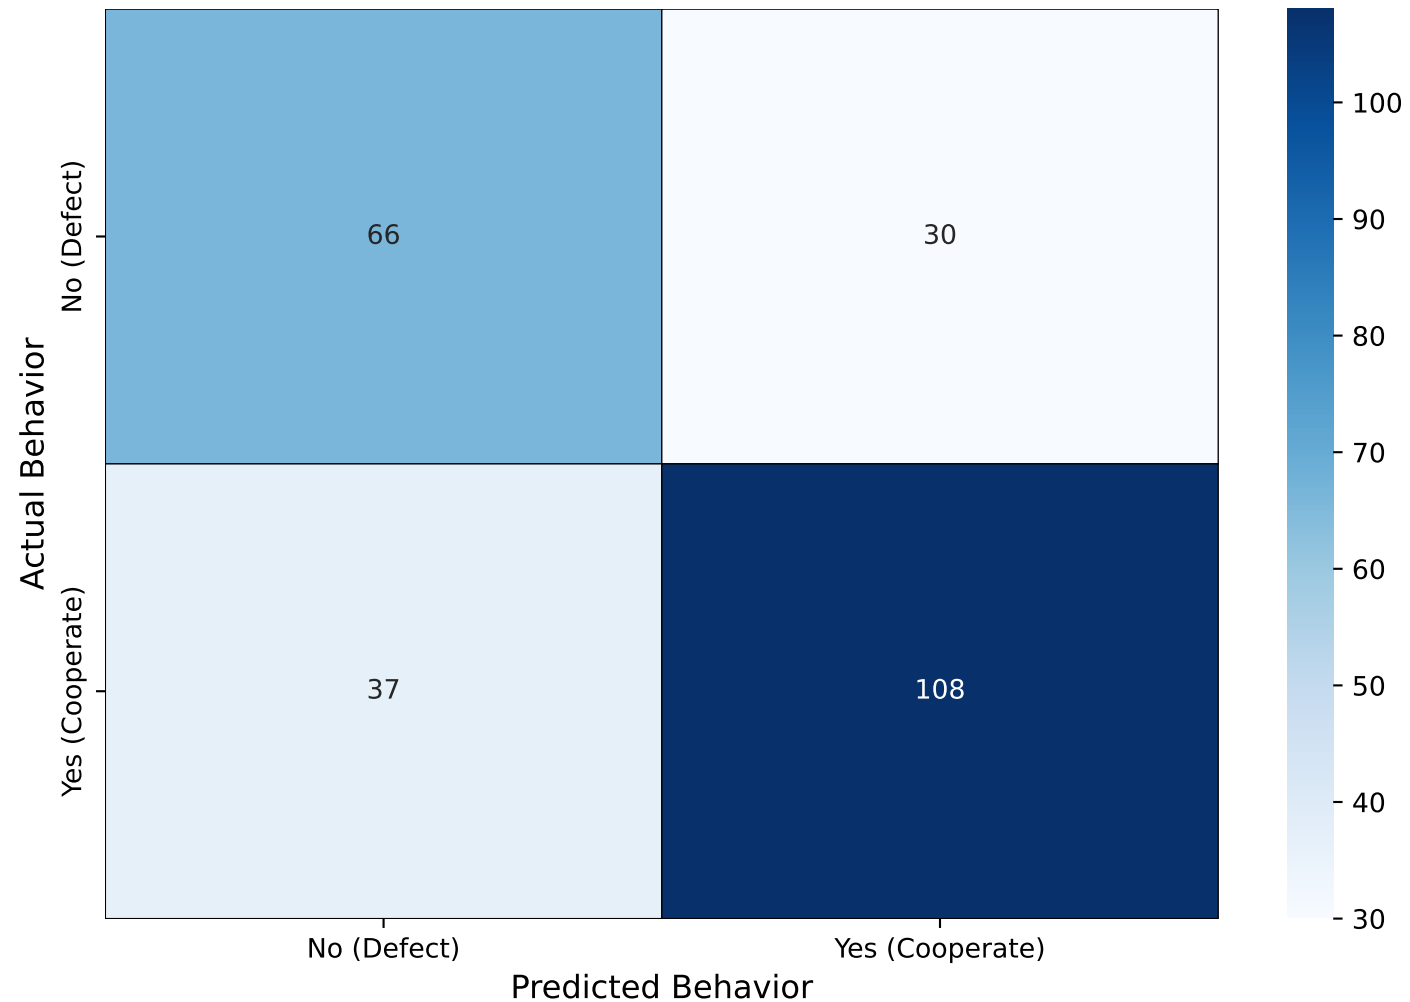

Supplement: supplementary_material [file GPT-4o_Mini_COT_obfuscated_confusion.pdf › Supplementary Material/FindNICE Benchmark/visualizations/confusion_matrices/GPT-4o_Mini_COT_obfuscated_confusion.pdf]

CM: GPT-4o Mini  
COT Prompt, Unmasked Program

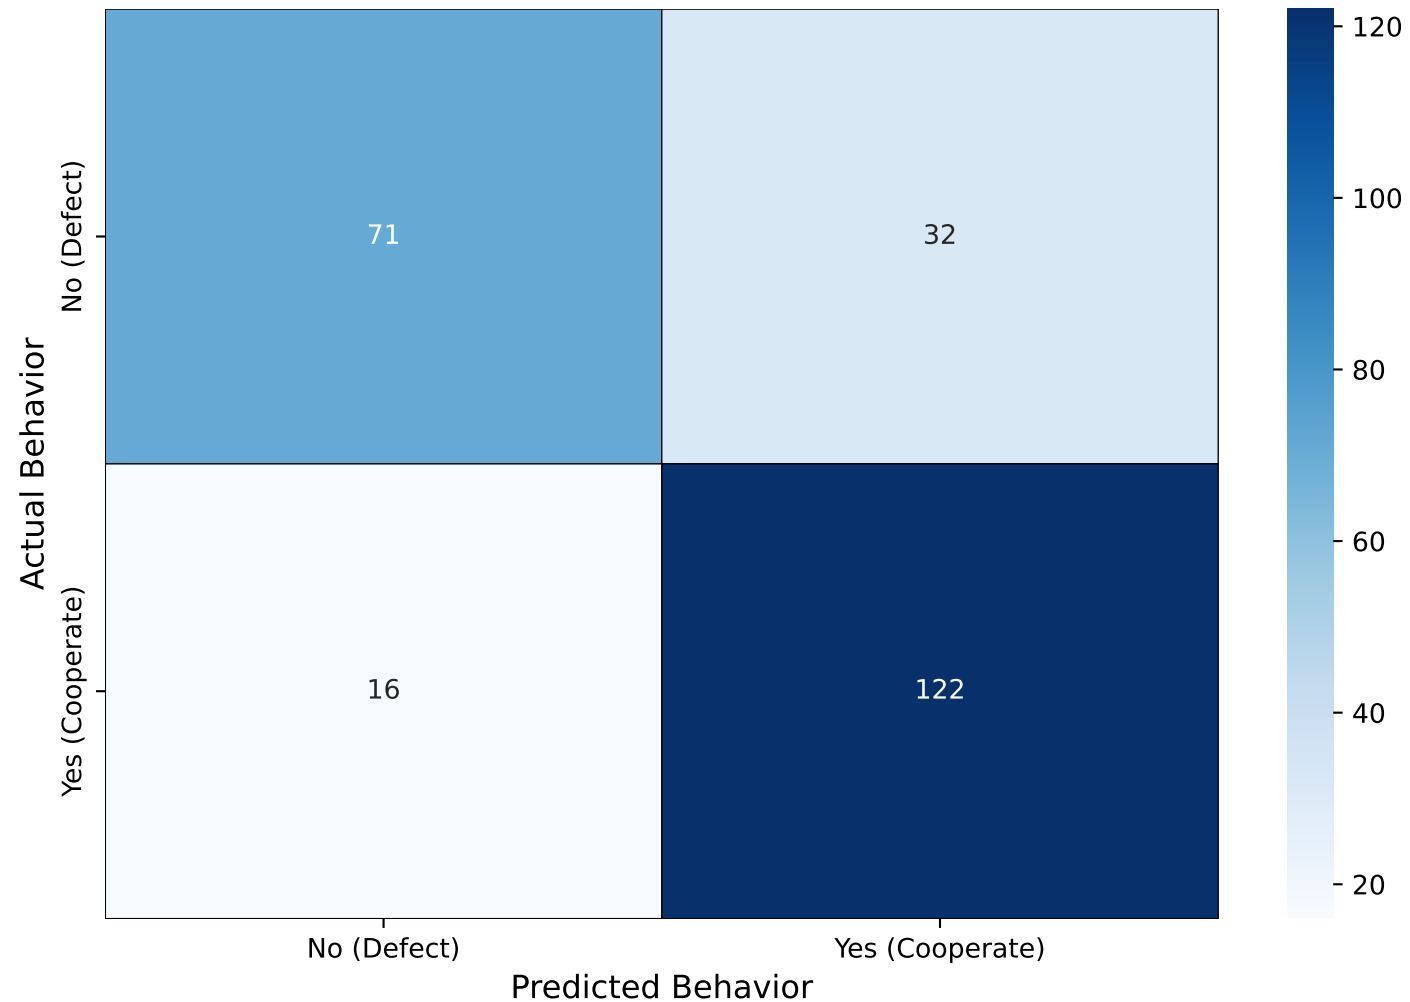

Supplement: supplementary_material [file GPT-4o_Mini_COT_unmasked_confusion.pdf › Supplementary Material/FindNICE Benchmark/visualizations/confusion_matrices/GPT-4o_Mini_COT_unmasked_confusion.pdf]

CM: GPT-4o Mini  
ZS Prompt, Masked Program

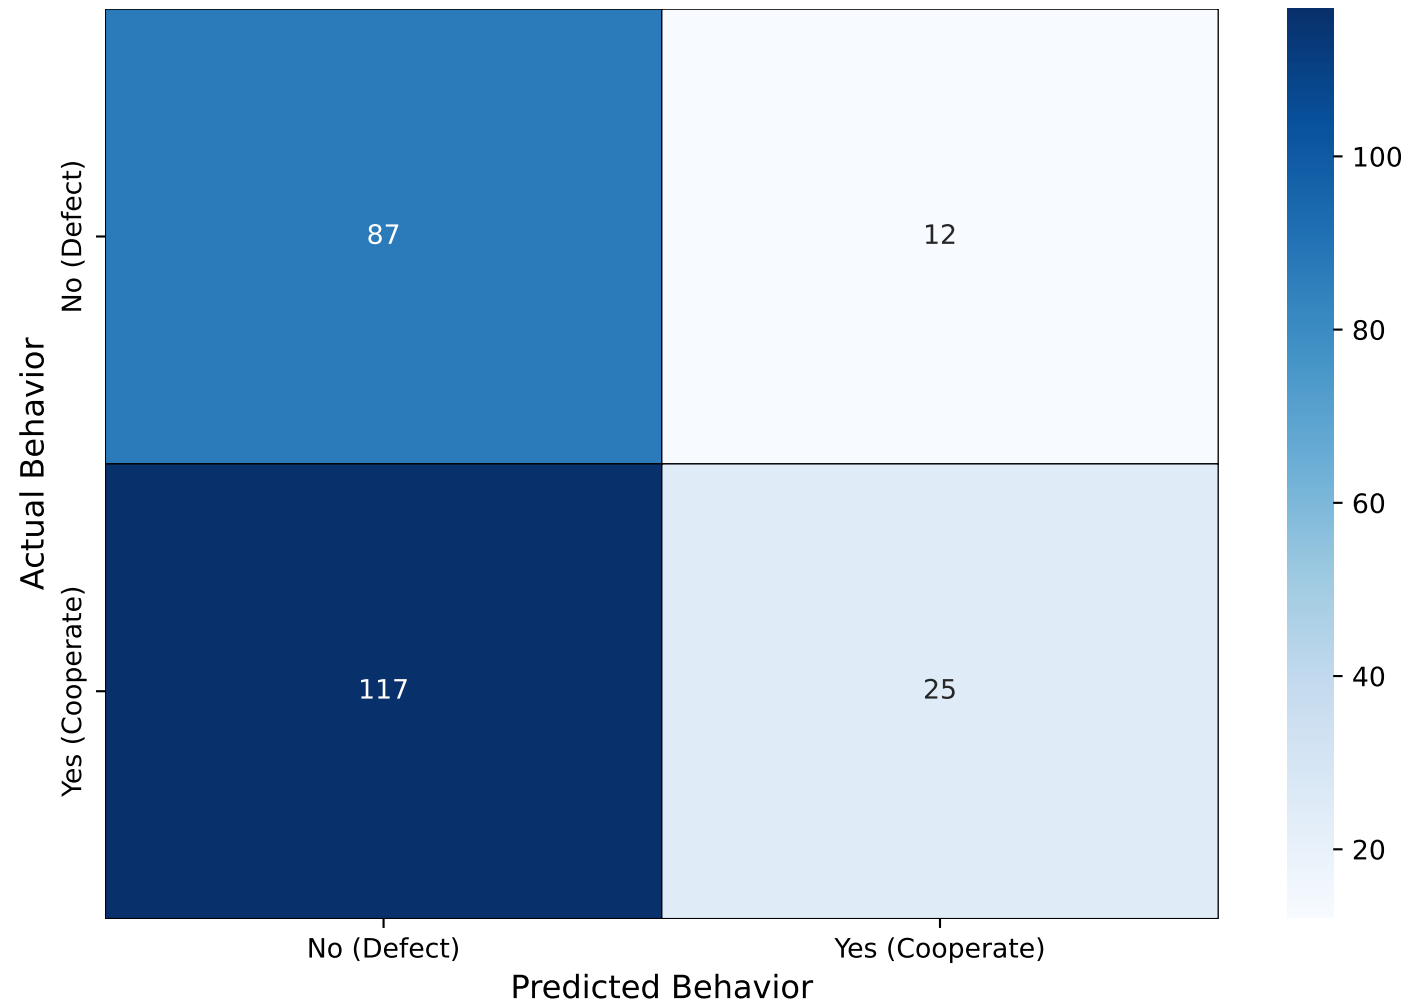

Supplement: supplementary_material [file GPT-4o_Mini_ZS_masked_confusion.pdf › Supplementary Material/FindNICE Benchmark/visualizations/confusion_matrices/GPT-4o_Mini_ZS_masked_confusion.pdf]

CM: GPT-4o Mini  
ZS Prompt, Obfuscated Program

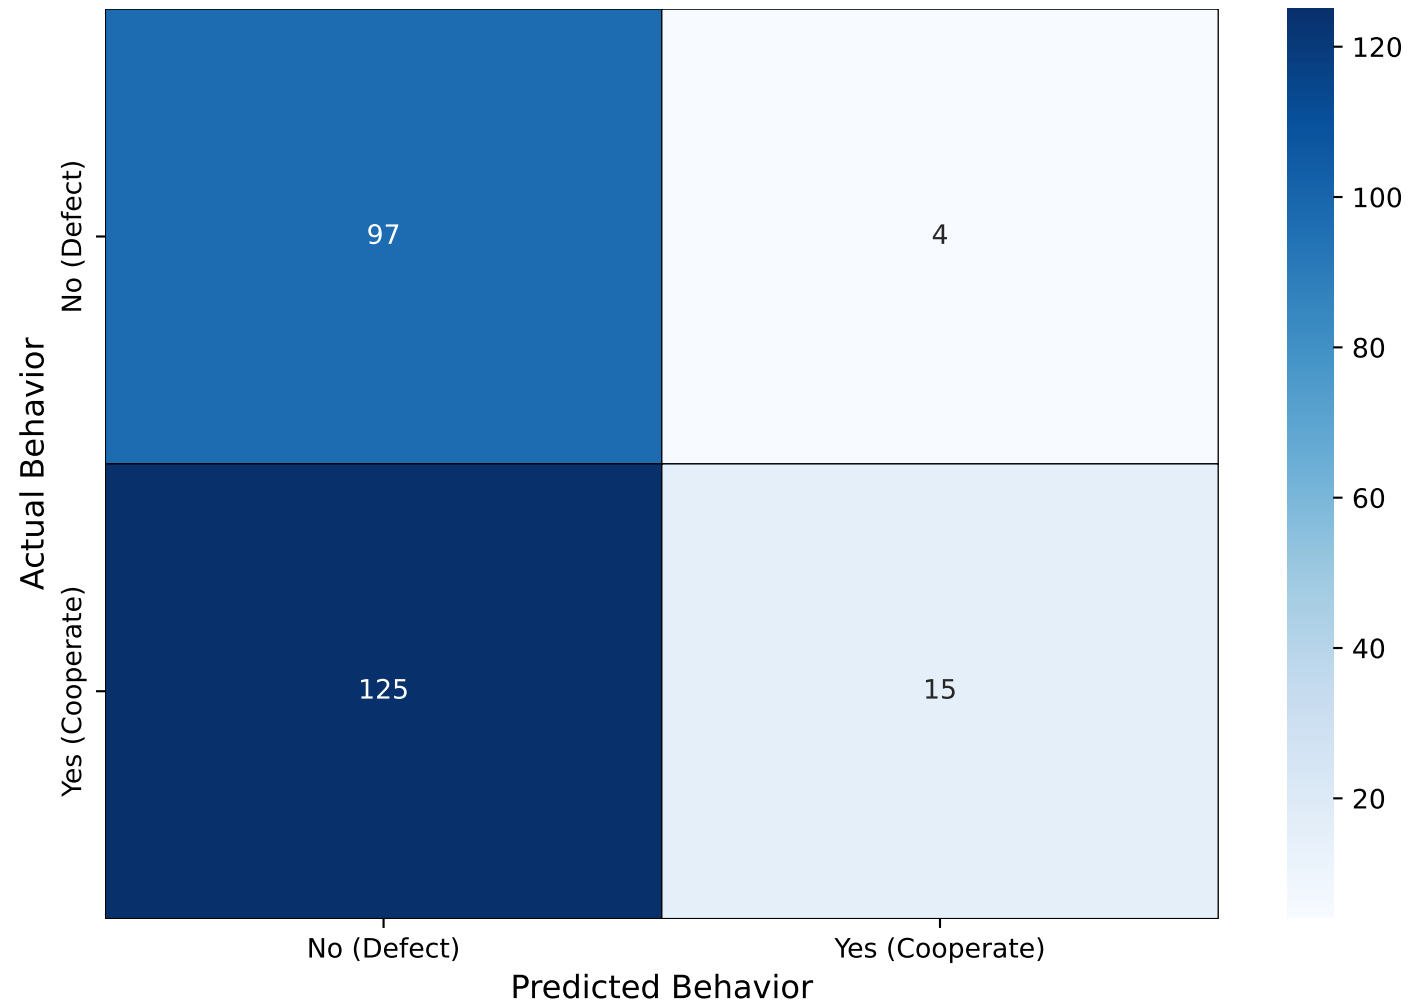

Supplement: supplementary_material [file GPT-4o_Mini_ZS_obfuscated_confusion.pdf › Supplementary Material/FindNICE Benchmark/visualizations/confusion_matrices/GPT-4o_Mini_ZS_obfuscated_confusion.pdf]

CM: GPT-4o Mini  
ZS Prompt, Unmasked Program

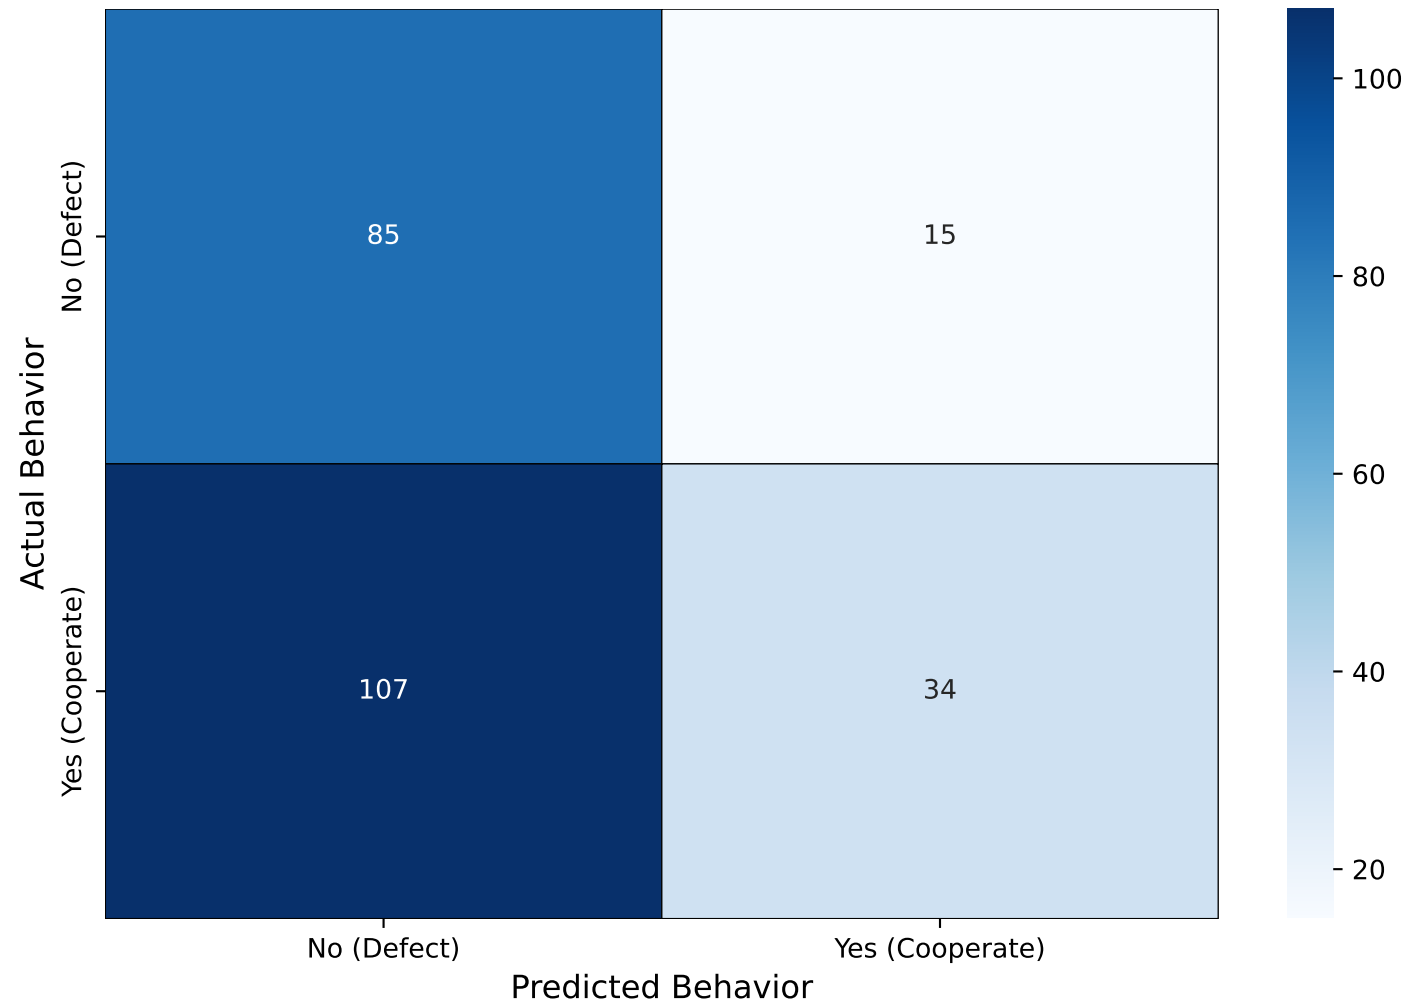

Supplement: supplementary_material [file GPT-4o_Mini_ZS_unmasked_confusion.pdf › Supplementary Material/FindNICE Benchmark/visualizations/confusion_matrices/GPT-4o_Mini_ZS_unmasked_confusion.pdf]

CM: Mistral Small (24B) (Instruct)  
COT Prompt, Masked Program

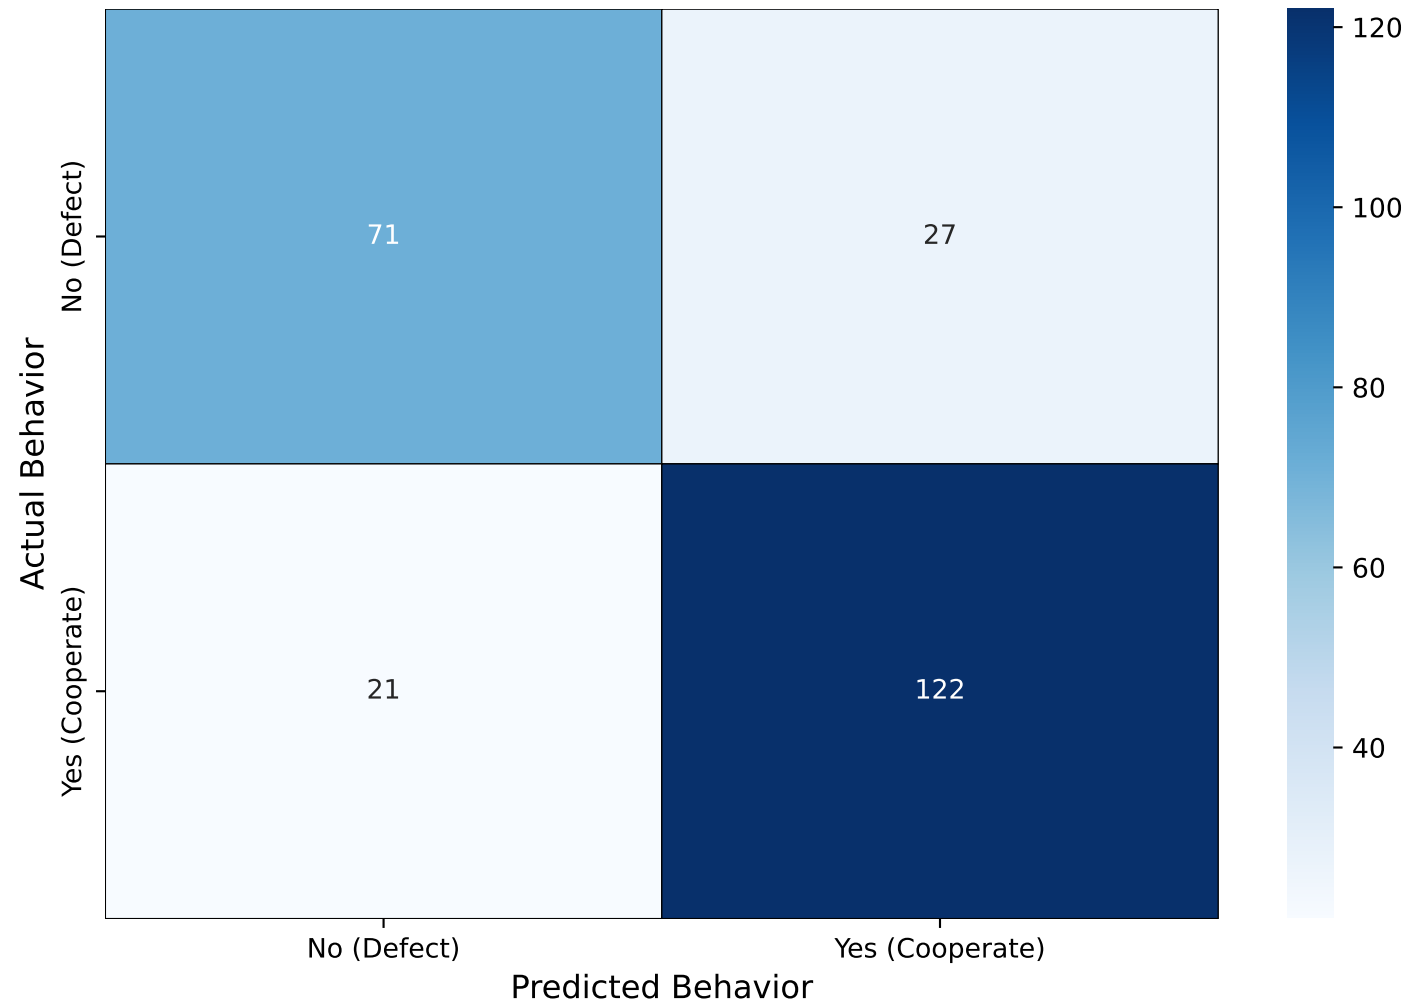

Supplement: supplementary_material [file Mistral_Small_(24B)_(Instruct)_COT_masked_confusion.pdf › Supplementary Material/FindNICE Benchmark/visualizations/confusion_matrices/Mistral_Small_(24B)_(Instruct)_COT_masked_confusion.pdf]

CM: Mistral Small (24B) (Instruct)  
COT Prompt, Obfuscated Program

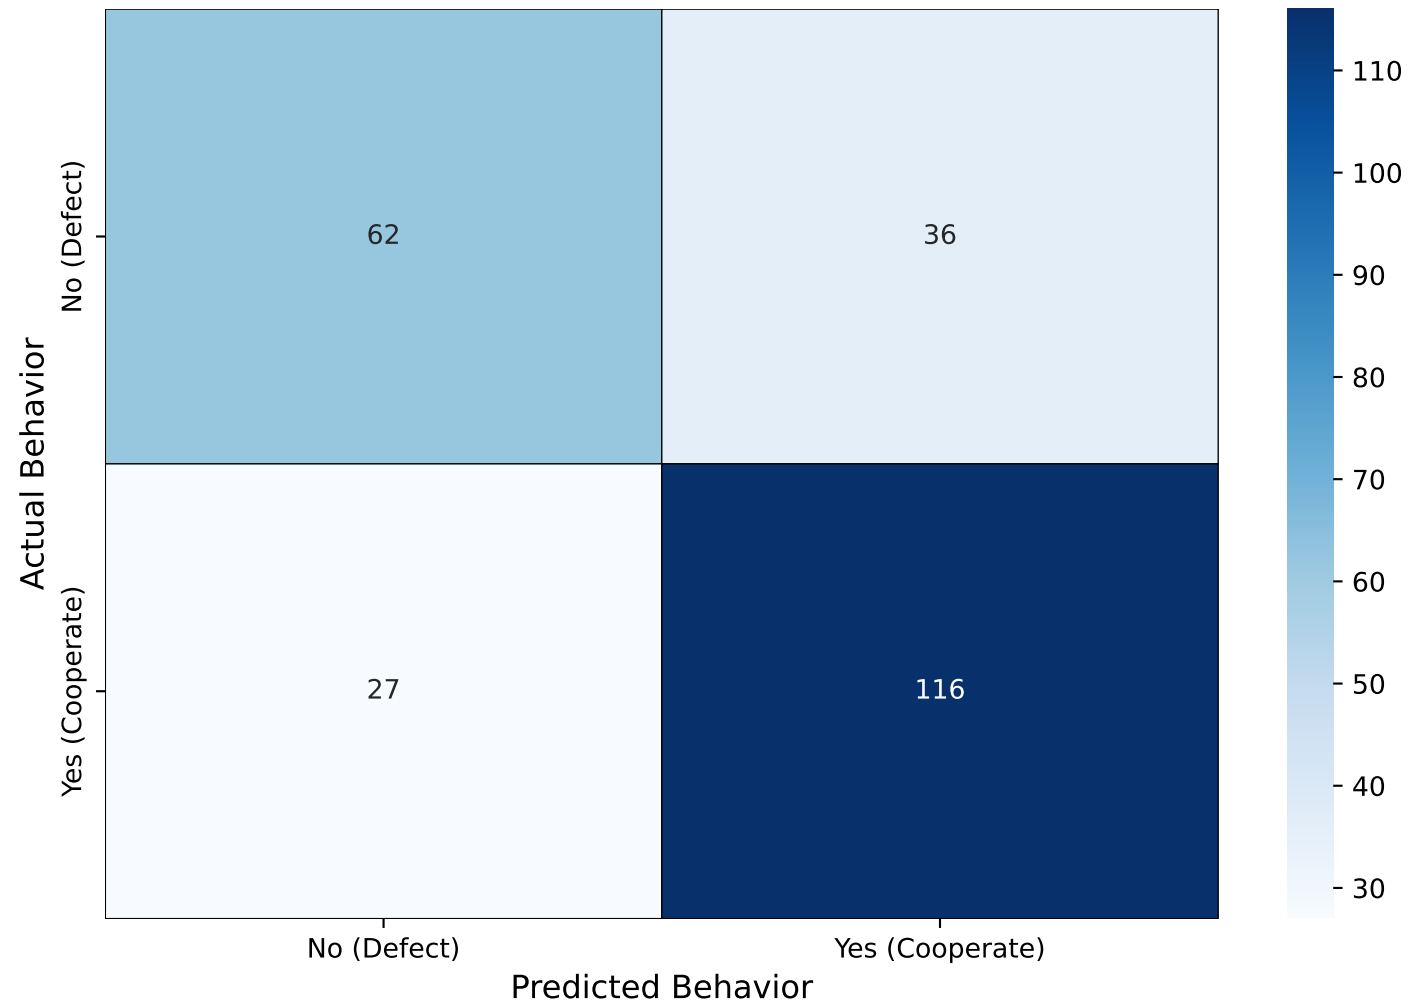

Supplement: supplementary_material [file Mistral_Small_(24B)_(Instruct)_COT_obfuscated_confusion.pdf › Supplementary Material/FindNICE Benchmark/visualizations/confusion_matrices/Mistral_Small_(24B)_(Instruct)_COT_obfuscated_confusion.pdf]

CM: Mistral Small (24B) (Instruct)  
COT Prompt, Unmasked Program

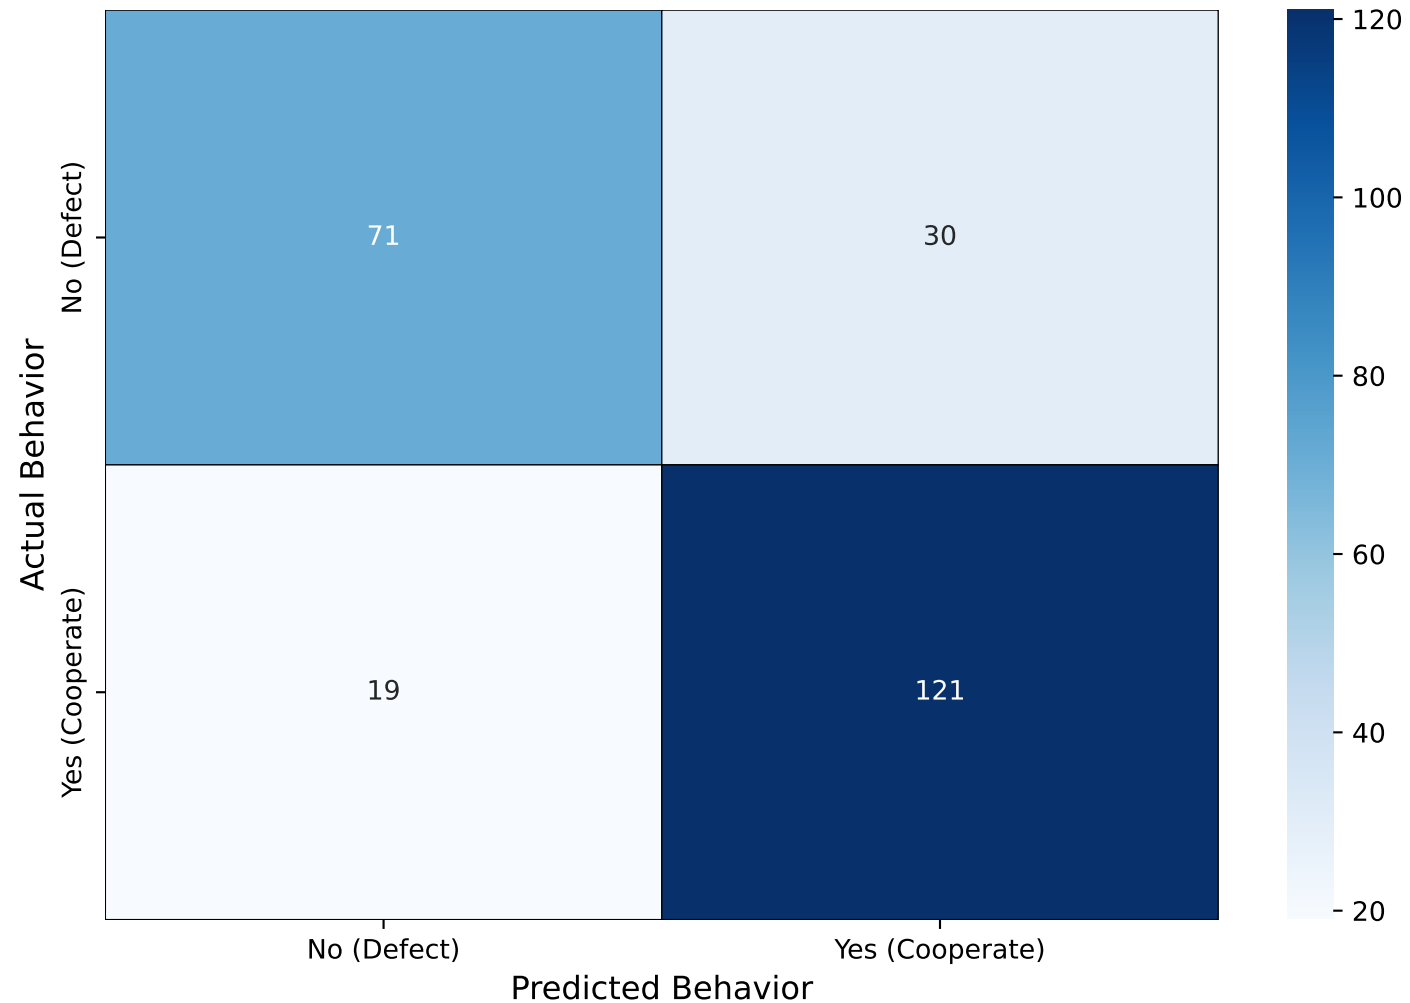

Supplement: supplementary_material [file Mistral_Small_(24B)_(Instruct)_COT_unmasked_confusion.pdf › Supplementary Material/FindNICE Benchmark/visualizations/confusion_matrices/Mistral_Small_(24B)_(Instruct)_COT_unmasked_confusion.pdf]

CM: Mistral Small (24B) (Instruct)  
ZS Prompt, Masked Program

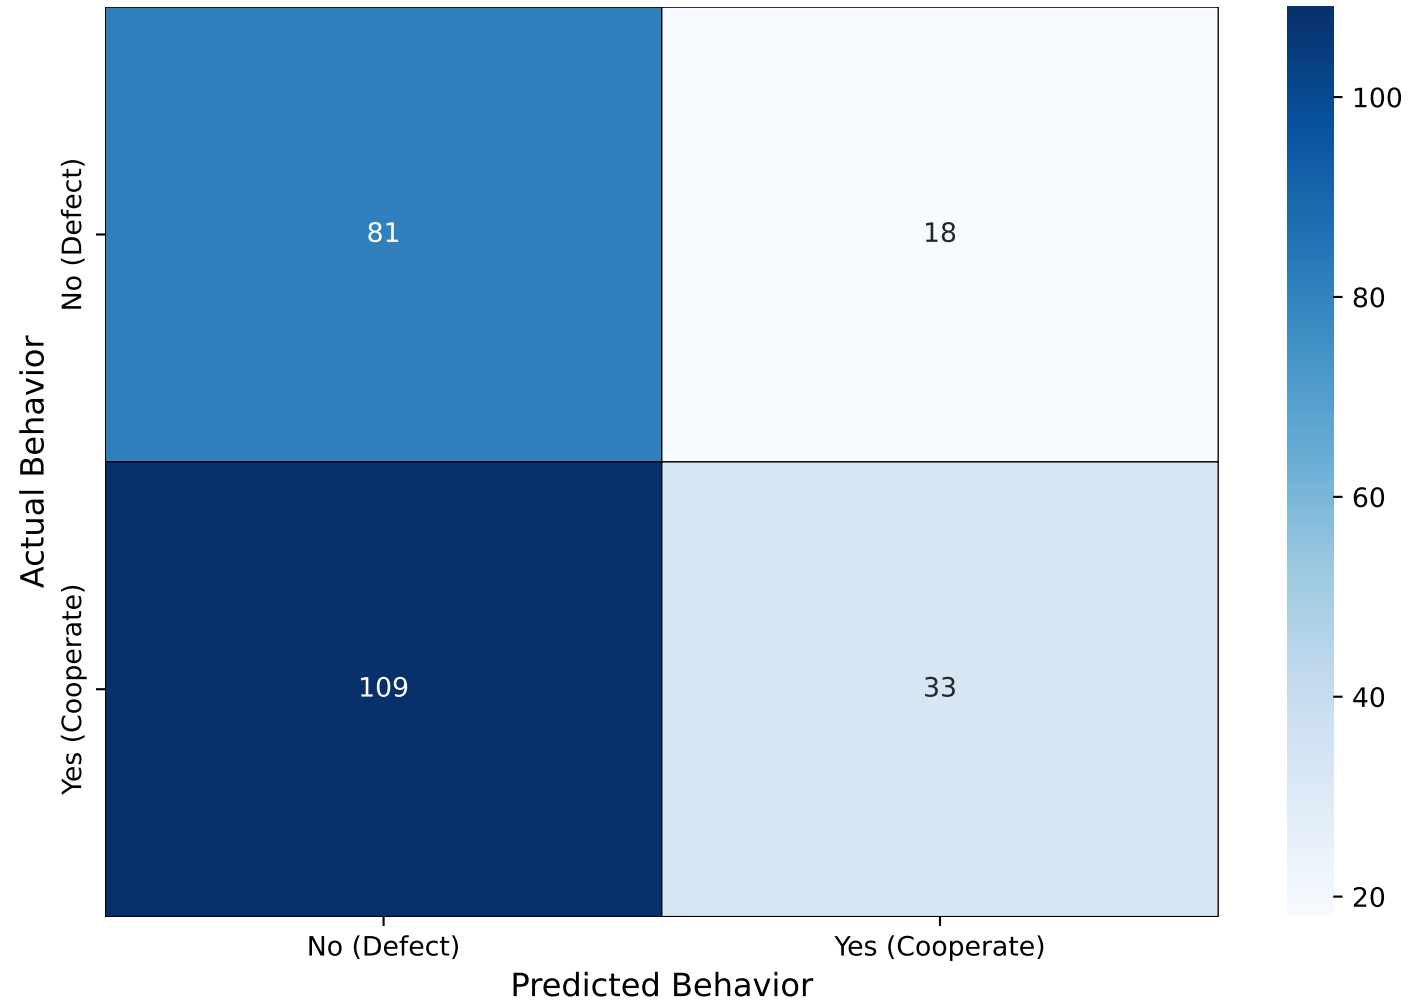

Supplement: supplementary_material [file Mistral_Small_(24B)_(Instruct)_ZS_masked_confusion.pdf › Supplementary Material/FindNICE Benchmark/visualizations/confusion_matrices/Mistral_Small_(24B)_(Instruct)_ZS_masked_confusion.pdf]

CM: Mistral Small (24B) (Instruct)  
ZS Prompt, Obfuscated Program

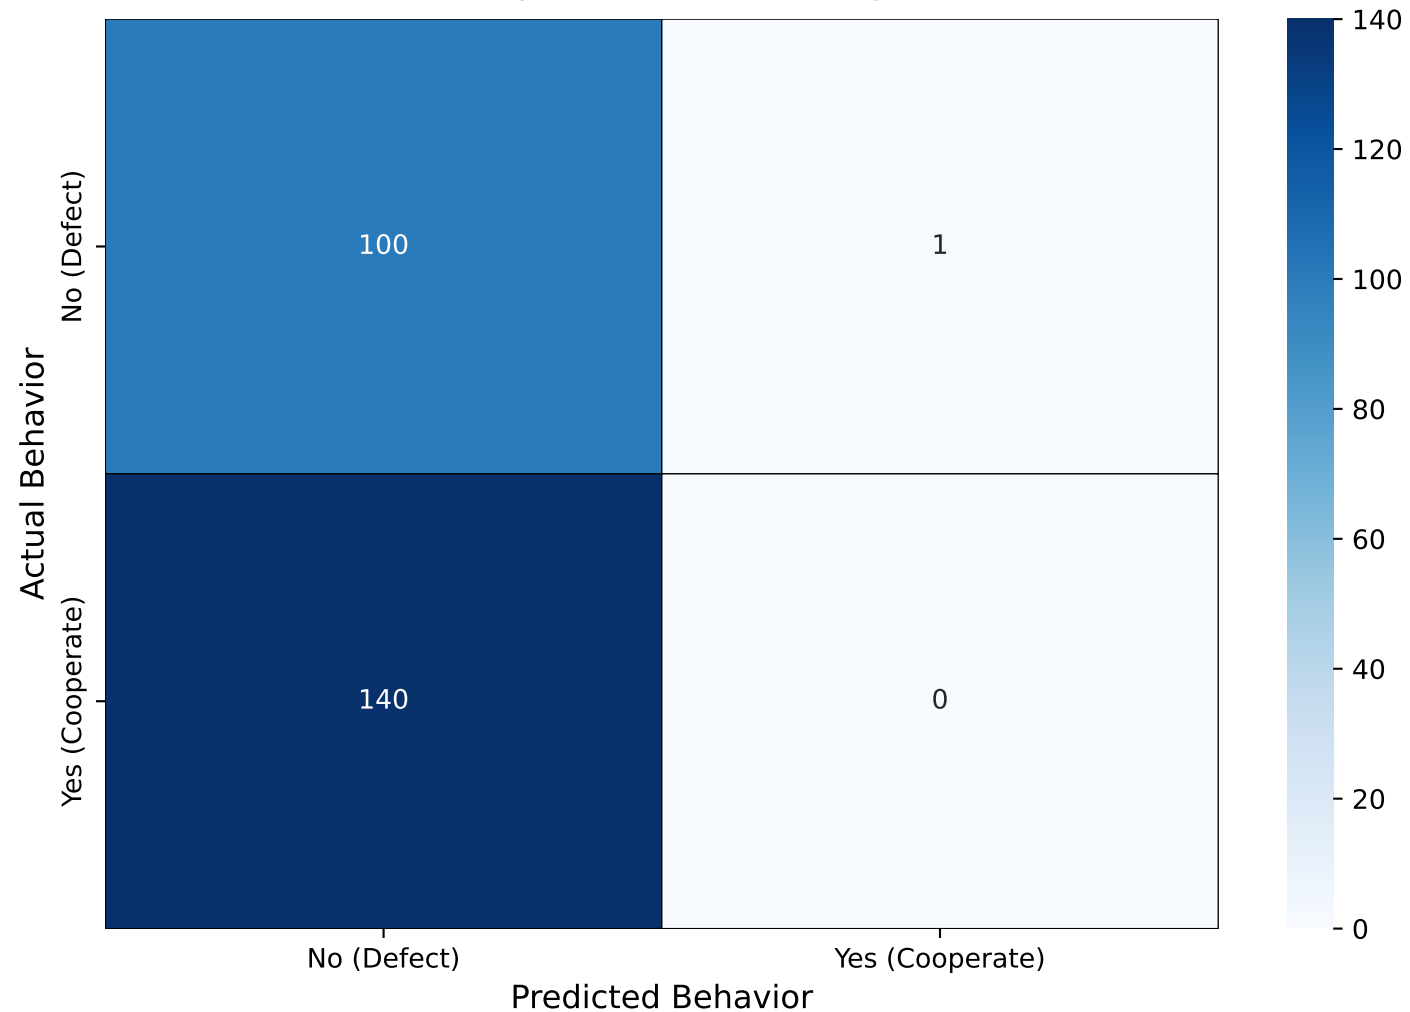

Supplement: supplementary_material [file Mistral_Small_(24B)_(Instruct)_ZS_obfuscated_confusion.pdf › Supplementary Material/FindNICE Benchmark/visualizations/confusion_matrices/Mistral_Small_(24B)_(Instruct)_ZS_obfuscated_confusion.pdf]

CM: Mistral Small (24B) (Instruct)  
ZS Prompt, Unmasked Program

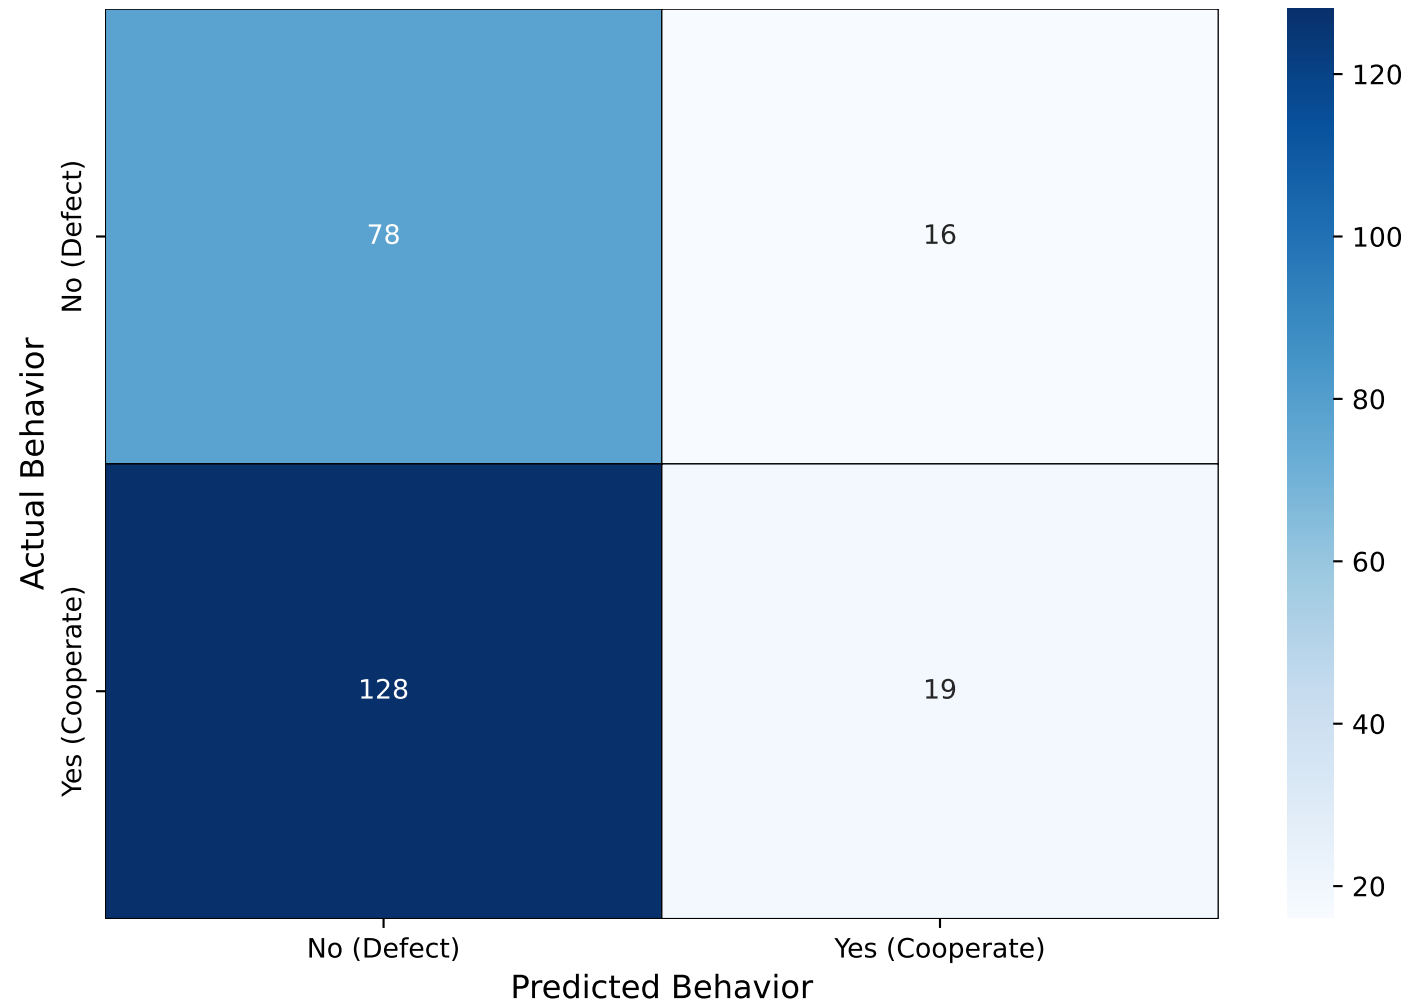

Supplement: supplementary_material [file Mistral_Small_(24B)_(Instruct)_ZS_unmasked_confusion.pdf › Supplementary Material/FindNICE Benchmark/visualizations/confusion_matrices/Mistral_Small_(24B)_(Instruct)_ZS_unmasked_confusion.pdf]

CM: Qwen 2.5 (72B) (Instruct)  
COT Prompt, Masked Program

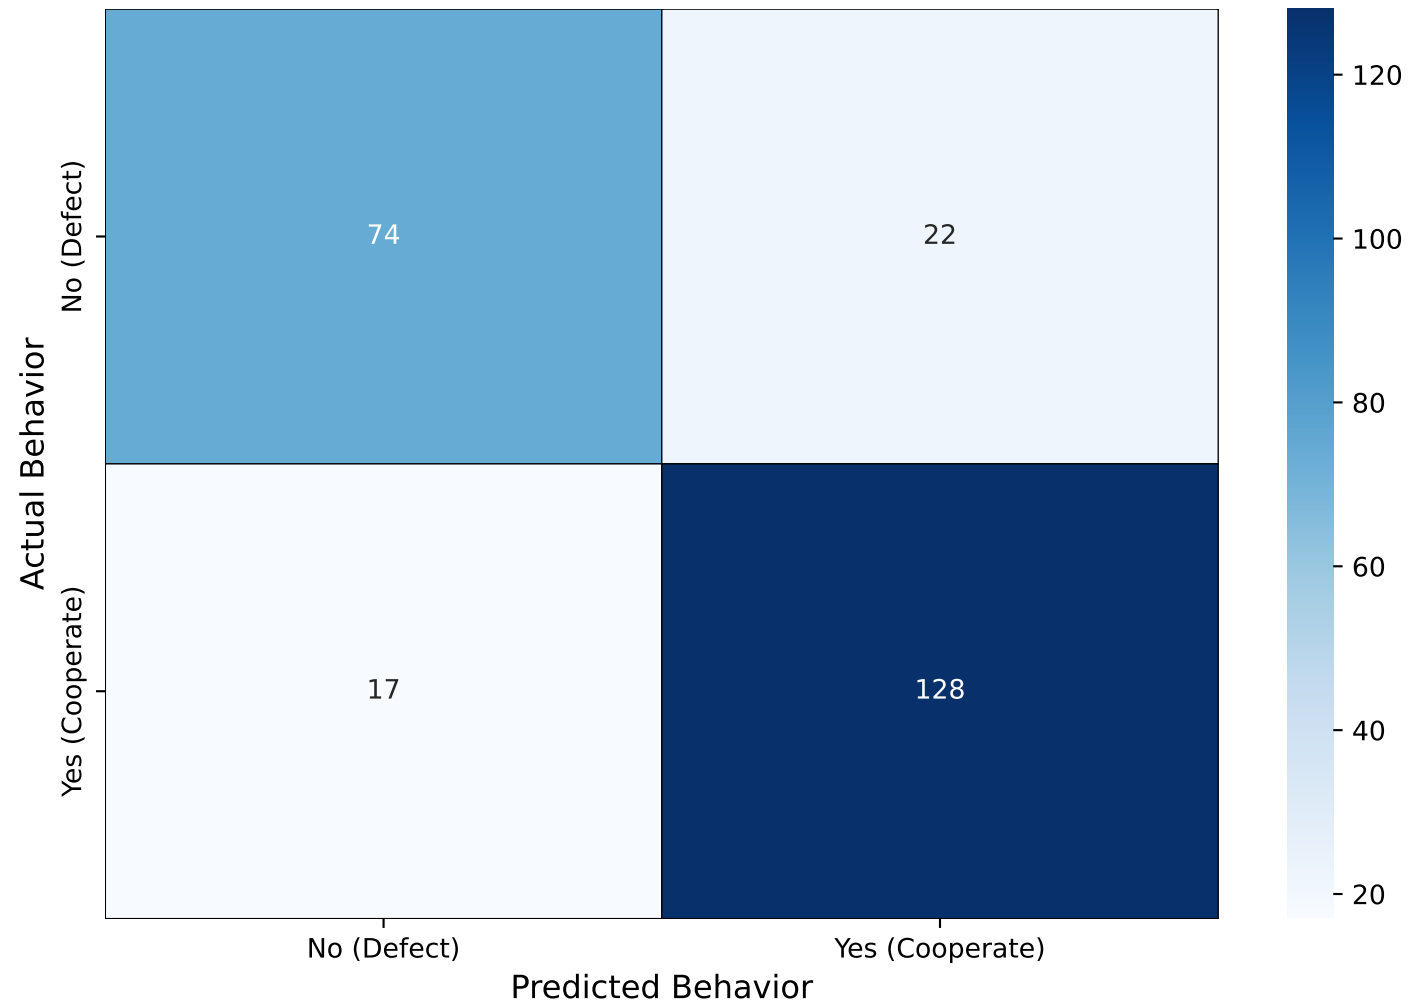

Supplement: supplementary_material [file Qwen_2.5_(72B)_(Instruct)_COT_masked_confusion.pdf › Supplementary Material/FindNICE Benchmark/visualizations/confusion_matrices/Qwen_2.5_(72B)_(Instruct)_COT_masked_confusion.pdf]

CM: Qwen 2.5 (72B) (Instruct)  
COT Prompt, Obfuscated Program

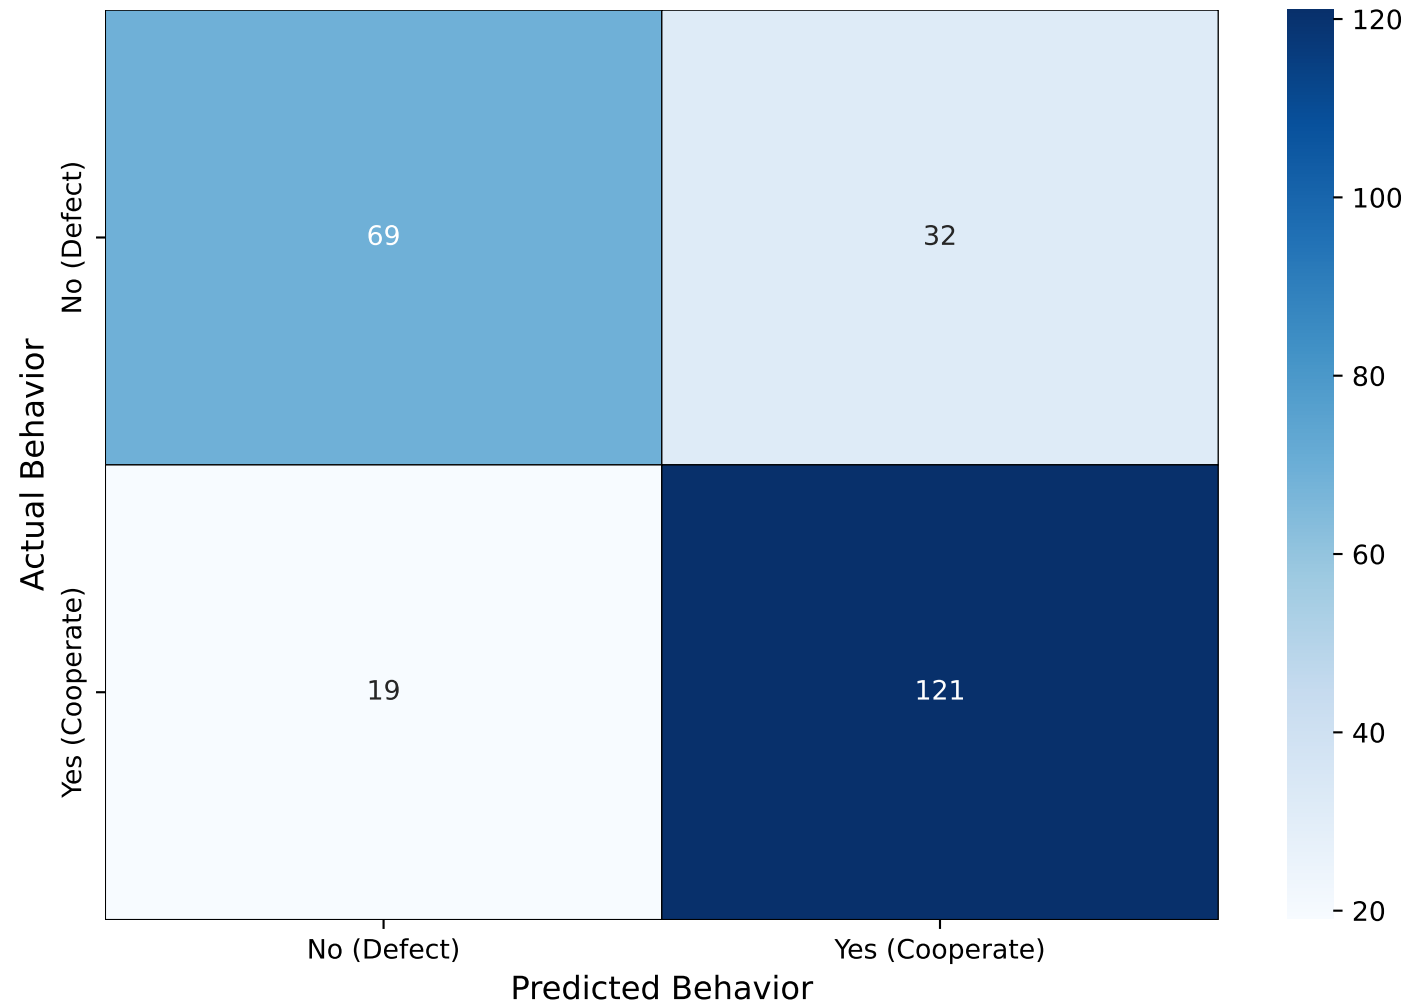

Supplement: supplementary_material [file Qwen_2.5_(72B)_(Instruct)_COT_obfuscated_confusion.pdf › Supplementary Material/FindNICE Benchmark/visualizations/confusion_matrices/Qwen_2.5_(72B)_(Instruct)_COT_obfuscated_confusion.pdf]

CM: Qwen 2.5 (72B) (Instruct)  
COT Prompt, Unmasked Program

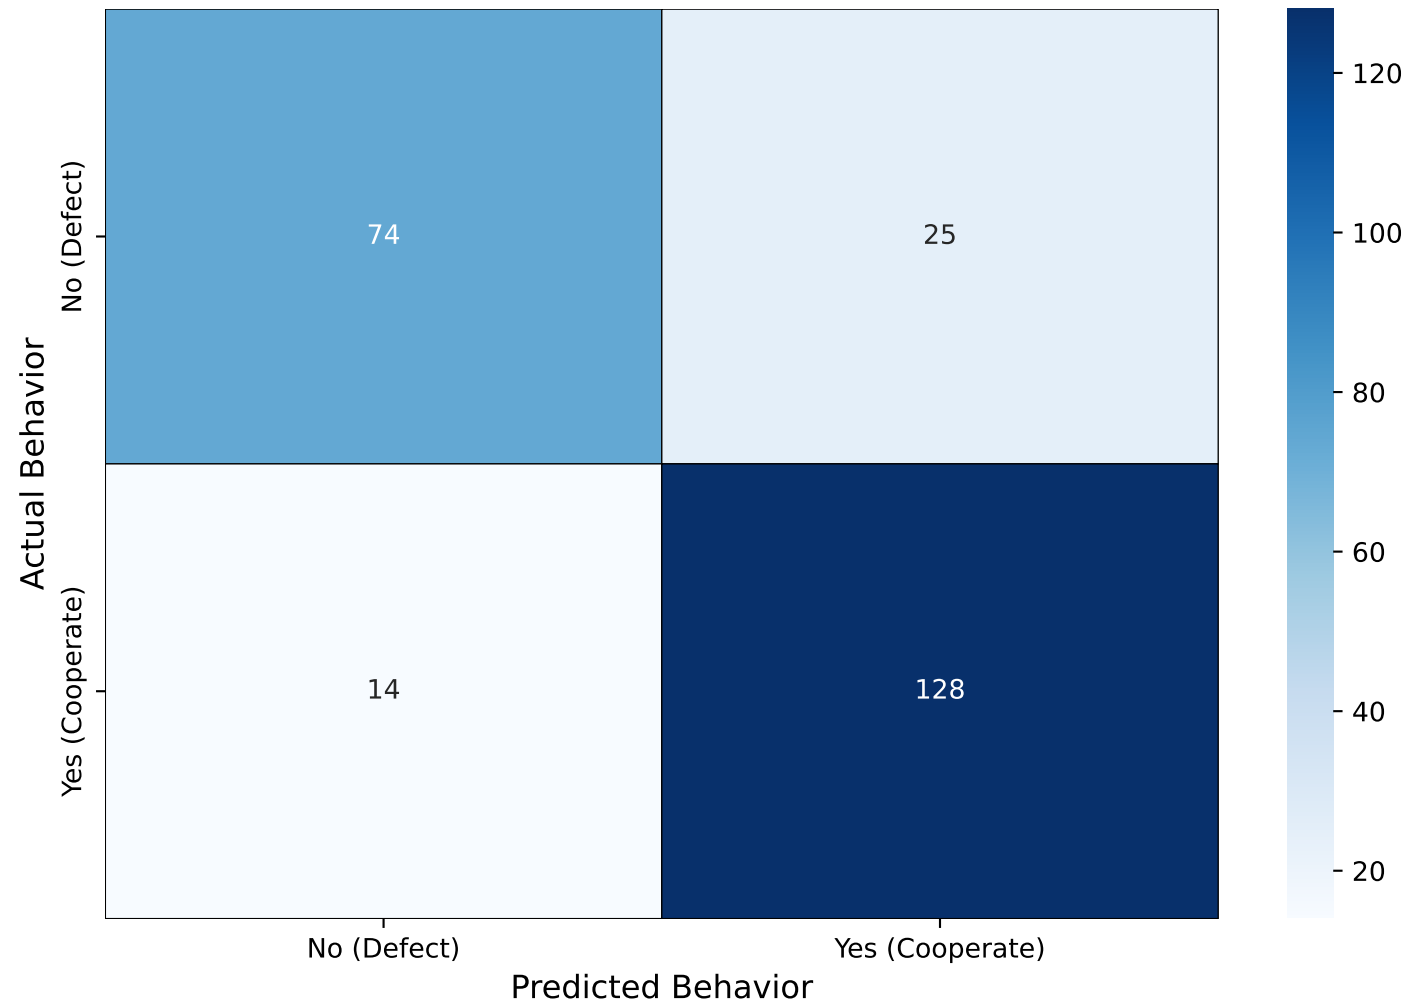

Supplement: supplementary_material [file Qwen_2.5_(72B)_(Instruct)_COT_unmasked_confusion.pdf › Supplementary Material/FindNICE Benchmark/visualizations/confusion_matrices/Qwen_2.5_(72B)_(Instruct)_COT_unmasked_confusion.pdf]

CM: Qwen 2.5 (72B) (Instruct)  
ZS Prompt, Masked Program

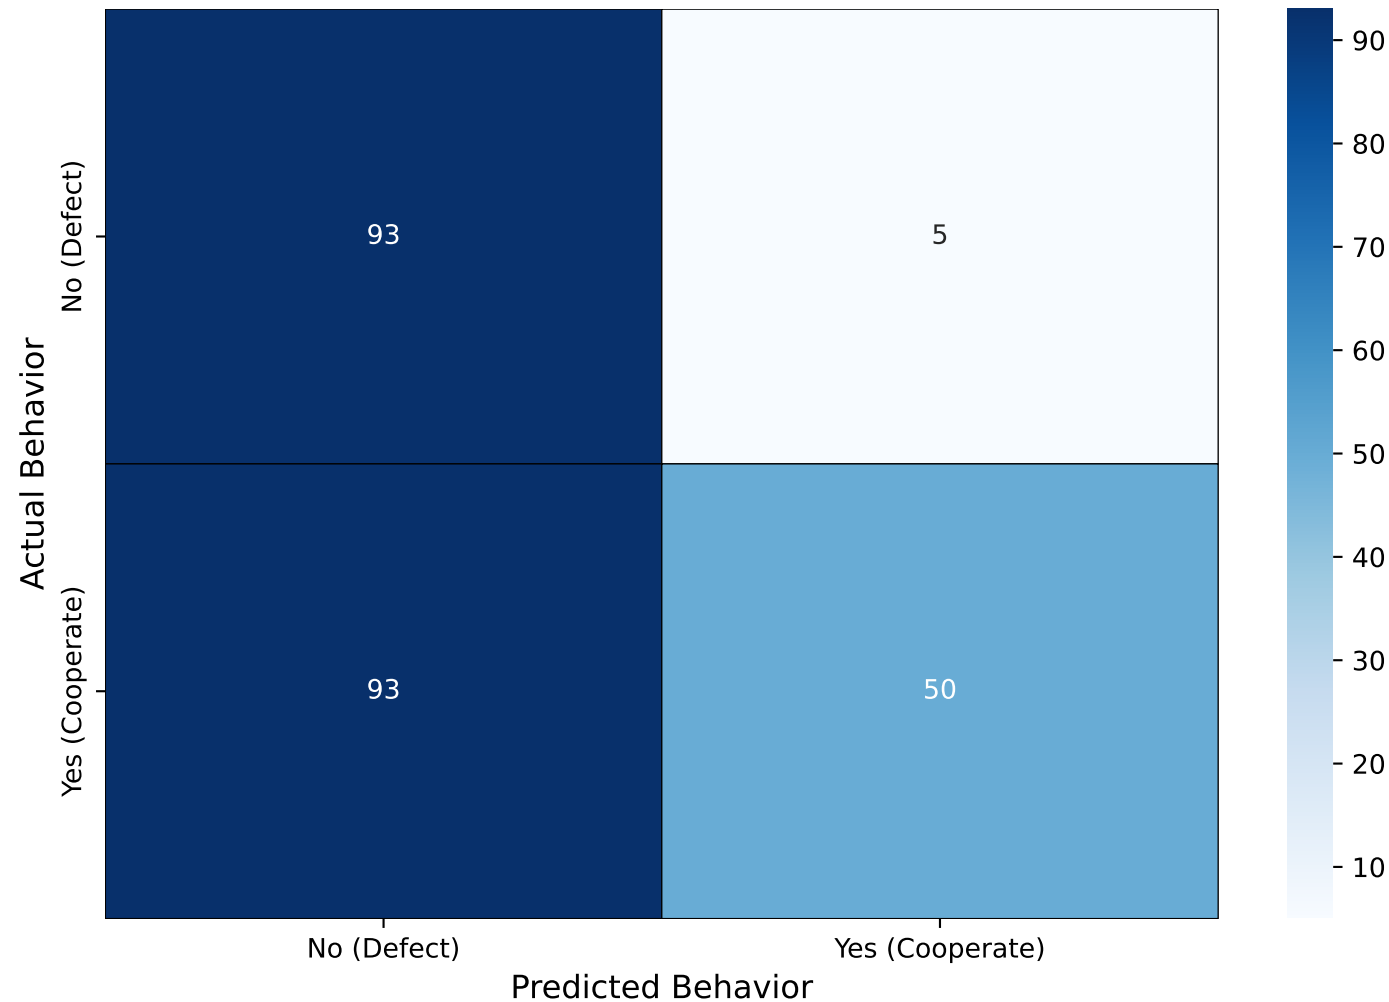

Supplement: supplementary_material [file Qwen_2.5_(72B)_(Instruct)_ZS_masked_confusion.pdf › Supplementary Material/FindNICE Benchmark/visualizations/confusion_matrices/Qwen_2.5_(72B)_(Instruct)_ZS_masked_confusion.pdf]

CM: Qwen 2.5 (72B) (Instruct)  
ZS Prompt, Obfuscated Program

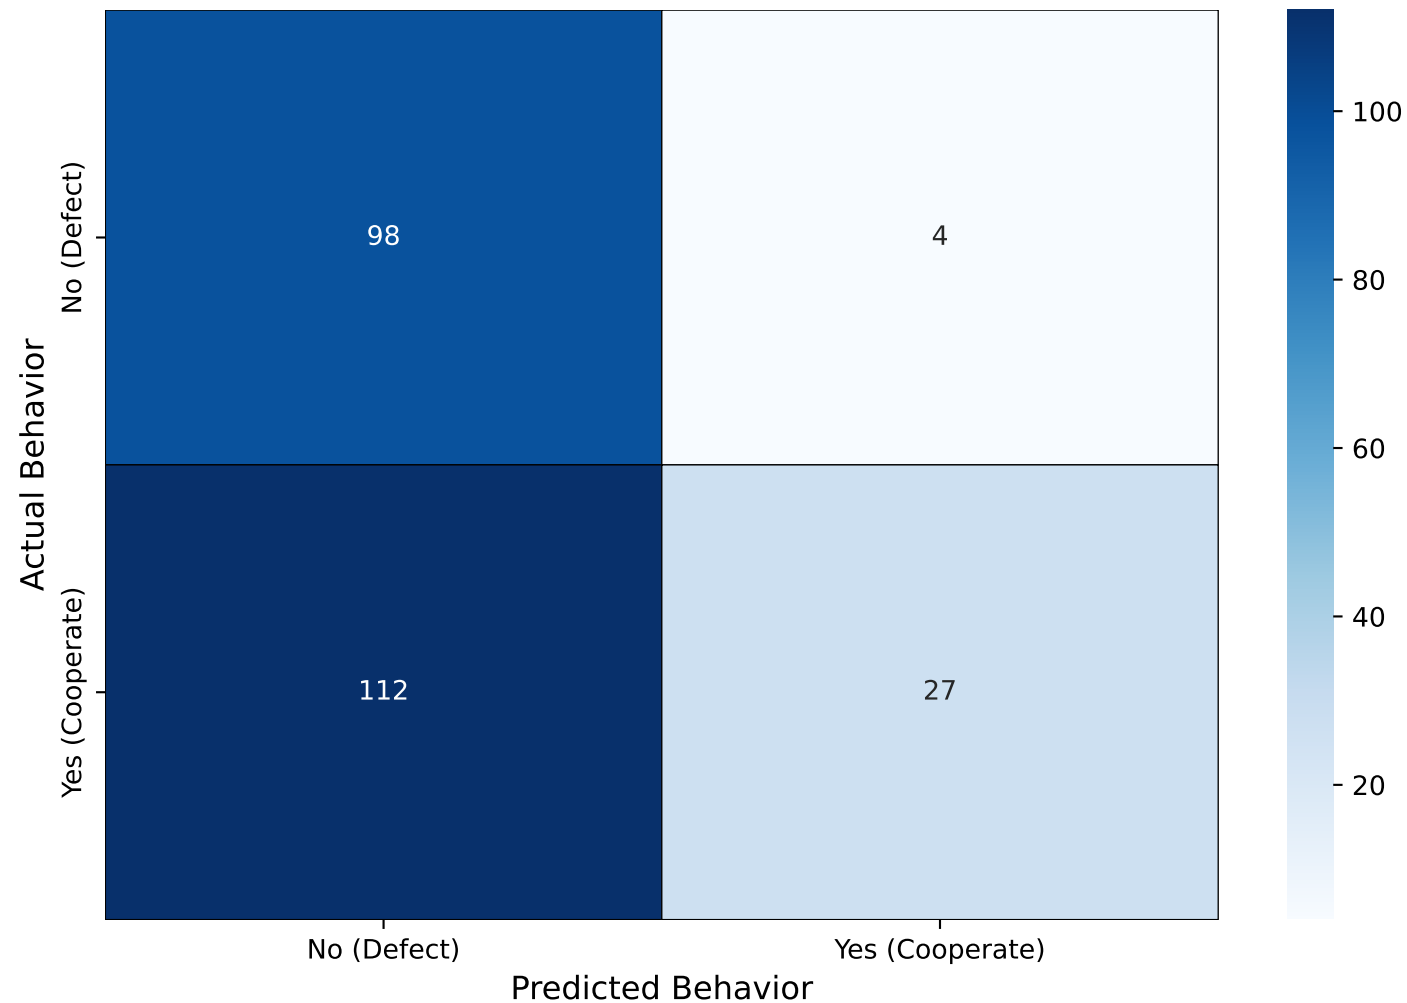

Supplement: supplementary_material [file Qwen_2.5_(72B)_(Instruct)_ZS_obfuscated_confusion.pdf › Supplementary Material/FindNICE Benchmark/visualizations/confusion_matrices/Qwen_2.5_(72B)_(Instruct)_ZS_obfuscated_confusion.pdf]

CM: Qwen 2.5 (72B) (Instruct)  
ZS Prompt, Unmasked Program

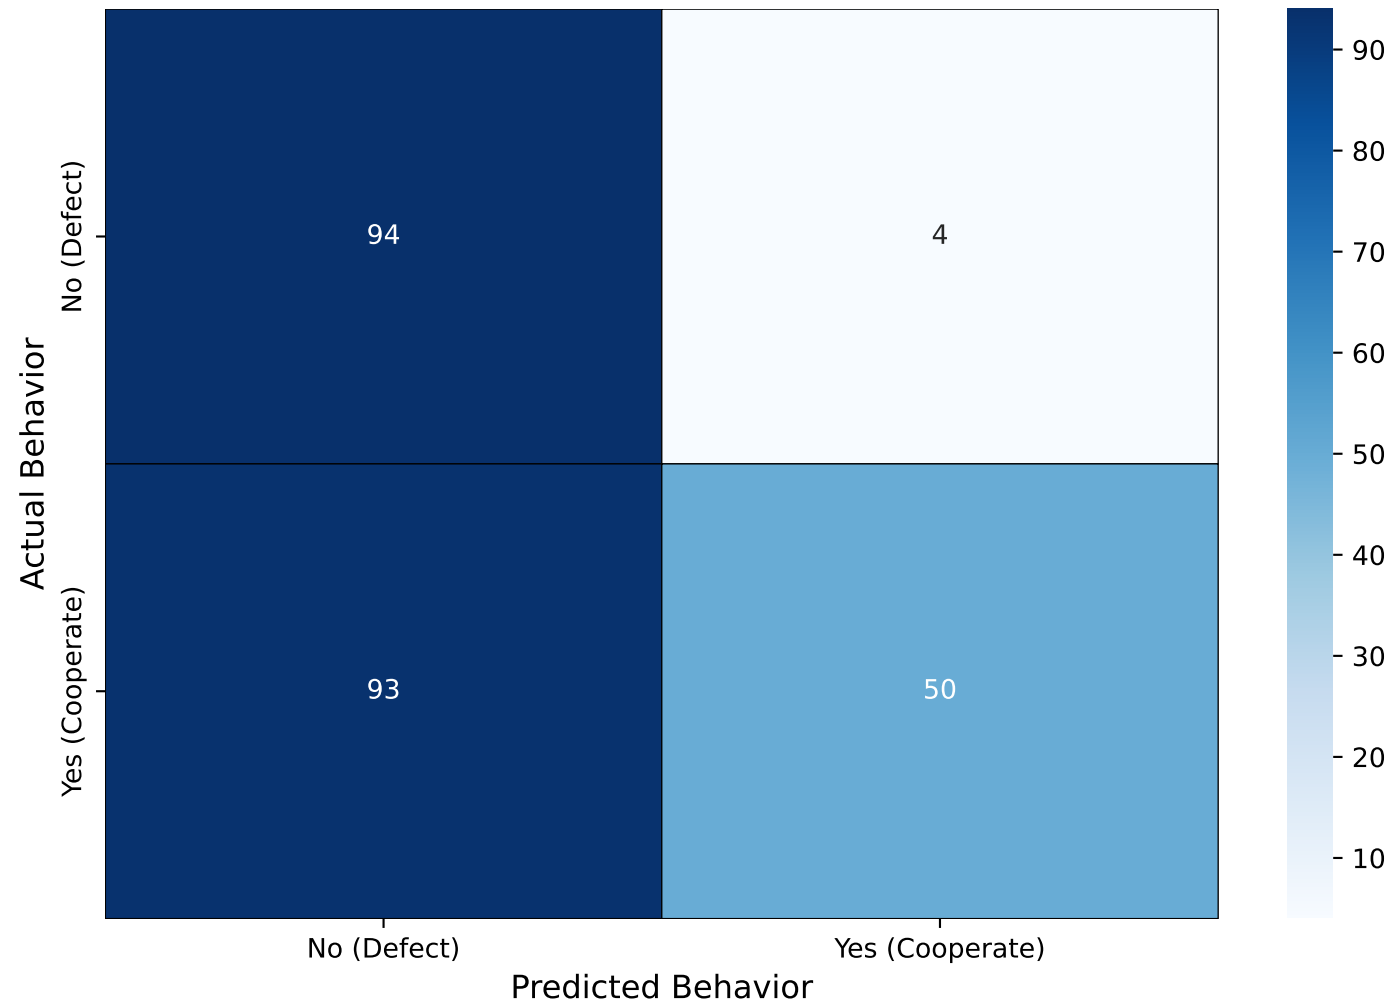

Supplement: supplementary_material [file Qwen_2.5_(72B)_(Instruct)_ZS_unmasked_confusion.pdf › Supplementary Material/FindNICE Benchmark/visualizations/confusion_matrices/Qwen_2.5_(72B)_(Instruct)_ZS_unmasked_confusion.pdf]

CM: Qwen 2.5 (7B) (Instruct)  
COT Prompt, Masked Program

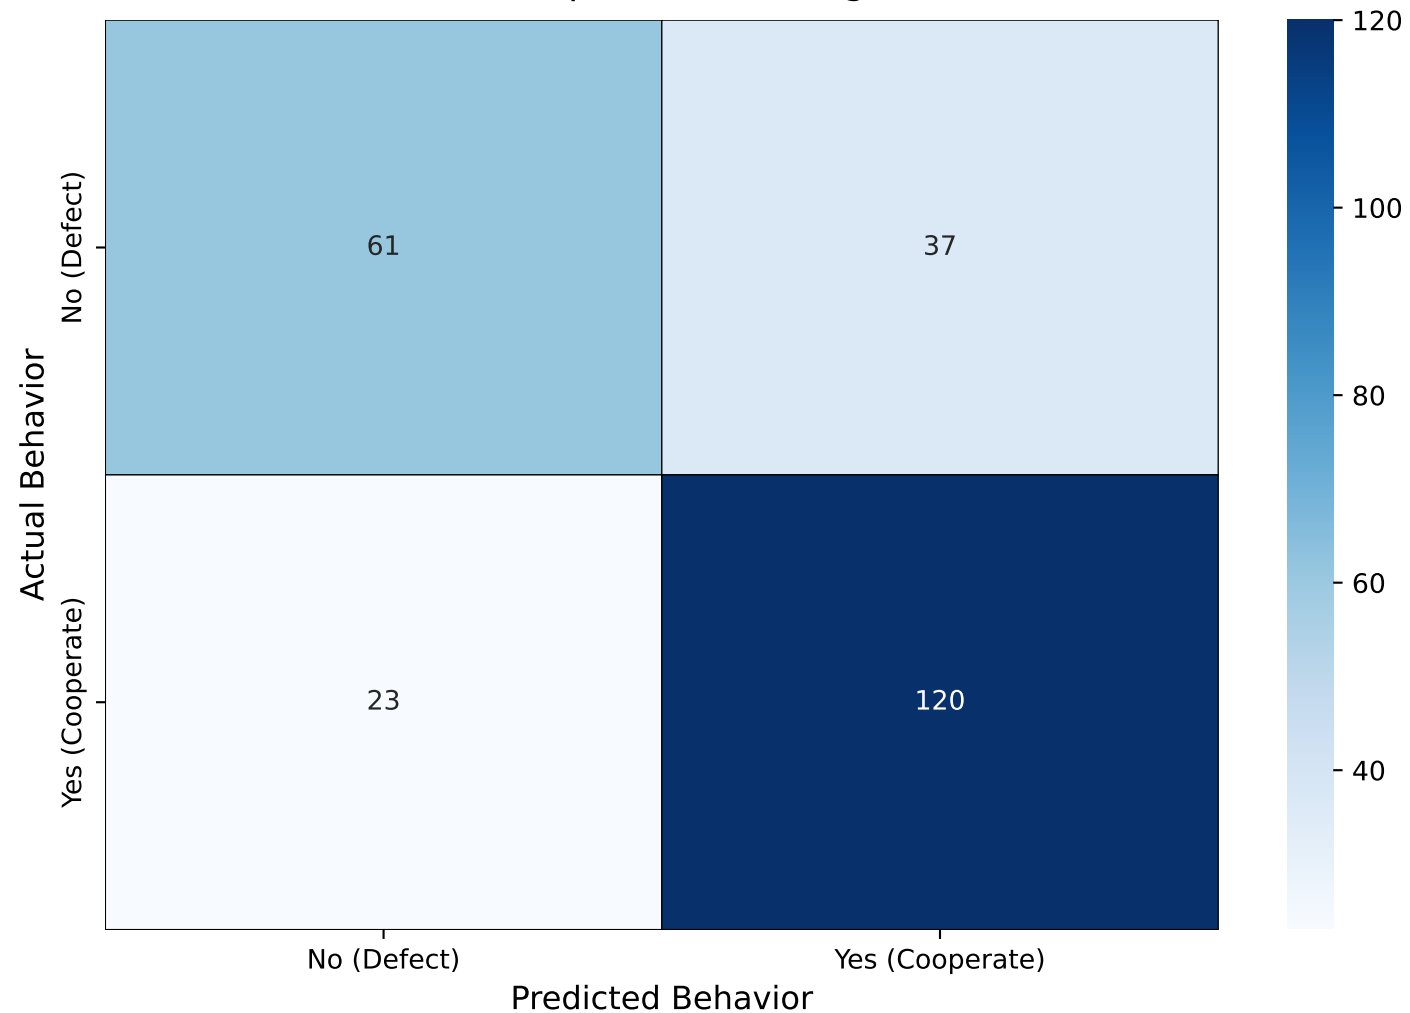

Supplement: supplementary_material [file Qwen_2.5_(7B)_(Instruct)_COT_masked_confusion.pdf › Supplementary Material/FindNICE Benchmark/visualizations/confusion_matrices/Qwen_2.5_(7B)_(Instruct)_COT_masked_confusion.pdf]

CM: Qwen 2.5 (7B) (Instruct)  
COT Prompt, Obfuscated Program

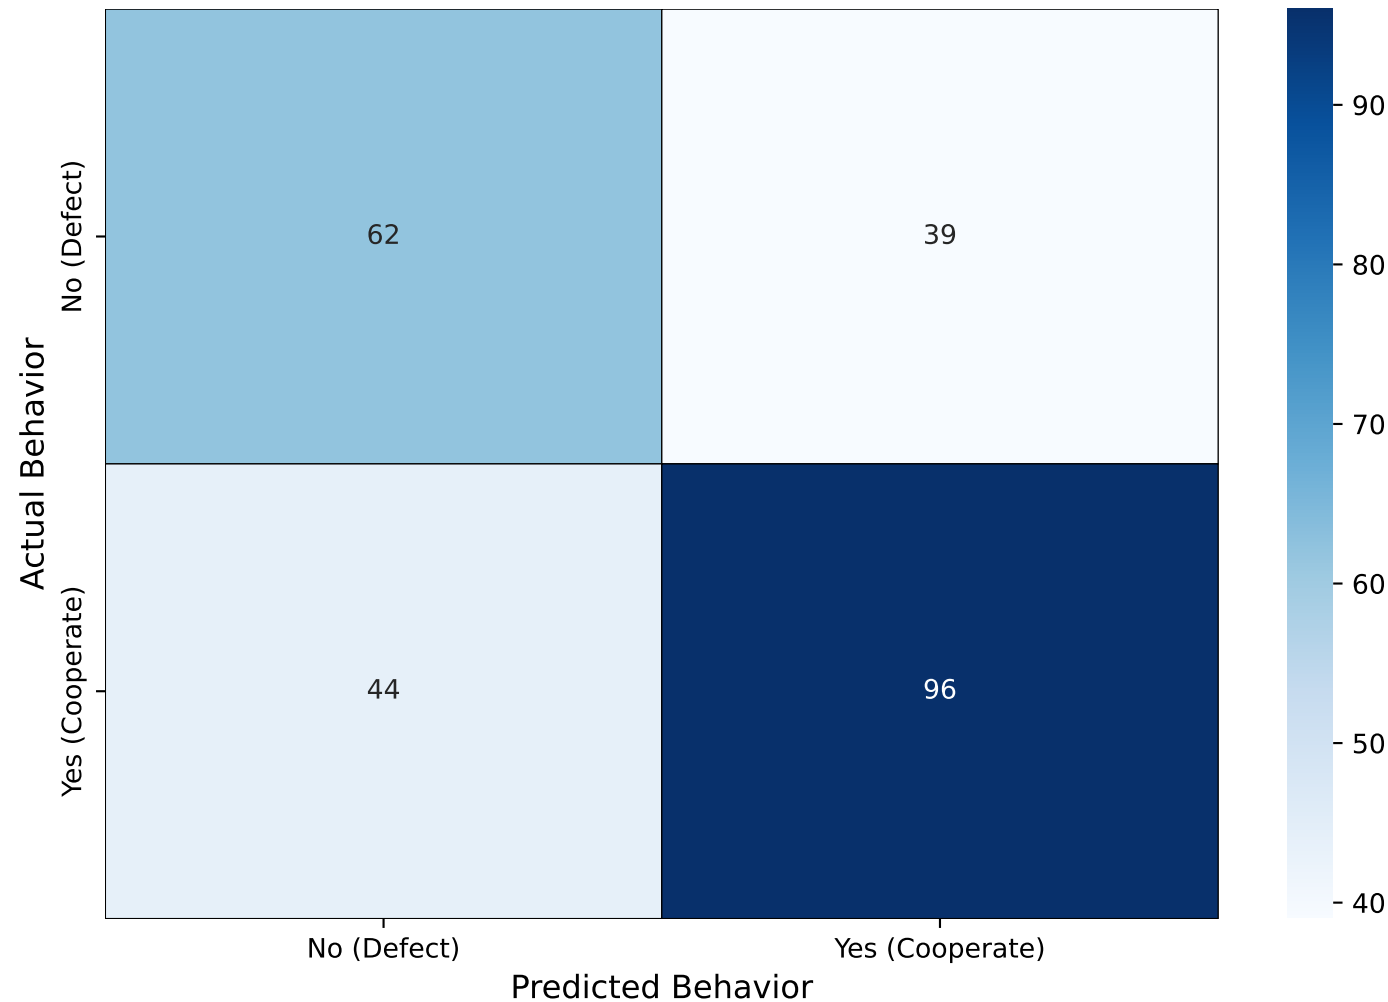

Supplement: supplementary_material [file Qwen_2.5_(7B)_(Instruct)_COT_obfuscated_confusion.pdf › Supplementary Material/FindNICE Benchmark/visualizations/confusion_matrices/Qwen_2.5_(7B)_(Instruct)_COT_obfuscated_confusion.pdf]

CM: Qwen 2.5 (7B) (Instruct)  
COT Prompt, Unmasked Program

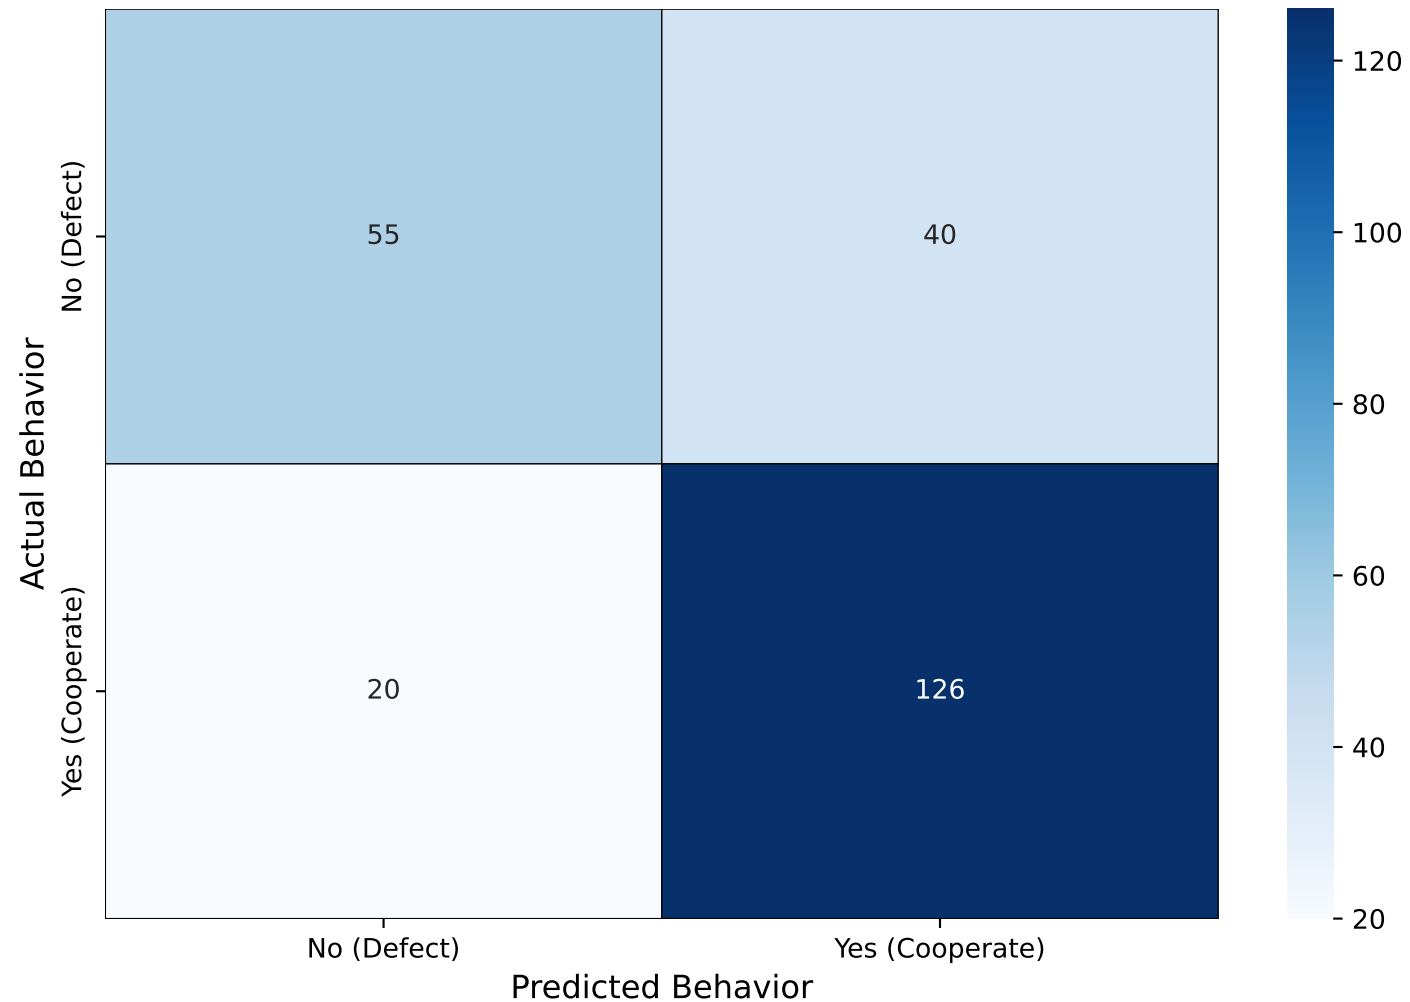

Supplement: supplementary_material [file Qwen_2.5_(7B)_(Instruct)_COT_unmasked_confusion.pdf › Supplementary Material/FindNICE Benchmark/visualizations/confusion_matrices/Qwen_2.5_(7B)_(Instruct)_COT_unmasked_confusion.pdf]

CM: Qwen 2.5 (7B) (Instruct)  
ZS Prompt, Masked Program

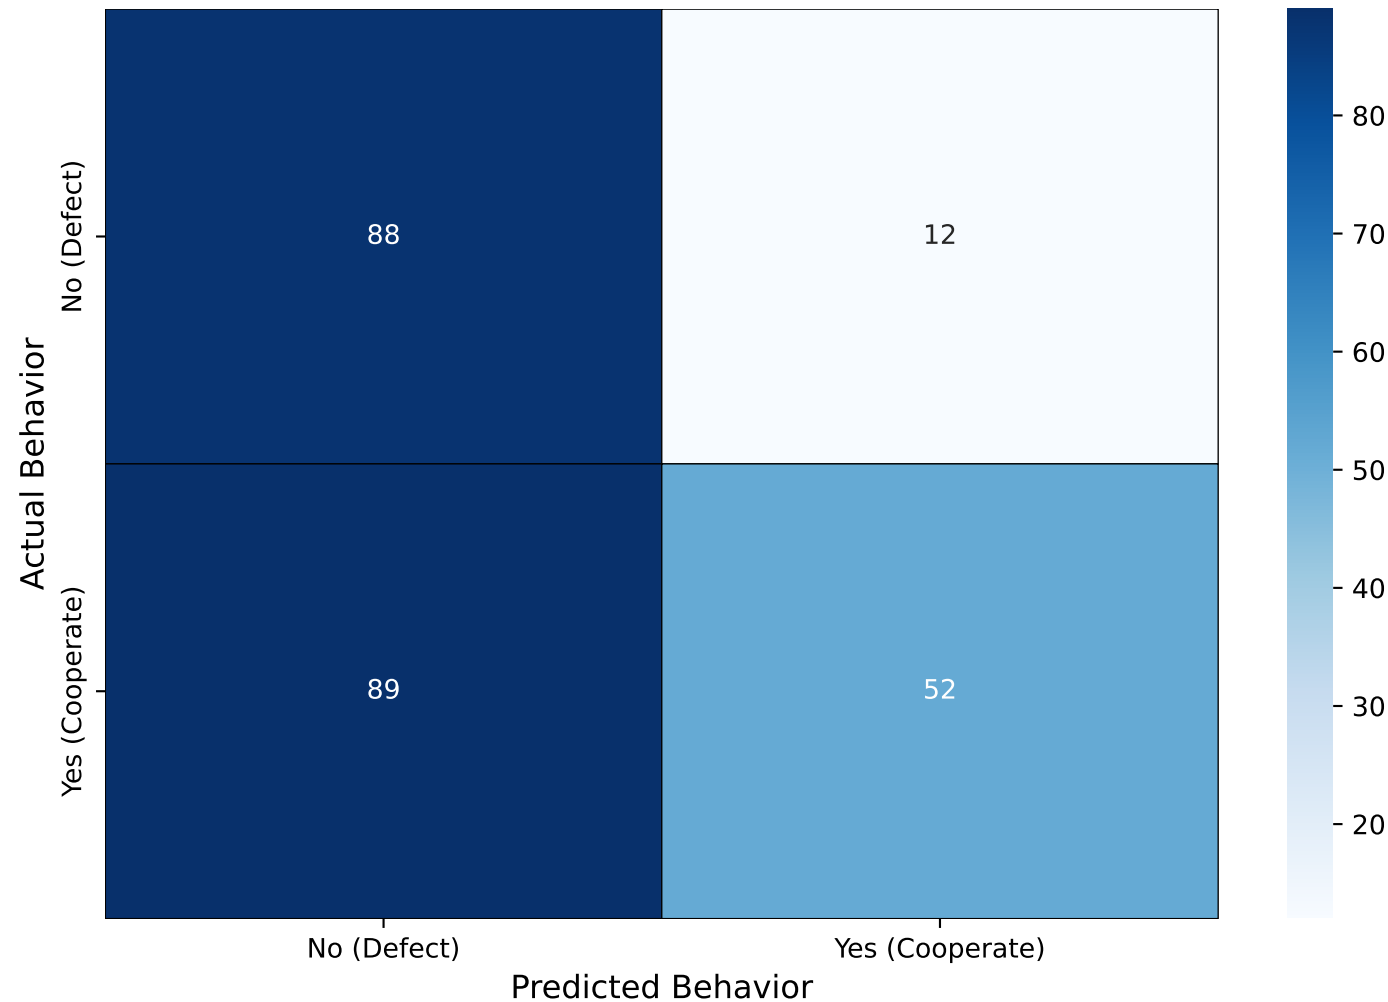

Supplement: supplementary_material [file Qwen_2.5_(7B)_(Instruct)_ZS_masked_confusion.pdf › Supplementary Material/FindNICE Benchmark/visualizations/confusion_matrices/Qwen_2.5_(7B)_(Instruct)_ZS_masked_confusion.pdf]

CM: Qwen 2.5 (7B) (Instruct)  
ZS Prompt, Obfuscated Program

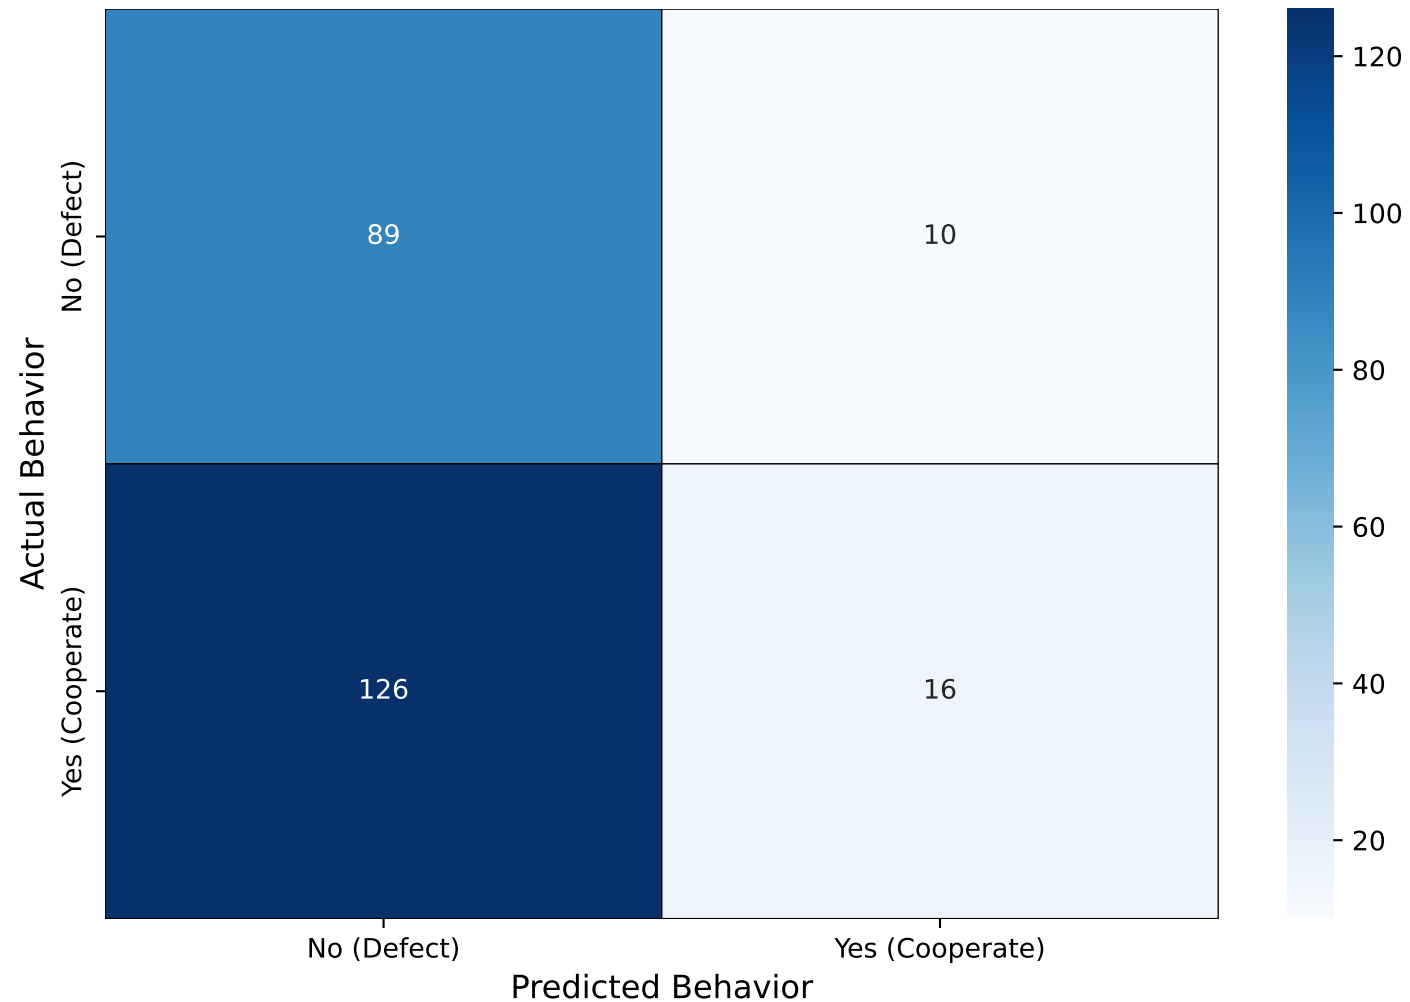

Supplement: supplementary_material [file Qwen_2.5_(7B)_(Instruct)_ZS_obfuscated_confusion.pdf › Supplementary Material/FindNICE Benchmark/visualizations/confusion_matrices/Qwen_2.5_(7B)_(Instruct)_ZS_obfuscated_confusion.pdf]

CM: Qwen 2.5 (7B) (Instruct)  
ZS Prompt, Unmasked Program

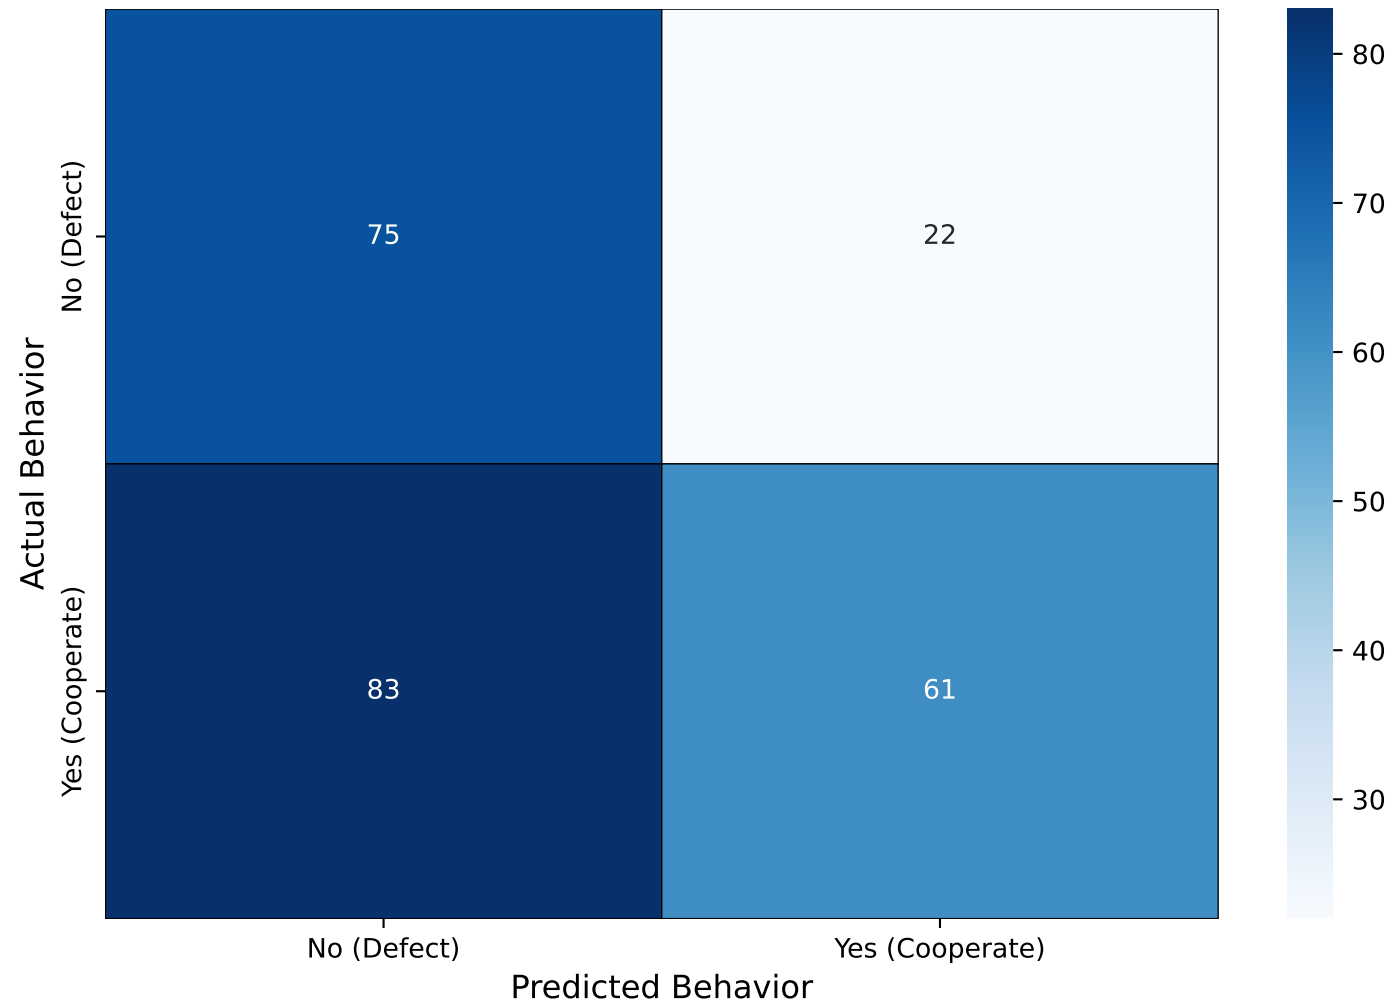

Supplement: supplementary_material [file Qwen_2.5_(7B)_(Instruct)_ZS_unmasked_confusion.pdf › Supplementary Material/FindNICE Benchmark/visualizations/confusion_matrices/Qwen_2.5_(7B)_(Instruct)_ZS_unmasked_confusion.pdf]

CM: Qwen 2.5 Coder (32B) (Instruct)  
COT Prompt, Masked Program

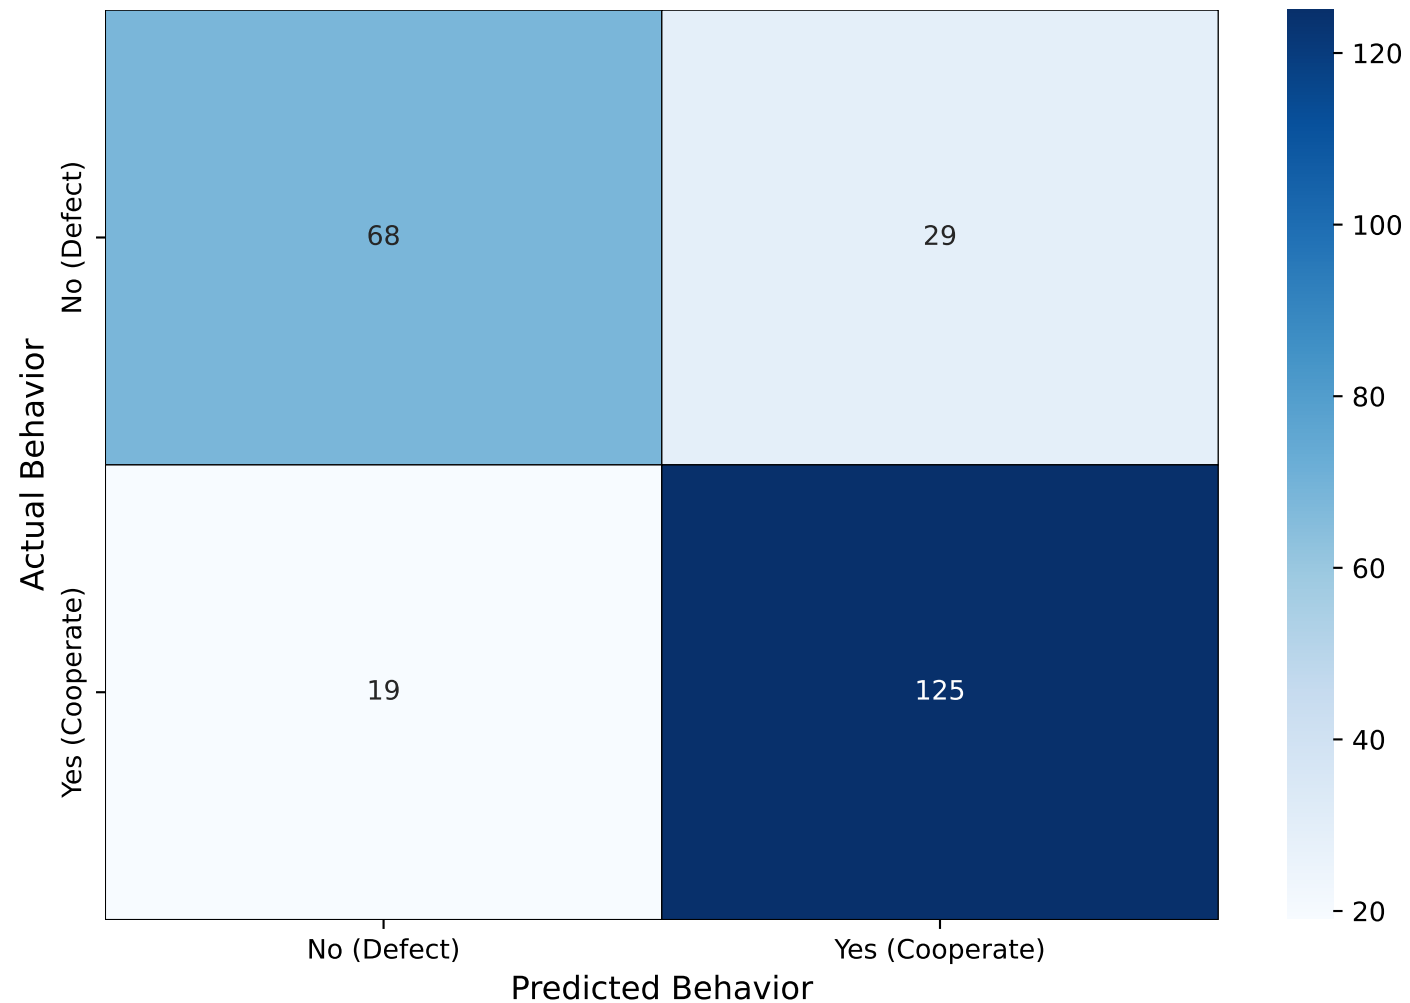

Supplement: supplementary_material [file Qwen_2.5_Coder_(32B)_(Instruct)_COT_masked_confusion.pdf › Supplementary Material/FindNICE Benchmark/visualizations/confusion_matrices/Qwen_2.5_Coder_(32B)_(Instruct)_COT_masked_confusion.pdf]

CM: Qwen 2.5 Coder (32B) (Instruct)  
COT Prompt, Obfuscated Program

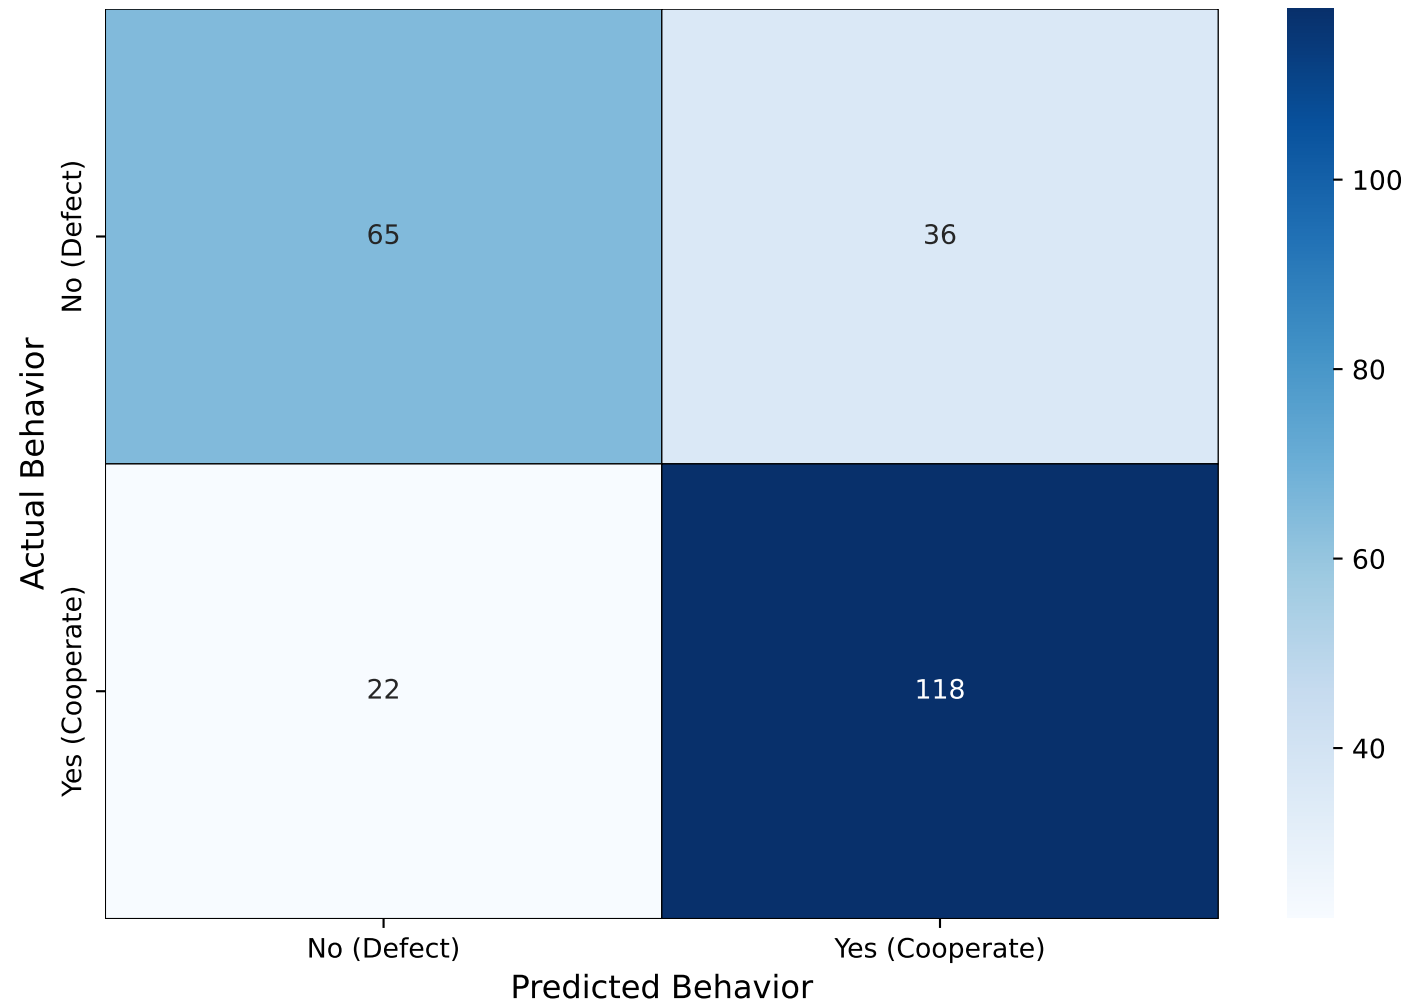

Supplement: supplementary_material [file Qwen_2.5_Coder_(32B)_(Instruct)_COT_obfuscated_confusion.pdf › Supplementary Material/FindNICE Benchmark/visualizations/confusion_matrices/Qwen_2.5_Coder_(32B)_(Instruct)_COT_obfuscated_confusion.pdf]

CM: Qwen 2.5 Coder (32B) (Instruct)  
COT Prompt, Unmasked Program

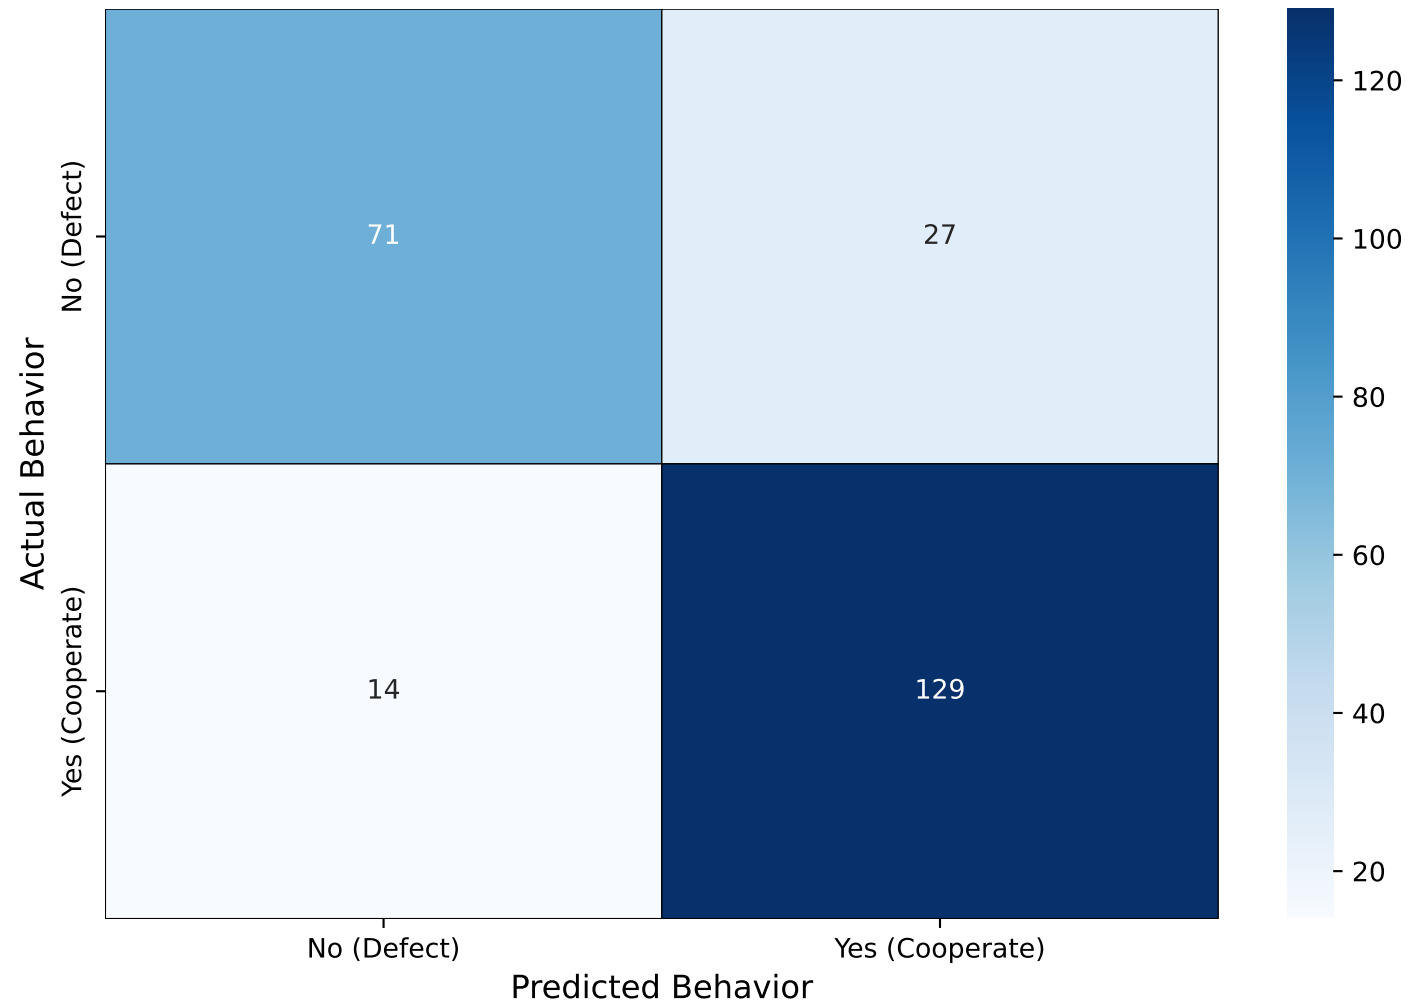

Supplement: supplementary_material [file Qwen_2.5_Coder_(32B)_(Instruct)_COT_unmasked_confusion.pdf › Supplementary Material/FindNICE Benchmark/visualizations/confusion_matrices/Qwen_2.5_Coder_(32B)_(Instruct)_COT_unmasked_confusion.pdf]

CM: Qwen 2.5 Coder (32B) (Instruct)  
ZS Prompt, Masked Program

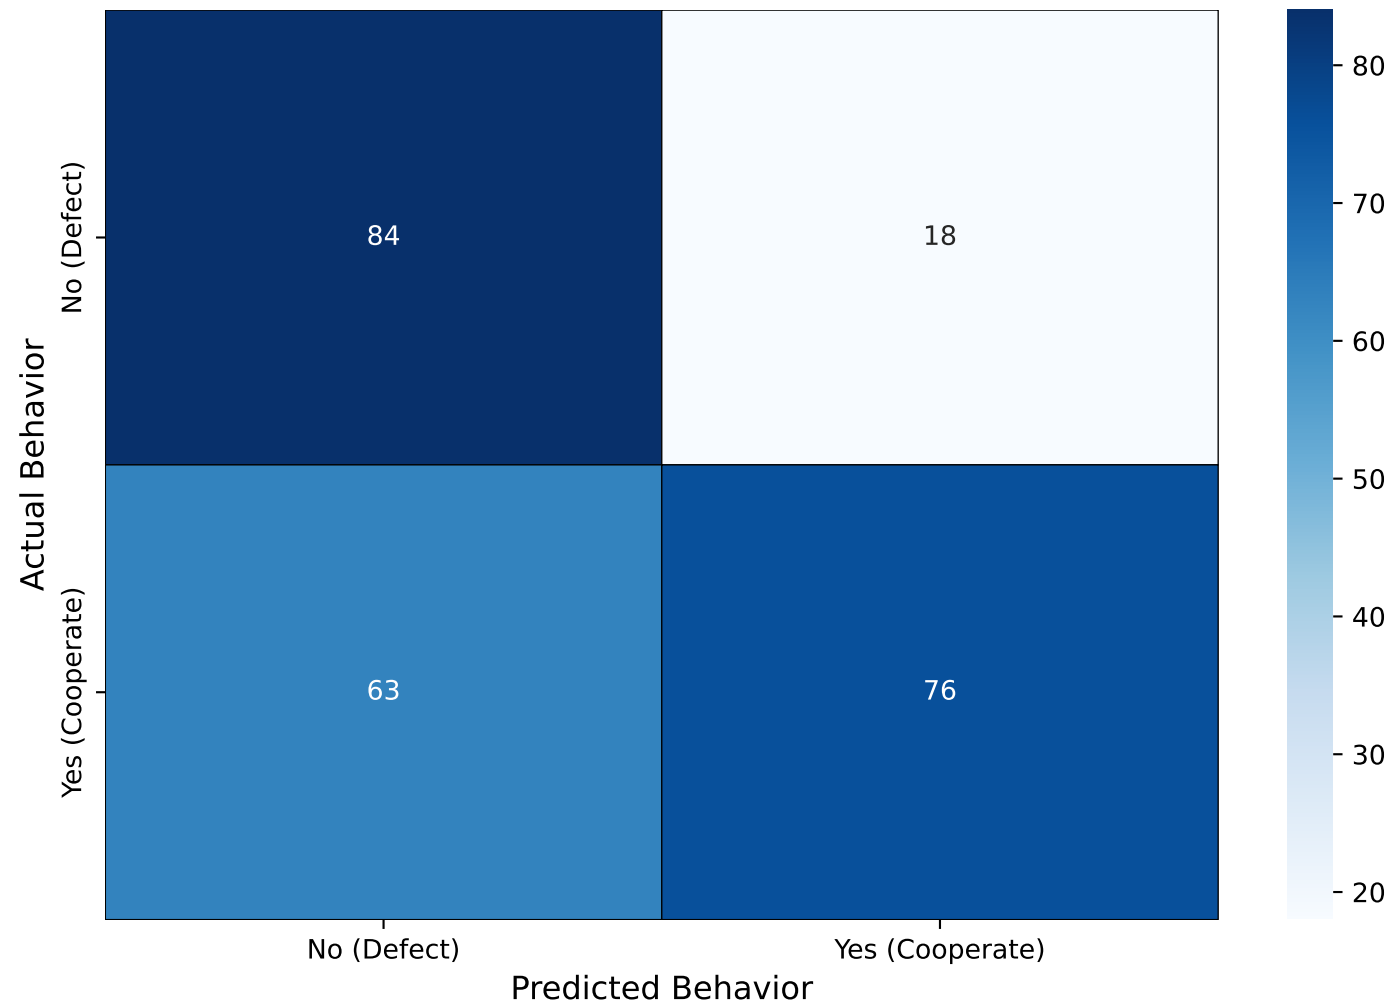

Supplement: supplementary_material [file Qwen_2.5_Coder_(32B)_(Instruct)_ZS_masked_confusion.pdf › Supplementary Material/FindNICE Benchmark/visualizations/confusion_matrices/Qwen_2.5_Coder_(32B)_(Instruct)_ZS_masked_confusion.pdf]

CM: Qwen 2.5 Coder (32B) (Instruct)  
ZS Prompt, Obfuscated Program

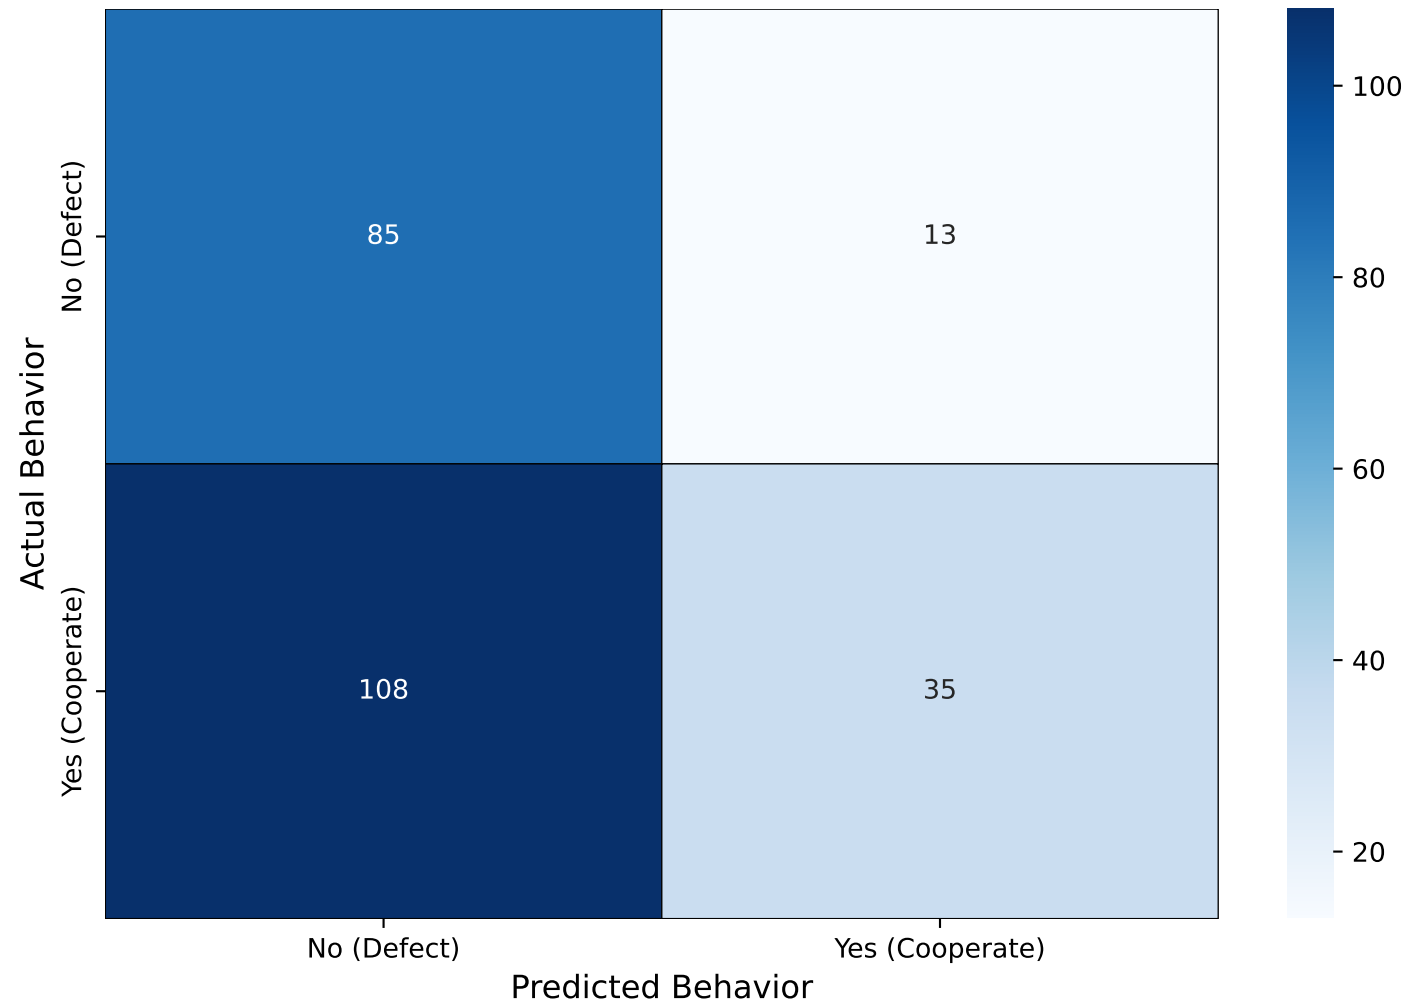

Supplement: supplementary_material [file Qwen_2.5_Coder_(32B)_(Instruct)_ZS_obfuscated_confusion.pdf › Supplementary Material/FindNICE Benchmark/visualizations/confusion_matrices/Qwen_2.5_Coder_(32B)_(Instruct)_ZS_obfuscated_confusion.pdf]

CM: Qwen 2.5 Coder (32B) (Instruct)  
ZS Prompt, Unmasked Program

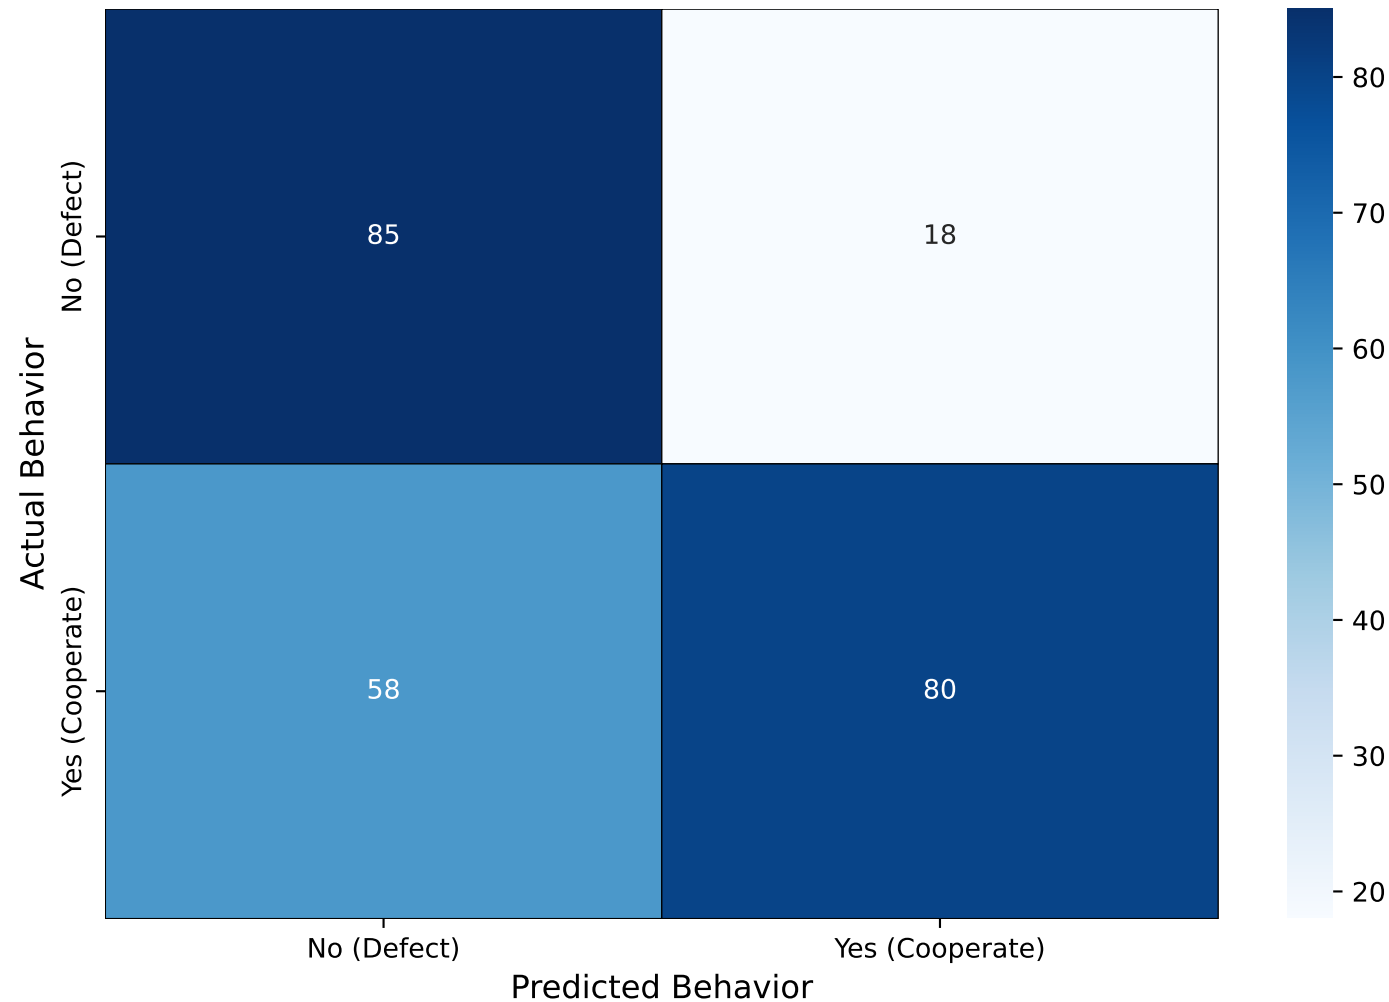

Supplement: supplementary_material [file Qwen_2.5_Coder_(32B)_(Instruct)_ZS_unmasked_confusion.pdf › Supplementary Material/FindNICE Benchmark/visualizations/confusion_matrices/Qwen_2.5_Coder_(32B)_(Instruct)_ZS_unmasked_confusion.pdf]

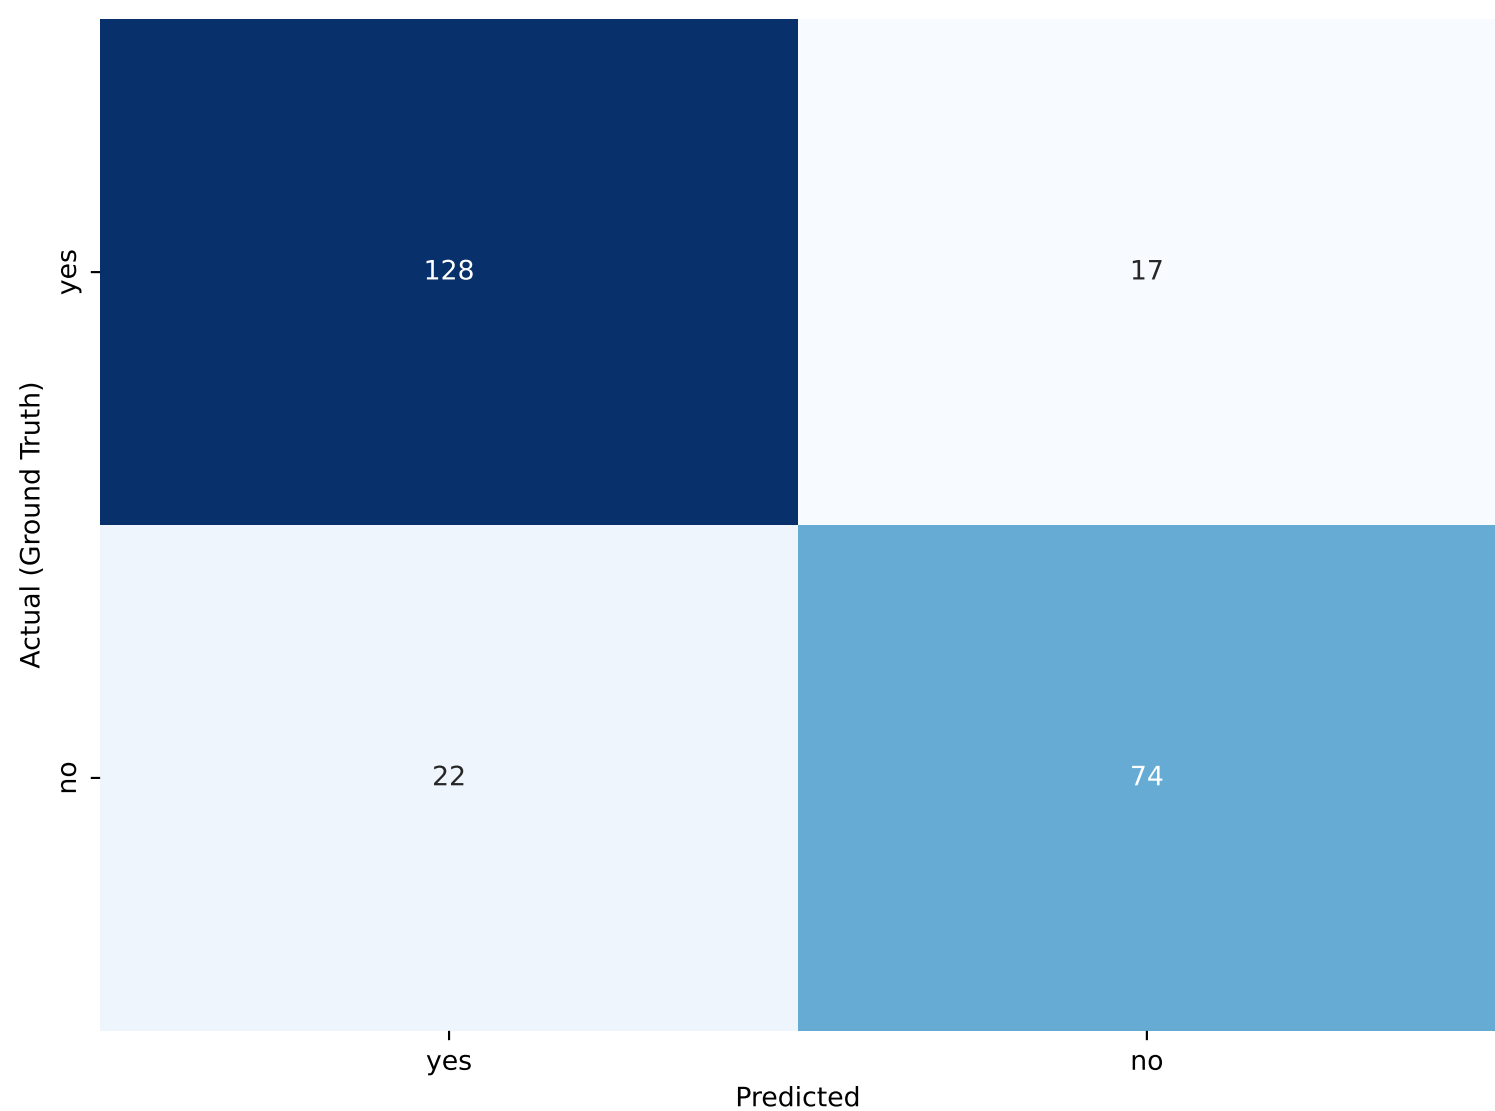

Supplement: supplementary_material [file cm_Qwen_Qwen2.5-72B-Instruct_masked_COT.pdf › Supplementary Material/FindNICE Benchmark/visualizations/confusion_matrices/cm_Qwen_Qwen2.5-72B-Instruct_masked_COT.pdf]

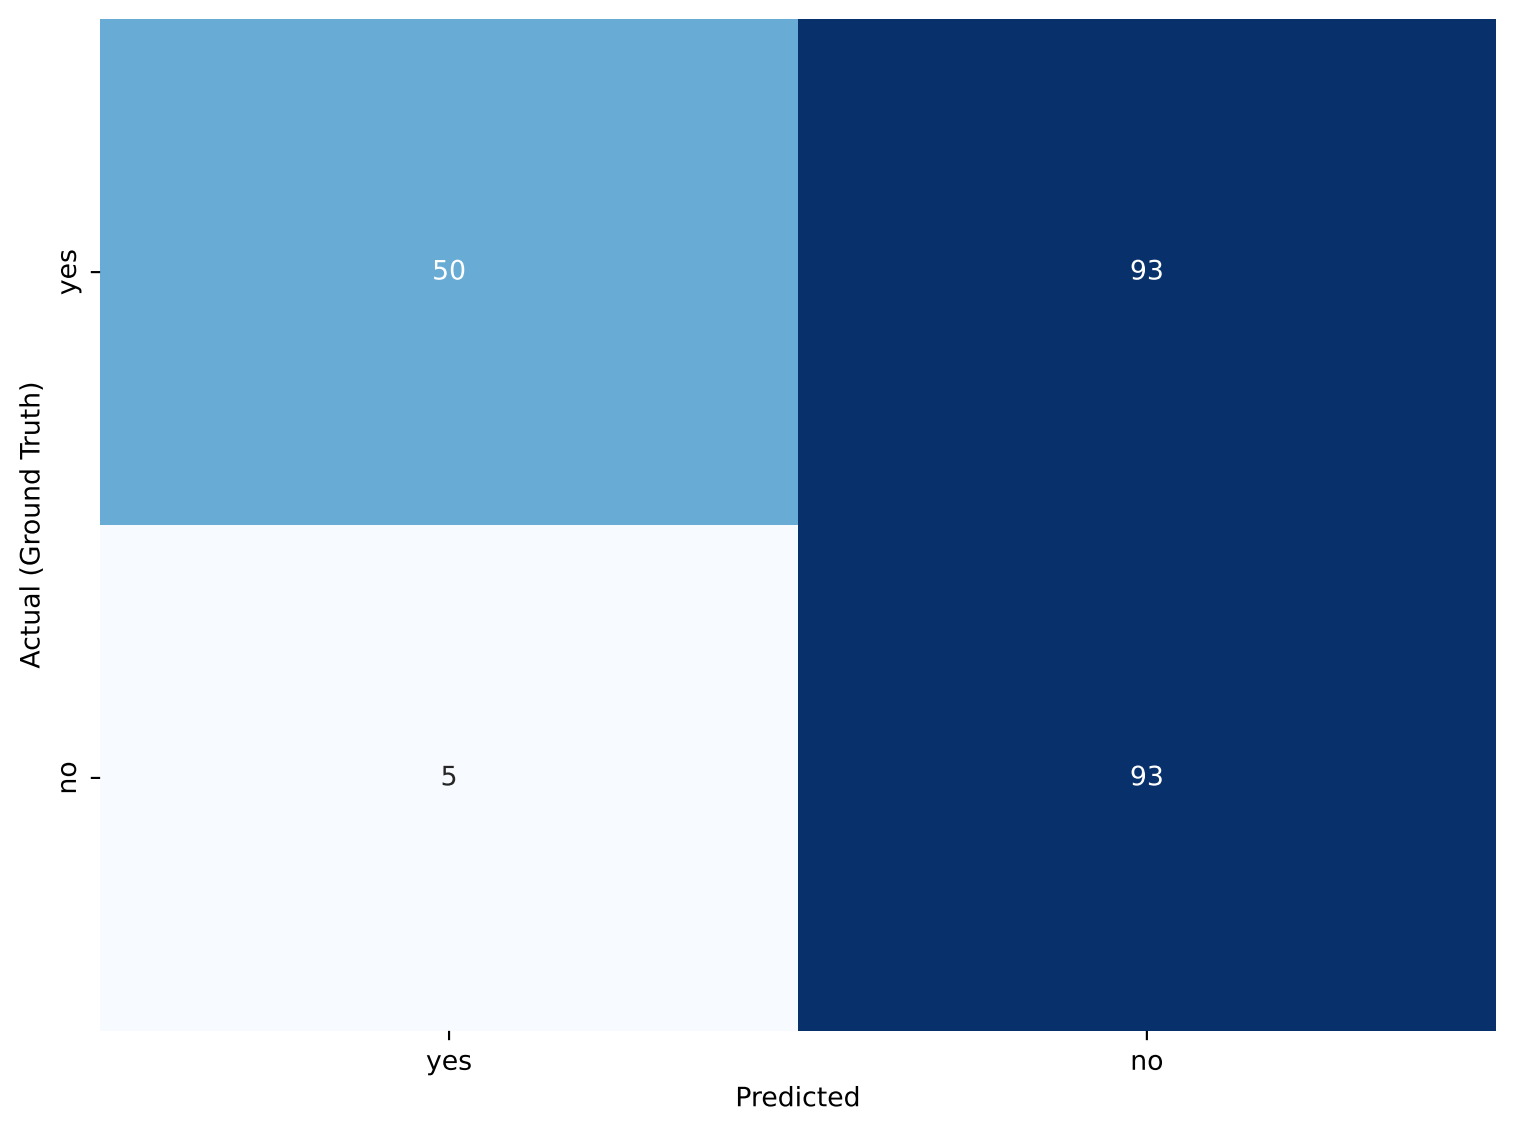

Supplement: supplementary_material [file cm_Qwen_Qwen2.5-72B-Instruct_masked_ZS.pdf › Supplementary Material/FindNICE Benchmark/visualizations/confusion_matrices/cm_Qwen_Qwen2.5-72B-Instruct_masked_ZS.pdf]

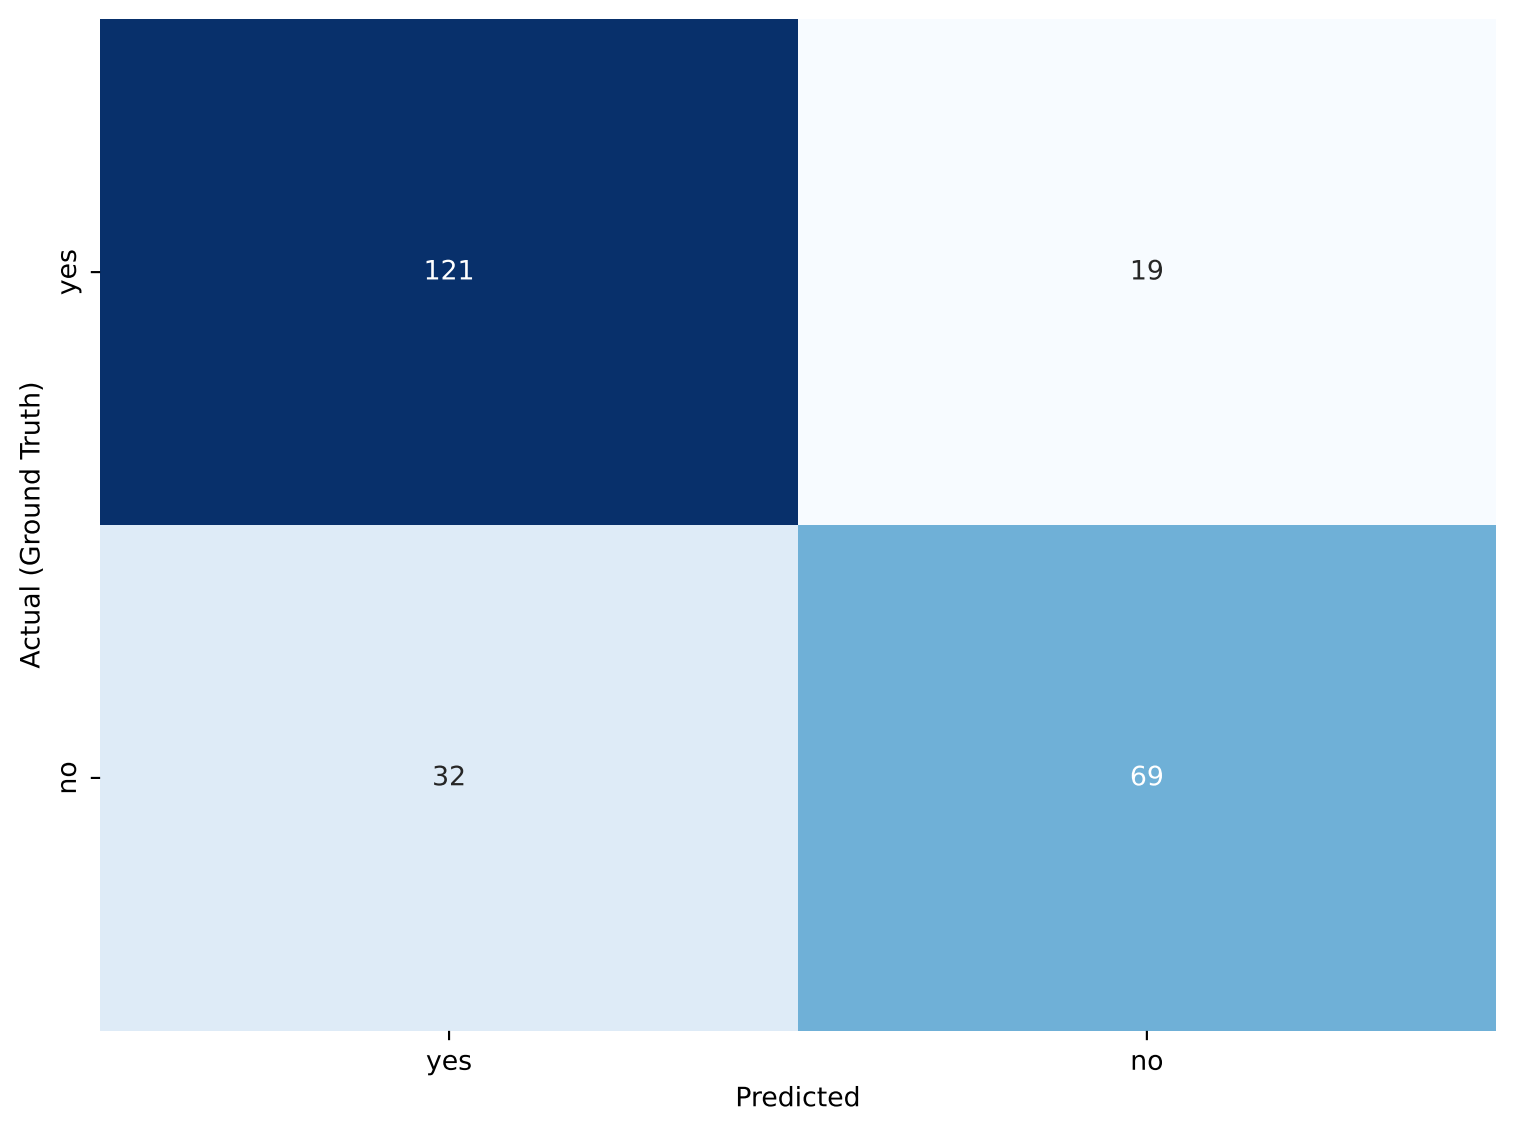

Supplement: supplementary_material [file cm_Qwen_Qwen2.5-72B-Instruct_obfuscated_COT.pdf › Supplementary Material/FindNICE Benchmark/visualizations/confusion_matrices/cm_Qwen_Qwen2.5-72B-Instruct_obfuscated_COT.pdf]

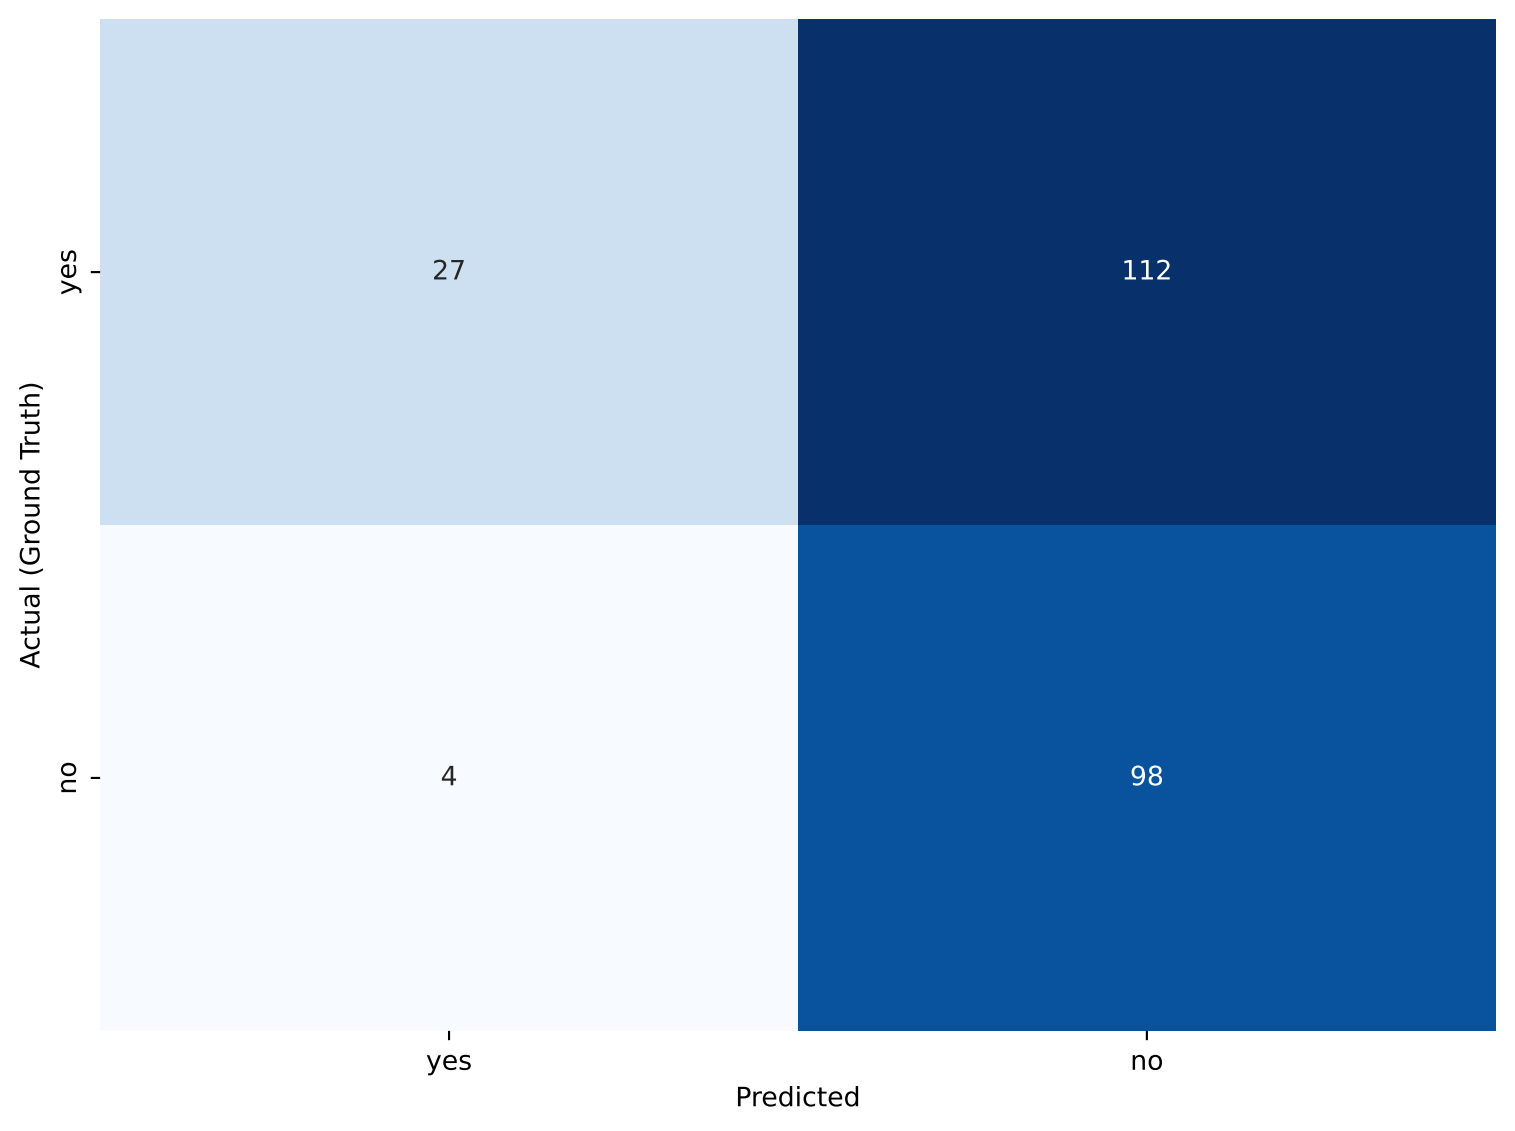

Supplement: supplementary_material [file cm_Qwen_Qwen2.5-72B-Instruct_obfuscated_ZS.pdf › Supplementary Material/FindNICE Benchmark/visualizations/confusion_matrices/cm_Qwen_Qwen2.5-72B-Instruct_obfuscated_ZS.pdf]

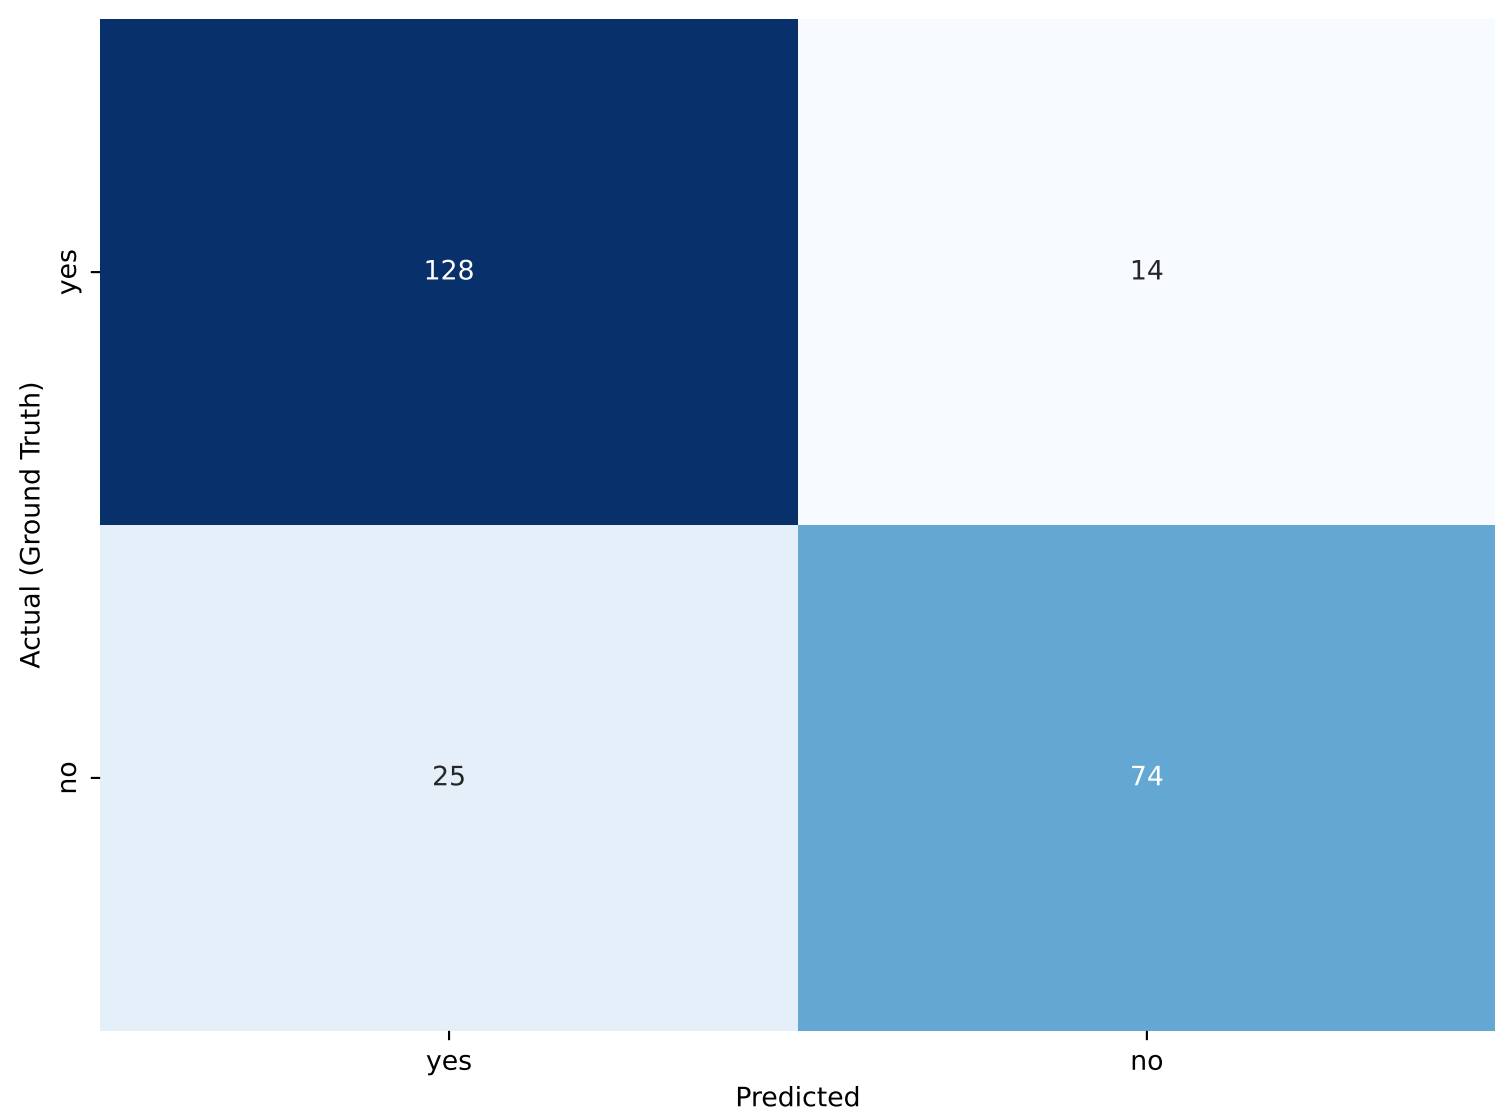

Supplement: supplementary_material [file cm_Qwen_Qwen2.5-72B-Instruct_unmasked_COT.pdf › Supplementary Material/FindNICE Benchmark/visualizations/confusion_matrices/cm_Qwen_Qwen2.5-72B-Instruct_unmasked_COT.pdf]

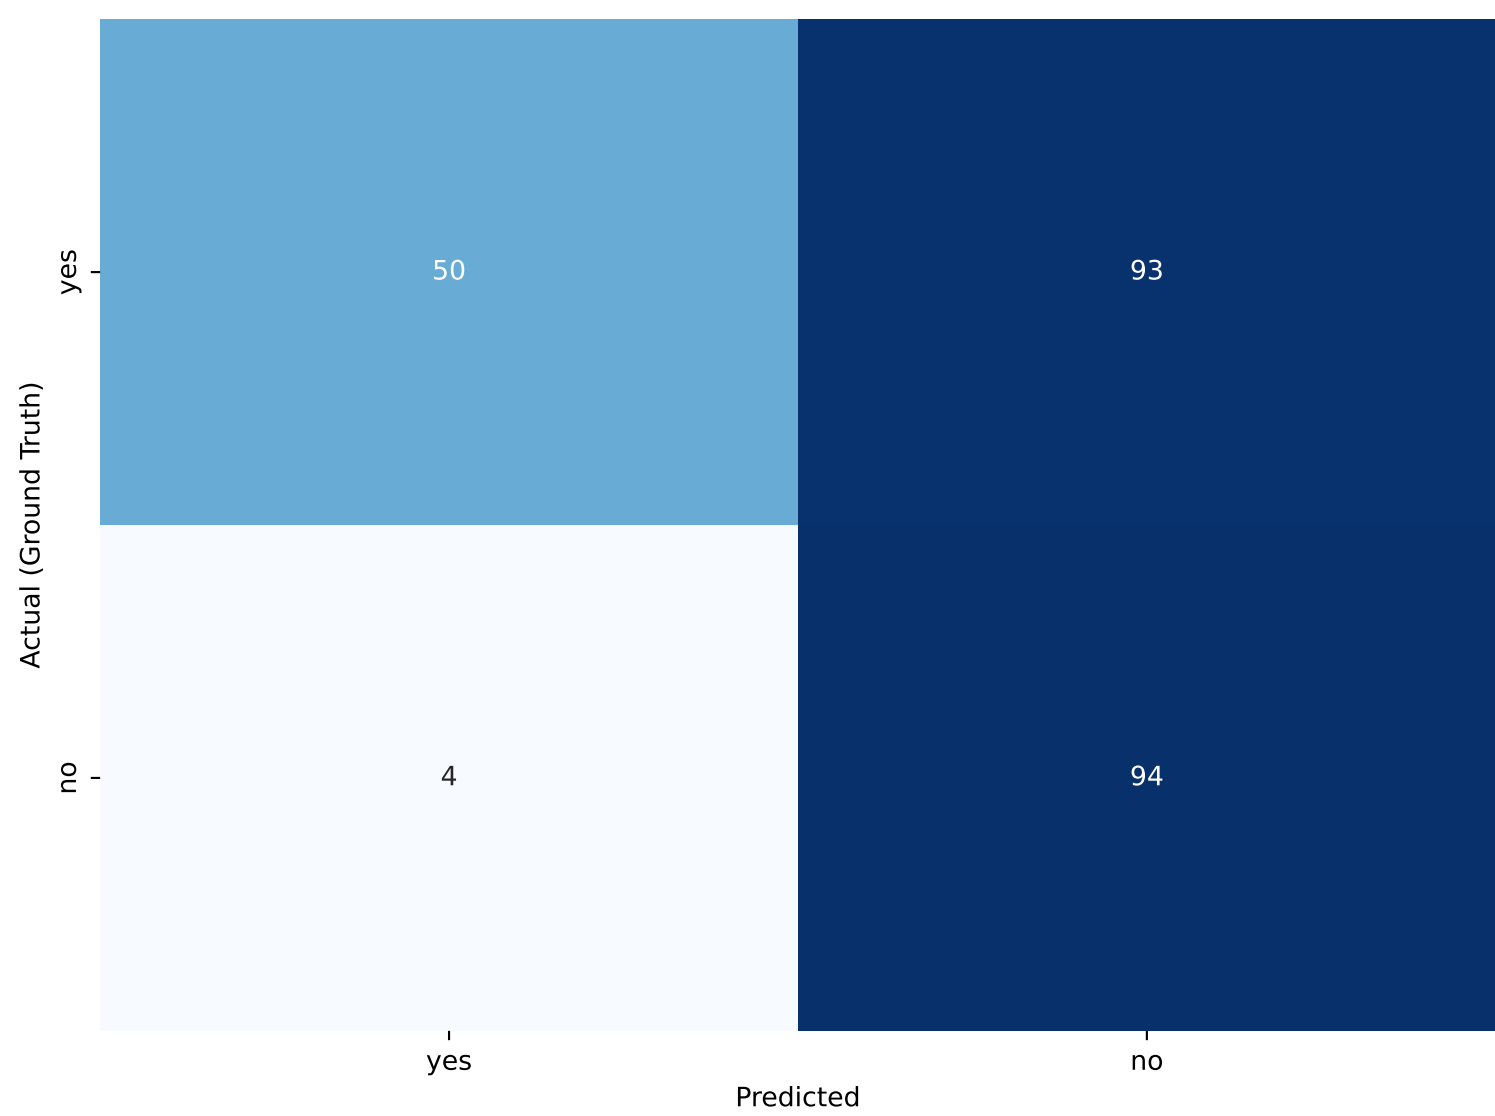

Supplement: supplementary_material [file cm_Qwen_Qwen2.5-72B-Instruct_unmasked_ZS.pdf › Supplementary Material/FindNICE Benchmark/visualizations/confusion_matrices/cm_Qwen_Qwen2.5-72B-Instruct_unmasked_ZS.pdf]

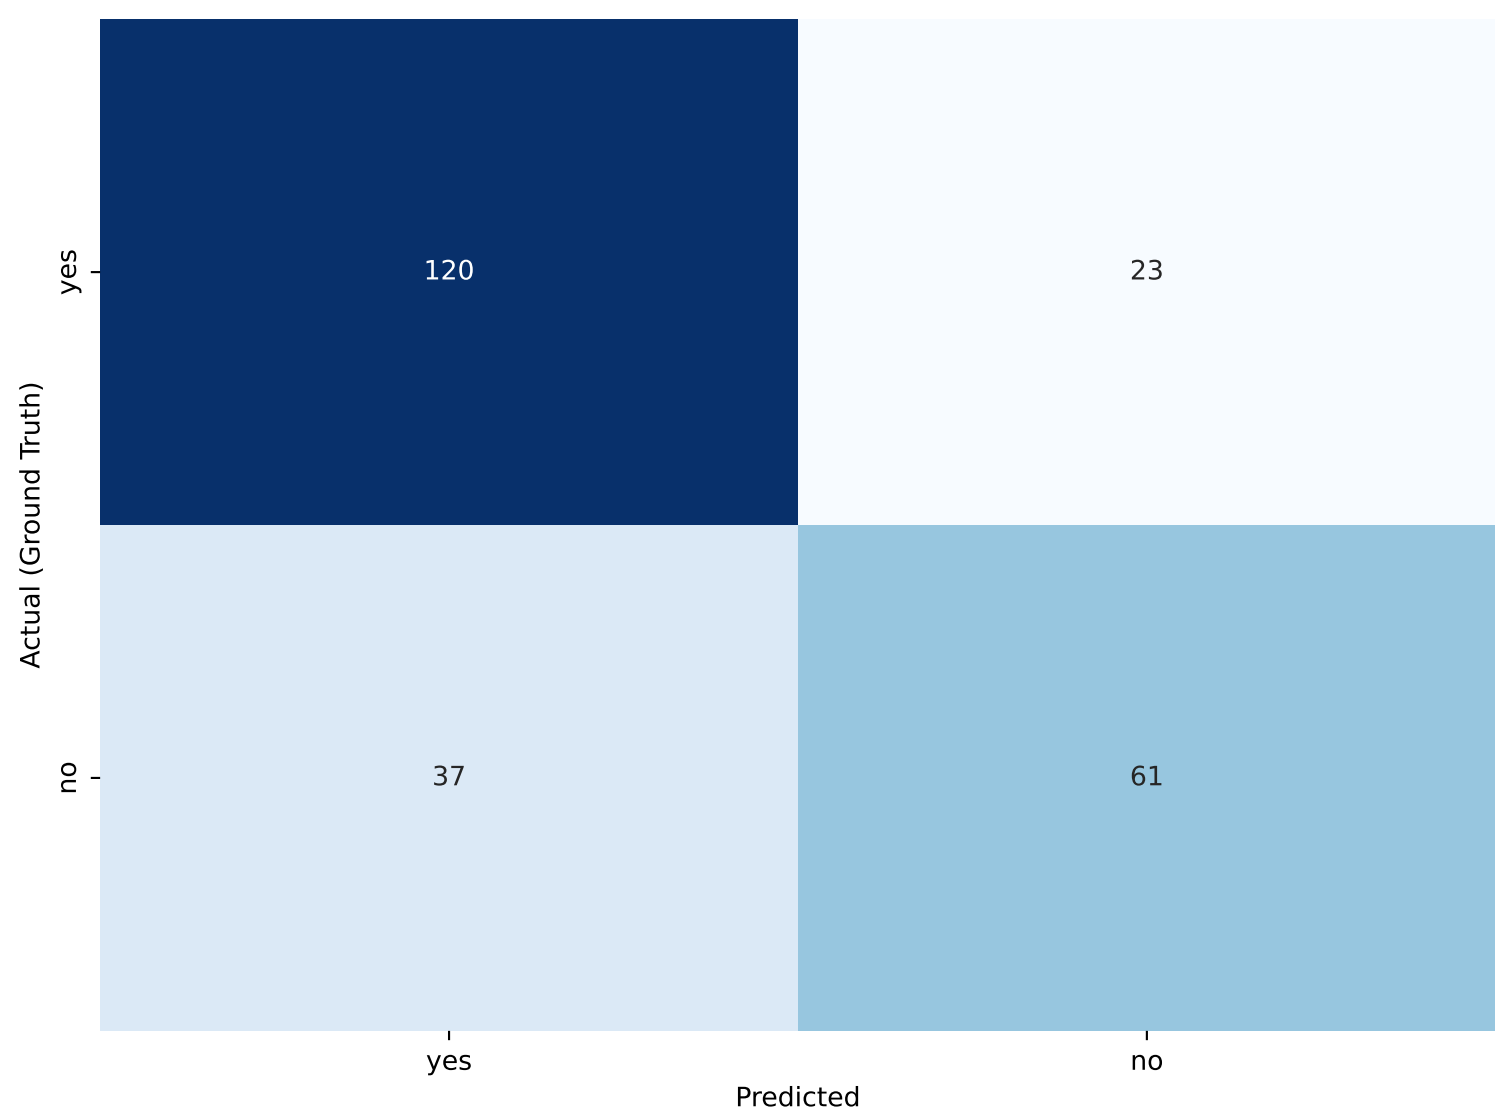

Supplement: supplementary_material [file cm_Qwen_Qwen2.5-7B-Instruct_masked_COT.pdf › Supplementary Material/FindNICE Benchmark/visualizations/confusion_matrices/cm_Qwen_Qwen2.5-7B-Instruct_masked_COT.pdf]

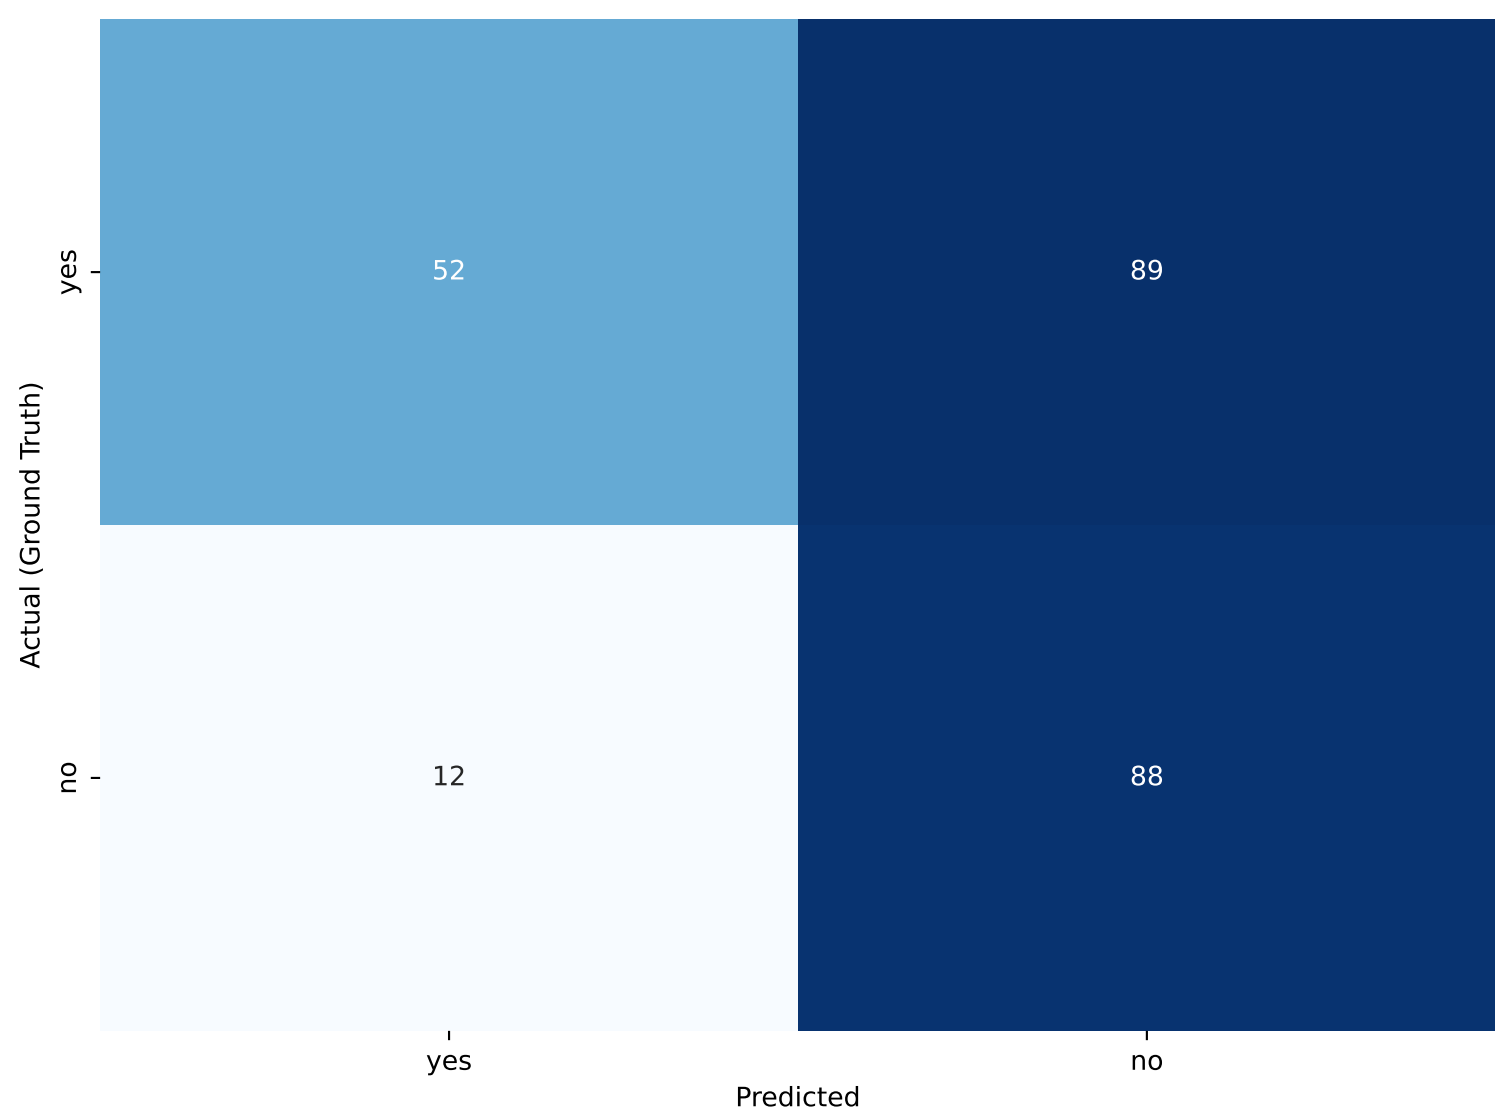

Supplement: supplementary_material [file cm_Qwen_Qwen2.5-7B-Instruct_masked_ZS.pdf › Supplementary Material/FindNICE Benchmark/visualizations/confusion_matrices/cm_Qwen_Qwen2.5-7B-Instruct_masked_ZS.pdf]

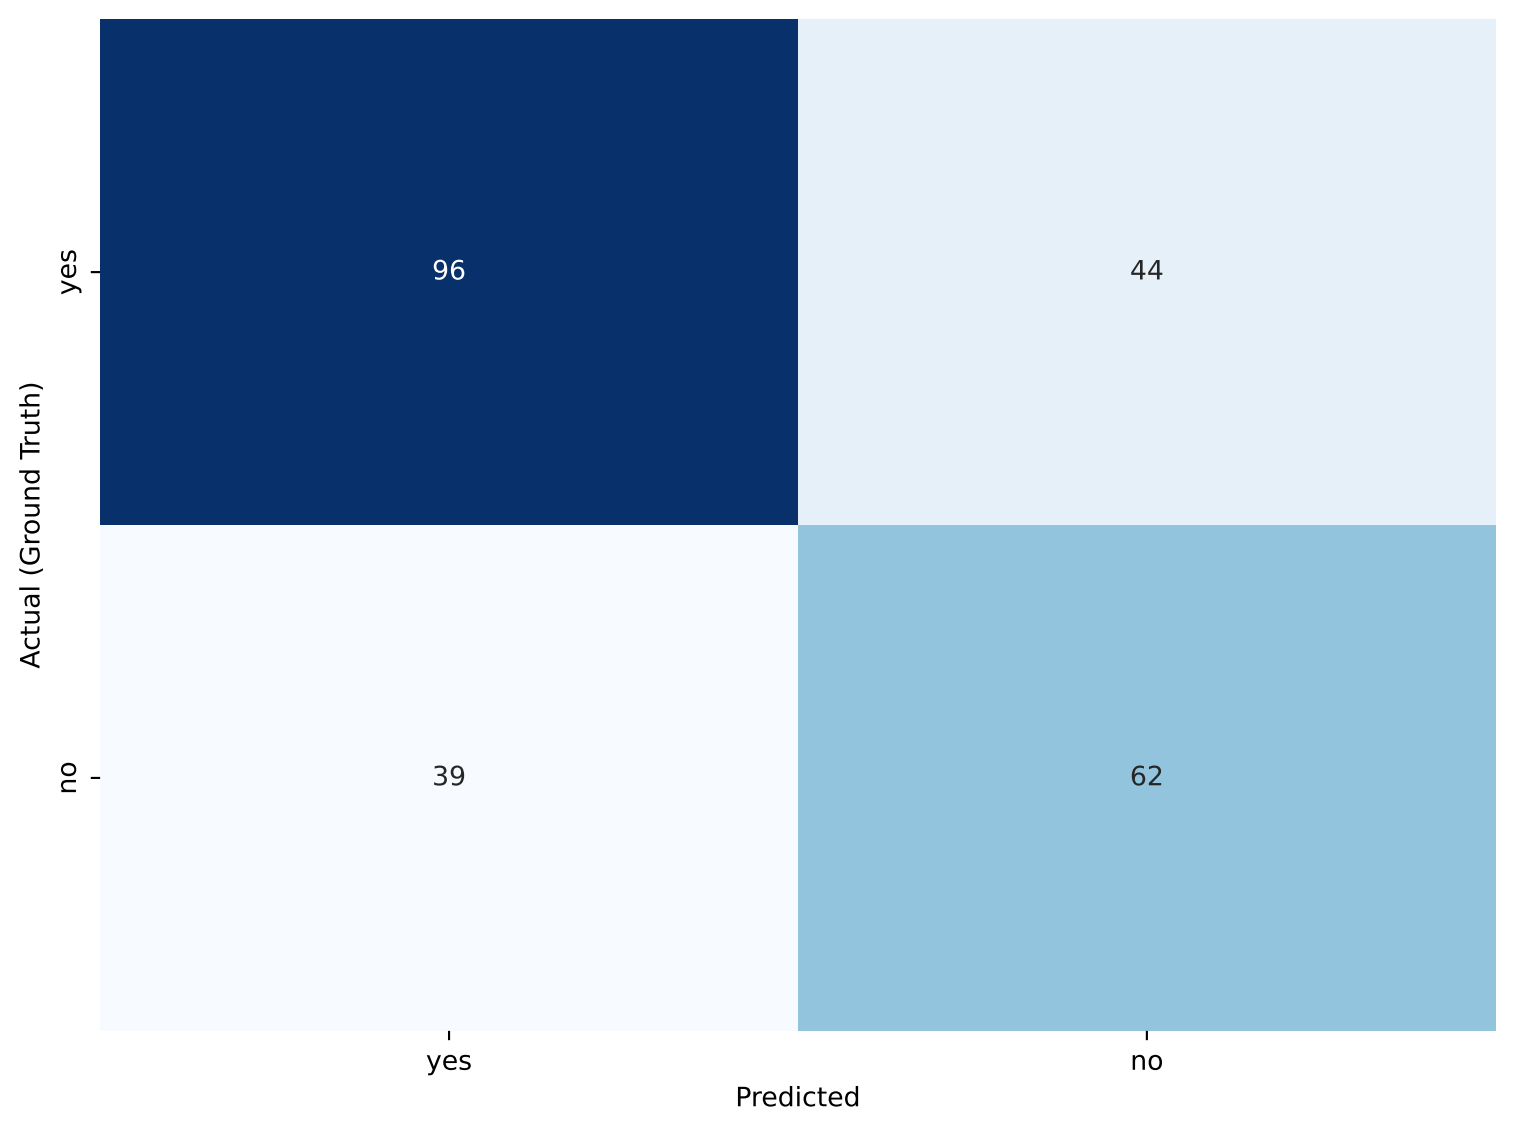

Supplement: supplementary_material [file cm_Qwen_Qwen2.5-7B-Instruct_obfuscated_COT.pdf › Supplementary Material/FindNICE Benchmark/visualizations/confusion_matrices/cm_Qwen_Qwen2.5-7B-Instruct_obfuscated_COT.pdf]

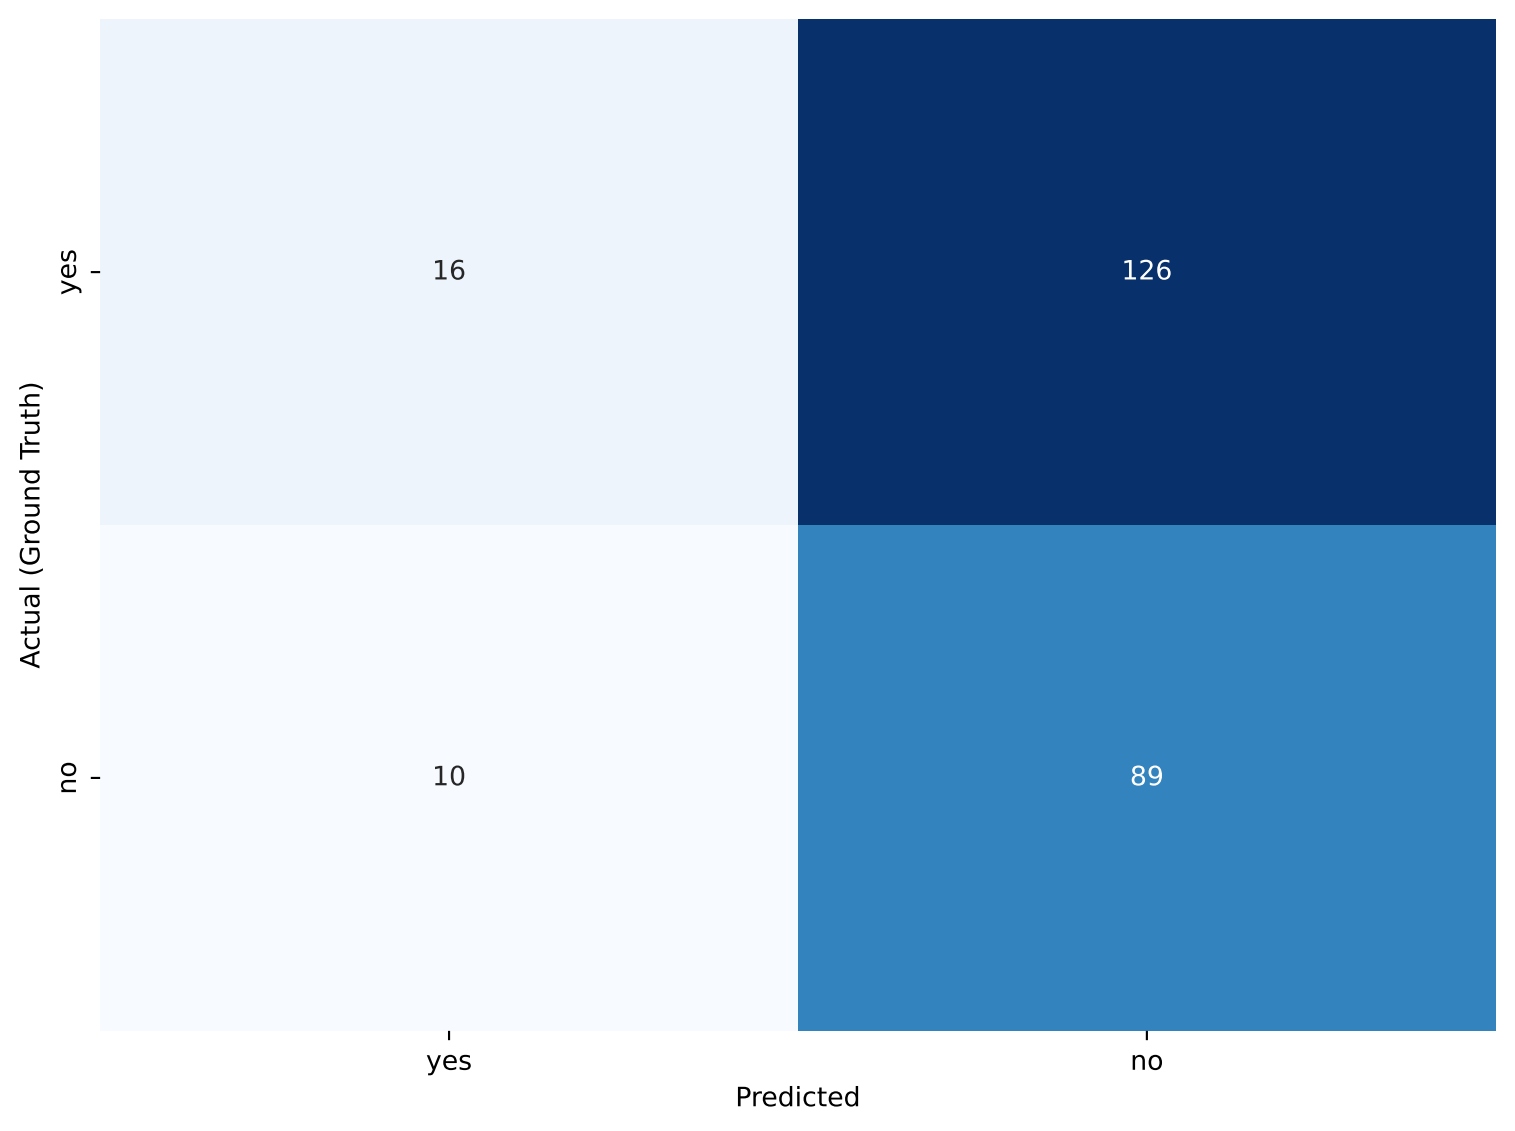

Supplement: supplementary_material [file cm_Qwen_Qwen2.5-7B-Instruct_obfuscated_ZS.pdf › Supplementary Material/FindNICE Benchmark/visualizations/confusion_matrices/cm_Qwen_Qwen2.5-7B-Instruct_obfuscated_ZS.pdf]

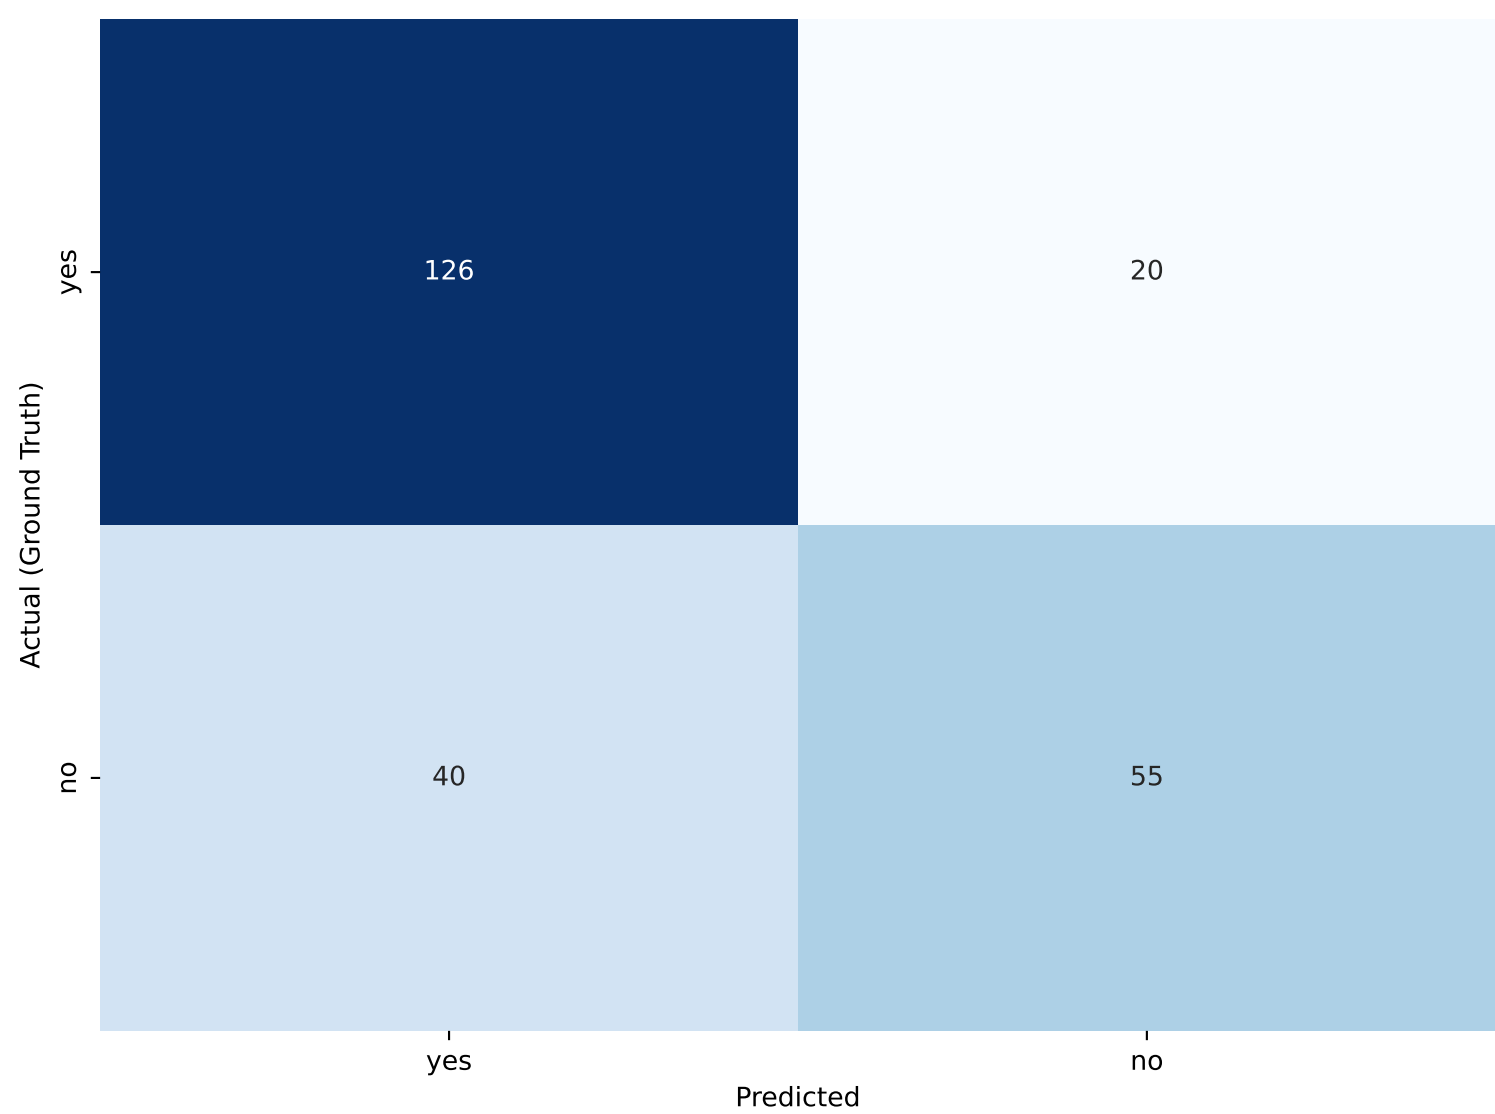

Supplement: supplementary_material [file cm_Qwen_Qwen2.5-7B-Instruct_unmasked_COT.pdf › Supplementary Material/FindNICE Benchmark/visualizations/confusion_matrices/cm_Qwen_Qwen2.5-7B-Instruct_unmasked_COT.pdf]

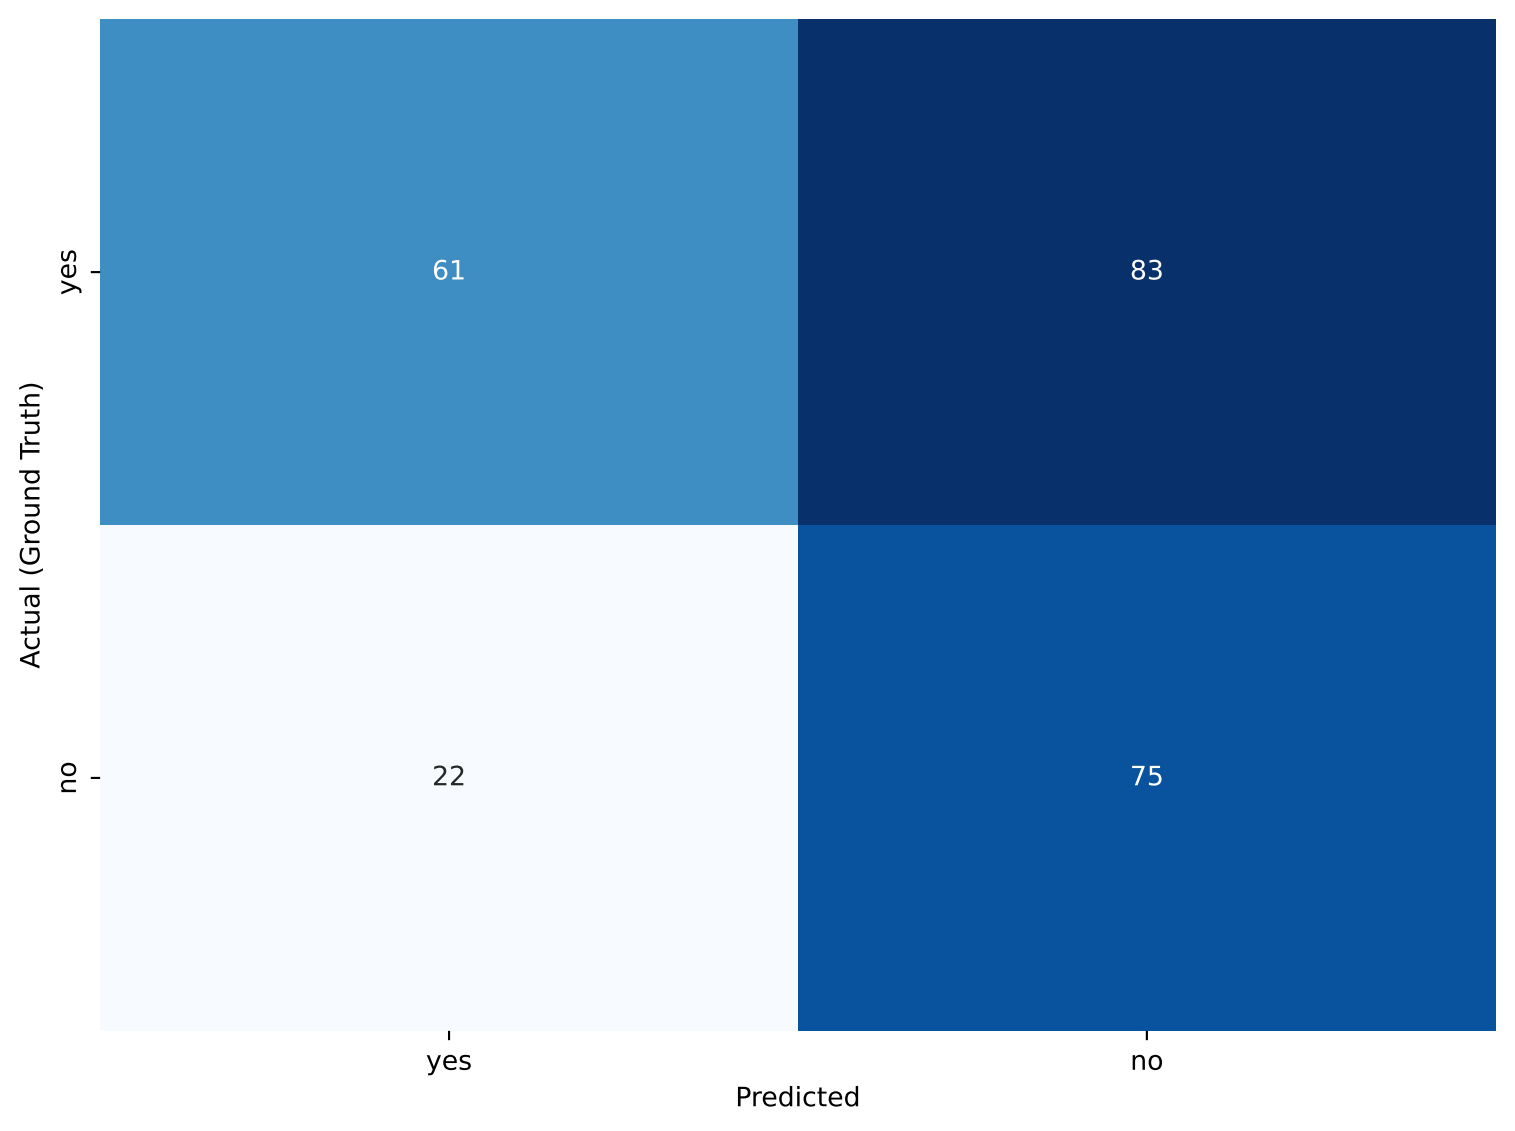

Supplement: supplementary_material [file cm_Qwen_Qwen2.5-7B-Instruct_unmasked_ZS.pdf › Supplementary Material/FindNICE Benchmark/visualizations/confusion_matrices/cm_Qwen_Qwen2.5-7B-Instruct_unmasked_ZS.pdf]

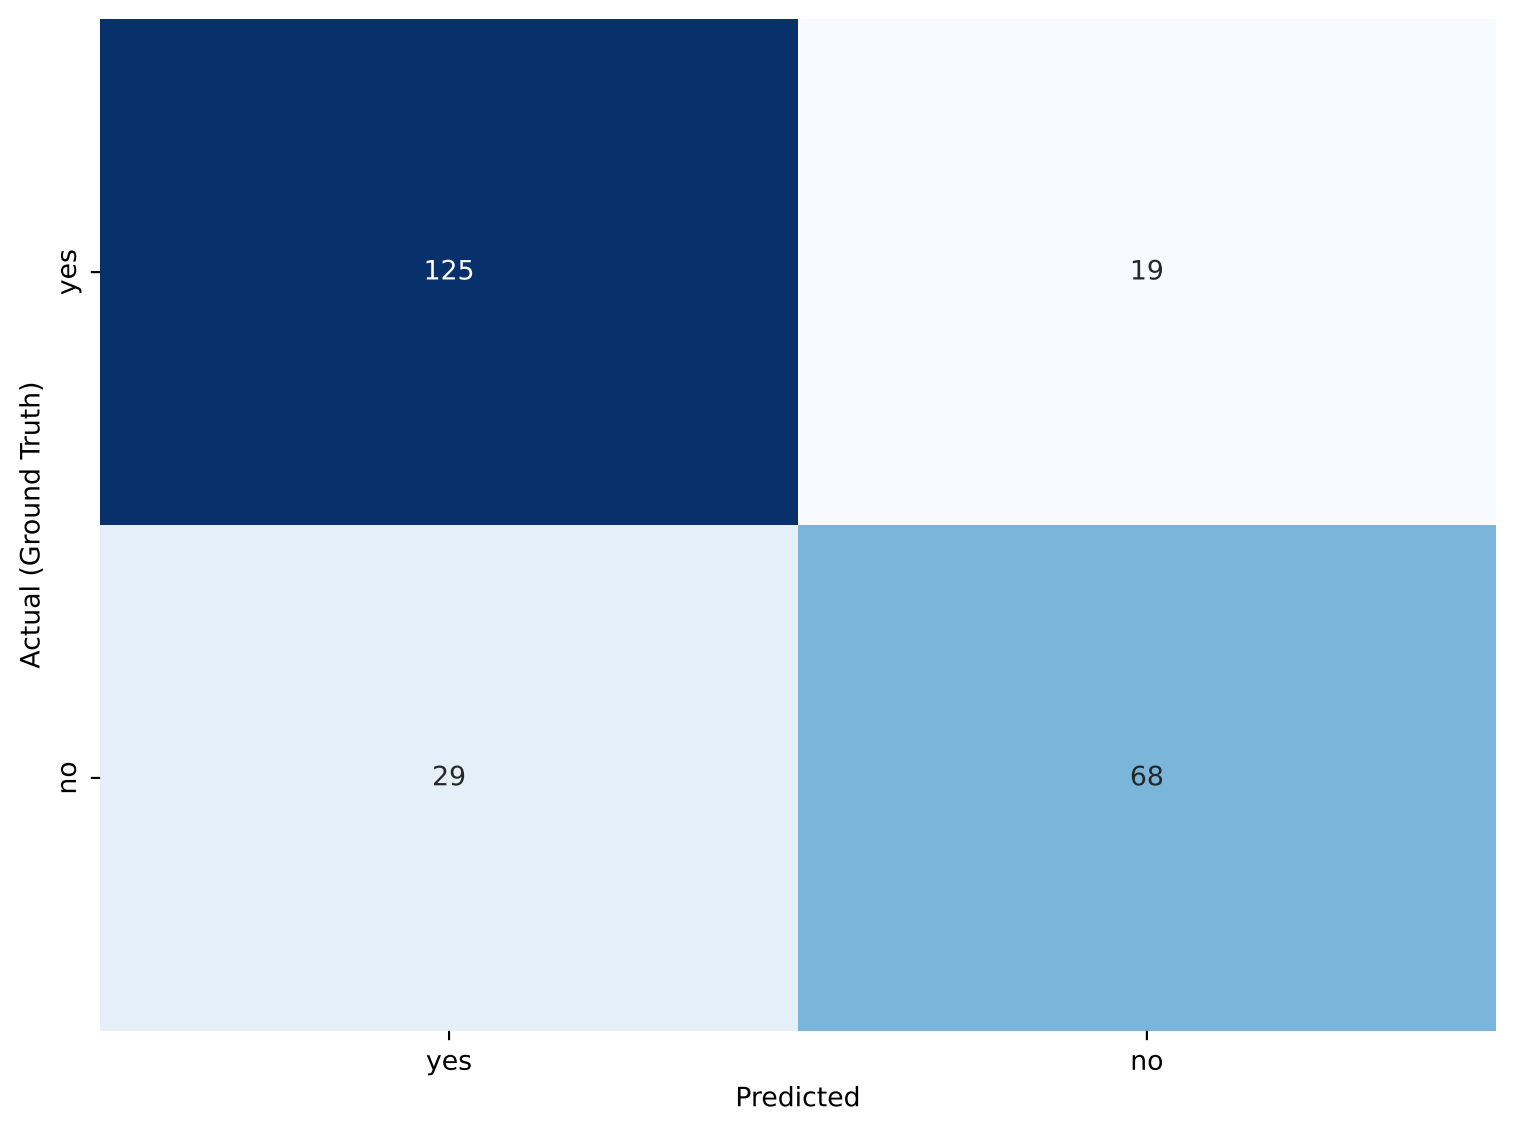

Supplement: supplementary_material [file cm_Qwen_Qwen2.5-Coder-32B-Instruct_masked_COT.pdf › Supplementary Material/FindNICE Benchmark/visualizations/confusion_matrices/cm_Qwen_Qwen2.5-Coder-32B-Instruct_masked_COT.pdf]

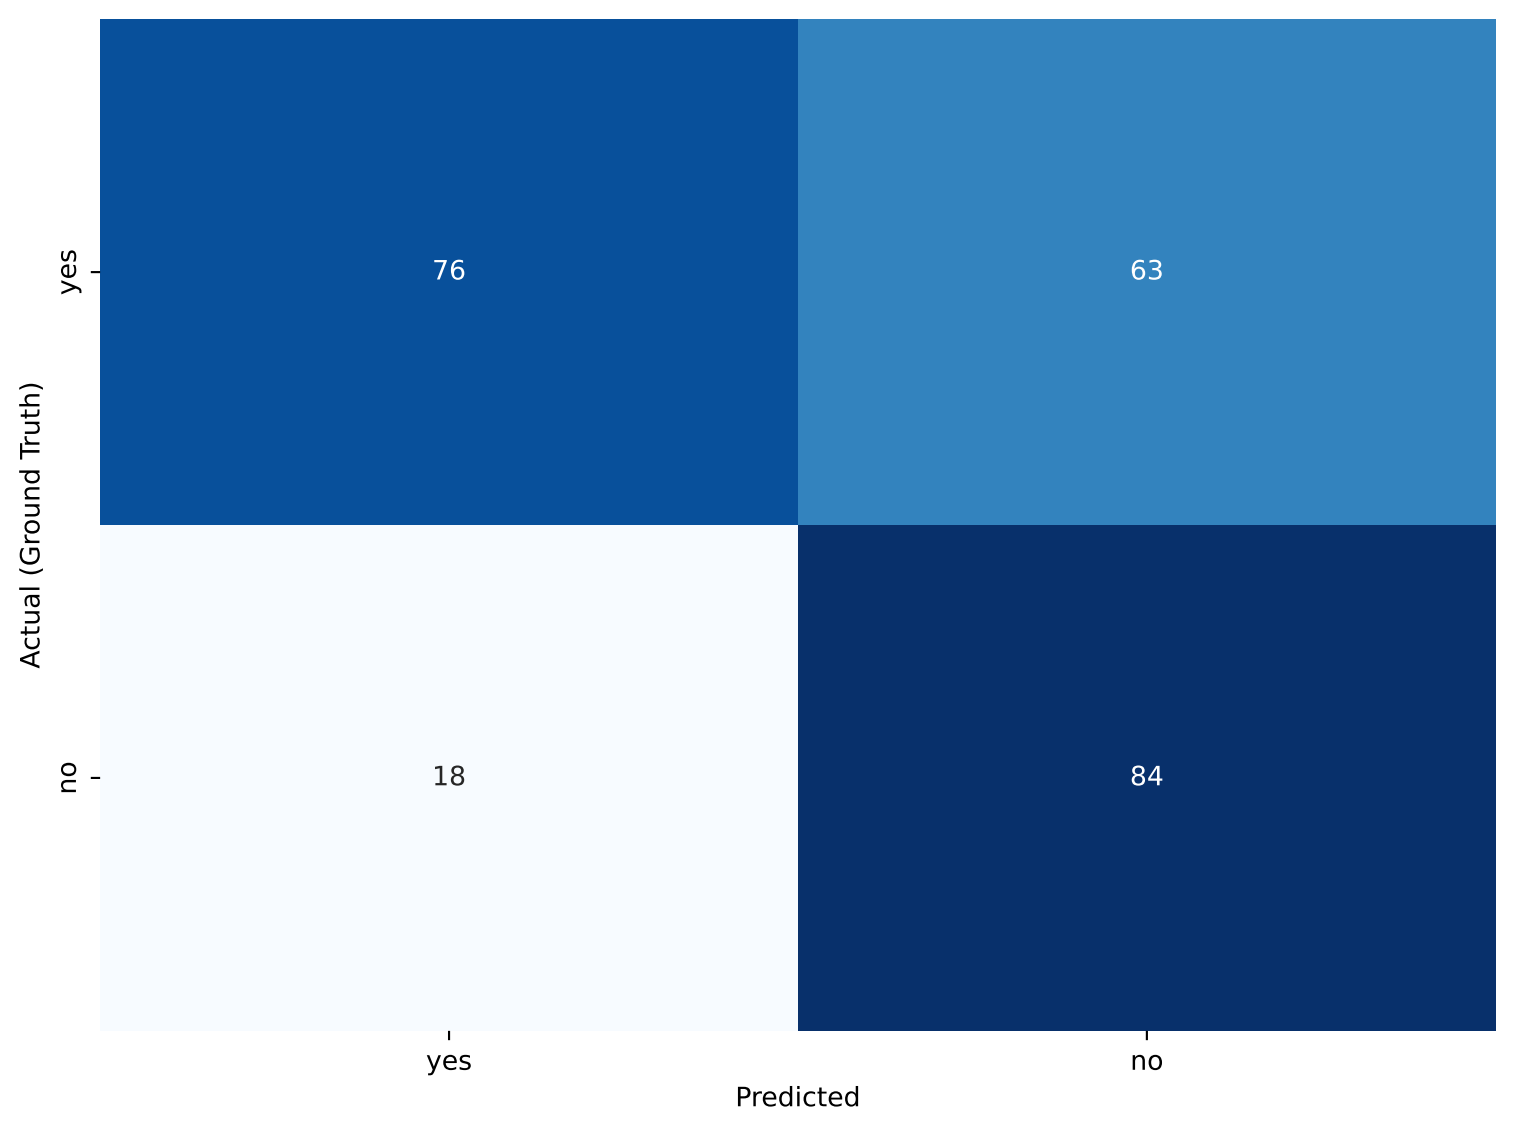

Supplement: supplementary_material [file cm_Qwen_Qwen2.5-Coder-32B-Instruct_masked_ZS.pdf › Supplementary Material/FindNICE Benchmark/visualizations/confusion_matrices/cm_Qwen_Qwen2.5-Coder-32B-Instruct_masked_ZS.pdf]

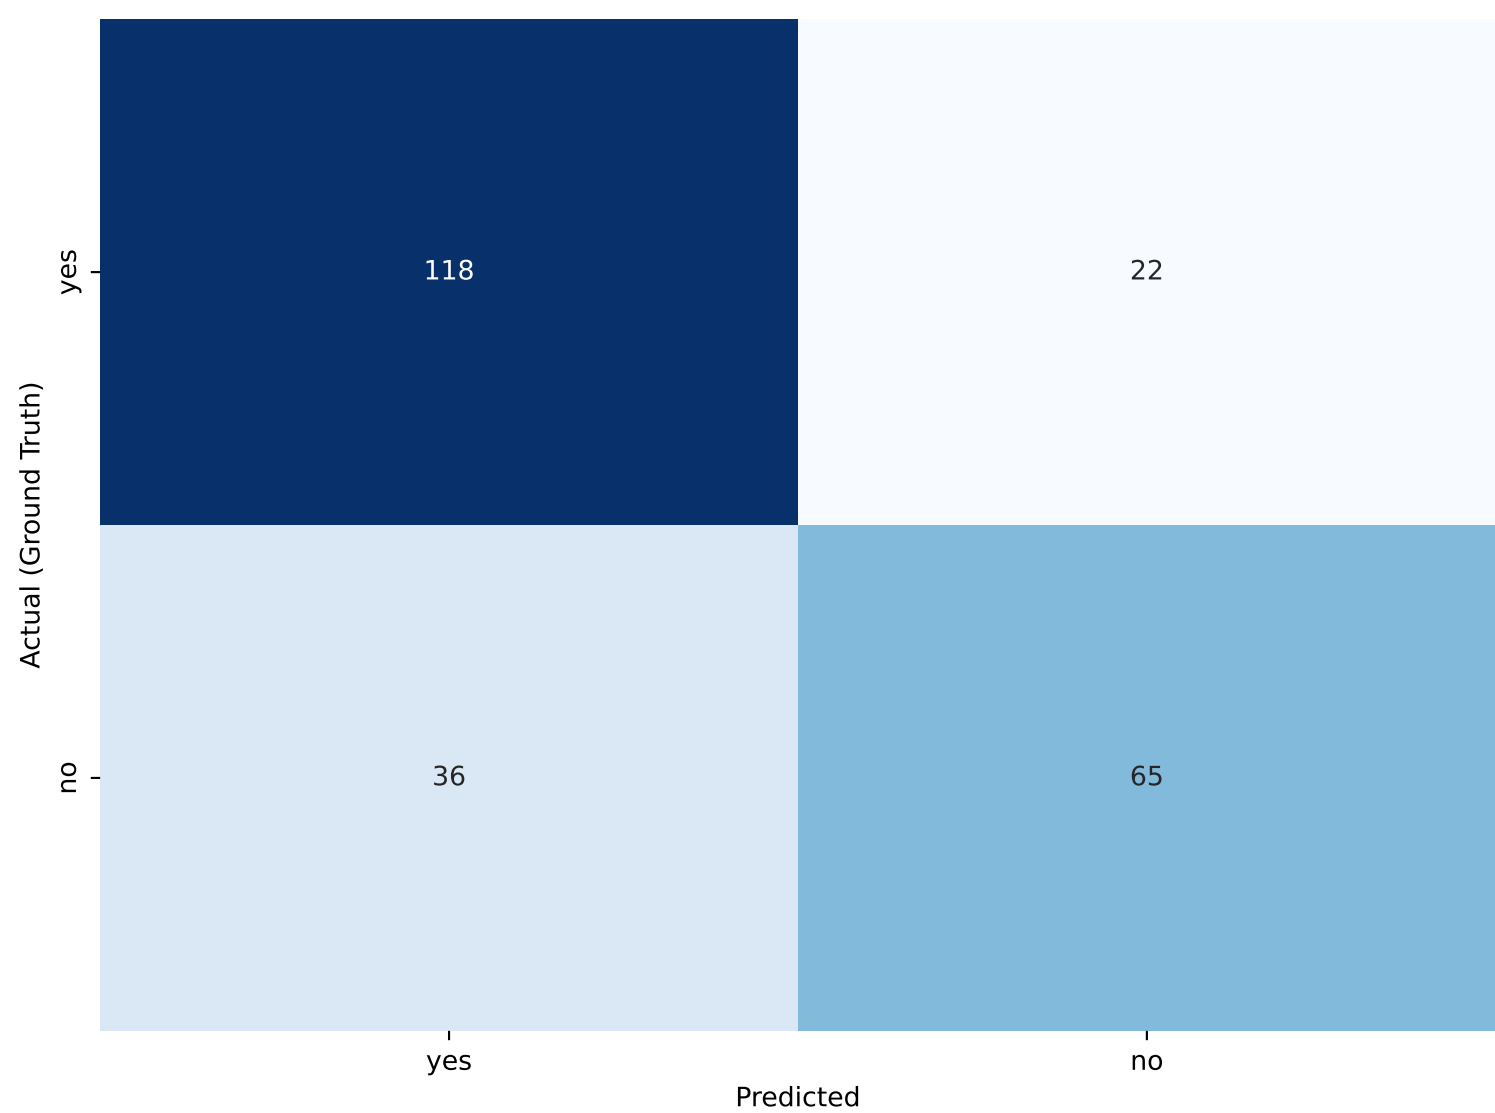

Supplement: supplementary_material [file cm_Qwen_Qwen2.5-Coder-32B-Instruct_obfuscated_COT.pdf › Supplementary Material/FindNICE Benchmark/visualizations/confusion_matrices/cm_Qwen_Qwen2.5-Coder-32B-Instruct_obfuscated_COT.pdf]

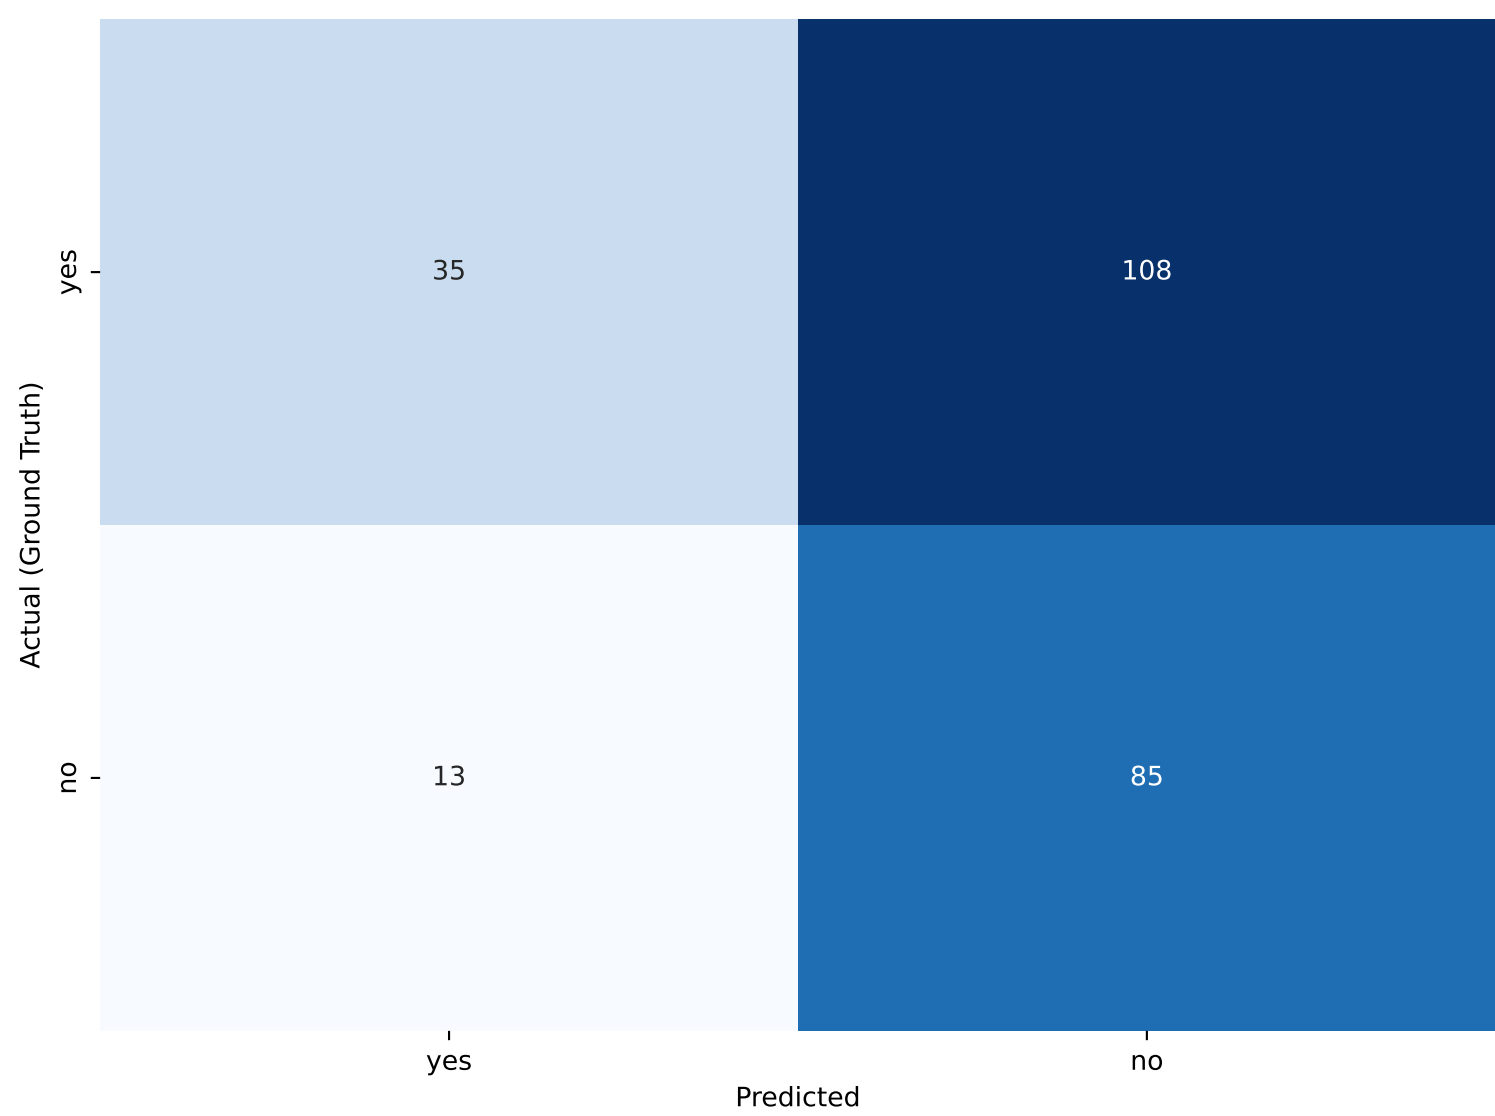

Supplement: supplementary_material [file cm_Qwen_Qwen2.5-Coder-32B-Instruct_obfuscated_ZS.pdf › Supplementary Material/FindNICE Benchmark/visualizations/confusion_matrices/cm_Qwen_Qwen2.5-Coder-32B-Instruct_obfuscated_ZS.pdf]

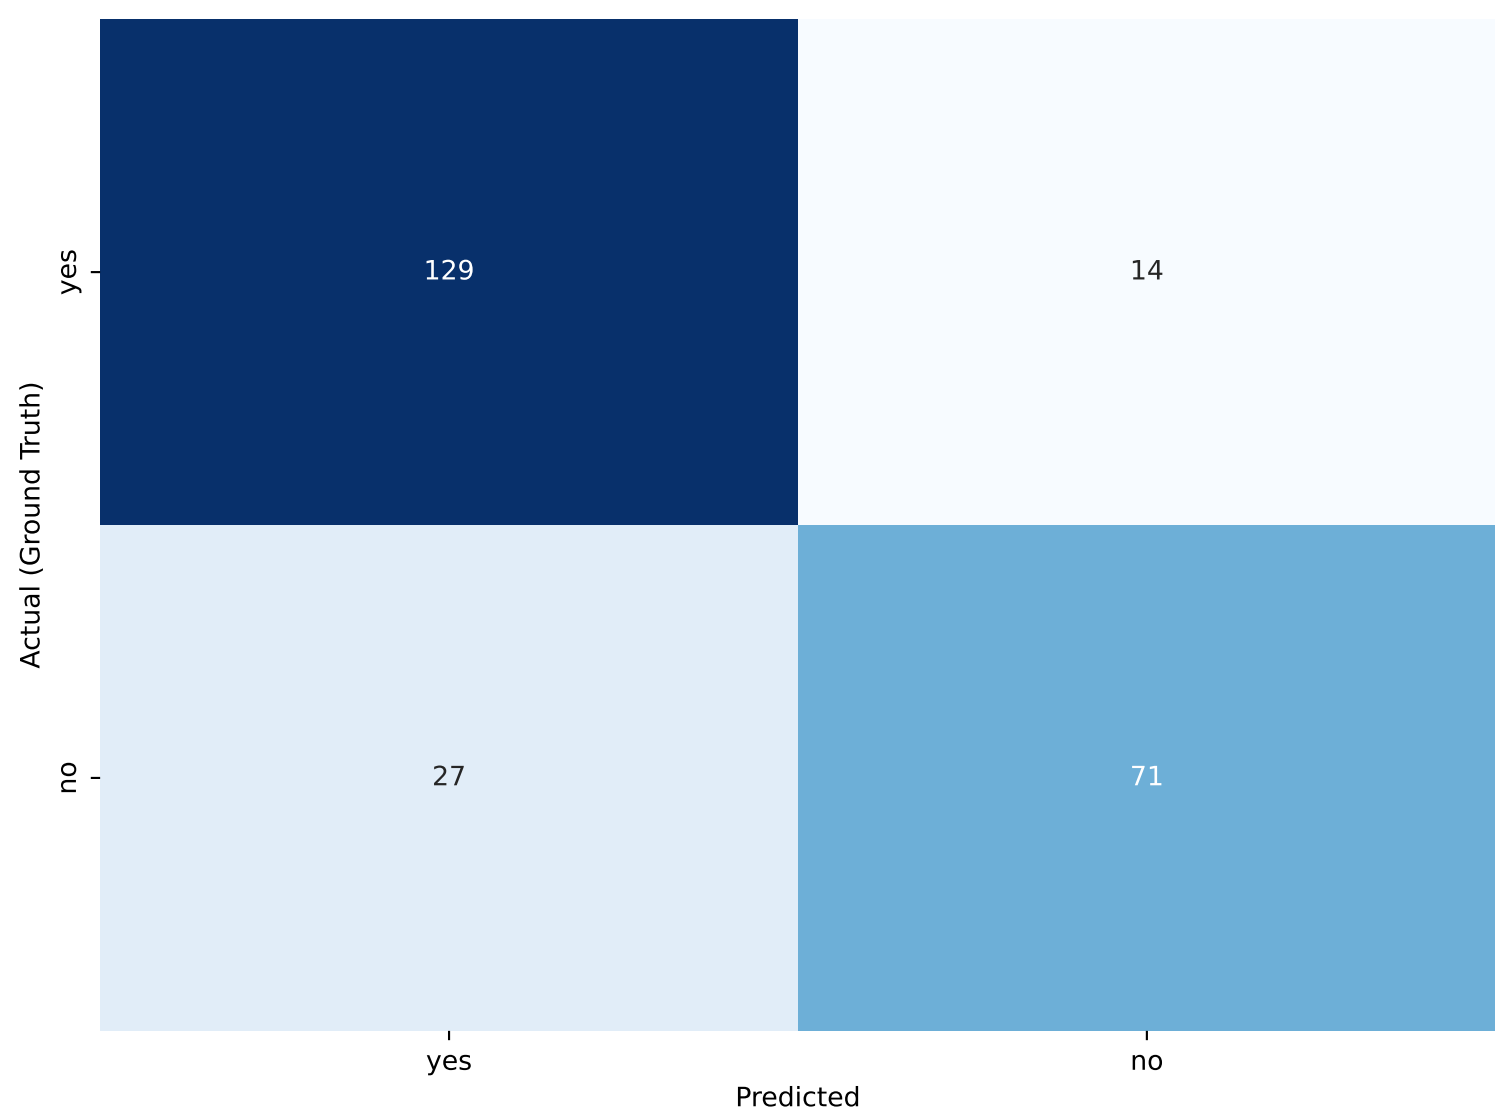

Supplement: supplementary_material [file cm_Qwen_Qwen2.5-Coder-32B-Instruct_unmasked_COT.pdf › Supplementary Material/FindNICE Benchmark/visualizations/confusion_matrices/cm_Qwen_Qwen2.5-Coder-32B-Instruct_unmasked_COT.pdf]

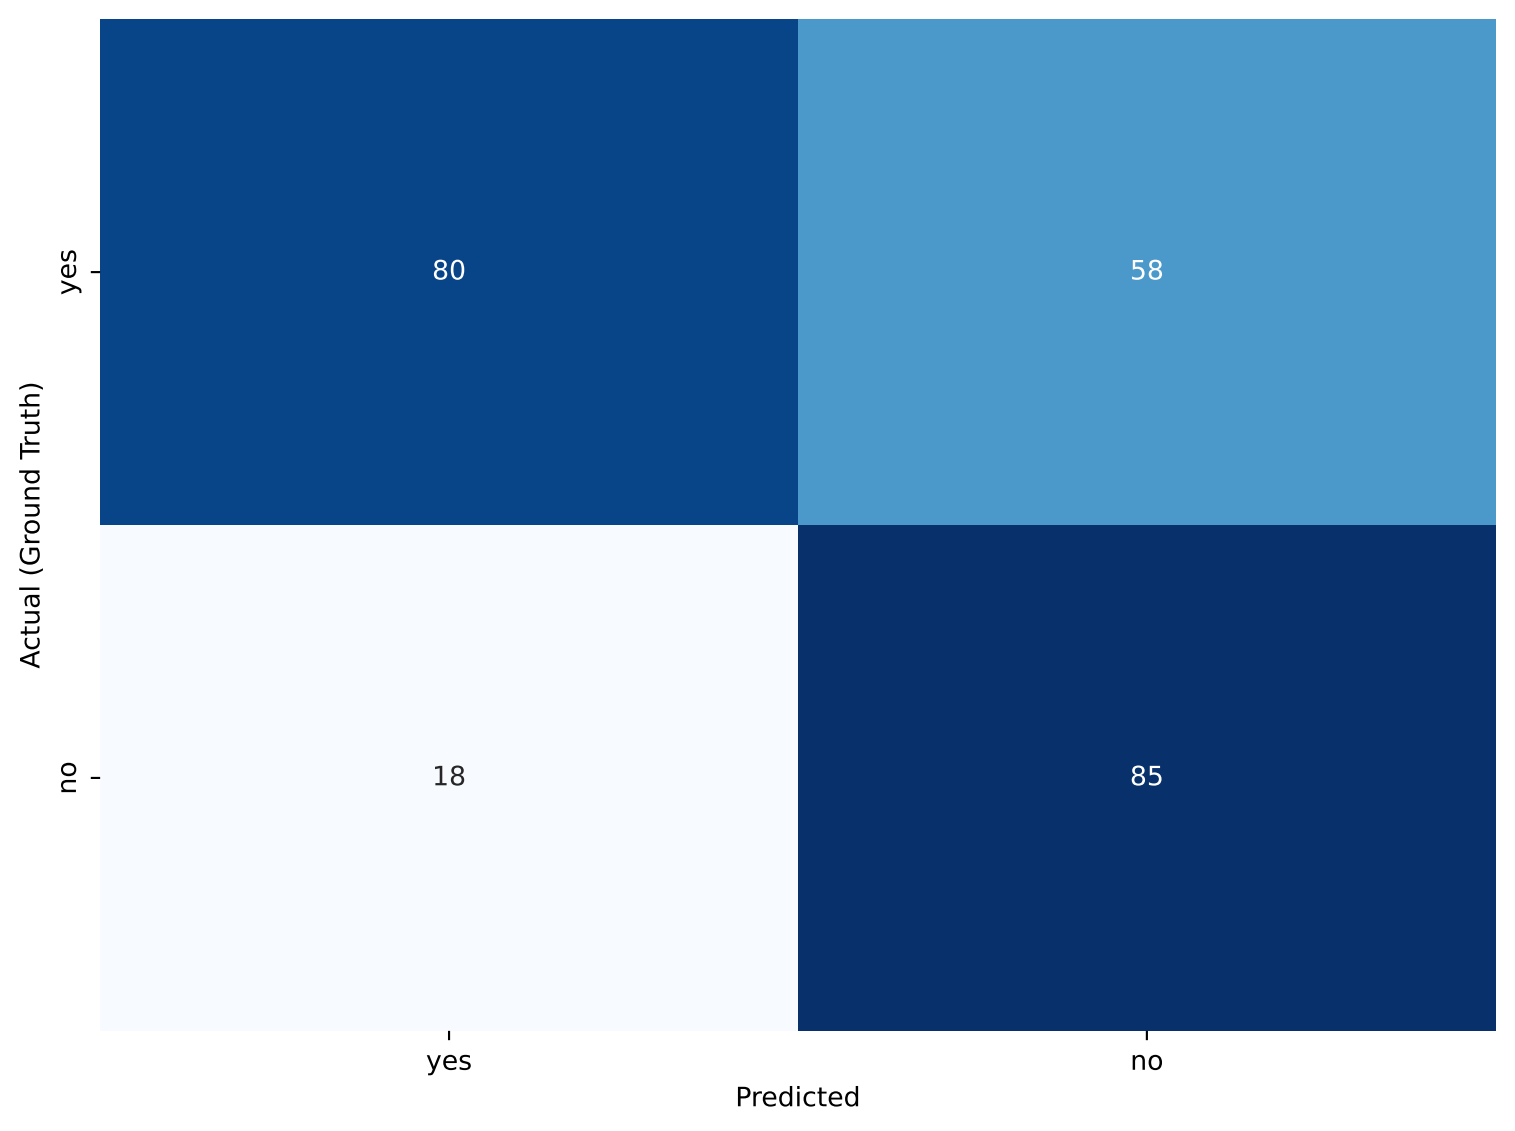

Supplement: supplementary_material [file cm_Qwen_Qwen2.5-Coder-32B-Instruct_unmasked_ZS.pdf › Supplementary Material/FindNICE Benchmark/visualizations/confusion_matrices/cm_Qwen_Qwen2.5-Coder-32B-Instruct_unmasked_ZS.pdf]

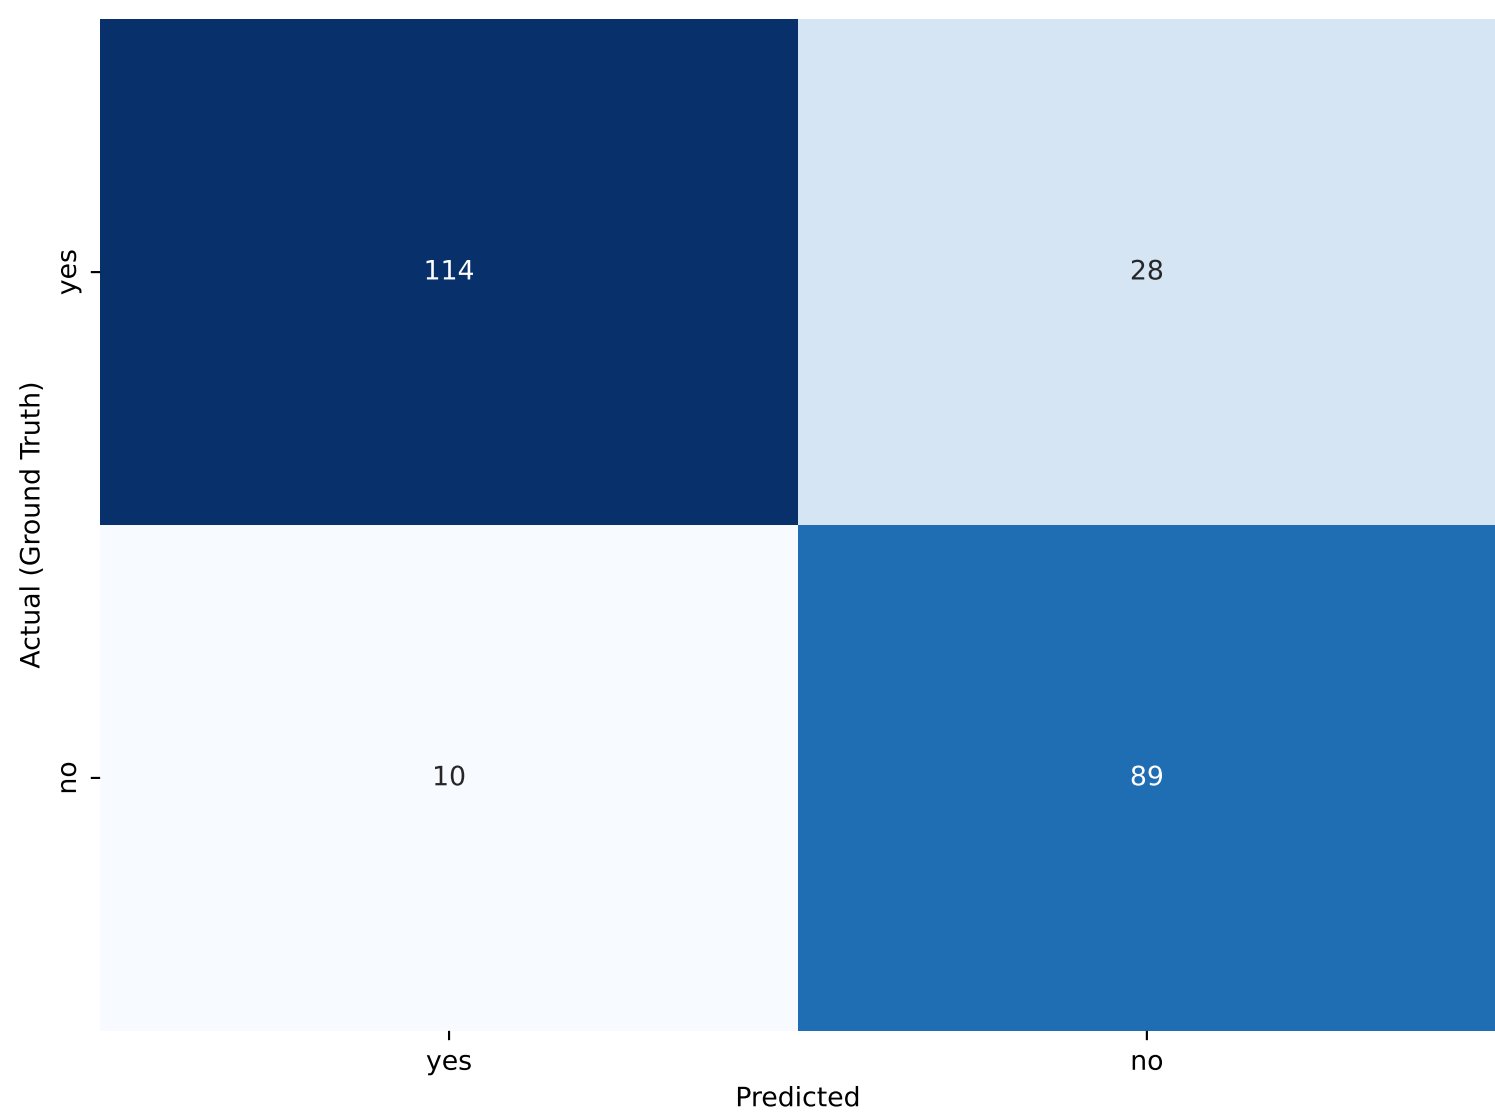

Supplement: supplementary_material [file cm_deepseek-ai_DeepSeek-R1_masked_ZS.pdf › Supplementary Material/FindNICE Benchmark/visualizations/confusion_matrices/cm_deepseek-ai_DeepSeek-R1_masked_ZS.pdf]

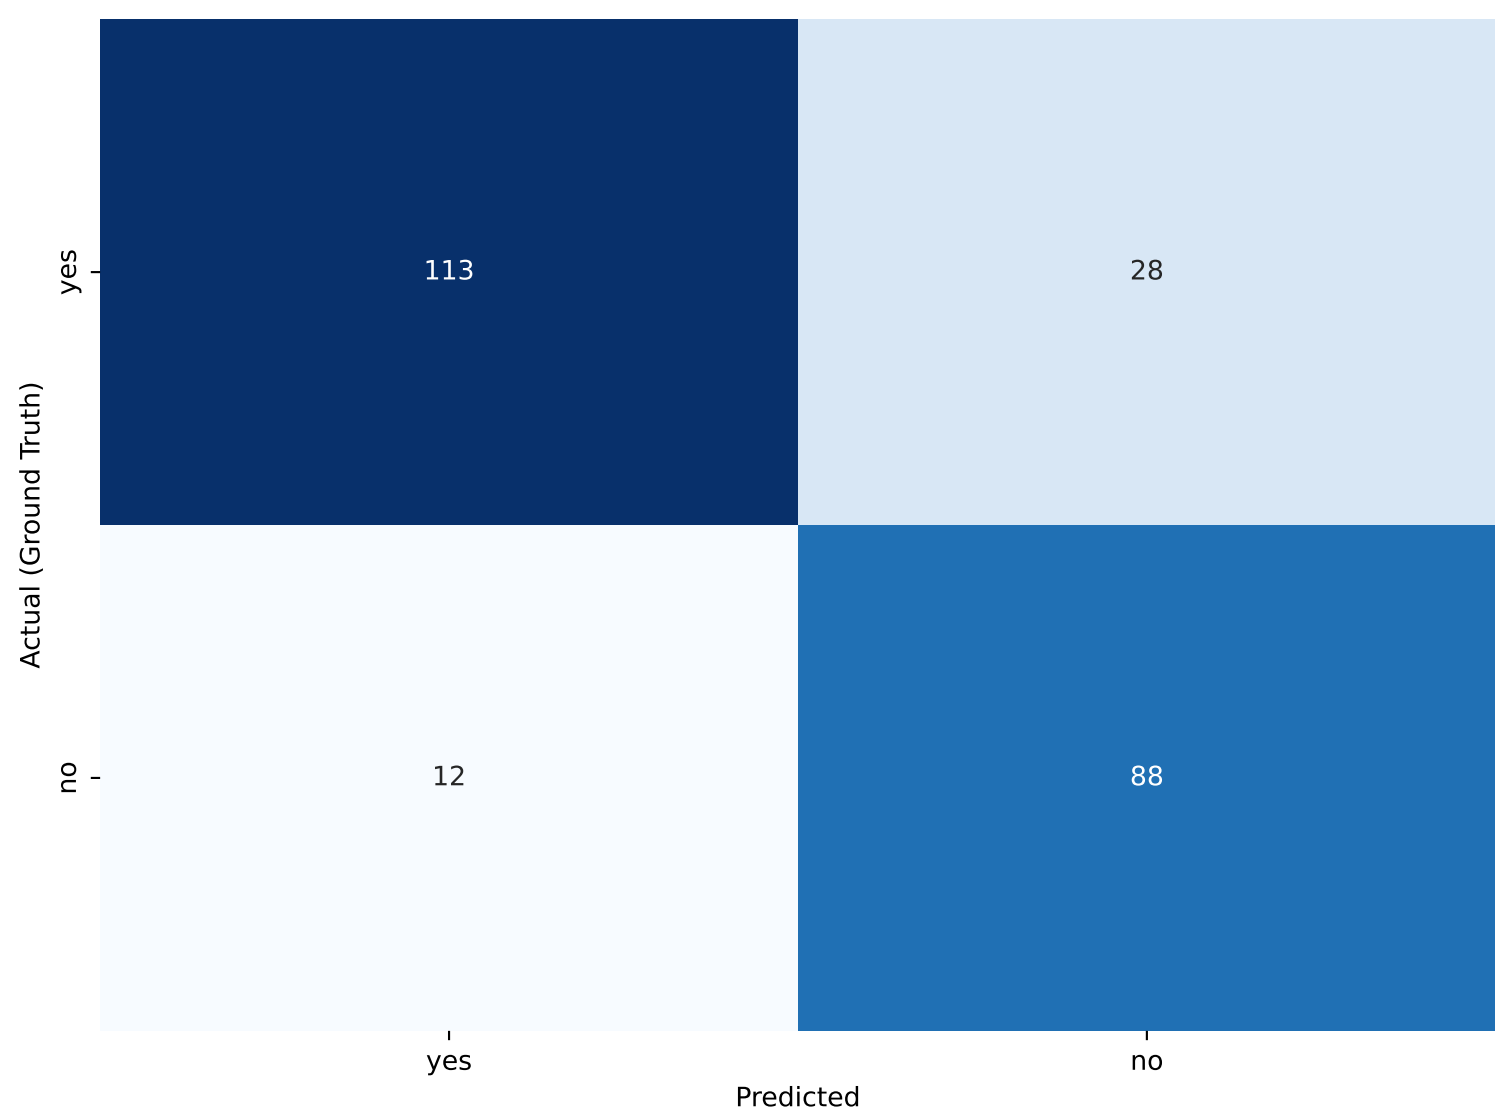

Supplement: supplementary_material [file cm_deepseek-ai_DeepSeek-R1_obfuscated_ZS.pdf › Supplementary Material/FindNICE Benchmark/visualizations/confusion_matrices/cm_deepseek-ai_DeepSeek-R1_obfuscated_ZS.pdf]

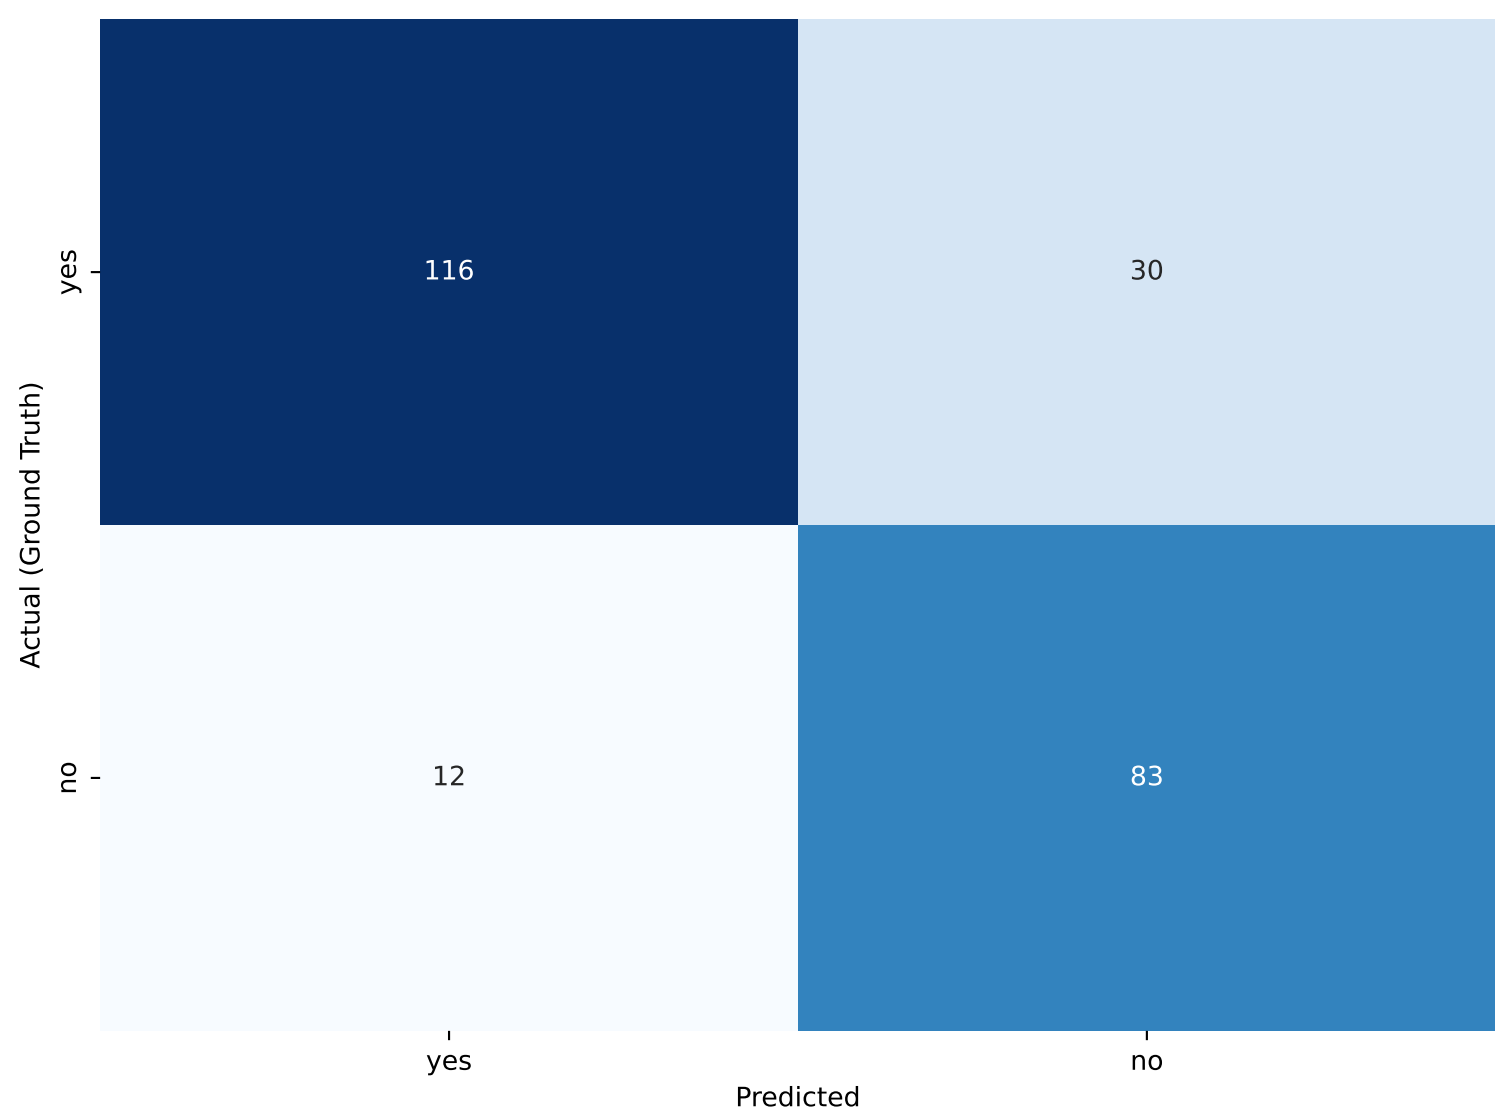

Supplement: supplementary_material [file cm_deepseek-ai_DeepSeek-R1_unmasked_ZS.pdf › Supplementary Material/FindNICE Benchmark/visualizations/confusion_matrices/cm_deepseek-ai_DeepSeek-R1_unmasked_ZS.pdf]

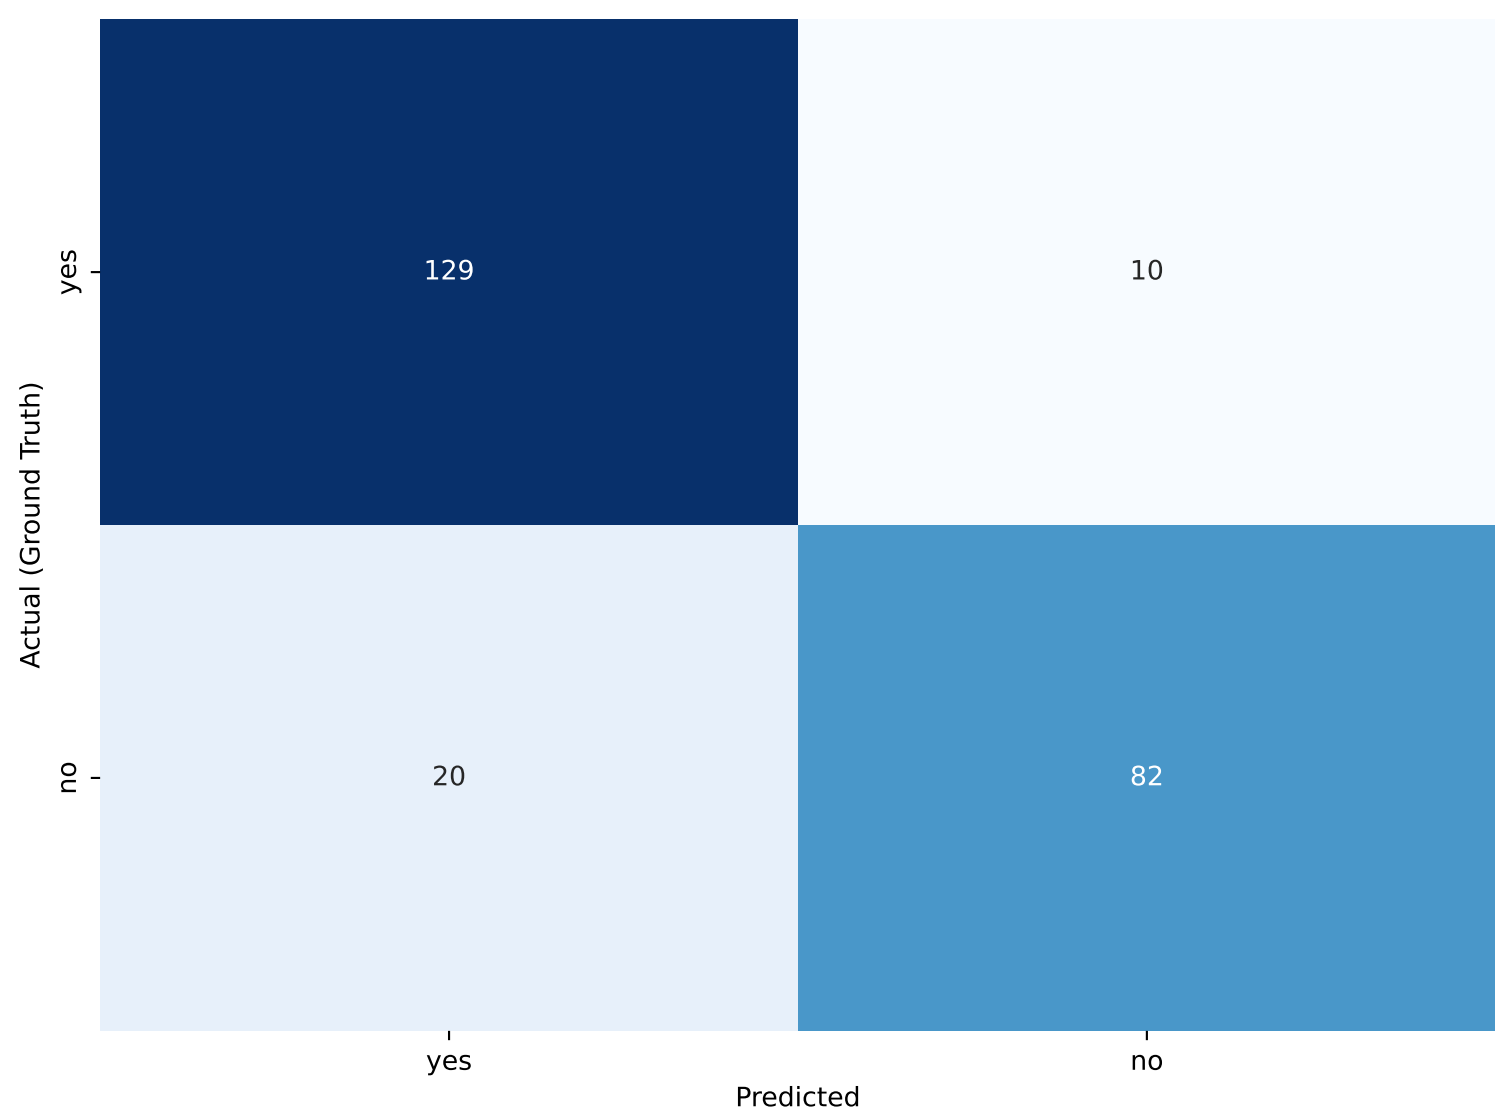

Supplement: supplementary_material [file cm_deepseek-ai_DeepSeek-V3-0324_masked_COT.pdf › Supplementary Material/FindNICE Benchmark/visualizations/confusion_matrices/cm_deepseek-ai_DeepSeek-V3-0324_masked_COT.pdf]

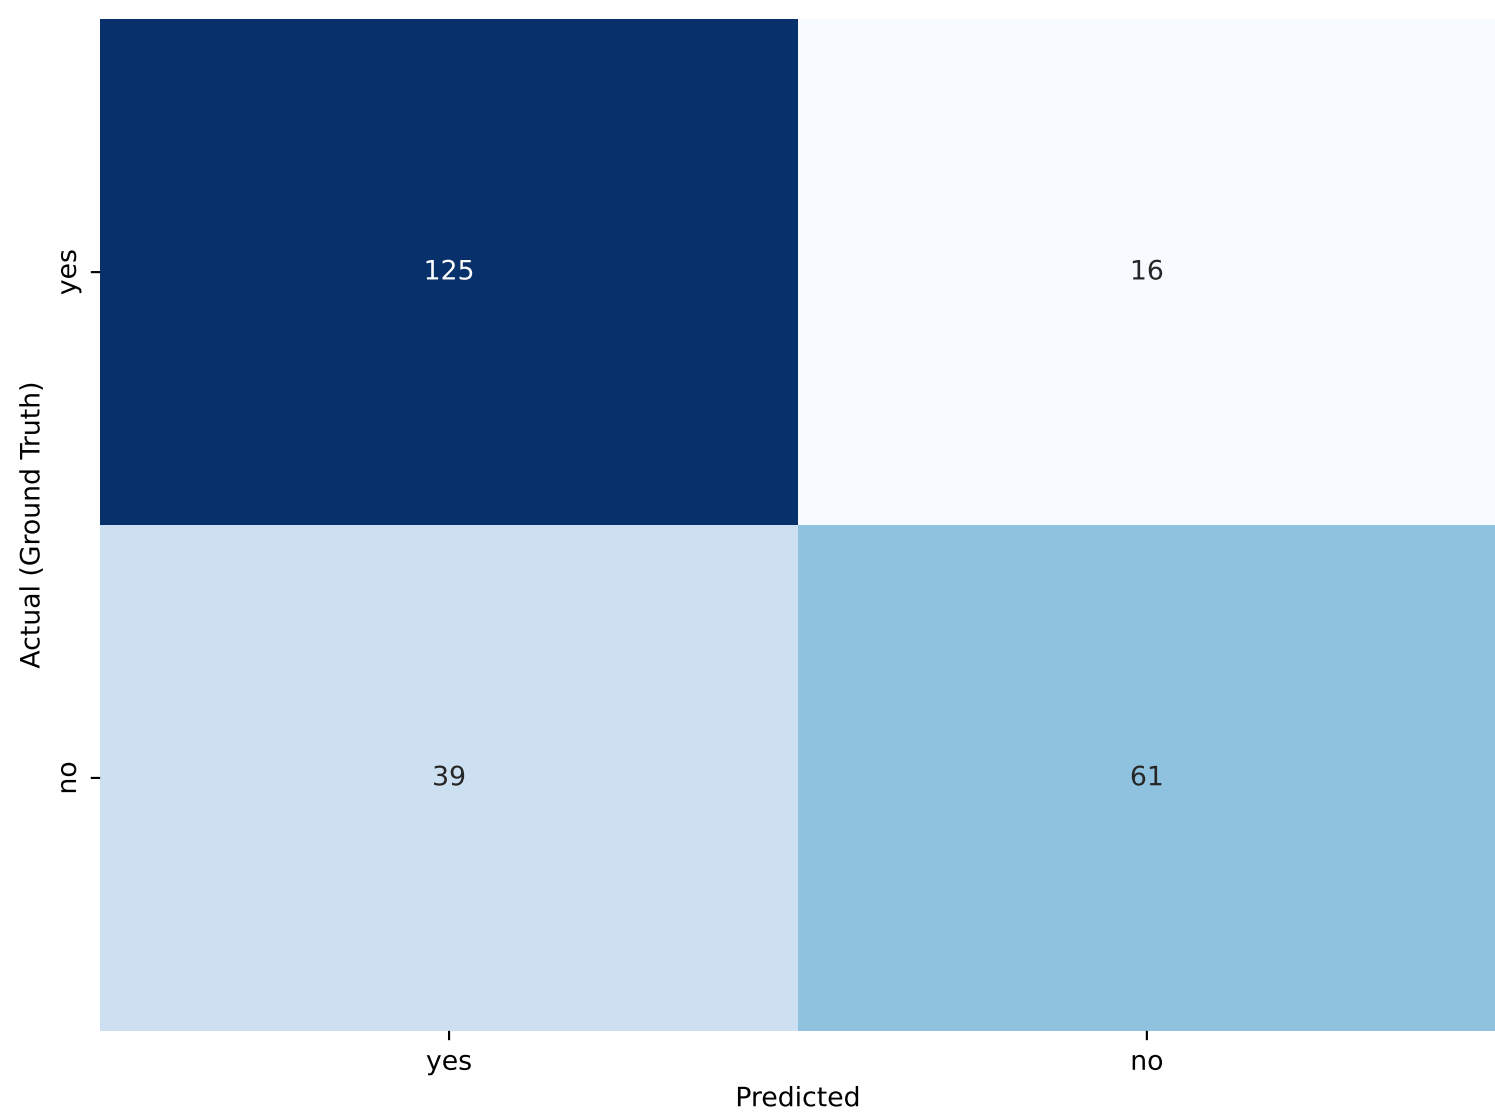

Supplement: supplementary_material [file cm_deepseek-ai_DeepSeek-V3-0324_masked_ZS.pdf › Supplementary Material/FindNICE Benchmark/visualizations/confusion_matrices/cm_deepseek-ai_DeepSeek-V3-0324_masked_ZS.pdf]

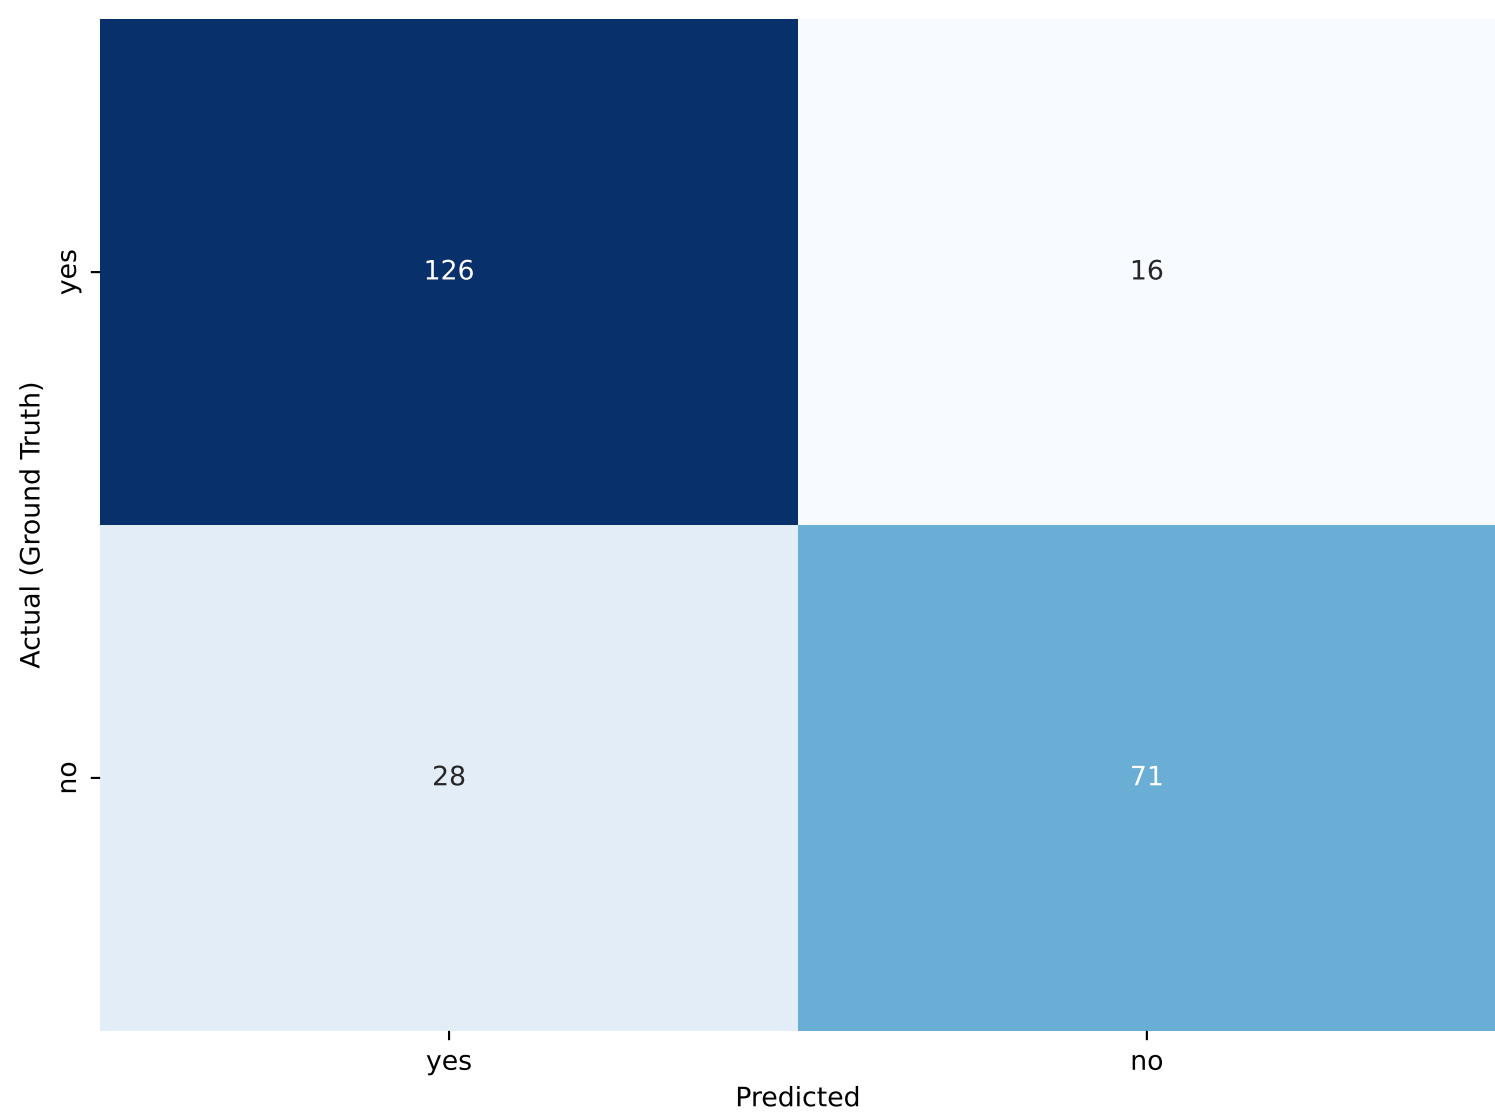

Supplement: supplementary_material [file cm_deepseek-ai_DeepSeek-V3-0324_obfuscated_COT.pdf › Supplementary Material/FindNICE Benchmark/visualizations/confusion_matrices/cm_deepseek-ai_DeepSeek-V3-0324_obfuscated_COT.pdf]

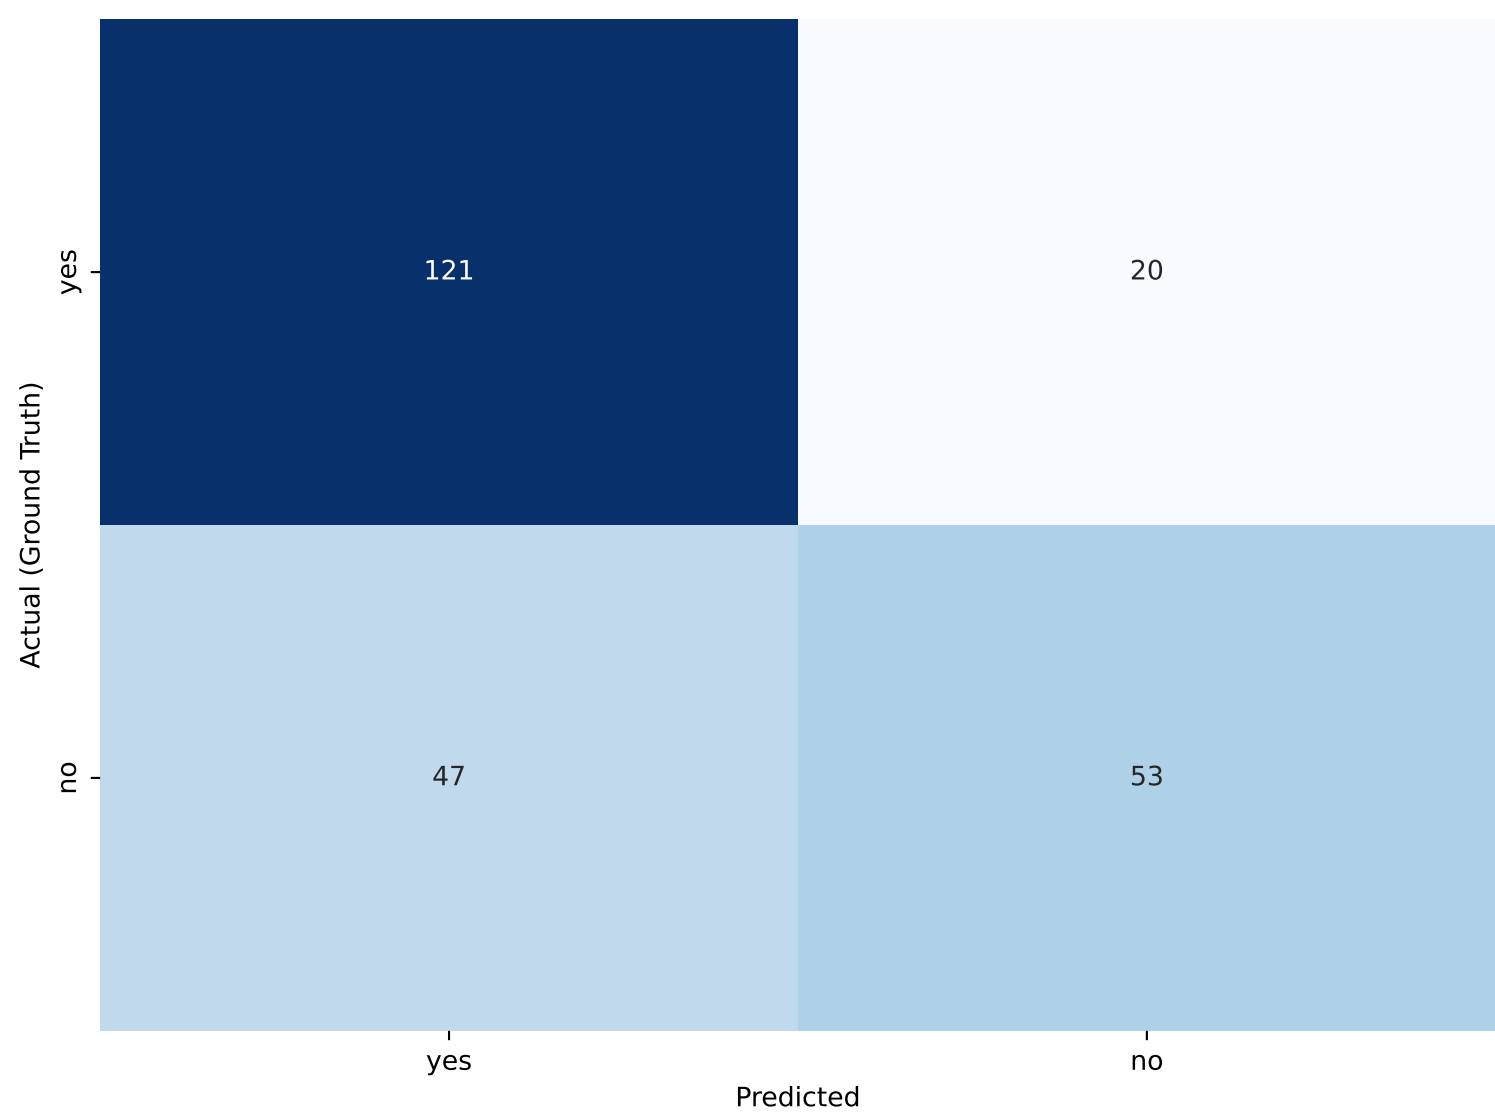

Supplement: supplementary_material [file cm_deepseek-ai_DeepSeek-V3-0324_obfuscated_ZS.pdf › Supplementary Material/FindNICE Benchmark/visualizations/confusion_matrices/cm_deepseek-ai_DeepSeek-V3-0324_obfuscated_ZS.pdf]

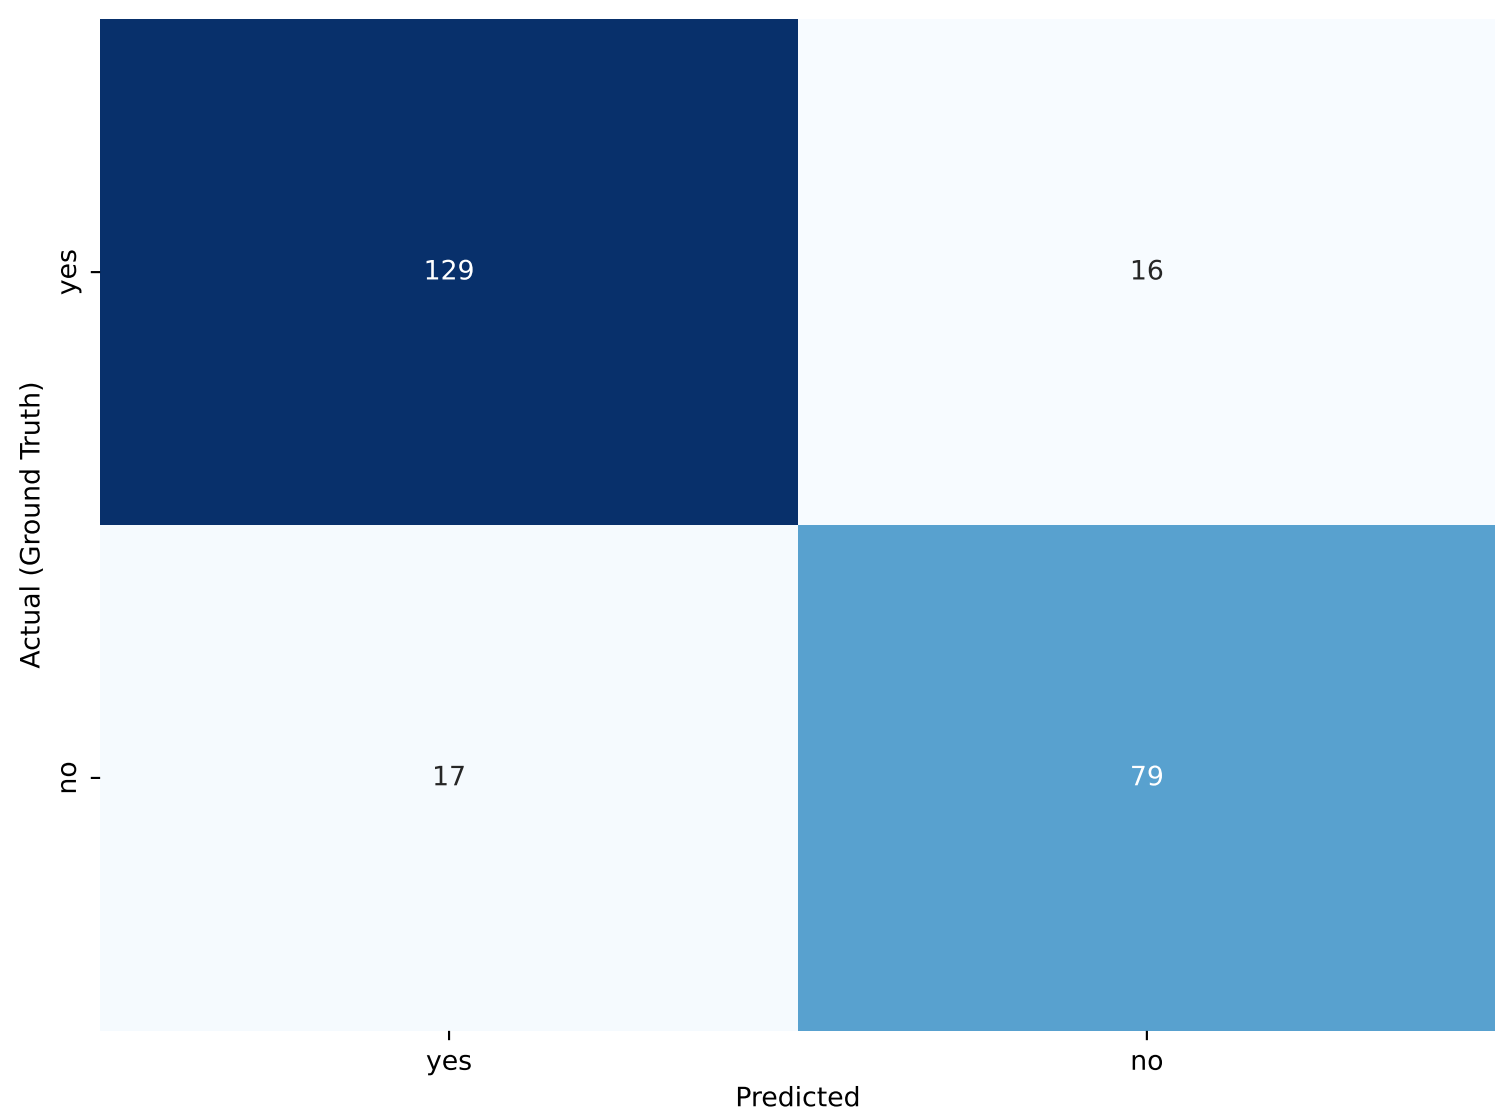

Supplement: supplementary_material [file cm_deepseek-ai_DeepSeek-V3-0324_unmasked_COT.pdf › Supplementary Material/FindNICE Benchmark/visualizations/confusion_matrices/cm_deepseek-ai_DeepSeek-V3-0324_unmasked_COT.pdf]

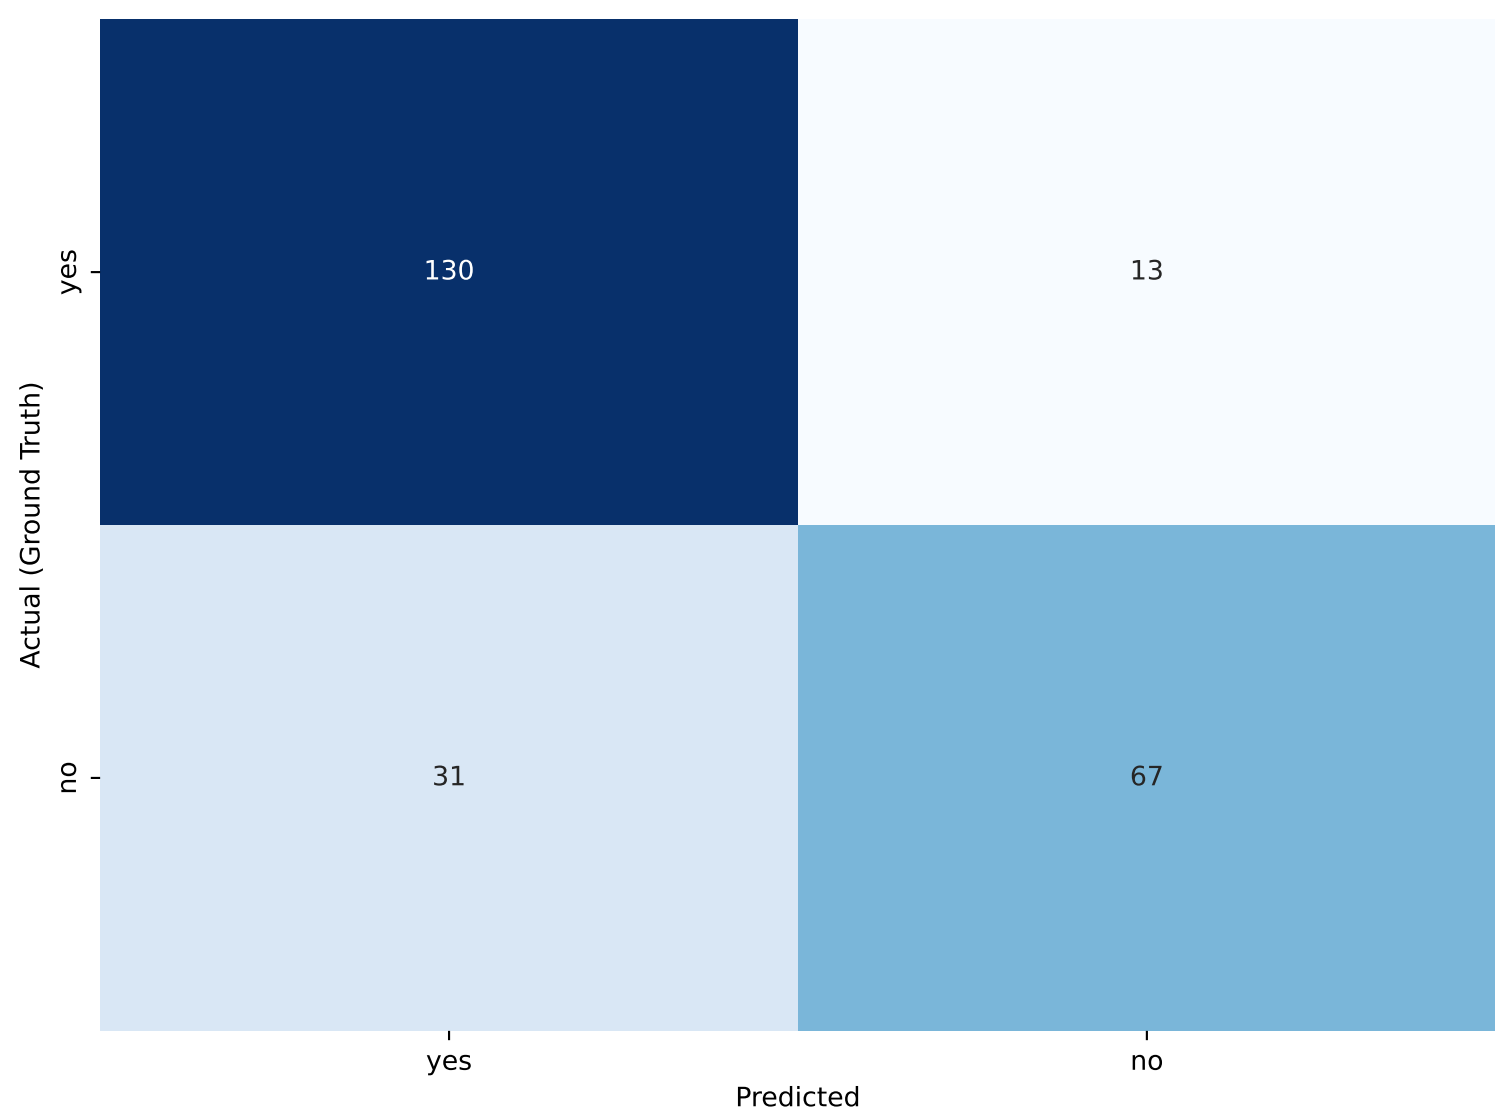

Supplement: supplementary_material [file cm_deepseek-ai_DeepSeek-V3-0324_unmasked_ZS.pdf › Supplementary Material/FindNICE Benchmark/visualizations/confusion_matrices/cm_deepseek-ai_DeepSeek-V3-0324_unmasked_ZS.pdf]

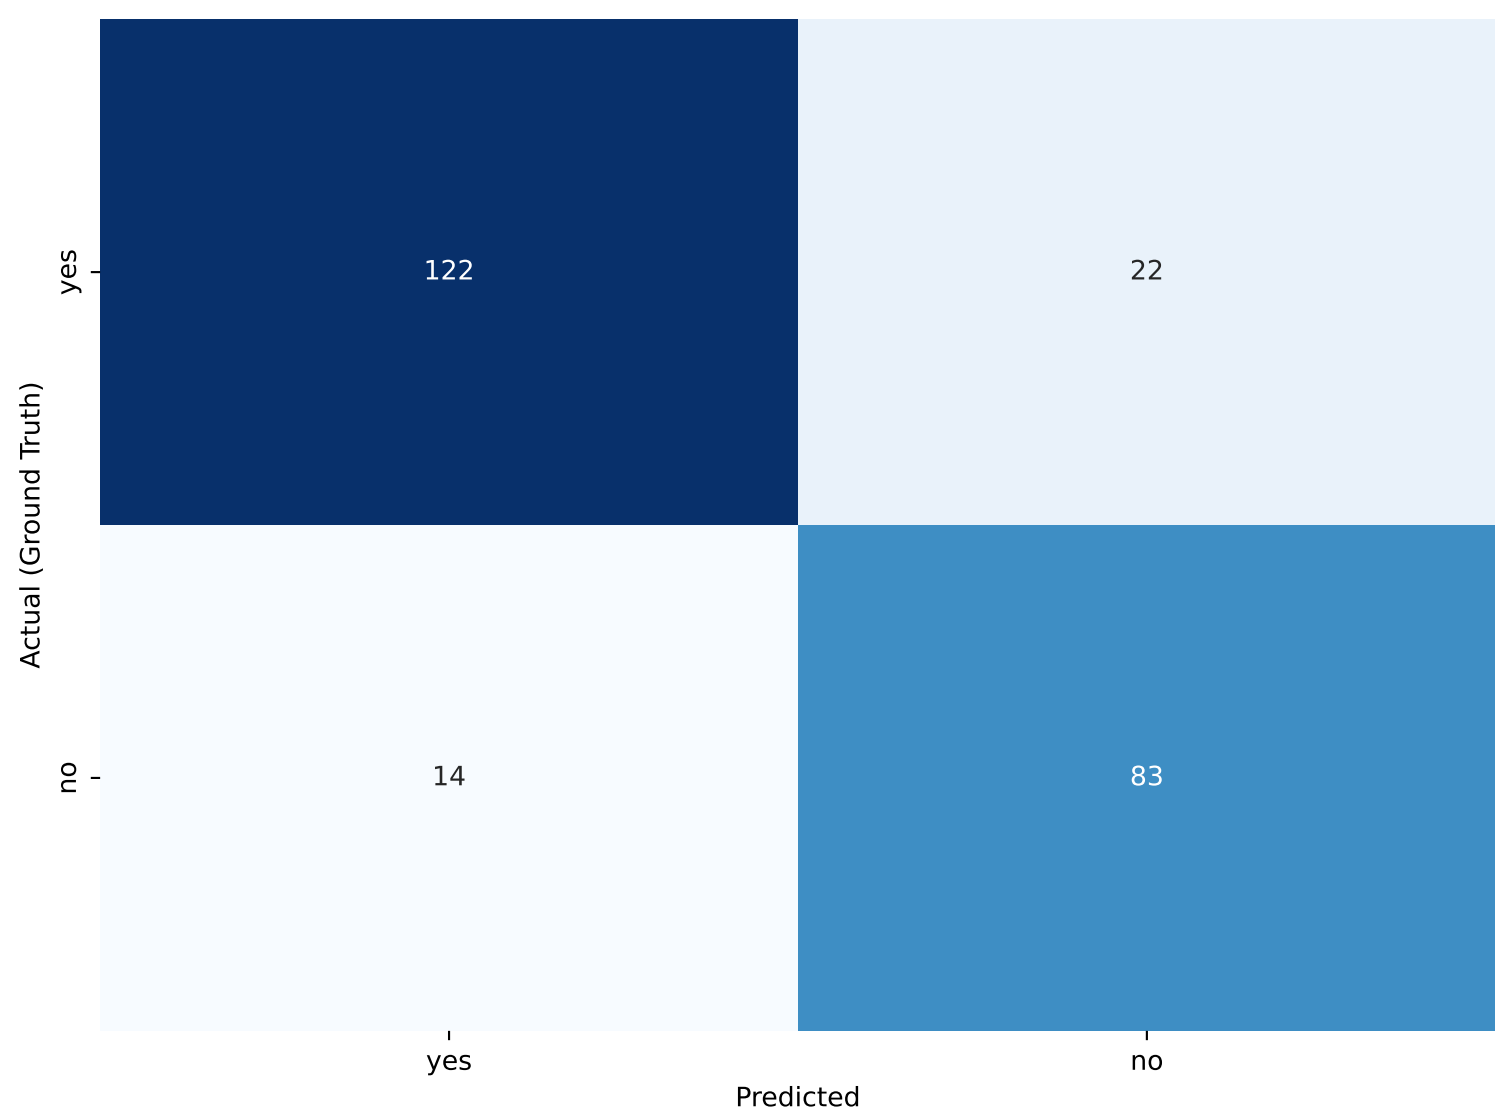

Supplement: supplementary_material [file cm_gpt-4.1-2025-04-14_masked_COT.pdf › Supplementary Material/FindNICE Benchmark/visualizations/confusion_matrices/cm_gpt-4.1-2025-04-14_masked_COT.pdf]

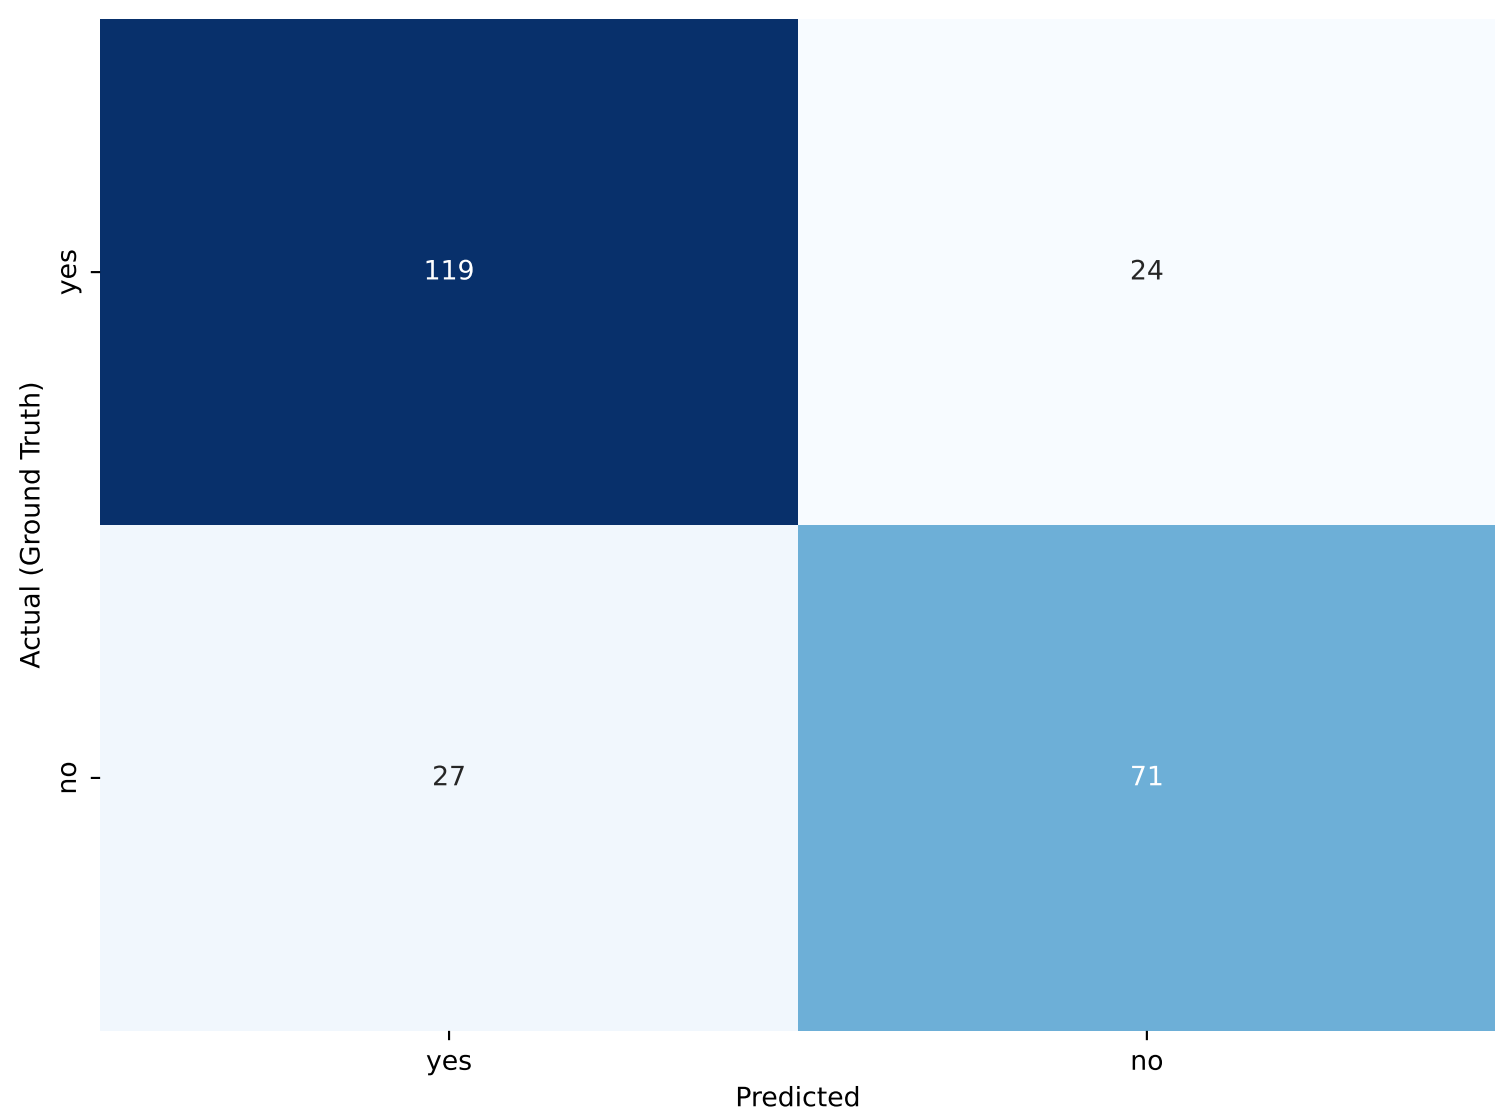

Supplement: supplementary_material [file cm_gpt-4.1-2025-04-14_masked_ZS.pdf › Supplementary Material/FindNICE Benchmark/visualizations/confusion_matrices/cm_gpt-4.1-2025-04-14_masked_ZS.pdf]

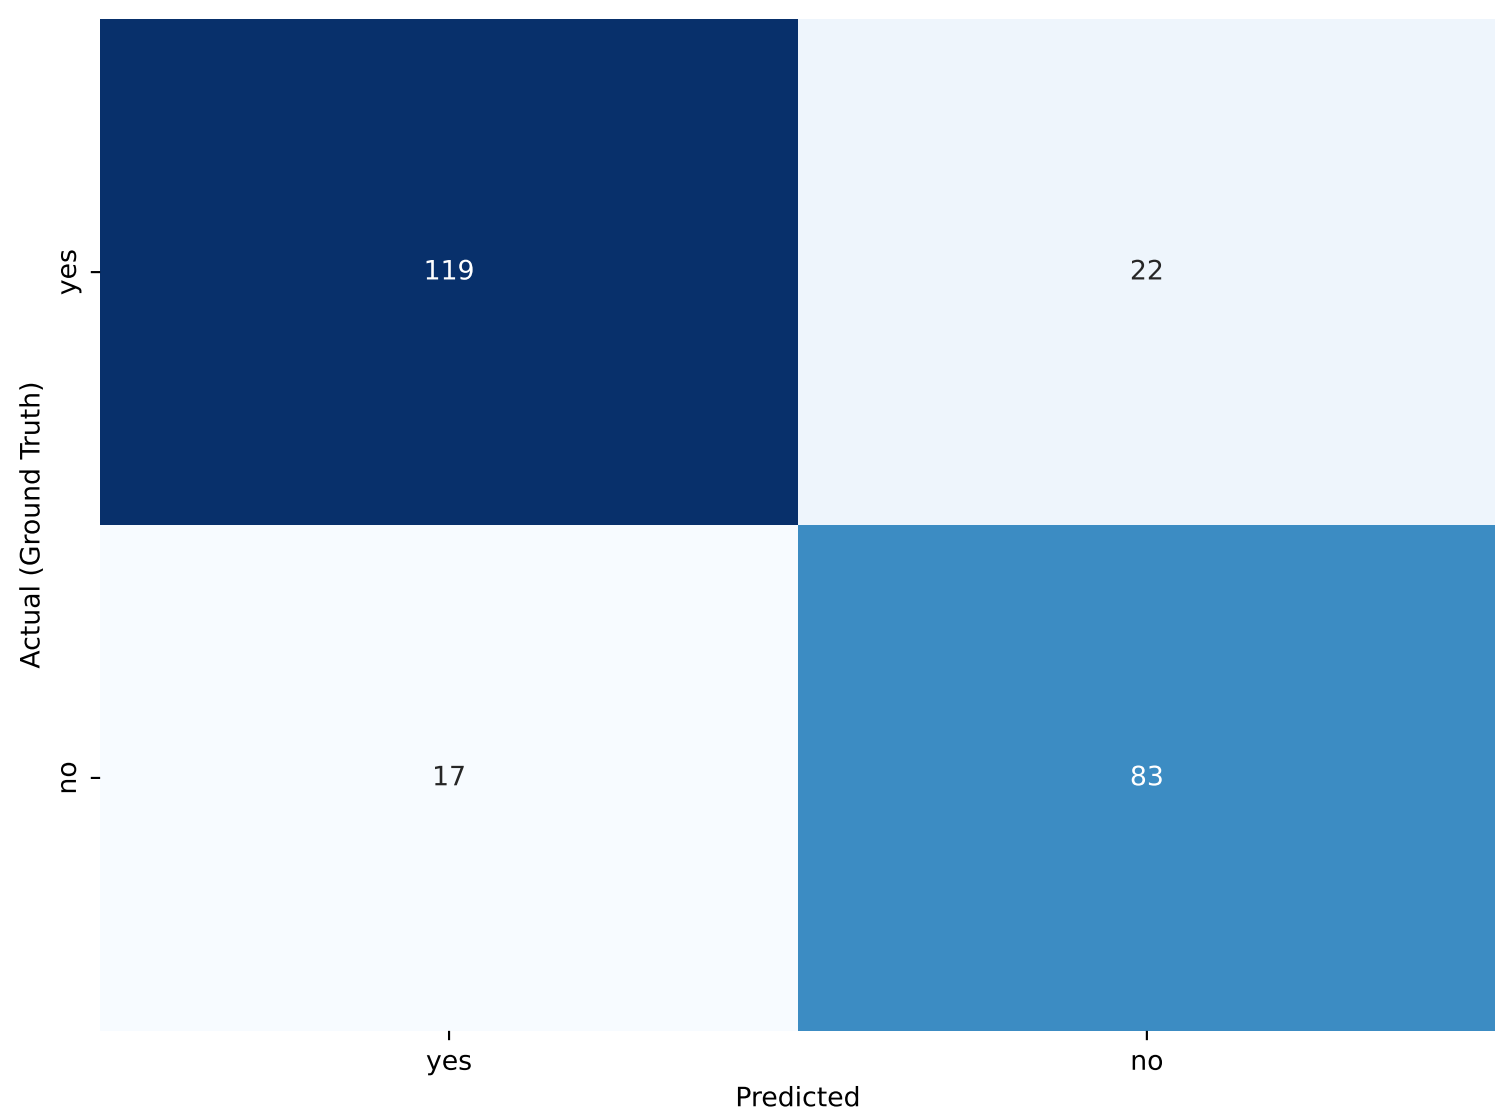

Supplement: supplementary_material [file cm_gpt-4.1-2025-04-14_obfuscated_COT.pdf › Supplementary Material/FindNICE Benchmark/visualizations/confusion_matrices/cm_gpt-4.1-2025-04-14_obfuscated_COT.pdf]

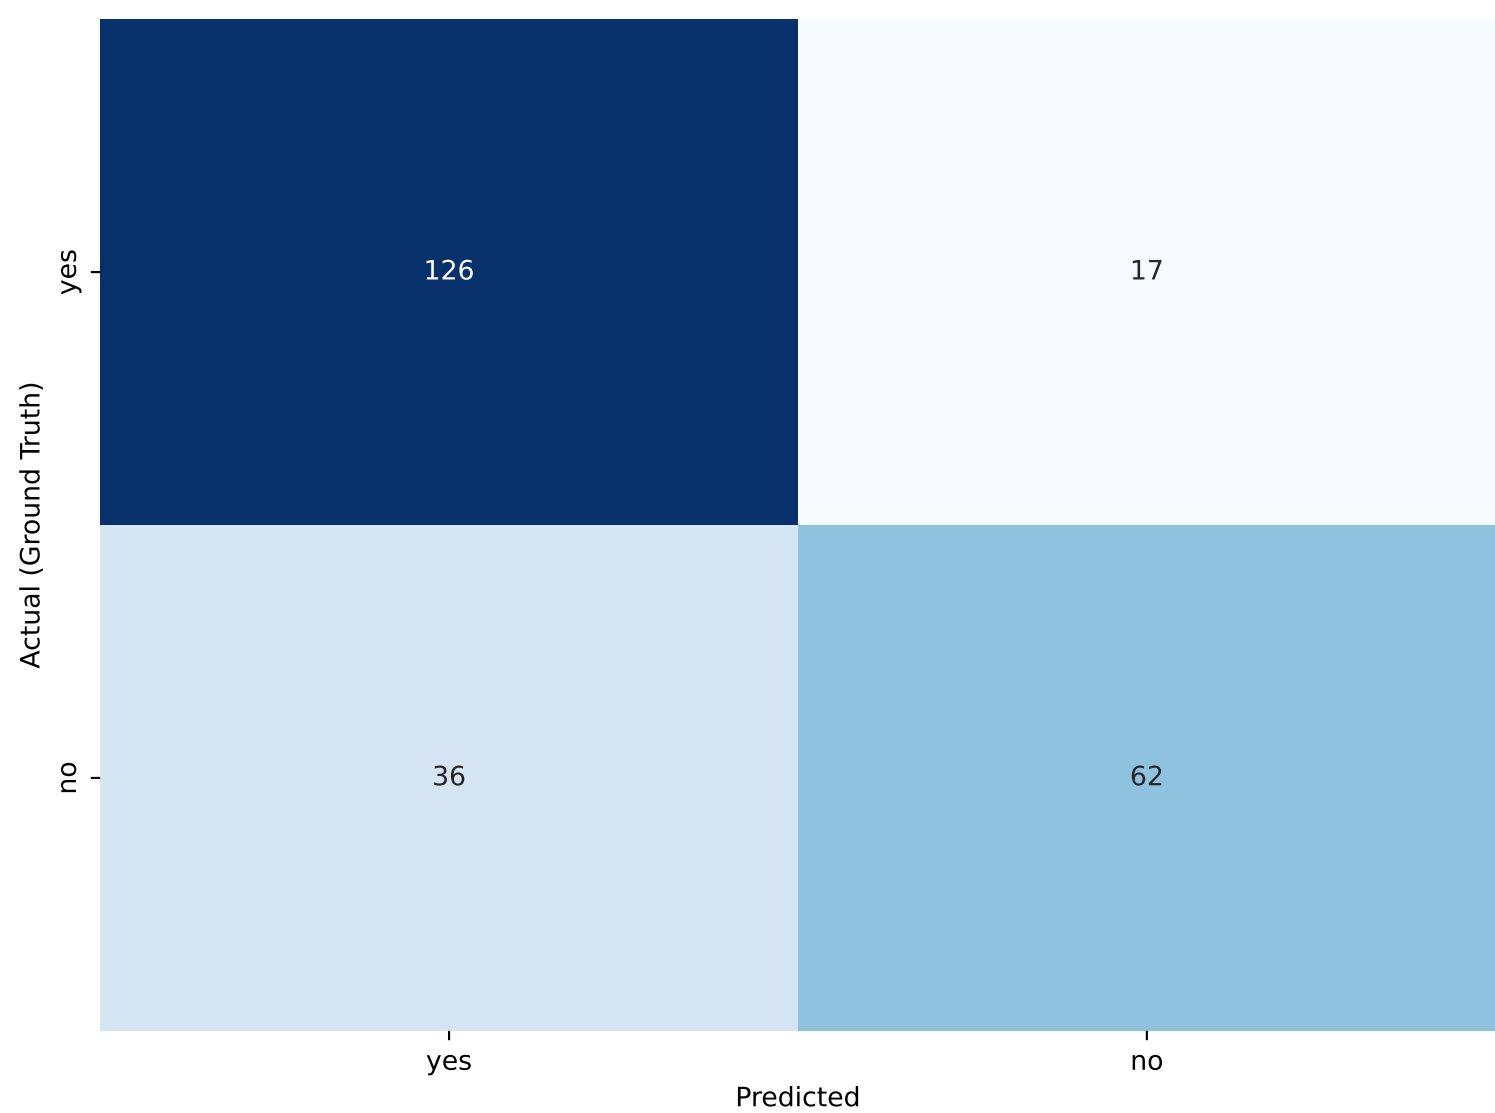

Supplement: supplementary_material [file cm_gpt-4.1-2025-04-14_obfuscated_ZS.pdf › Supplementary Material/FindNICE Benchmark/visualizations/confusion_matrices/cm_gpt-4.1-2025-04-14_obfuscated_ZS.pdf]

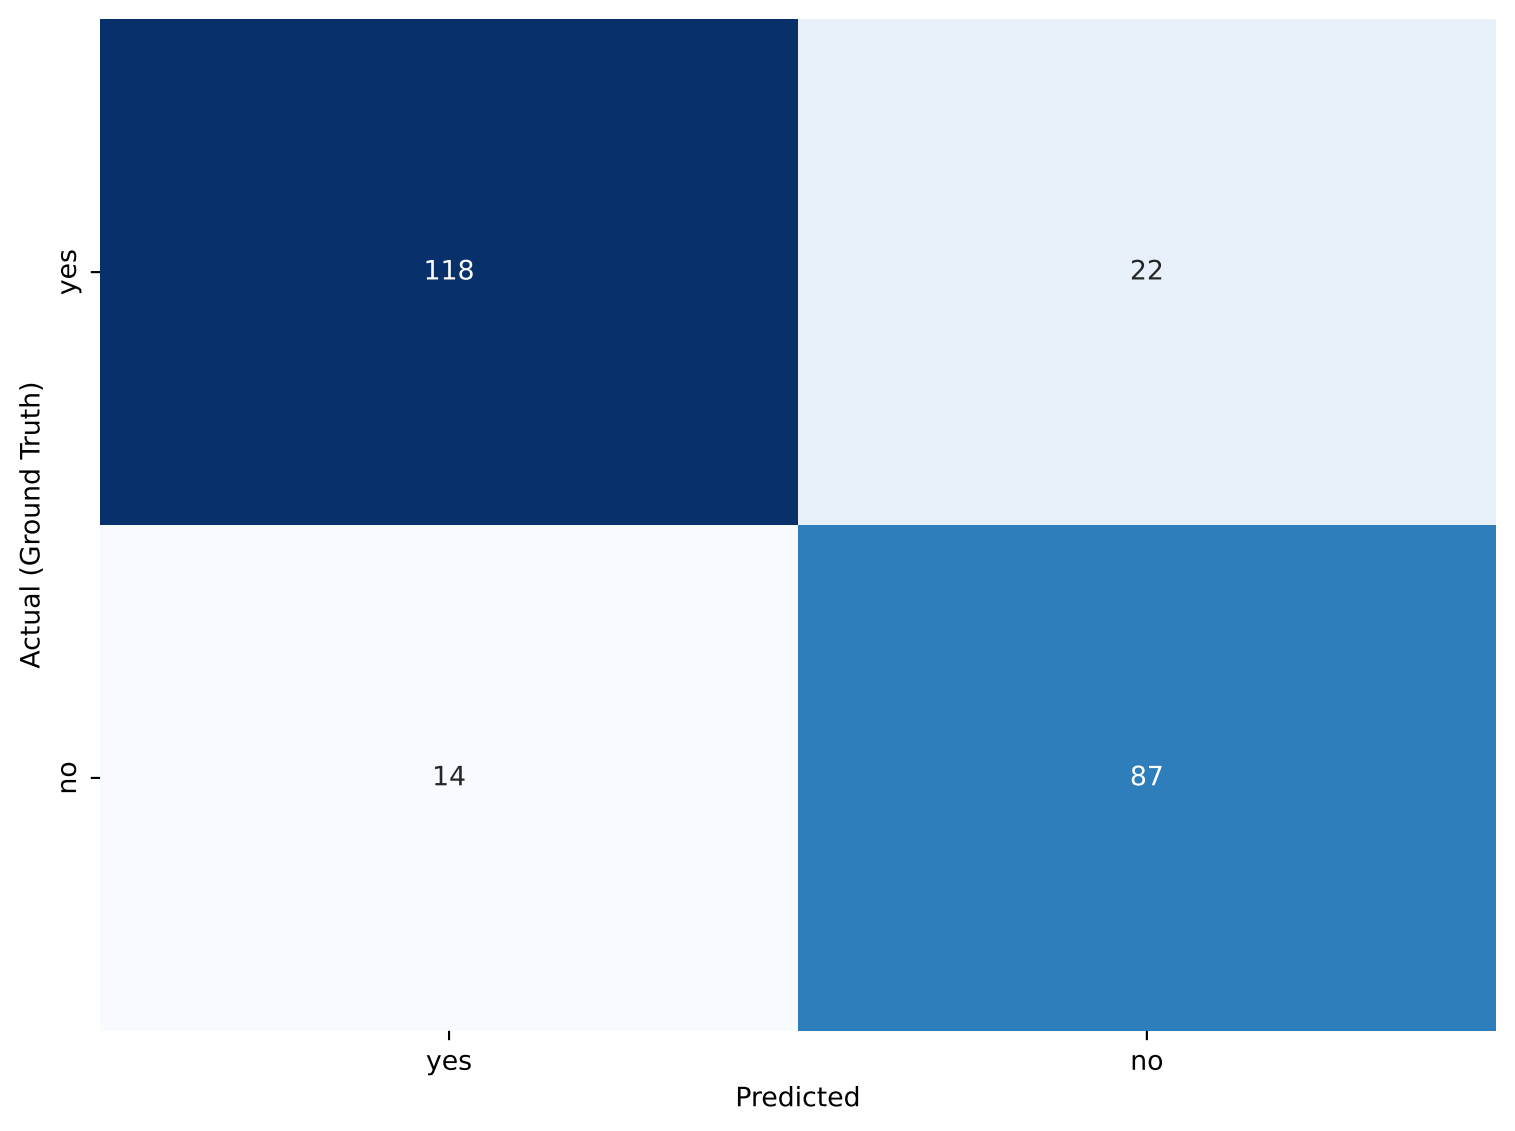

Supplement: supplementary_material [file cm_gpt-4.1-2025-04-14_unmasked_COT.pdf › Supplementary Material/FindNICE Benchmark/visualizations/confusion_matrices/cm_gpt-4.1-2025-04-14_unmasked_COT.pdf]

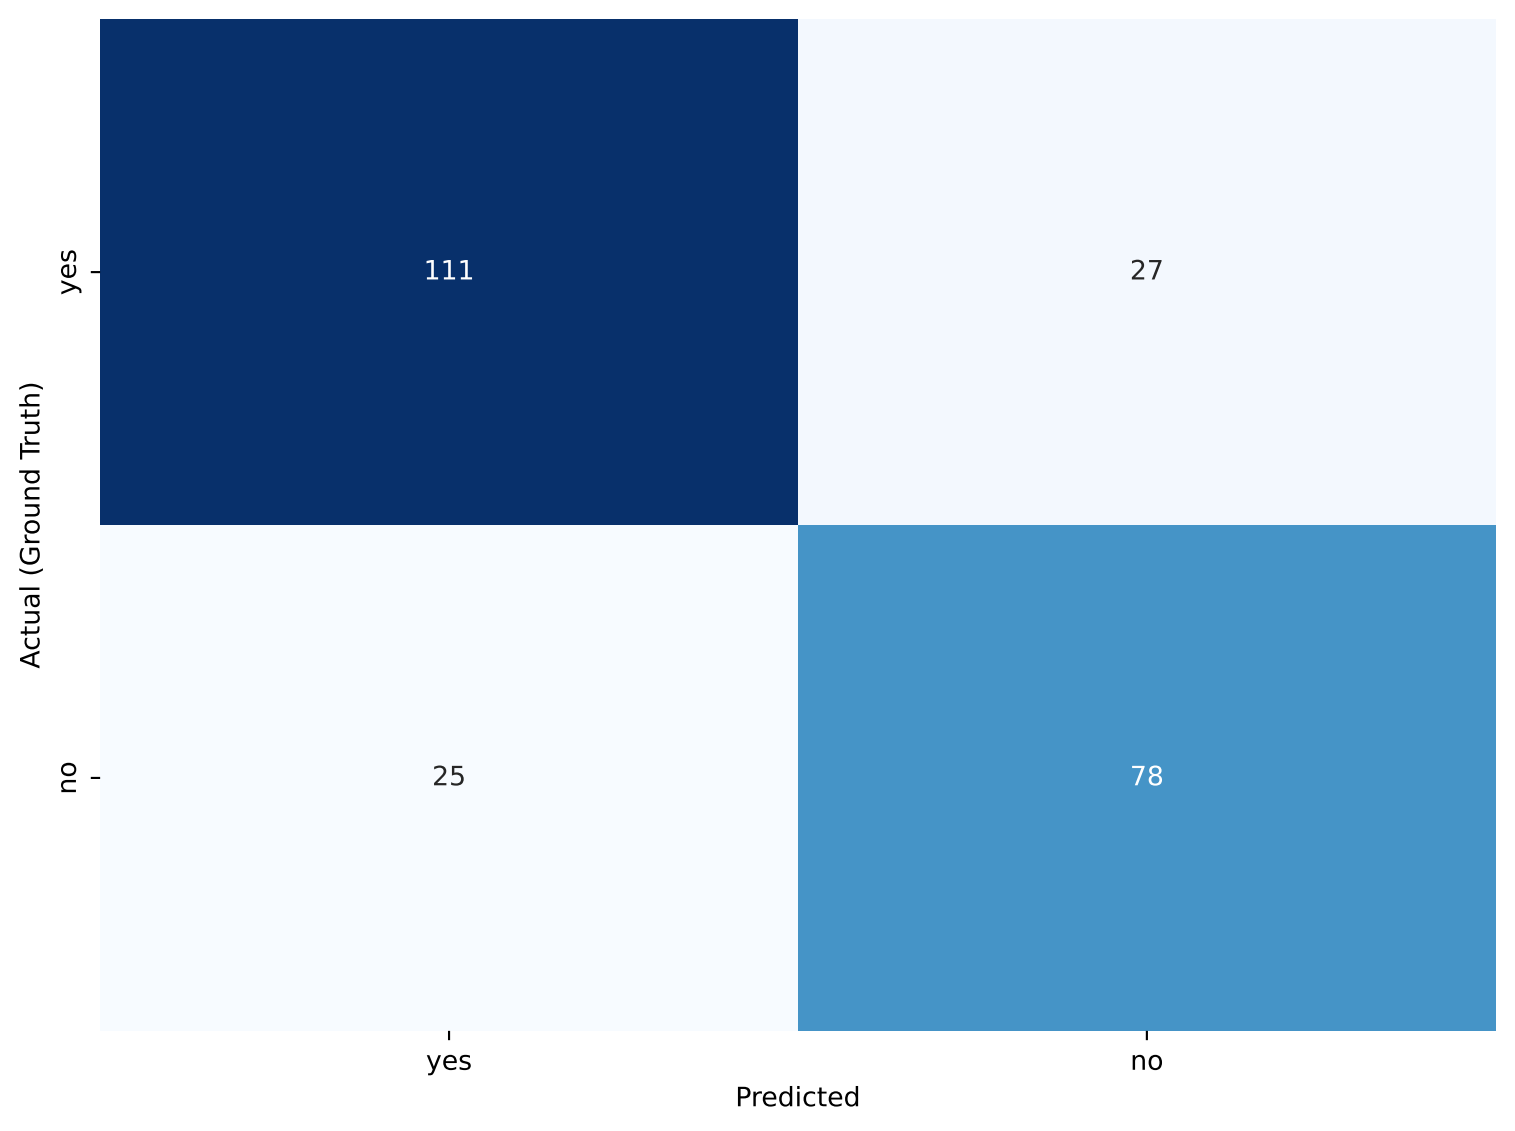

Supplement: supplementary_material [file cm_gpt-4.1-2025-04-14_unmasked_ZS.pdf › Supplementary Material/FindNICE Benchmark/visualizations/confusion_matrices/cm_gpt-4.1-2025-04-14_unmasked_ZS.pdf]

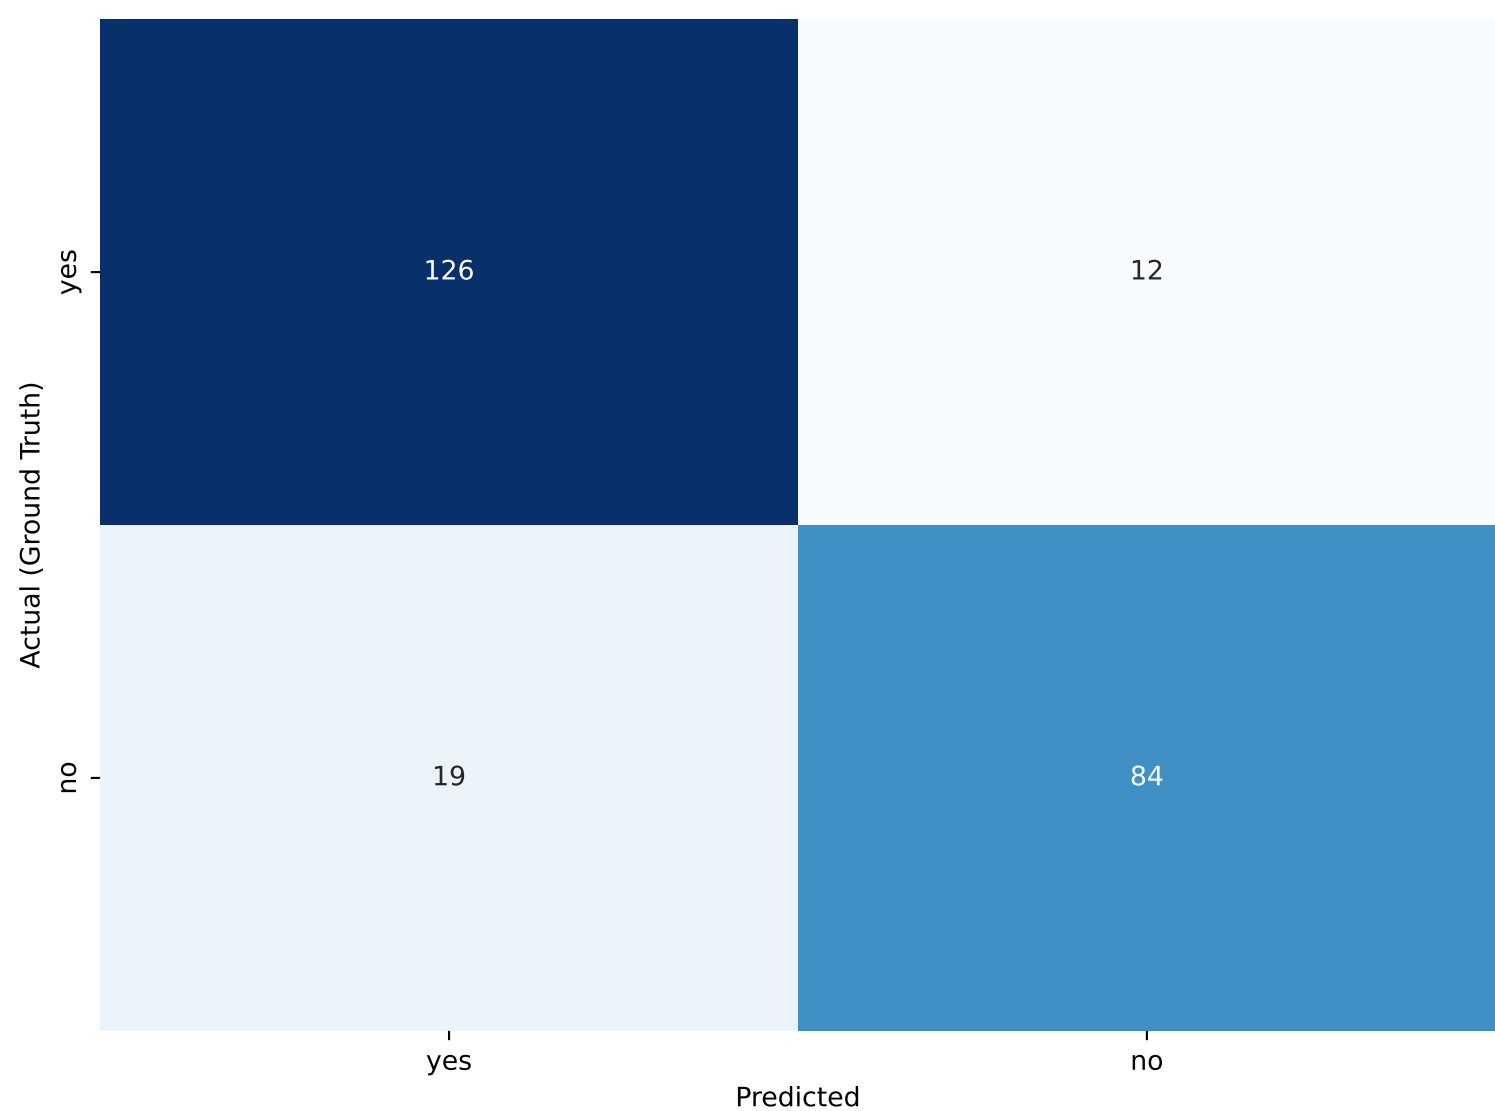

Supplement: supplementary_material [file cm_gpt-4.1-mini-2025-04-14_masked_COT.pdf › Supplementary Material/FindNICE Benchmark/visualizations/confusion_matrices/cm_gpt-4.1-mini-2025-04-14_masked_COT.pdf]

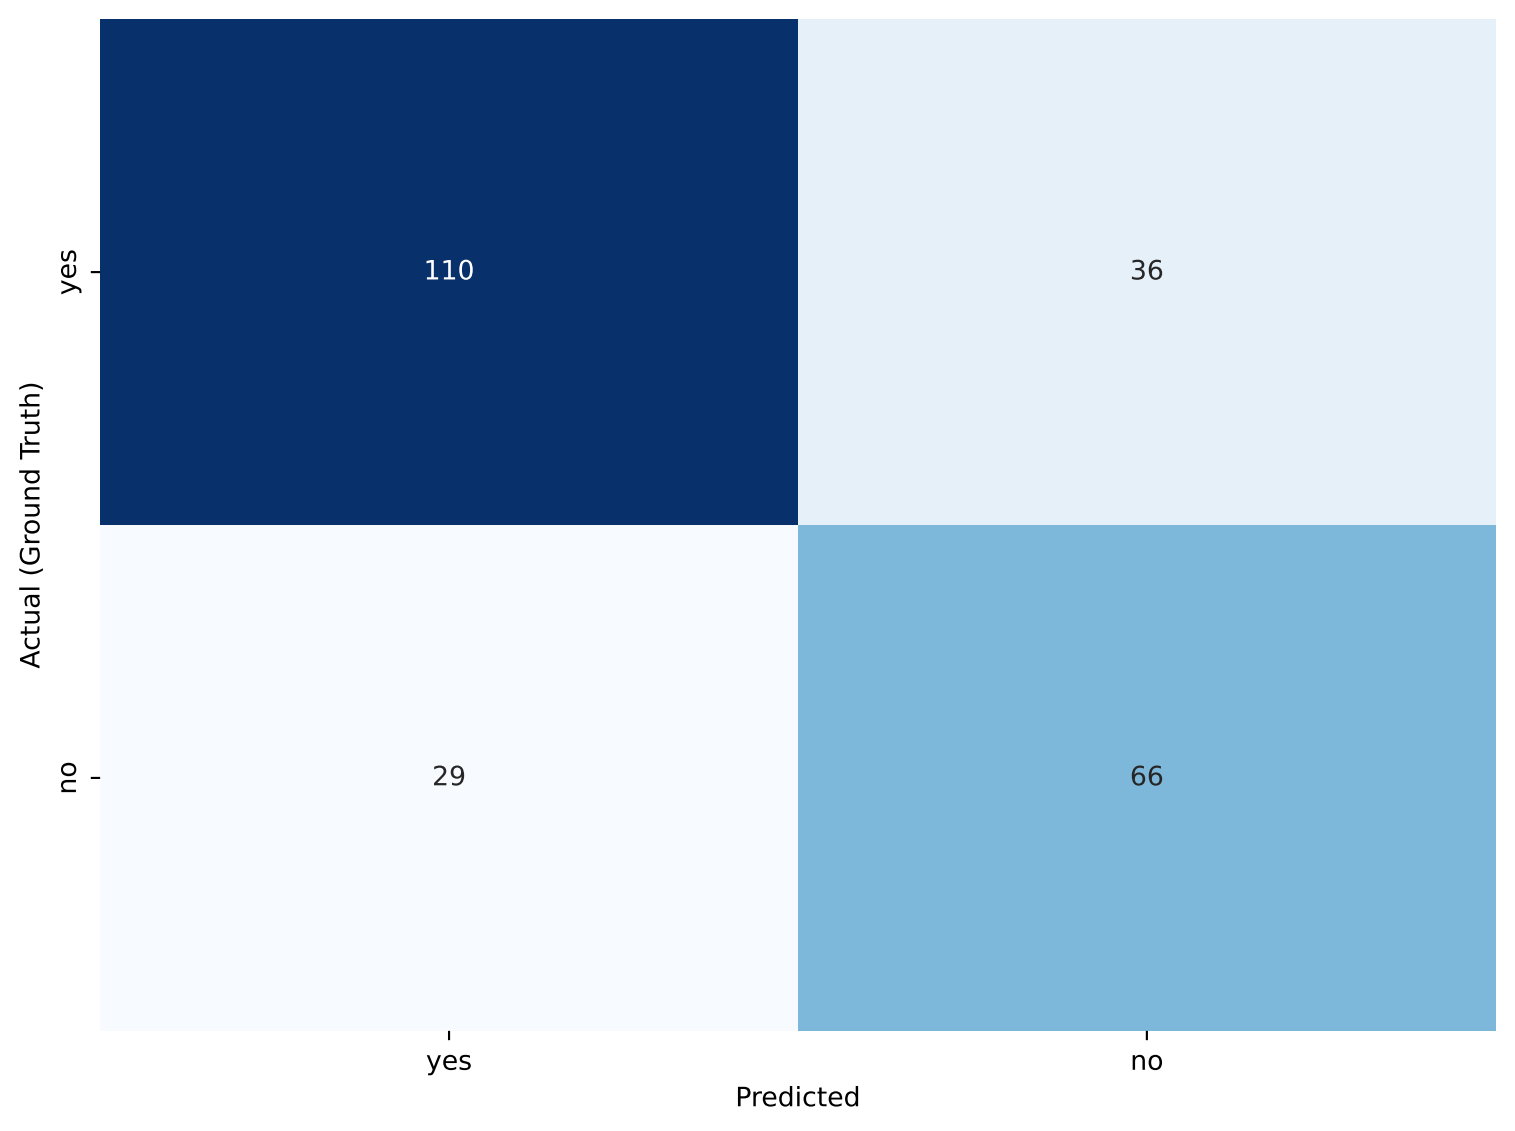

Supplement: supplementary_material [file cm_gpt-4.1-mini-2025-04-14_masked_ZS.pdf › Supplementary Material/FindNICE Benchmark/visualizations/confusion_matrices/cm_gpt-4.1-mini-2025-04-14_masked_ZS.pdf]

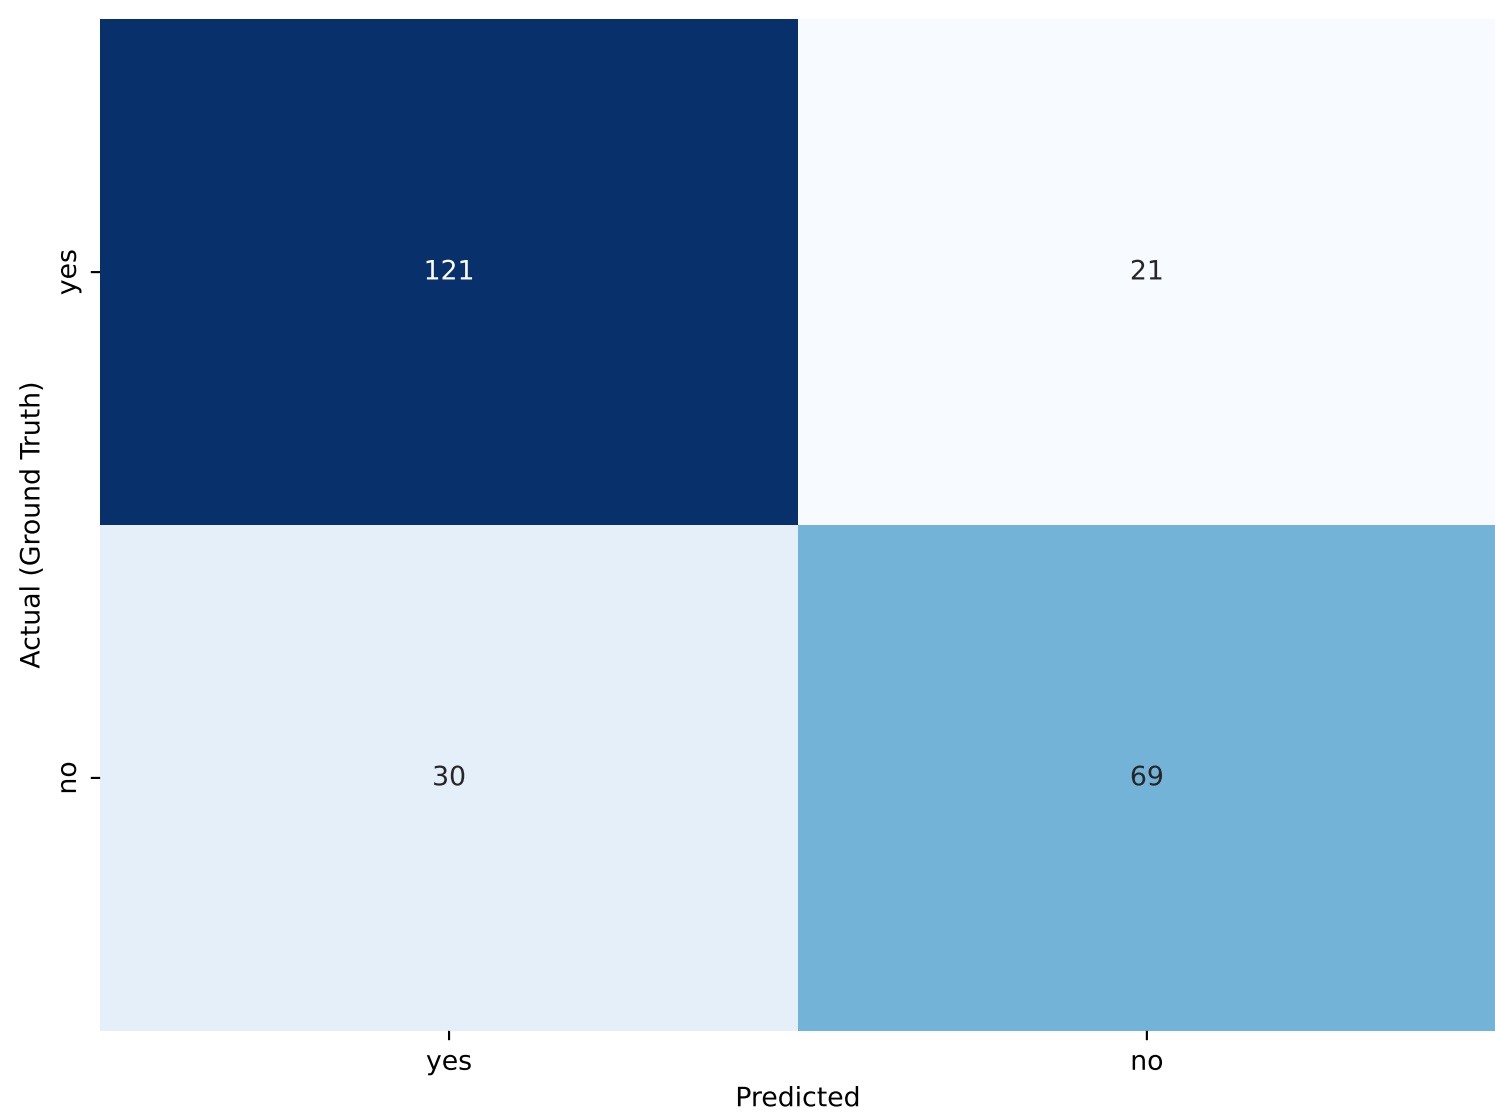

Supplement: supplementary_material [file cm_gpt-4.1-mini-2025-04-14_obfuscated_COT.pdf › Supplementary Material/FindNICE Benchmark/visualizations/confusion_matrices/cm_gpt-4.1-mini-2025-04-14_obfuscated_COT.pdf]

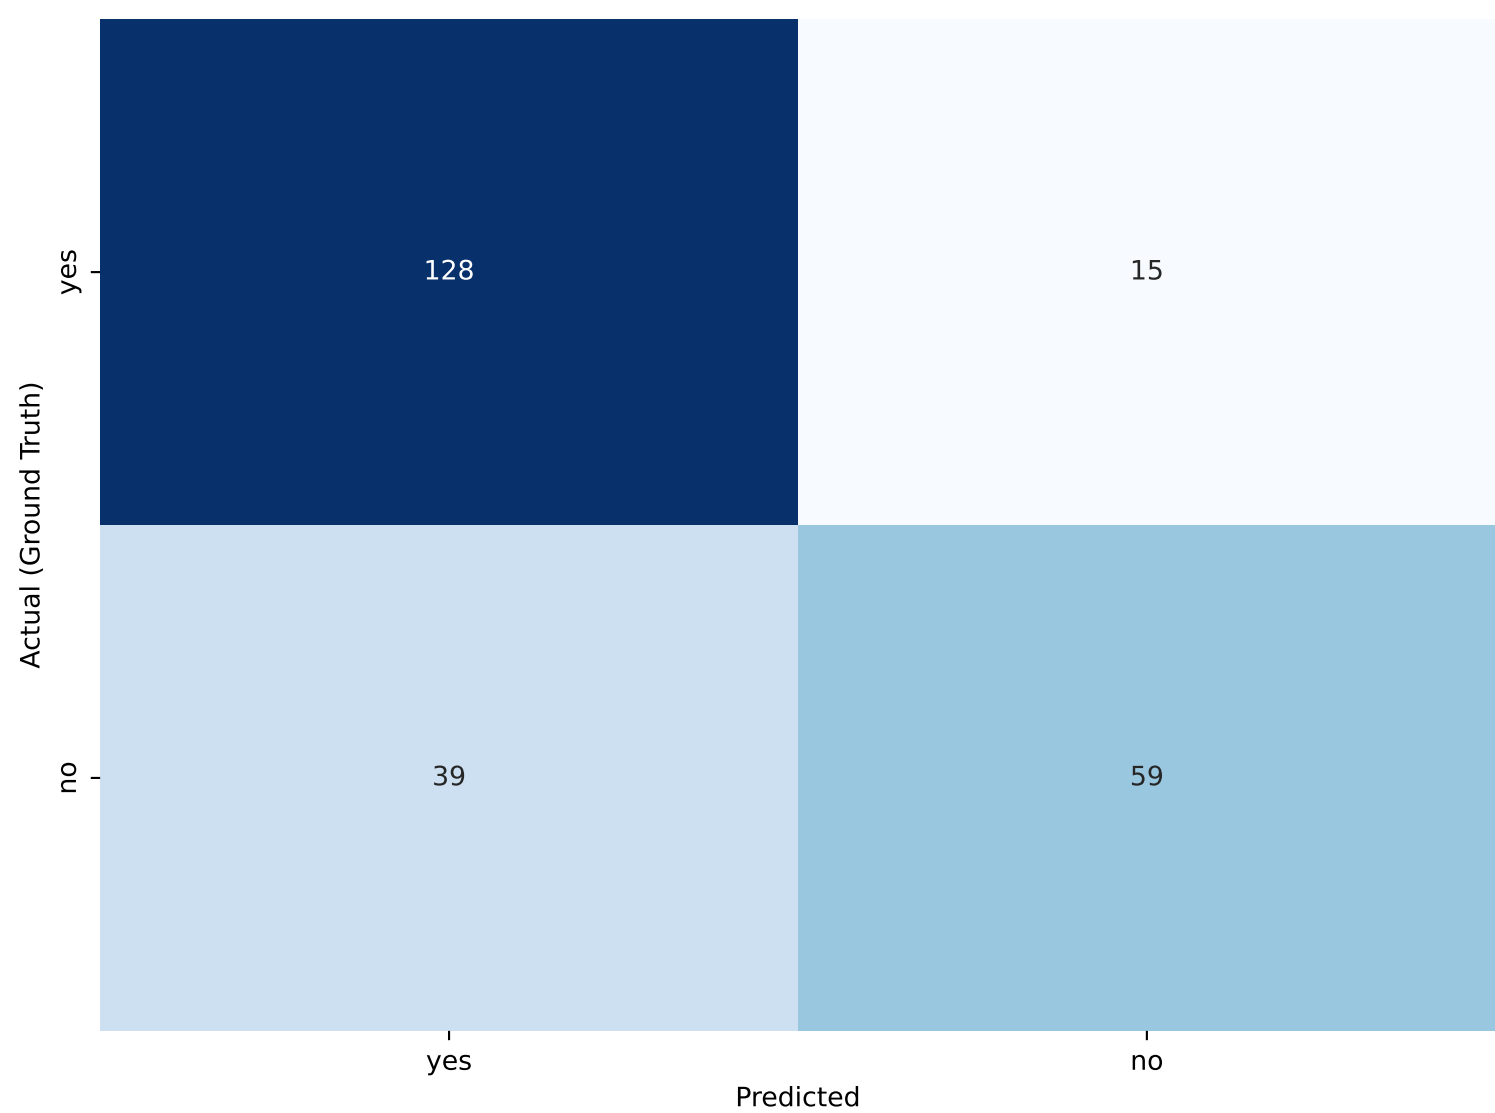

Supplement: supplementary_material [file cm_gpt-4.1-mini-2025-04-14_obfuscated_ZS.pdf › Supplementary Material/FindNICE Benchmark/visualizations/confusion_matrices/cm_gpt-4.1-mini-2025-04-14_obfuscated_ZS.pdf]
